# Supplementary material for: Filtering and continuously separating microplastics from water using electric field gradients formed electrochemically in the absence of buffer
Source: Royal Society of Chemistry journal article supplement (doi:10.1039/d1sc03192a), 2021-01-01
Supplement: d1sc03192a1.pdf [file d1sc03192a1.pdf]

## Continuous separation simulations-052621

|             |                          |
|-------------|--------------------------|
| Report date | May 26, 2021 10:53:06 AM |
|-------------|--------------------------|

# Contents

- 1. Global Definitions .....**
- 1.1. Parameters .....
- 2. Component 1 .....**
- 2.1. Definitions .....
- 2.2. Geometry 1 .....
- 2.3. Materials.....
- 2.4. Nernst-Planck Equations .....
- 2.5. Laminar Flow .....
- 2.6. Mesh 1 .....
- 3. Study 1 .....**
- 3.1. Stationary.....
- 3.2. Solver Configurations .....
- 4. Results .....**
- 4.1. Data Sets .....
- 4.2. Plot Groups .....

# 1 Global Definitions

|      |                          |
|------|--------------------------|
| Date | May 26, 2021 10:44:47 AM |
|------|--------------------------|

## GLOBAL SETTINGS

|             |                                                                                                     |
|-------------|-----------------------------------------------------------------------------------------------------|
| Name        | Continuous separation simulations-052621.mph                                                        |
| Path        | C:\Users\jrt3552\Documents\BED\final final simulations\Continuous separation simulations-052621.mph |
| Version     | COMSOL Multiphysics 5.5 (Build: 359)                                                                |
| Unit system | SI                                                                                                  |

## USED PRODUCTS

|                                      |
|--------------------------------------|
| COMSOL Multiphysics                  |
| Chemical Reaction Engineering Module |

## 1.1 PARAMETERS

### PARAMETERS 1

| Name    | Expression                    | Value                    | Description                        |
|---------|-------------------------------|--------------------------|------------------------------------|
| cheight | 15[um]                        | 1.5E-5 m                 | channel height                     |
| cwidth  | 200[um]                       | 2E-4 m                   | channel width                      |
| cH3O0   | $10^{-\text{pH0}}$ [M]        | 1E-4 mol/m <sup>3</sup>  | initial concentration of protons   |
| pH0     | 7                             | 7                        | initial solution pH                |
| cOH0    | $10^{-(14 - \text{pH0})}$ [M] | 1E-4 mol/m <sup>3</sup>  | initial concentration of hydroxide |
| cK0     | 5 [mM]                        | 5 mol/m <sup>3</sup>     | initial concentration of K         |
| cBead0  | 30 [fM]                       | 3E-11 mol/m <sup>3</sup> | initial concentration of microbead |
| cCl0    | cK0                           | 5 mol/m <sup>3</sup>     | initial concentration of Cl        |

| Name    | Expression                | Value                        | Description                                         |
|---------|---------------------------|------------------------------|-----------------------------------------------------|
| dH3O    | $9.103e-9[m^2/s]$         | $9.103E-9 m^2/s$             | diffusivity of proton                               |
| dOH     | $5.286e-9[m^2/s]$         | $5.286E-9 m^2/s$             | diffusivity of hydroxide                            |
| dK      | $1.97e-9[m^2/s]$          | $1.97E-9 m^2/s$              | diffusivity of microbeads                           |
| dBead   | $0.785e-9[m^2/s]$         | $7.85E-10 m^2/s$             | diffusivity of bead                                 |
| dCl     | $2.033e-9[m^2/s]$         | $2.033E-9 m^2/s$             | diffusivity of Cl                                   |
| issTOT  | 4.3[uA]                   | $4.3E-6 A$                   | total current passed through driving electrodes     |
| jssTOT  | $issTOT/(cwidth*cheight)$ | $1433.3 A/m^2$               | current density passed through channel              |
| issBPE  | 2900 [nA]                 | $2.9E-6 A$                   | steady-state current through BPE                    |
| jssBPE  | $issBPE/(elength*ewidth)$ | $1160 A/m^2$                 | current density at BPE                              |
| fssBPE  | $jssBPE/F$                | $0.012023 mol/(m^2 \cdot s)$ | flux at BPE                                         |
| elength | 50[um]                    | $5E-5 m$                     | length of BPE end                                   |
| ewidth  | 50[um]                    | $5E-5 m$                     | width of BPE end                                    |
| F       | 96485 [C/mol]             | $96485 C/mol$                | Faraday's constant                                  |
| kfhydro | $2e-5 [1/(s)]$            | $2E-5 1/s$                   | forward reaction rate constant for water hydrolysis |
| kbhydro | $1.4e11[1/(M*s)]$         | $1.4E8 m^3/(s \cdot mol)$    | backward reaction rate constant for                 |

| Name  | Expression | Value                    | Description            |
|-------|------------|--------------------------|------------------------|
|       |            |                          | water hydrolysis       |
| cH2O0 | 55.5 [M]   | 55500 mol/m <sup>3</sup> | concentration of water |
| T     | 293 [K]    | 293 K                    | Temperature            |

## 2 Component 1

|      |                        |
|------|------------------------|
| Date | Jan 3, 2020 8:56:10 AM |
|------|------------------------|

### SETTINGS

| Description                                                 | Value                 |
|-------------------------------------------------------------|-----------------------|
| Unit system                                                 | Same as global system |
| Geometry shape order                                        | Automatic             |
| Avoid inverted elements by curving interior domain elements | Off                   |

### SPATIAL FRAME COORDINATES

| First | Second | Third |
|-------|--------|-------|
| x     | y      | z     |

### MATERIAL FRAME COORDINATES

| First | Second | Third |
|-------|--------|-------|
| X     | Y      | Z     |

### GEOMETRY FRAME COORDINATES

| First | Second | Third |
|-------|--------|-------|
| Xg    | Yg     | Zg    |

### MESH FRAME COORDINATES

| First | Second | Third |
|-------|--------|-------|
| Xm    | Ym     | Zm    |

## 2.1 DEFINITIONS

### 2.1.1 Coordinate Systems

#### Boundary System 1

|                        |                 |
|------------------------|-----------------|
| Coordinate system type | Boundary system |
| Tag                    | sys1            |

### COORDINATE NAMES

| First | Second | Third |
|-------|--------|-------|
| t1    | n      | to    |

## 2.2 GEOMETRY 1

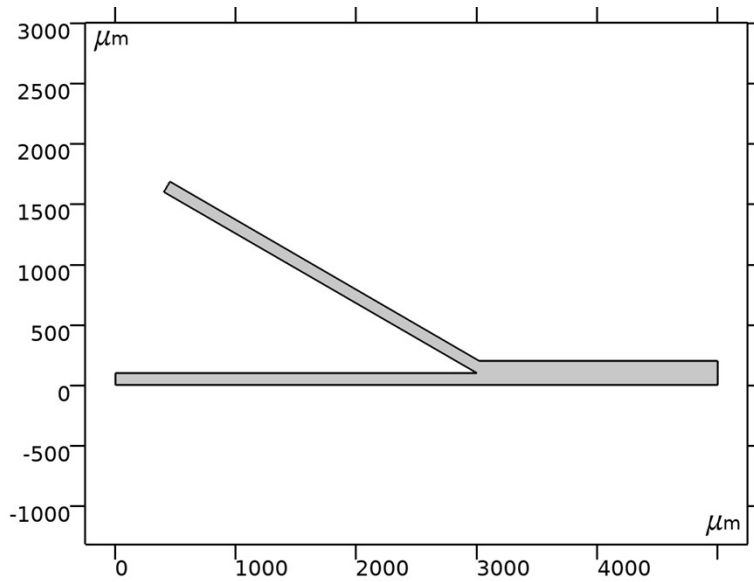

Geometry 1

### UNITS

|              |     |
|--------------|-----|
| Length unit  | μm  |
| Angular unit | deg |

### GEOMETRY STATISTICS

| Description          | Value |
|----------------------|-------|
| Space dimension      | 2     |
| Number of domains    | 1     |
| Number of boundaries | 12    |
| Number of vertices   | 12    |

### 2.2.1 Point 3 (pt3)

#### POINT

| Description      | Value     |
|------------------|-----------|
| Point coordinate | {3200, 0} |

## 2.2.2 Point 4 (pt4)

POINT

| Description      | Value     |
|------------------|-----------|
| Point coordinate | {3250, 0} |

## 2.2.3 Point 1 (pt1)

POINT

| Description      | Value    |
|------------------|----------|
| Point coordinate | {250, 0} |

## 2.2.4 Point 2 (pt2)

POINT

| Description      | Value    |
|------------------|----------|
| Point coordinate | {300, 0} |

## 2.2.5 0 0 (pol3)

OBJECT TYPE

| Description | Value |
|-------------|-------|
| Type        | Solid |

COORDINATES

| Description | Value |
|-------------|-------|
| Data source | Table |

COORDINATES

| x ( $\mu\text{m}$ ) | y ( $\mu\text{m}$ ) |
|---------------------|---------------------|
| 0                   | 0                   |
| 0                   | 100                 |
| 3000                | 100                 |
| 401.92              | 1600                |
| 451.92              | 1686.6              |
| 3020                | 200                 |
| 5000                | 200                 |
| 5000                | 0                   |
| 0                   | 0                   |



## 2.2.6 Polygon 1 (pol1)

### OBJECT TYPE

| <b>Description</b> | <b>Value</b> |
|--------------------|--------------|
| Type               | Solid        |

### COORDINATES

| <b>Description</b> | <b>Value</b> |
|--------------------|--------------|
| Data source        | Table        |

### COORDINATES

| <b>x (µm)</b> | <b>y (µm)</b> |
|---------------|---------------|
| 0             | 0             |
| 0             | 66.7          |
| 1000          | 66.7          |
| 133.974       | 566.7         |
| 167.324       | 624.464       |
| 1020          | 133.4         |
| 2960          | 133.4         |
| 2960          | 0             |
| 0             | 0             |
|               |               |

## 2.2.7 Form Union (fin)

### SETTINGS

| <b>Description</b> | <b>Value</b> |
|--------------------|--------------|
| Repair tolerance   | Automatic    |

## 2.3 MATERIALS

### 2.3.1 Water

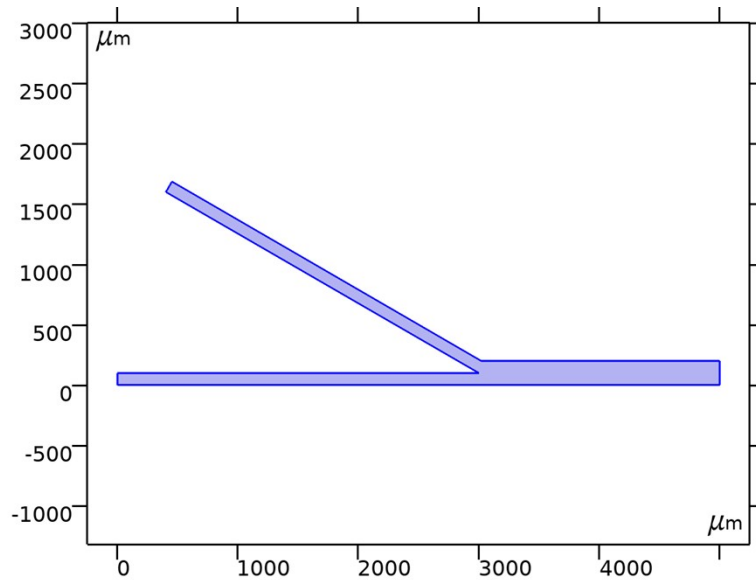

Water

#### SELECTION

|                        |                                          |
|------------------------|------------------------------------------|
| Geometric entity level | Domain                                   |
| Selection              | Geometry geom1: Dimension 2: All domains |

#### MATERIAL PARAMETERS

| Name              | Value  | Unit              |
|-------------------|--------|-------------------|
| Dynamic viscosity | eta(T) | Pa·s              |
| Density           | rho(T) | kg/m <sup>3</sup> |

#### BASIC SETTINGS

| Description                        | Value                                                           |
|------------------------------------|-----------------------------------------------------------------|
| Coefficient of thermal expansion   | {{alpha_p(T), 0, 0}, {0, alpha_p(T), 0}, {0, 0, alpha_p(T)}}    |
| Bulk viscosity                     | muB(T)                                                          |
| Dynamic viscosity                  | eta(T)                                                          |
| Ratio of specific heats            | gamma_w(T)                                                      |
| Electrical conductivity            | {{5.5e-6[S/m], 0, 0}, {0, 5.5e-6[S/m], 0}, {0, 0, 5.5e-6[S/m]}} |
| Heat capacity at constant pressure | Cp(T)                                                           |
| Density                            | rho(T)                                                          |
| Thermal conductivity               | {{k(T), 0, 0}, {0, k(T), 0}, {0, 0, k(T)}}                      |

| Description    | Value |
|----------------|-------|
| Speed of sound | cs(T) |

## FUNCTIONS

| Function name | Type          |
|---------------|---------------|
| eta           | Piecewise     |
| Cp            | Piecewise     |
| rho           | Piecewise     |
| k             | Piecewise     |
| cs            | Interpolation |
| alpha_p       | Analytic      |
| gamma_w       | Analytic      |
| muB           | Analytic      |

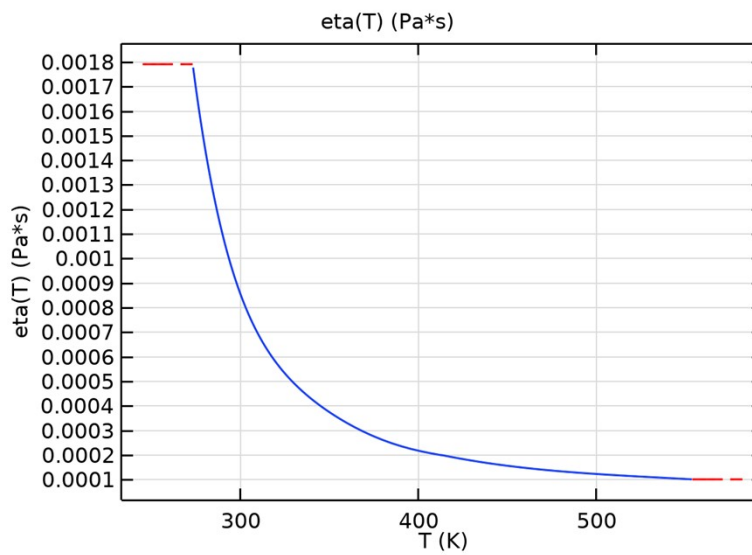

*eta*

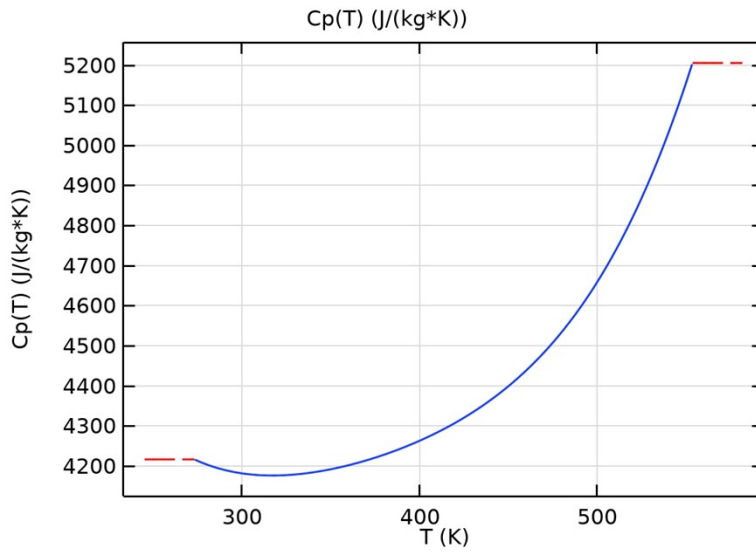

$C_p$

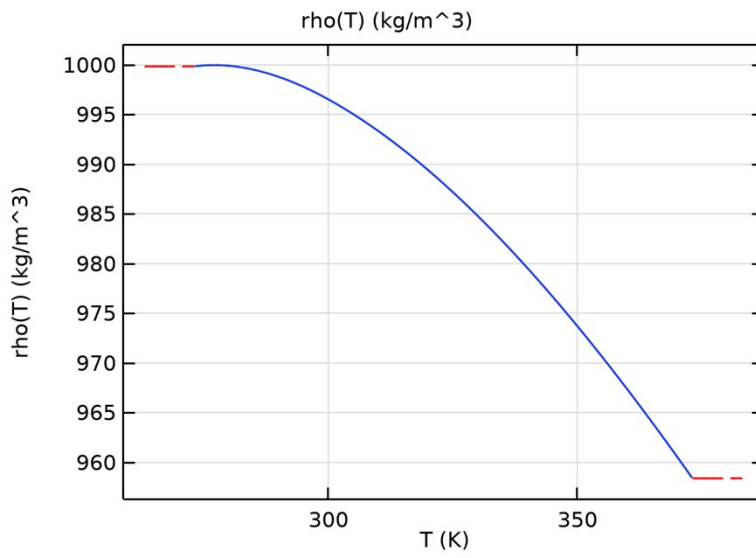

$\rho$

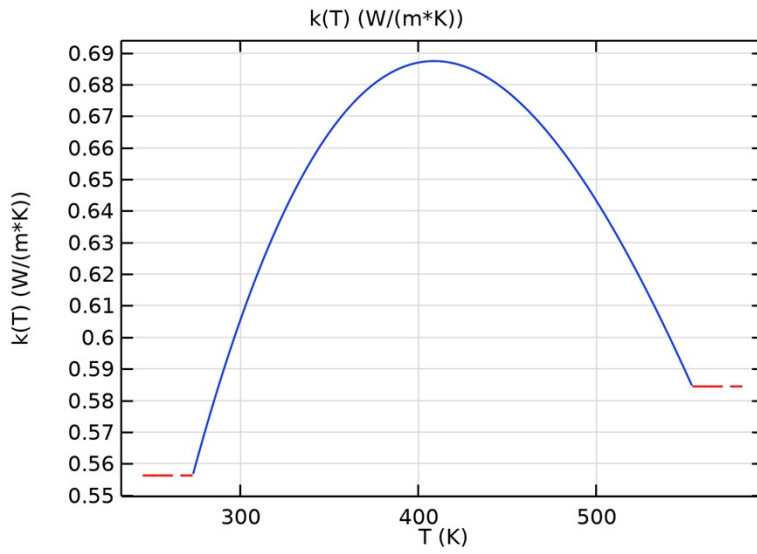

k

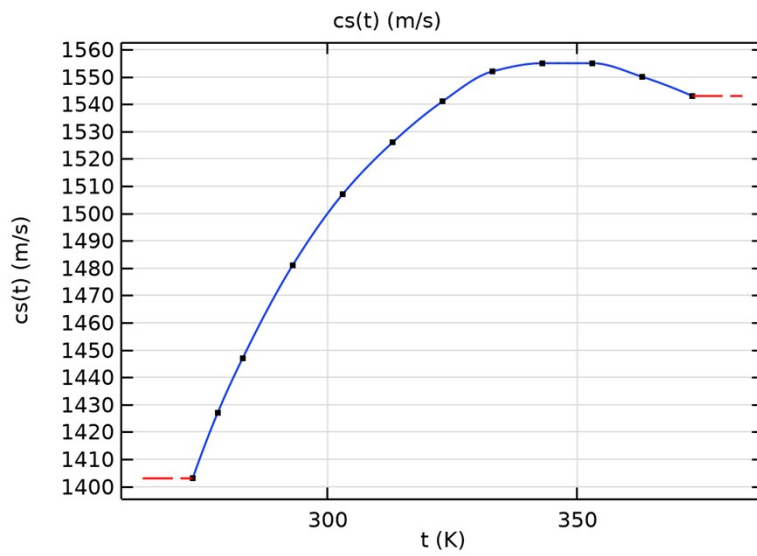

cs

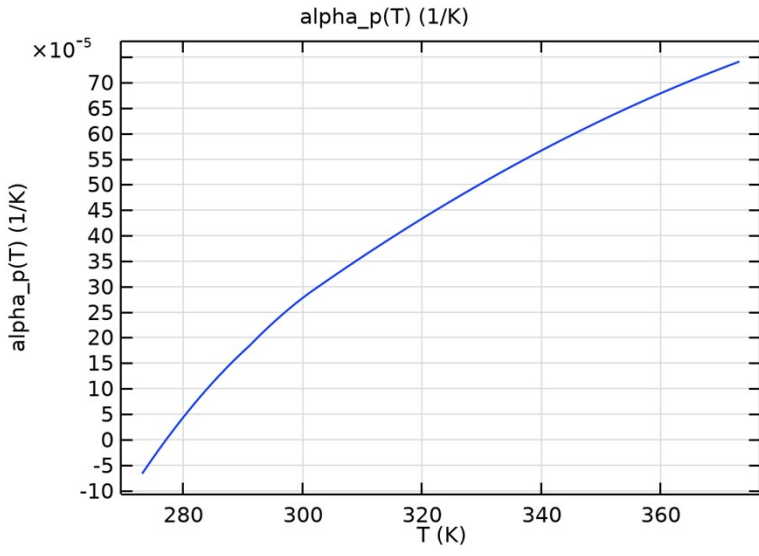

*alpha\_p*

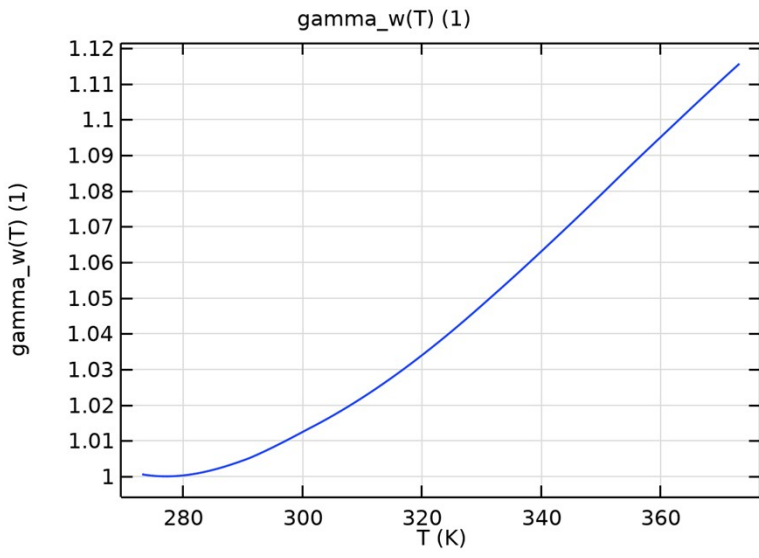

*gamma\_w*

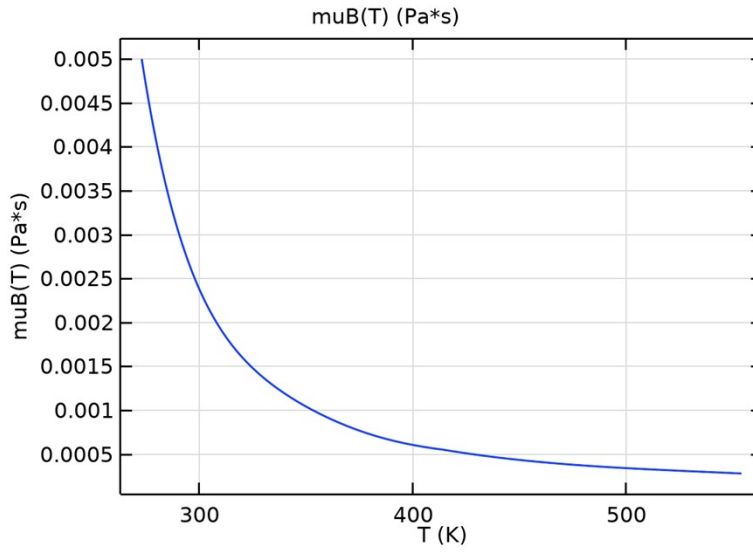

$\mu_B$

## 2.4 NERNST-PLANCK EQUATIONS

### USED PRODUCTS

|                                      |
|--------------------------------------|
| COMSOL Multiphysics                  |
| Chemical Reaction Engineering Module |

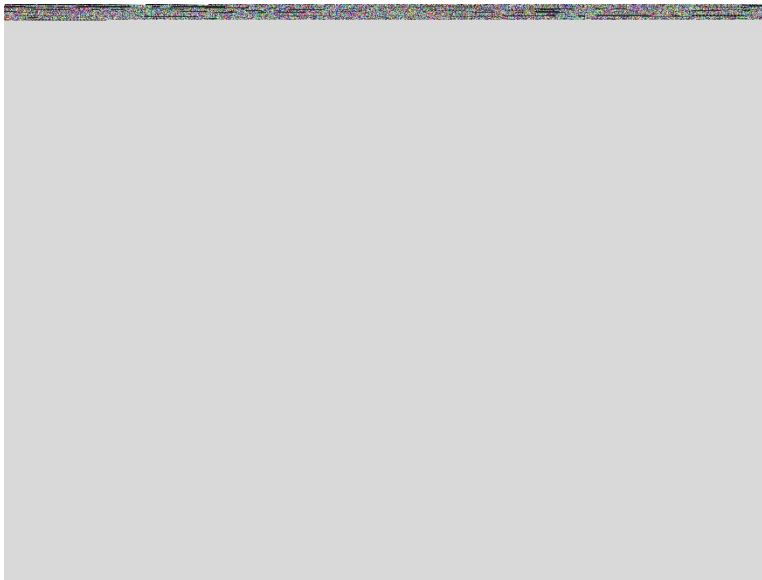

*Nernst-Planck Equations*

### SELECTION

|                        |        |
|------------------------|--------|
| Geometric entity level | Domain |
|------------------------|--------|

|           |                                          |
|-----------|------------------------------------------|
| Selection | Geometry geom1: Dimension 2: All domains |
|-----------|------------------------------------------|

### EQUATIONS

$$\nabla \cdot (\mathbf{J}_i + \mathbf{u}c_i) = R_i$$

$$\nabla \cdot \mathbf{i} = F \sum_i z_i R_i$$

$$\sum_i z_i c_i = 0$$

$$\mathbf{J}_i = -D_i \nabla c_i - z_i \mu_{m,i} F c_i \nabla V$$

$$\mathbf{i} = F \sum_i z_i (-D_i \nabla c_i - z_i \mu_{m,i} F c_i \nabla V)$$

## 2.4.1 Interface settings

### Discretization

#### SETTINGS

| Description        | Value     |
|--------------------|-----------|
| Concentration      | Quadratic |
| Electric potential | Quadratic |

## 2.4.2 Variables

| Name           | Expression                                         | Unit                    | Description              | Selection | Details |
|----------------|----------------------------------------------------|-------------------------|--------------------------|-----------|---------|
| domflux.cH3Ox  | npe.dflux_cH3Ox+npe.cflux_cH3Ox+npe.mflux_cH3Ox    | mol/(m <sup>2</sup> .s) | Domain flux, x component | Domain 1  |         |
| domflux.cH3Oy  | npe.dflux_cH3Oy+npe.cflux_cH3Oy+npe.mflux_cH3Oy    | mol/(m <sup>2</sup> .s) | Domain flux, y component | Domain 1  |         |
| domflux.cOHx   | npe.dflux_cOHx+npe.cflux_cOHx+npe.mflux_cOHx       | mol/(m <sup>2</sup> .s) | Domain flux, x component | Domain 1  |         |
| domflux.cOHy   | npe.dflux_cOHy+npe.cflux_cOHy+npe.mflux_cOHy       | mol/(m <sup>2</sup> .s) | Domain flux, y component | Domain 1  |         |
| domflux.cBeadx | npe.dflux_cBeadx+npe.cflux_cBeadx+npe.mflux_cBeadx | mol/(m <sup>2</sup> .s) | Domain flux, x component | Domain 1  |         |



| Name           | Expression                                         | Unit                    | Description                       | Selection       | Details |
|----------------|----------------------------------------------------|-------------------------|-----------------------------------|-----------------|---------|
| domflux.cBeady | npe.dflux_cBeady+npe.cflux_cBeady+npe.mflux_cBeady | mol/(m <sup>2</sup> .s) | Domain flux, y component          | Domain 1        |         |
| domflux.cKx    | npe.dflux_cKx+npe.cflux_cKx+npe.mflux_cKx          | mol/(m <sup>2</sup> .s) | Domain flux, x component          | Domain 1        |         |
| domflux.cKy    | npe.dflux_cKy+npe.cflux_cKy+npe.mflux_cKy          | mol/(m <sup>2</sup> .s) | Domain flux, y component          | Domain 1        |         |
| domflux.cClx   | npe.dflux_cClx+npe.cflux_cClx+npe.mflux_cClx       | mol/(m <sup>2</sup> .s) | Domain flux, x component          | Domain 1        |         |
| domflux.cCly   | npe.dflux_cCly+npe.cflux_cCly+npe.mflux_cCly       | mol/(m <sup>2</sup> .s) | Domain flux, y component          | Domain 1        |         |
| domflux.Vx     | npe.Jx                                             | A/m <sup>2</sup>        | Domain flux, x component          | Domain 1        |         |
| domflux.Vy     | npe.Jy                                             | A/m <sup>2</sup>        | Domain flux, y component          | Domain 1        |         |
| npe.nx         | dnx                                                | 1                       | Normal vector, x component        | Boundaries 1–12 |         |
| npe.ny         | dny                                                | 1                       | Normal vector, y component        | Boundaries 1–12 |         |
| npe.nz         | 0                                                  | 1                       | Normal vector, z component        | Boundaries 1–12 |         |
| npe.nxmesh     | dnxmesh                                            | 1                       | Normal vector (mesh), x component | Boundaries 1–12 |         |
| npe.nymesh     | dnymesh                                            | 1                       | Normal vector (mesh), y component | Boundaries 1–12 |         |
| npe.nzmesh     | 0                                                  | 1                       | Normal vector                     | Boundaries 1–12 |         |

| Name            | Expression                                                                                                                       | Unit                    | Description                 | Selection       | Details |
|-----------------|----------------------------------------------------------------------------------------------------------------------------------|-------------------------|-----------------------------|-----------------|---------|
|                 |                                                                                                                                  |                         | (mesh), z component         |                 |         |
| npe.nxc         | root.nxc/npe.ncLen                                                                                                               | 1                       | Normal vector, x component  | Boundaries 1–12 |         |
| npe.nyc         | root.nyc/npe.ncLen                                                                                                               | 1                       | Normal vector, y component  | Boundaries 1–12 |         |
| npe.nzc         | 0                                                                                                                                | 1                       | Normal vector, z component  | Boundaries 1–12 |         |
| npe.ncLen       | $\sqrt{\text{root.nxc}^2 + \text{root.nyc}^2 + \text{eps}}$                                                                      | 1                       | Help variable               | Boundaries 1–12 |         |
| npe.ndflux_cH3O | $\text{npe.dflux\_cH3Ox} * \text{npe.nxc} + \text{npe.dflux\_cH3Oy} * \text{npe.nyc} + \text{npe.dflux\_cH3Oz} * \text{npe.nzc}$ | mol/(m <sup>2</sup> .s) | Normal diffusive flux       | Boundaries 1–12 |         |
| npe.ncflux_cH3O | $\text{npe.cflux\_cH3Ox} * \text{npe.nxc} + \text{npe.cflux\_cH3Oy} * \text{npe.nyc} + \text{npe.cflux\_cH3Oz} * \text{npe.nzc}$ | mol/(m <sup>2</sup> .s) | Normal convective flux      | Boundaries 1–12 |         |
| npe.nmflux_cH3O | $\text{npe.mflux\_cH3Ox} * \text{npe.nxc} + \text{npe.mflux\_cH3Oy} * \text{npe.nyc} + \text{npe.mflux\_cH3Oz} * \text{npe.nzc}$ | mol/(m <sup>2</sup> .s) | Normal electrophoretic flux | Boundaries 1–12 |         |
| npe.ntflux_cH3O | npe.bndFlux_cH3O                                                                                                                 | mol/(m <sup>2</sup> .s) | Normal total flux           | Boundaries 1–12 |         |
| npe.ndflux_cOH  | $\text{npe.dflux\_cOHx} * \text{npe.nxc} + \text{npe.dflux\_cOHy} * \text{npe.nyc} + \text{npe.dflux\_cOHz} * \text{npe.nzc}$    | mol/(m <sup>2</sup> .s) | Normal diffusive flux       | Boundaries 1–12 |         |
| npe.ncflux_cOH  | $\text{npe.cflux\_cOHx} * \text{npe.nxc} + \text{npe.cflux\_cOHy} * \text{npe.nyc} + \text{npe.cflux\_cOHz} * \text{npe.nzc}$    | mol/(m <sup>2</sup> .s) | Normal convective flux      | Boundaries 1–12 |         |

| Name             | Expression                                                                                | Unit                    | Description                 | Selection       | Details |
|------------------|-------------------------------------------------------------------------------------------|-------------------------|-----------------------------|-----------------|---------|
|                  | $cflux\_cOHz * npe.nzc$                                                                   |                         |                             |                 |         |
| npe.nmflux_cOH   | $npe.mflux\_cOHx * npe.nxc + npe.mflux\_cOHy * npe.nyc + npe.mflux\_cOHz * npe.nzc$       | mol/(m <sup>2</sup> .s) | Normal electrophoretic flux | Boundaries 1–12 |         |
| npe.ntflux_cOH   | $npe.bndFlux\_cOH$                                                                        | mol/(m <sup>2</sup> .s) | Normal total flux           | Boundaries 1–12 |         |
| npe.ndflux_cBead | $npe.dflux\_cBeadx * npe.nxc + npe.dflux\_cBeady * npe.nyc + npe.dflux\_cBeadz * npe.nzc$ | mol/(m <sup>2</sup> .s) | Normal diffusive flux       | Boundaries 1–12 |         |
| npe.ncflux_cBead | $npe.cflux\_cBeadx * npe.nxc + npe.cflux\_cBeady * npe.nyc + npe.cflux\_cBeadz * npe.nzc$ | mol/(m <sup>2</sup> .s) | Normal convective flux      | Boundaries 1–12 |         |
| npe.nmflux_cBead | $npe.mflux\_cBeadx * npe.nxc + npe.mflux\_cBeady * npe.nyc + npe.mflux\_cBeadz * npe.nzc$ | mol/(m <sup>2</sup> .s) | Normal electrophoretic flux | Boundaries 1–12 |         |
| npe.ntflux_cBead | $npe.bndFlux\_cBead$                                                                      | mol/(m <sup>2</sup> .s) | Normal total flux           | Boundaries 1–12 |         |
| npe.ndflux_cK    | $npe.dflux\_cKx * npe.nxc + npe.dflux\_cKy * npe.nyc + npe.dflux\_cKz * npe.nzc$          | mol/(m <sup>2</sup> .s) | Normal diffusive flux       | Boundaries 1–12 |         |
| npe.ncflux_cK    | $npe.cflux\_cKx * npe.nxc + npe.cflux\_cKy * npe.nyc + npe.cflux\_cKz * npe.nzc$          | mol/(m <sup>2</sup> .s) | Normal convective flux      | Boundaries 1–12 |         |
| npe.nmflux_cK    | $npe.mflux\_cKx * npe.nxc + npe.mflux\_cKy * npe.nyc$                                     | mol/(m <sup>2</sup> .s) | Normal electrophoretic flux | Boundaries 1–12 |         |

| Name              | Expression                                                                                                                             | Unit                    | Description                 | Selection       | Details |
|-------------------|----------------------------------------------------------------------------------------------------------------------------------------|-------------------------|-----------------------------|-----------------|---------|
|                   | e.nyc+npe.mflux_cKz*npe.nzc                                                                                                            |                         |                             |                 |         |
| npe.ntflux_cK     | npe.bndFlux_cK                                                                                                                         | mol/(m <sup>2</sup> .s) | Normal total flux           | Boundaries 1–12 |         |
| npe.ndflux_cCl    | npe.dflux_cClx*npe.nxc+npe.dflux_cCly*npe.nyc+npe.dflux_cClz*npe.nzc                                                                   | mol/(m <sup>2</sup> .s) | Normal diffusive flux       | Boundaries 1–12 |         |
| npe.ncflux_cCl    | npe.cflux_cClx*npe.nxc+npe.cflux_cCly*npe.nyc+npe.cflux_cClz*npe.nzc                                                                   | mol/(m <sup>2</sup> .s) | Normal convective flux      | Boundaries 1–12 |         |
| npe.nmflux_cCl    | npe.mflux_cClx*npe.nxc+npe.mflux_cCly*npe.nyc+npe.mflux_cClz*npe.nzc                                                                   | mol/(m <sup>2</sup> .s) | Normal electrophoretic flux | Boundaries 1–12 |         |
| npe.ntflux_cCl    | (npe.cflux_cClx+npe.mflux_cClx)*npe.nxc+(npe.cflux_cCly+npe.mflux_cCly)*npe.nyc+(npe.cflux_cClz+npe.mflux_cClz)*npe.nzc+npe.ndflux_cCl | mol/(m <sup>2</sup> .s) | Normal total flux           | Boundaries 1–12 |         |
| npe.bndFlux_cH3O  | -dflux_spatial(cH3O)                                                                                                                   | mol/(m <sup>2</sup> .s) | Boundary flux               | Boundaries 1–12 |         |
| npe.bndFlux_cOH   | -dflux_spatial(cOH)                                                                                                                    | mol/(m <sup>2</sup> .s) | Boundary flux               | Boundaries 1–12 |         |
| npe.bndFlux_cBead | -dflux_spatial(cBead)                                                                                                                  | mol/(m <sup>2</sup> .s) | Boundary flux               | Boundaries 1–12 |         |
| npe.bndFlux_      | -                                                                                                                                      | mol/(m                  | Boundary flux               | Boundaries      |         |

| Name          | Expression            | Unit                    | Description                                         | Selection       | Details     |
|---------------|-----------------------|-------------------------|-----------------------------------------------------|-----------------|-------------|
| cK            | dflux_spatial(cK)     | $^2.s$                  |                                                     | s 1–12          |             |
| npe.bndFlux_V | -dflux_spatial(npe.V) | A/m <sup>2</sup>        | Boundary flux                                       | Boundaries 1–12 |             |
| npe.nI        | npe.bndFlux_V         | A/m <sup>2</sup>        | Normal electrolyte current density                  | Boundaries 1–12 |             |
| npe.R_cH3O    | 0                     | mol/(m <sup>3</sup> .s) | Total rate expression                               | Domain 1        | + operation |
| npe.cP_cH3O   | 0                     | mol/kg                  | Concentration species absorbed to the solid         | Domain 1        | + operation |
| npe.cP_cH3O   | 0                     | mol/kg                  | Concentration species absorbed to the solid         | Boundaries 1–12 | + operation |
| npe.KP_cH3O   | 0                     | m <sup>3</sup> /kg      | Adsorption isotherm, first concentration derivative | Domain 1        | + operation |
| npe.KP_cH3O   | 0                     | m <sup>3</sup> /kg      | Adsorption isotherm, first concentration derivative | Boundaries 1–12 | + operation |
| npe.R_cOH     | 0                     | mol/(m <sup>3</sup> .s) | Total rate expression                               | Domain 1        | + operation |
| npe.cP_cOH    | 0                     | mol/kg                  | Concentration species absorbed to the solid         | Domain 1        | + operation |
| npe.cP_cOH    | 0                     | mol/kg                  | Concentration species absorbed to the solid         | Boundaries 1–12 | + operation |
| npe.KP_cOH    | 0                     | m <sup>3</sup> /kg      | Adsorption isotherm, first concentration derivative | Domain 1        | + operation |
| npe.KP_cOH    | 0                     | m <sup>3</sup> /kg      | Adsorption isotherm, first                          | Boundaries 1–12 | + operation |

| Name         | Expression | Unit                    | Description                                         | Selection       | Details     |
|--------------|------------|-------------------------|-----------------------------------------------------|-----------------|-------------|
|              |            |                         | concentration derivative                            |                 |             |
| npe.R_cBead  | 0          | mol/(m <sup>3</sup> .s) | Total rate expression                               | Domain 1        | + operation |
| npe.cP_cBead | 0          | mol/kg                  | Concentration species absorbed to the solid         | Domain 1        | + operation |
| npe.cP_cBead | 0          | mol/kg                  | Concentration species absorbed to the solid         | Boundaries 1–12 | + operation |
| npe.KP_cBead | 0          | m <sup>3</sup> /kg      | Adsorption isotherm, first concentration derivative | Domain 1        | + operation |
| npe.KP_cBead | 0          | m <sup>3</sup> /kg      | Adsorption isotherm, first concentration derivative | Boundaries 1–12 | + operation |
| npe.R_cK     | 0          | mol/(m <sup>3</sup> .s) | Total rate expression                               | Domain 1        | + operation |
| npe.cP_cK    | 0          | mol/kg                  | Concentration species absorbed to the solid         | Domain 1        | + operation |
| npe.cP_cK    | 0          | mol/kg                  | Concentration species absorbed to the solid         | Boundaries 1–12 | + operation |
| npe.KP_cK    | 0          | m <sup>3</sup> /kg      | Adsorption isotherm, first concentration derivative | Domain 1        | + operation |
| npe.KP_cK    | 0          | m <sup>3</sup> /kg      | Adsorption isotherm, first concentration derivative | Boundaries 1–12 | + operation |
| npe.R_cCl    | 0          | mol/(m <sup>3</sup> .s) | Total rate expression                               | Domain 1        | + operation |
| npe.cP_cCl   | 0          | mol/kg                  | Concentration species absorbed to                   | Domain 1        | + operation |

| Name          | Expression | Unit                    | Description                                         | Selection       | Details     |
|---------------|------------|-------------------------|-----------------------------------------------------|-----------------|-------------|
|               |            |                         | the solid                                           |                 |             |
| npe.cP_cCl    | 0          | mol/kg                  | Concentration species absorbed to the solid         | Boundaries 1–12 | + operation |
| npe.KP_cCl    | 0          | m <sup>3</sup> /kg      | Adsorption isotherm, first concentration derivative | Domain 1        | + operation |
| npe.KP_cCl    | 0          | m <sup>3</sup> /kg      | Adsorption isotherm, first concentration derivative | Boundaries 1–12 | + operation |
| npe.cbf_cH3O  | 0          | mol/(m <sup>2</sup> .s) | Convective boundary flux                            | Boundaries 1–12 |             |
| npe.cbf_cOH   | 0          | mol/(m <sup>2</sup> .s) | Convective boundary flux                            | Boundaries 1–12 |             |
| npe.cbf_cBead | 0          | mol/(m <sup>2</sup> .s) | Convective boundary flux                            | Boundaries 1–12 |             |
| npe.cbf_cK    | 0          | mol/(m <sup>2</sup> .s) | Convective boundary flux                            | Boundaries 1–12 |             |

### 2.4.3 Convection, Diffusion, and Migration 1

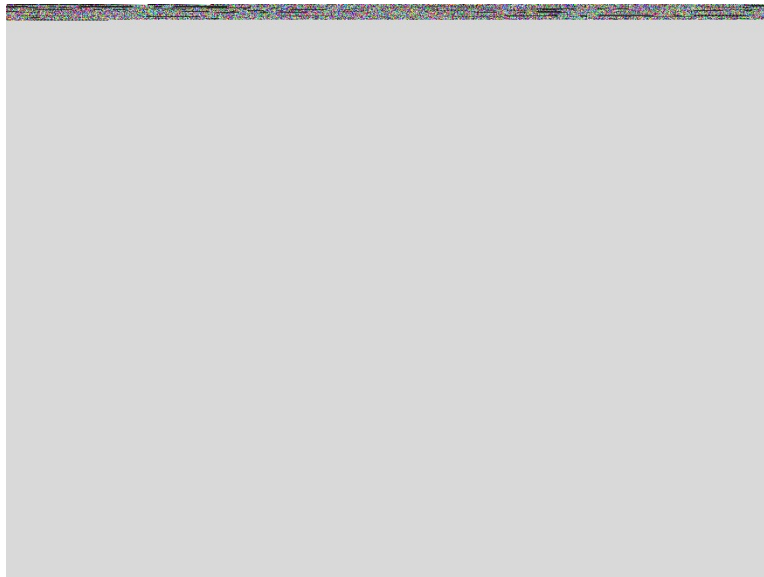

*Convection, Diffusion, and Migration 1*

#### SELECTION

|                        |        |
|------------------------|--------|
| Geometric entity level | Domain |
|------------------------|--------|

|           |                                          |
|-----------|------------------------------------------|
| Selection | Geometry geom1: Dimension 2: All domains |
|-----------|------------------------------------------|

### EQUATIONS

$$\nabla \cdot (\mathbf{J}_i + \mathbf{u}c_i) = R_i$$

$$\nabla \cdot \mathbf{i} = F \sum_i z_i R_i$$

$$\sum_i z_i c_i = 0$$

$$\mathbf{J}_i = -D_i \nabla c_i - z_i \mu_{m,i} F c_i \nabla V$$

$$\mathbf{i} = F \sum_i z_i (-D_i \nabla c_i - z_i \mu_{m,i} F c_i \nabla V)$$

### Convection

#### SETTINGS

| Description    | Value                |
|----------------|----------------------|
| Velocity field | Velocity field (spf) |

### Diffusion

#### SETTINGS

| Description           | Value                                         |
|-----------------------|-----------------------------------------------|
| Material              | Water (mat1)                                  |
| Diffusion coefficient | User defined                                  |
| Diffusion coefficient | {{dH3O, 0, 0}, {0, dH3O, 0}, {0, 0, dH3O}}    |
| Diffusion coefficient | User defined                                  |
| Diffusion coefficient | {{dOH, 0, 0}, {0, dOH, 0}, {0, 0, dOH}}       |
| Diffusion coefficient | User defined                                  |
| Diffusion coefficient | {{dBead, 0, 0}, {0, dBead, 0}, {0, 0, dBead}} |
| Diffusion coefficient | User defined                                  |
| Diffusion coefficient | {{dK, 0, 0}, {0, dK, 0}, {0, 0, dK}}          |
| Diffusion coefficient | User defined                                  |
| Diffusion coefficient | {{dCl, 0, 0}, {0, dCl, 0}, {0, 0, dCl}}       |

### Migration in electric field

#### SETTINGS

| Description   | Value                      |
|---------------|----------------------------|
| Mobility      | Nernst - Einstein relation |
| Charge number | {1, -1, -1, 1, -1}         |



## Coordinate system selection

### SETTINGS

| Description       | Value                    |
|-------------------|--------------------------|
| Coordinate system | Global coordinate system |

## Model input

### SETTINGS

| Description | Value        |
|-------------|--------------|
| Temperature | User defined |
| Temperature | T            |

## Variables

| Name                     | Expression                     | Unit               | Description                         | Selection | Details |
|--------------------------|--------------------------------|--------------------|-------------------------------------|-----------|---------|
| cCl                      | $npe.ctemp/(npe.e.z\_cCl+eps)$ | mol/m <sup>3</sup> | Concentration                       | Domain 1  |         |
| npe.D_ch3Ox <sub>x</sub> | dH3O                           | m <sup>2</sup> /s  | Diffusion coefficient, xx component | Domain 1  |         |
| npe.D_ch3Oy <sub>x</sub> | 0                              | m <sup>2</sup> /s  | Diffusion coefficient, yx component | Domain 1  |         |
| npe.D_ch3Oz <sub>x</sub> | 0                              | m <sup>2</sup> /s  | Diffusion coefficient, zx component | Domain 1  |         |
| npe.D_ch3Ox <sub>y</sub> | 0                              | m <sup>2</sup> /s  | Diffusion coefficient, xy component | Domain 1  |         |
| npe.D_ch3Oy <sub>y</sub> | dH3O                           | m <sup>2</sup> /s  | Diffusion coefficient, yy component | Domain 1  |         |
| npe.D_ch3Oz <sub>y</sub> | 0                              | m <sup>2</sup> /s  | Diffusion coefficient, zy component | Domain 1  |         |
| npe.D_ch3Ox <sub>z</sub> | 0                              | m <sup>2</sup> /s  | Diffusion coefficient, xz component | Domain 1  |         |
| npe.D_ch3Oy <sub>z</sub> | 0                              | m <sup>2</sup> /s  | Diffusion coefficient, yz component | Domain 1  |         |

| Name              | Expression | Unit              | Description                         | Selection | Details |
|-------------------|------------|-------------------|-------------------------------------|-----------|---------|
|                   |            |                   | component                           |           |         |
| npe.D_cH3Oz<br>z  | dH3O       | m <sup>2</sup> /s | Diffusion coefficient, zz component | Domain 1  |         |
| npe.D_cOHxx       | dOH        | m <sup>2</sup> /s | Diffusion coefficient, xx component | Domain 1  |         |
| npe.D_cOHyx       | 0          | m <sup>2</sup> /s | Diffusion coefficient, yx component | Domain 1  |         |
| npe.D_cOHxz       | 0          | m <sup>2</sup> /s | Diffusion coefficient, zx component | Domain 1  |         |
| npe.D_cOHxy       | 0          | m <sup>2</sup> /s | Diffusion coefficient, xy component | Domain 1  |         |
| npe.D_cOHyy       | dOH        | m <sup>2</sup> /s | Diffusion coefficient, yy component | Domain 1  |         |
| npe.D_cOHzy       | 0          | m <sup>2</sup> /s | Diffusion coefficient, zy component | Domain 1  |         |
| npe.D_cOHxz       | 0          | m <sup>2</sup> /s | Diffusion coefficient, xz component | Domain 1  |         |
| npe.D_cOHyz       | 0          | m <sup>2</sup> /s | Diffusion coefficient, yz component | Domain 1  |         |
| npe.D_cOHzz       | dOH        | m <sup>2</sup> /s | Diffusion coefficient, zz component | Domain 1  |         |
| npe.D_cBead<br>xx | dBead      | m <sup>2</sup> /s | Diffusion coefficient, xx component | Domain 1  |         |
| npe.D_cBead<br>yx | 0          | m <sup>2</sup> /s | Diffusion coefficient, yx component | Domain 1  |         |
| npe.D_cBead<br>zx | 0          | m <sup>2</sup> /s | Diffusion coefficient, zx component | Domain 1  |         |
| npe.D_cBead<br>xy | 0          | m <sup>2</sup> /s | Diffusion coefficient, xy component | Domain 1  |         |

| Name              | Expression | Unit              | Description                               | Selection | Details |
|-------------------|------------|-------------------|-------------------------------------------|-----------|---------|
| npe.D_cBead<br>yy | dBead      | m <sup>2</sup> /s | Diffusion<br>coefficient, yy<br>component | Domain 1  |         |
| npe.D_cBead<br>zy | 0          | m <sup>2</sup> /s | Diffusion<br>coefficient, zy<br>component | Domain 1  |         |
| npe.D_cBead<br>xz | 0          | m <sup>2</sup> /s | Diffusion<br>coefficient, xz<br>component | Domain 1  |         |
| npe.D_cBead<br>yz | 0          | m <sup>2</sup> /s | Diffusion<br>coefficient, yz<br>component | Domain 1  |         |
| npe.D_cBead<br>zz | dBead      | m <sup>2</sup> /s | Diffusion<br>coefficient, zz<br>component | Domain 1  |         |
| npe.D_cKxx        | dK         | m <sup>2</sup> /s | Diffusion<br>coefficient, xx<br>component | Domain 1  |         |
| npe.D_cKyx        | 0          | m <sup>2</sup> /s | Diffusion<br>coefficient, yx<br>component | Domain 1  |         |
| npe.D_cKzx        | 0          | m <sup>2</sup> /s | Diffusion<br>coefficient, zx<br>component | Domain 1  |         |
| npe.D_cKxy        | 0          | m <sup>2</sup> /s | Diffusion<br>coefficient, xy<br>component | Domain 1  |         |
| npe.D_cKyy        | dK         | m <sup>2</sup> /s | Diffusion<br>coefficient, yy<br>component | Domain 1  |         |
| npe.D_cKzy        | 0          | m <sup>2</sup> /s | Diffusion<br>coefficient, zy<br>component | Domain 1  |         |
| npe.D_cKxz        | 0          | m <sup>2</sup> /s | Diffusion<br>coefficient, xz<br>component | Domain 1  |         |
| npe.D_cKyz        | 0          | m <sup>2</sup> /s | Diffusion<br>coefficient, yz<br>component | Domain 1  |         |
| npe.D_cKzz        | dK         | m <sup>2</sup> /s | Diffusion<br>coefficient, zz<br>component | Domain 1  |         |

| Name          | Expression                                             | Unit              | Description                         | Selection | Details |
|---------------|--------------------------------------------------------|-------------------|-------------------------------------|-----------|---------|
| npe.D_cClxx   | dCl                                                    | m <sup>2</sup> /s | Diffusion coefficient, xx component | Domain 1  |         |
| npe.D_cClyx   | 0                                                      | m <sup>2</sup> /s | Diffusion coefficient, yx component | Domain 1  |         |
| npe.D_cClzx   | 0                                                      | m <sup>2</sup> /s | Diffusion coefficient, zx component | Domain 1  |         |
| npe.D_cClxy   | 0                                                      | m <sup>2</sup> /s | Diffusion coefficient, xy component | Domain 1  |         |
| npe.D_cClyy   | dCl                                                    | m <sup>2</sup> /s | Diffusion coefficient, yy component | Domain 1  |         |
| npe.D_cClzy   | 0                                                      | m <sup>2</sup> /s | Diffusion coefficient, zy component | Domain 1  |         |
| npe.D_cClxz   | 0                                                      | m <sup>2</sup> /s | Diffusion coefficient, xz component | Domain 1  |         |
| npe.D_cClyz   | 0                                                      | m <sup>2</sup> /s | Diffusion coefficient, yz component | Domain 1  |         |
| npe.D_cClzz   | dCl                                                    | m <sup>2</sup> /s | Diffusion coefficient, zz component | Domain 1  |         |
| npe.um_ch3Oxx | npe.D_ch3Oxx / (R_const*npe.cdm1.mininput_temperature) | s·mol/kg          | Mobility, xx component              | Domain 1  |         |
| npe.um_ch3Oyx | npe.D_ch3Oyx / (R_const*npe.cdm1.mininput_temperature) | s·mol/kg          | Mobility, yx component              | Domain 1  |         |
| npe.um_ch3Ozx | npe.D_ch3Ozx / (R_const*npe.cdm1.mininput_temperature) | s·mol/kg          | Mobility, zx component              | Domain 1  |         |
| npe.um_ch3Oxy | npe.D_ch3Oxy / (R_const*npe.cdm1.mininput_temperature) | s·mol/kg          | Mobility, xy component              | Domain 1  |         |

| Name          | Expression                                                    | Unit     | Description            | Selection | Details |
|---------------|---------------------------------------------------------------|----------|------------------------|-----------|---------|
| npe.um_ch3Oyy | $npe.D\_ch3Oyy / (R\_const * npe.cdm1.mininput\_temperature)$ | s·mol/kg | Mobility, yy component | Domain 1  |         |
| npe.um_ch3Ozy | $npe.D\_ch3Ozy / (R\_const * npe.cdm1.mininput\_temperature)$ | s·mol/kg | Mobility, zy component | Domain 1  |         |
| npe.um_ch3Oxz | $npe.D\_ch3Oxz / (R\_const * npe.cdm1.mininput\_temperature)$ | s·mol/kg | Mobility, xz component | Domain 1  |         |
| npe.um_ch3Oyz | $npe.D\_ch3Oyz / (R\_const * npe.cdm1.mininput\_temperature)$ | s·mol/kg | Mobility, yz component | Domain 1  |         |
| npe.um_ch3Ozz | $npe.D\_ch3Ozz / (R\_const * npe.cdm1.mininput\_temperature)$ | s·mol/kg | Mobility, zz component | Domain 1  |         |
| npe.z_ch3O    | 1                                                             | 1        | Charge number          | Domain 1  |         |
| npe.um_cOHxx  | $npe.D\_cOHxx / (R\_const * npe.cdm1.mininput\_temperature)$  | s·mol/kg | Mobility, xx component | Domain 1  |         |
| npe.um_cOHyx  | $npe.D\_cOHyx / (R\_const * npe.cdm1.mininput\_temperature)$  | s·mol/kg | Mobility, yx component | Domain 1  |         |
| npe.um_cOHzx  | $npe.D\_cOHzx / (R\_const * npe.cdm1.mininput\_temperature)$  | s·mol/kg | Mobility, zx component | Domain 1  |         |
| npe.um_cOHxy  | $npe.D\_cOHxy / (R\_const * npe.cdm1.mininput\_temperature)$  | s·mol/kg | Mobility, xy component | Domain 1  |         |
| npe.um_cOHyy  | $npe.D\_cOHyy / (R\_const * npe.cdm1.mininput\_temperature)$  | s·mol/kg | Mobility, yy component | Domain 1  |         |
| npe.um_cOHzy  | $npe.D\_cOHzy / (R\_const * npe.cdm1.mininput\_temperature)$  | s·mol/kg | Mobility, zy component | Domain 1  |         |

| Name           | Expression                                                 | Unit     | Description            | Selection | Details |
|----------------|------------------------------------------------------------|----------|------------------------|-----------|---------|
| zy             | dm1.mininput_temperature)                                  | g        | component              |           |         |
| npe.um_cOHxz   | $npe.D\_cOHxz/(R\_const*npe.cdm1.mininput\_temperature)$   | s·mol/kg | Mobility, xz component | Domain 1  |         |
| npe.um_cOHyz   | $npe.D\_cOHyz/(R\_const*npe.cdm1.mininput\_temperature)$   | s·mol/kg | Mobility, yz component | Domain 1  |         |
| npe.um_cOHzz   | $npe.D\_cOHzz/(R\_const*npe.cdm1.mininput\_temperature)$   | s·mol/kg | Mobility, zz component | Domain 1  |         |
| npe.z_cOH      | -1                                                         | 1        | Charge number          | Domain 1  |         |
| npe.um_cBeadxx | $npe.D\_cBeadxx/(R\_const*npe.cdm1.mininput\_temperature)$ | s·mol/kg | Mobility, xx component | Domain 1  |         |
| npe.um_cBeadyx | $npe.D\_cBeadyx/(R\_const*npe.cdm1.mininput\_temperature)$ | s·mol/kg | Mobility, yx component | Domain 1  |         |
| npe.um_cBeadzx | $npe.D\_cBeadzx/(R\_const*npe.cdm1.mininput\_temperature)$ | s·mol/kg | Mobility, zx component | Domain 1  |         |
| npe.um_cBeadxy | $npe.D\_cBeadxy/(R\_const*npe.cdm1.mininput\_temperature)$ | s·mol/kg | Mobility, xy component | Domain 1  |         |
| npe.um_cBeadyy | $npe.D\_cBeadyy/(R\_const*npe.cdm1.mininput\_temperature)$ | s·mol/kg | Mobility, yy component | Domain 1  |         |
| npe.um_cBeadzy | $npe.D\_cBeadzy/(R\_const*npe.cdm1.mininput\_temperature)$ | s·mol/kg | Mobility, zy component | Domain 1  |         |
| npe.um_cBeadxz | $npe.D\_cBeadxz/(R\_const*npe.cdm1.mininput\_temperature)$ | s·mol/kg | Mobility, xz component | Domain 1  |         |

| Name           | Expression                                                     | Unit     | Description            | Selection | Details |
|----------------|----------------------------------------------------------------|----------|------------------------|-----------|---------|
| npe.um_cBeadyz | $npe.D\_cBeadyz / (R\_const * npe.cdm1.mininput\_temperature)$ | s·mol/kg | Mobility, yz component | Domain 1  |         |
| npe.um_cBeadzz | $npe.D\_cBeadzz / (R\_const * npe.cdm1.mininput\_temperature)$ | s·mol/kg | Mobility, zz component | Domain 1  |         |
| npe.z_cBead    | -1                                                             | 1        | Charge number          | Domain 1  |         |
| npe.um_cKxx    | $npe.D\_cKxx / (R\_const * npe.cdm1.mininput\_temperature)$    | s·mol/kg | Mobility, xx component | Domain 1  |         |
| npe.um_cKyx    | $npe.D\_cKyx / (R\_const * npe.cdm1.mininput\_temperature)$    | s·mol/kg | Mobility, yx component | Domain 1  |         |
| npe.um_cKzx    | $npe.D\_cKzx / (R\_const * npe.cdm1.mininput\_temperature)$    | s·mol/kg | Mobility, zx component | Domain 1  |         |
| npe.um_cKxy    | $npe.D\_cKxy / (R\_const * npe.cdm1.mininput\_temperature)$    | s·mol/kg | Mobility, xy component | Domain 1  |         |
| npe.um_cKyy    | $npe.D\_cKyy / (R\_const * npe.cdm1.mininput\_temperature)$    | s·mol/kg | Mobility, yy component | Domain 1  |         |
| npe.um_cKzy    | $npe.D\_cKzy / (R\_const * npe.cdm1.mininput\_temperature)$    | s·mol/kg | Mobility, zy component | Domain 1  |         |
| npe.um_cKxz    | $npe.D\_cKxz / (R\_const * npe.cdm1.mininput\_temperature)$    | s·mol/kg | Mobility, xz component | Domain 1  |         |
| npe.um_cKyz    | $npe.D\_cKyz / (R\_const * npe.cdm1.mininput\_temperature)$    | s·mol/kg | Mobility, yz component | Domain 1  |         |
| npe.um_cKzz    | $npe.D\_cKzz / (R\_const * npe.cdm1.mininput\_temperature)$    | s·mol/kg | Mobility, zz component | Domain 1  |         |

| Name         | Expression                                         | Unit              | Description            | Selection | Details |
|--------------|----------------------------------------------------|-------------------|------------------------|-----------|---------|
|              | 1.minput_temperature)                              | g                 | component              |           |         |
| npe.z_cK     | 1                                                  | 1                 | Charge number          | Domain 1  |         |
| npe.um_cClxx | npe.D_cClxx/(R_const*npe.cd m1.minput_temperature) | s·mol/kg          | Mobility, xx component | Domain 1  |         |
| npe.um_cClyx | npe.D_cClyx/(R_const*npe.cd m1.minput_temperature) | s·mol/kg          | Mobility, yx component | Domain 1  |         |
| npe.um_cClzx | npe.D_cClzx/(R_const*npe.cd m1.minput_temperature) | s·mol/kg          | Mobility, zx component | Domain 1  |         |
| npe.um_cClxy | npe.D_cClxy/(R_const*npe.cd m1.minput_temperature) | s·mol/kg          | Mobility, xy component | Domain 1  |         |
| npe.um_cClyy | npe.D_cClyy/(R_const*npe.cd m1.minput_temperature) | s·mol/kg          | Mobility, yy component | Domain 1  |         |
| npe.um_cClzy | npe.D_cClzy/(R_const*npe.cd m1.minput_temperature) | s·mol/kg          | Mobility, zy component | Domain 1  |         |
| npe.um_cClxz | npe.D_cClxz/(R_const*npe.cd m1.minput_temperature) | s·mol/kg          | Mobility, xz component | Domain 1  |         |
| npe.um_cClyz | npe.D_cClyz/(R_const*npe.cd m1.minput_temperature) | s·mol/kg          | Mobility, yz component | Domain 1  |         |
| npe.um_cClzz | npe.D_cClzz/(R_const*npe.cd m1.minput_temperature) | s·mol/kg          | Mobility, zz component | Domain 1  |         |
| npe.z_cCl    | -1                                                 | 1                 | Charge number          | Domain 1  |         |
| npe.Dav_ch3  | 0.5*(npe.D_ch                                      | m <sup>2</sup> /s | Average                | Domain 1  |         |



| Name              | Expression                                                                                         | Unit                | Description                       | Selection | Details     |
|-------------------|----------------------------------------------------------------------------------------------------|---------------------|-----------------------------------|-----------|-------------|
| O                 | $3O_{xx} + npe.D\_cH3O_{yy}$                                                                       |                     | diffusion coefficient             |           |             |
| npe.Dav_cOH       | $0.5*(npe.D\_cOH_{xx} + npe.D\_cOH_{yy})$                                                          | $m^2/s$             | Average diffusion coefficient     | Domain 1  |             |
| npe.Dav_cBead     | $0.5*(npe.D\_cBead_{xx} + npe.D\_cBead_{yy})$                                                      | $m^2/s$             | Average diffusion coefficient     | Domain 1  |             |
| npe.Dav_cK        | $0.5*(npe.D\_cK_{xx} + npe.D\_cK_{yy})$                                                            | $m^2/s$             | Average diffusion coefficient     | Domain 1  |             |
| npe.Dav_cCl       | $0.5*(npe.D\_cCl_{xx} + npe.D\_cCl_{yy})$                                                          | $m^2/s$             | Average diffusion coefficient     | Domain 1  |             |
| npe.tflux_cH3Ox   | $npe.dflux\_cH3Ox + npe.cflux\_cH3Ox + npe.mflux\_cH3Ox$                                           | $mol/(m^2 \cdot s)$ | Total flux, x component           | Domain 1  | + operation |
| npe.tflux_cH3Oy   | $npe.dflux\_cH3Oy + npe.cflux\_cH3Oy + npe.mflux\_cH3Oy$                                           | $mol/(m^2 \cdot s)$ | Total flux, y component           | Domain 1  | + operation |
| npe.tflux_cH3Oz   | $npe.dflux\_cH3Oz + npe.cflux\_cH3Oz + npe.mflux\_cH3Oz$                                           | $mol/(m^2 \cdot s)$ | Total flux, z component           | Domain 1  | + operation |
| npe.dfluxMag_cH3O | $\sqrt{npe.dflux\_cH3Ox^2 + npe.dflux\_cH3Oy^2 + npe.dflux\_cH3Oz^2}$                              | $mol/(m^2 \cdot s)$ | Diffusive flux magnitude          | Domain 1  |             |
| npe.tfluxMag_cH3O | $\sqrt{npe.tflux\_cH3Ox^2 + npe.tflux\_cH3Oy^2 + npe.tflux\_cH3Oz^2}$                              | $mol/(m^2 \cdot s)$ | Total flux magnitude              | Domain 1  |             |
| npe.mflux_cH3Ox   | $npe.z\_cH3O * F\_const * cH3O * (-npe.um\_cH3Ox * d(npe.V, x) - npe.um\_cH3Ox * y * d(npe.V, y))$ | $mol/(m^2 \cdot s)$ | Electrophoretic flux, x component | Domain 1  |             |
| npe.mflux_cH3Oy   | $npe.z\_cH3O * F\_const * cH3O * (-npe.um\_cH3Oy * d(npe.V, x) - npe.um\_cH3Oy * x * d(npe.V, y))$ | $mol/(m^2 \cdot s)$ | Electrophoretic flux, y component | Domain 1  |             |

| Name             | Expression                                                                         | Unit                    | Description                       | Selection | Details     |
|------------------|------------------------------------------------------------------------------------|-------------------------|-----------------------------------|-----------|-------------|
|                  | $npe.um\_CH3Oyx*d(npe.V,x)-npe.um\_CH3Oyy*d(npe.V,y)$                              |                         | component                         |           |             |
| npe.mflux_cH3Oz  | $npe.z\_CH3O*F\_const*cH3O*(-npe.um\_CH3Ozx*d(npe.V,x)-npe.um\_CH3Ozy*d(npe.V,y))$ | mol/(m <sup>2</sup> .s) | Electrophoretic flux, z component | Domain 1  |             |
| npe.tflux_cOHx   | $npe.dflux\_cOHx+npe.cflux\_cOHx+npe.mflux\_cOHx$                                  | mol/(m <sup>2</sup> .s) | Total flux, x component           | Domain 1  | + operation |
| npe.tflux_cOHy   | $npe.dflux\_cOHy+npe.cflux\_cOHy+npe.mflux\_cOHy$                                  | mol/(m <sup>2</sup> .s) | Total flux, y component           | Domain 1  | + operation |
| npe.tflux_cOHz   | $npe.dflux\_cOHz+npe.cflux\_cOHz+npe.mflux\_cOHz$                                  | mol/(m <sup>2</sup> .s) | Total flux, z component           | Domain 1  | + operation |
| npe.dfluxMag_cOH | $\sqrt{npe.dflux\_cOHx^2+npe.dflux\_cOHy^2+npe.dflux\_cOHx^2}$                     | mol/(m <sup>2</sup> .s) | Diffusive flux magnitude          | Domain 1  |             |
| npe.tfluxMag_cOH | $\sqrt{npe.tflux\_cOHx^2+npe.tflux\_cOHy^2+npe.tflux\_cOHx^2}$                     | mol/(m <sup>2</sup> .s) | Total flux magnitude              | Domain 1  |             |
| npe.mflux_cOHx   | $npe.z\_cOH*F\_const*cOH*(-npe.um\_cOHxx*d(npe.V,x)-npe.um\_cOHxy*d(npe.V,y))$     | mol/(m <sup>2</sup> .s) | Electrophoretic flux, x component | Domain 1  |             |
| npe.mflux_cOHy   | $npe.z\_cOH*F\_const*cOH*(-npe.um\_cOHyx*d(npe.V,x)-npe.um\_cOHyy*d(npe.V,y))$     | mol/(m <sup>2</sup> .s) | Electrophoretic flux, y component | Domain 1  |             |

| Name               | Expression                                                                                       | Unit                    | Description                       | Selection | Details     |
|--------------------|--------------------------------------------------------------------------------------------------|-------------------------|-----------------------------------|-----------|-------------|
| npe.mflux_cOH      | $npe.z\_cOH * F\_const * cOH * (-npe.um\_cOHx * d(npe.V,x) - npe.um\_cOHy * d(npe.V,y))$         | mol/(m <sup>2</sup> .s) | Electrophoretic flux, z component | Domain 1  |             |
| npe.tflux_cBeadx   | $npe.dflux\_cBeadx + npe.cflux\_cBeadx + npe.mflux\_cBeadx$                                      | mol/(m <sup>2</sup> .s) | Total flux, x component           | Domain 1  | + operation |
| npe.tflux_cBeady   | $npe.dflux\_cBeady + npe.cflux\_cBeady + npe.mflux\_cBeady$                                      | mol/(m <sup>2</sup> .s) | Total flux, y component           | Domain 1  | + operation |
| npe.tflux_cBeadz   | $npe.dflux\_cBeadz + npe.cflux\_cBeadz + npe.mflux\_cBeadz$                                      | mol/(m <sup>2</sup> .s) | Total flux, z component           | Domain 1  | + operation |
| npe.dfluxMag_cBead | $\sqrt{(npe.dflux\_cBeadx^2 + npe.dflux\_cBeady^2 + npe.dflux\_cBeadz^2)}$                       | mol/(m <sup>2</sup> .s) | Diffusive flux magnitude          | Domain 1  |             |
| npe.tfluxMag_cBead | $\sqrt{(npe.tflux\_cBeadx^2 + npe.tflux\_cBeady^2 + npe.tflux\_cBeadz^2)}$                       | mol/(m <sup>2</sup> .s) | Total flux magnitude              | Domain 1  |             |
| npe.mflux_cBeadx   | $npe.z\_cBead * F\_const * cBead * (-npe.um\_cBeadx * d(npe.V,x) - npe.um\_cBeady * d(npe.V,y))$ | mol/(m <sup>2</sup> .s) | Electrophoretic flux, x component | Domain 1  |             |
| npe.mflux_cBeady   | $npe.z\_cBead * F\_const * cBead * (-npe.um\_cBeady * d(npe.V,x) - npe.um\_cBeadx * d(npe.V,y))$ | mol/(m <sup>2</sup> .s) | Electrophoretic flux, y component | Domain 1  |             |
| npe.mflux_cBeadz   | $npe.z\_cBead * F\_const * cBead * (-npe.um\_cBeadz * d(npe.V,x) - npe.um\_cBeadz * d(npe.V,y))$ | mol/(m <sup>2</sup> .s) | Electrophoretic flux, z component | Domain 1  |             |

| Name            | Expression                                                                             | Unit                    | Description                       | Selection | Details     |
|-----------------|----------------------------------------------------------------------------------------|-------------------------|-----------------------------------|-----------|-------------|
|                 | $npe.um\_cBead_{zx} * d(npe.V,x) - npe.um\_cBead_{zy} * d(npe.V,y)$                    |                         |                                   |           |             |
| npe.tflux_cKx   | $npe.dflux\_cKx + npe.cflux\_cKx + npe.mflux\_cKx$                                     | mol/(m <sup>2</sup> .s) | Total flux, x component           | Domain 1  | + operation |
| npe.tflux_cKy   | $npe.dflux\_cKy + npe.cflux\_cKy + npe.mflux\_cKy$                                     | mol/(m <sup>2</sup> .s) | Total flux, y component           | Domain 1  | + operation |
| npe.tflux_cKz   | $npe.dflux\_cKz + npe.cflux\_cKz + npe.mflux\_cKz$                                     | mol/(m <sup>2</sup> .s) | Total flux, z component           | Domain 1  | + operation |
| npe.dfluxMag_cK | $\sqrt{npe.dflux\_cKx^2 + npe.dflux\_cKy^2 + npe.dflux\_cKz^2}$                        | mol/(m <sup>2</sup> .s) | Diffusive flux magnitude          | Domain 1  |             |
| npe.tfluxMag_cK | $\sqrt{npe.tflux\_cKx^2 + npe.tflux\_cKy^2 + npe.tflux\_cKz^2}$                        | mol/(m <sup>2</sup> .s) | Total flux magnitude              | Domain 1  |             |
| npe.mflux_cKx   | $npe.z\_cK * F\_const * cK * (-npe.um\_cKxx * d(npe.V,x) - npe.um\_cKxy * d(npe.V,y))$ | mol/(m <sup>2</sup> .s) | Electrophoretic flux, x component | Domain 1  |             |
| npe.mflux_cKy   | $npe.z\_cK * F\_const * cK * (-npe.um\_cKyx * d(npe.V,x) - npe.um\_cKyy * d(npe.V,y))$ | mol/(m <sup>2</sup> .s) | Electrophoretic flux, y component | Domain 1  |             |
| npe.mflux_cKz   | $npe.z\_cK * F\_const * cK * (-npe.um\_cKzx * d(npe.V,x) - npe.um\_cKzy * d(npe.V,y))$ | mol/(m <sup>2</sup> .s) | Electrophoretic flux, z component | Domain 1  |             |
| npe.tflux_cClx  | $npe.dflux\_cClx + npe.cflux\_cClx + npe.mflux\_cClx$                                  | mol/(m <sup>2</sup> .s) | Total flux, x component           | Domain 1  | + operation |

| Name             | Expression                                                                                 | Unit                    | Description                       | Selection | Details     |
|------------------|--------------------------------------------------------------------------------------------|-------------------------|-----------------------------------|-----------|-------------|
| npe.tflux_cCly   | $npe.dflux\_cCly + npe.cflux\_cCly + npe.mflux\_cCly$                                      | mol/(m <sup>2</sup> .s) | Total flux, y component           | Domain 1  | + operation |
| npe.tflux_cClz   | $npe.dflux\_cClz + npe.cflux\_cClz + npe.mflux\_cClz$                                      | mol/(m <sup>2</sup> .s) | Total flux, z component           | Domain 1  | + operation |
| npe.dfluxMag_cCl | $\sqrt{(npe.dflux\_cClx^2 + npe.dflux\_cCly^2 + npe.dflux\_cClz^2)}$                       | mol/(m <sup>2</sup> .s) | Diffusive flux magnitude          | Domain 1  |             |
| npe.tfluxMag_cCl | $\sqrt{(npe.tflux\_cClx^2 + npe.tflux\_cCly^2 + npe.tflux\_cClz^2)}$                       | mol/(m <sup>2</sup> .s) | Total flux magnitude              | Domain 1  |             |
| npe.mflux_cClx   | $npe.z\_cCl * F\_const * cCl * (-npe.um\_cClxx * d(npe.V,x) - npe.um\_cClxy * d(npe.V,y))$ | mol/(m <sup>2</sup> .s) | Electrophoretic flux, x component | Domain 1  |             |
| npe.mflux_cCly   | $npe.z\_cCl * F\_const * cCl * (-npe.um\_cClyx * d(npe.V,x) - npe.um\_cClyy * d(npe.V,y))$ | mol/(m <sup>2</sup> .s) | Electrophoretic flux, y component | Domain 1  |             |
| npe.mflux_cClz   | $npe.z\_cCl * F\_const * cCl * (-npe.um\_cClzx * d(npe.V,x) - npe.um\_cClzy * d(npe.V,y))$ | mol/(m <sup>2</sup> .s) | Electrophoretic flux, z component | Domain 1  |             |
| npe.u            | model.input.u1                                                                             | m/s                     | Velocity field, x component       | Domain 1  | Meta        |
| npe.v            | model.input.u2                                                                             | m/s                     | Velocity field, y component       | Domain 1  | Meta        |
| npe.w            | model.input.u3                                                                             | m/s                     | Velocity field, z component       | Domain 1  | Meta        |
| npe.cflux_cH3Ox  | cH3O*npe.u                                                                                 | mol/(m <sup>2</sup> .s) | Convective flux, x component      | Domain 1  |             |

| Name               | Expression                                                     | Unit                    | Description                  | Selection | Details |
|--------------------|----------------------------------------------------------------|-------------------------|------------------------------|-----------|---------|
| npe.cflux_cH3Oy    | cH3O*npe.v                                                     | mol/(m <sup>2</sup> .s) | Convective flux, y component | Domain 1  |         |
| npe.cflux_cH3Oz    | cH3O*npe.w                                                     | mol/(m <sup>2</sup> .s) | Convective flux, z component | Domain 1  |         |
| npe.cfluxMag_cH3O  | sqrt(npe.cflux_cH3Ox^2+npe.cflux_cH3Oy^2+npe.cflux_cH3Oz^2)    | mol/(m <sup>2</sup> .s) | Convective flux magnitude    | Domain 1  |         |
| npe.cflux_cOHx     | cOH*npe.u                                                      | mol/(m <sup>2</sup> .s) | Convective flux, x component | Domain 1  |         |
| npe.cflux_cOHy     | cOH*npe.v                                                      | mol/(m <sup>2</sup> .s) | Convective flux, y component | Domain 1  |         |
| npe.cflux_cOHz     | cOH*npe.w                                                      | mol/(m <sup>2</sup> .s) | Convective flux, z component | Domain 1  |         |
| npe.cfluxMag_cOH   | sqrt(npe.cflux_cOHx^2+npe.cflux_cOHy^2+npe.cflux_cOHz^2)       | mol/(m <sup>2</sup> .s) | Convective flux magnitude    | Domain 1  |         |
| npe.cflux_cBeadx   | cBead*npe.u                                                    | mol/(m <sup>2</sup> .s) | Convective flux, x component | Domain 1  |         |
| npe.cflux_cBeady   | cBead*npe.v                                                    | mol/(m <sup>2</sup> .s) | Convective flux, y component | Domain 1  |         |
| npe.cflux_cBeadz   | cBead*npe.w                                                    | mol/(m <sup>2</sup> .s) | Convective flux, z component | Domain 1  |         |
| npe.cfluxMag_cBead | sqrt(npe.cflux_cBeadx^2+npe.cflux_cBeady^2+npe.cflux_cBeadz^2) | mol/(m <sup>2</sup> .s) | Convective flux magnitude    | Domain 1  |         |
| npe.cflux_cKx      | cK*npe.u                                                       | mol/(m <sup>2</sup> .s) | Convective flux, x component | Domain 1  |         |
| npe.cflux_cKy      | cK*npe.v                                                       | mol/(m                  | Convective                   | Domain 1  |         |

| Name             | Expression                                                                                             | Unit                  | Description                  | Selection | Details |
|------------------|--------------------------------------------------------------------------------------------------------|-----------------------|------------------------------|-----------|---------|
|                  |                                                                                                        | $^2 \cdot s$ )        | flux, y component            |           |         |
| npe.cflux_cKz    | $cK * npe.w$                                                                                           | $mol / (m^2 \cdot s)$ | Convective flux, z component | Domain 1  |         |
| npe.cfluxMag_cK  | $\sqrt{npe.cflux\_cKx^2 + npe.cflux\_cKy^2 + npe.cflux\_cKz^2}$                                        | $mol / (m^2 \cdot s)$ | Convective flux magnitude    | Domain 1  |         |
| npe.cflux_cClx   | $cCl * npe.u$                                                                                          | $mol / (m^2 \cdot s)$ | Convective flux, x component | Domain 1  |         |
| npe.cflux_cCl y  | $cCl * npe.v$                                                                                          | $mol / (m^2 \cdot s)$ | Convective flux, y component | Domain 1  |         |
| npe.cflux_cCl z  | $cCl * npe.w$                                                                                          | $mol / (m^2 \cdot s)$ | Convective flux, z component | Domain 1  |         |
| npe.cfluxMag_cCl | $\sqrt{npe.cflux\_cClx^2 + npe.cflux\_cCly^2 + npe.cflux\_cClz^2}$                                     | $mol / (m^2 \cdot s)$ | Convective flux magnitude    | Domain 1  |         |
| npe.dflux_ch3Ox  | $-npe.D\_ch3Oxx * npe.grad\_ch3Ox - npe.D\_ch3Oxy * npe.grad\_ch3Oy - npe.D\_ch3Oxz * npe.grad\_ch3Oz$ | $mol / (m^2 \cdot s)$ | Diffusive flux, x component  | Domain 1  |         |
| npe.dflux_ch3Oy  | $-npe.D\_ch3Oyx * npe.grad\_ch3Ox - npe.D\_ch3Oyy * npe.grad\_ch3Oy - npe.D\_ch3Oyz * npe.grad\_ch3Oz$ | $mol / (m^2 \cdot s)$ | Diffusive flux, y component  | Domain 1  |         |
| npe.dflux_ch3Oz  | $-npe.D\_ch3Ozx * npe.grad\_ch3Ox - npe.D\_ch3Ozy * npe.grad\_ch3Oy - npe.D\_ch3Ozz * npe.grad\_ch3Oz$ | $mol / (m^2 \cdot s)$ | Diffusive flux, z component  | Domain 1  |         |

| Name           | Expression                                                                                             | Unit                    | Description                         | Selection | Details     |
|----------------|--------------------------------------------------------------------------------------------------------|-------------------------|-------------------------------------|-----------|-------------|
|                | *npe.grad_cH3Ox-<br>npe.D_cH3Ozy<br>*npe.grad_cH3Oy-<br>npe.D_cH3Ozz<br>*npe.grad_cH3Oz                |                         |                                     |           |             |
| npe.grad_cH3Ox | cH3Ox                                                                                                  | mol/m <sup>4</sup>      | Concentration gradient, x component | Domain 1  |             |
| npe.grad_cH3Oy | cH3Oy                                                                                                  | mol/m <sup>4</sup>      | Concentration gradient, y component | Domain 1  |             |
| npe.grad_cH3Oz | 0                                                                                                      | mol/m <sup>4</sup>      | Concentration gradient, z component | Domain 1  |             |
| npe.ctemp      | -<br>cH3O*npe.z_cH3O-<br>cOH*npe.z_cOH-<br>cBead*npe.z_cBead-<br>cK*npe.z_cK                           | mol/m <sup>3</sup>      | Concentration                       | Domain 1  | + operation |
| npe.dflux_cOHx | -<br>npe.D_cOHxx*<br>npe.grad_cOHx-<br>npe.D_cOHxy*<br>npe.grad_cOHy-<br>npe.D_cOHxz*<br>npe.grad_cOHz | mol/(m <sup>2</sup> .s) | Diffusive flux, x component         | Domain 1  |             |
| npe.dflux_cOHy | -<br>npe.D_cOHyx*<br>npe.grad_cOHx-<br>npe.D_cOHyy*<br>npe.grad_cOHy-<br>npe.D_cOHyz*<br>npe.grad_cOHz | mol/(m <sup>2</sup> .s) | Diffusive flux, y component         | Domain 1  |             |



| Name                         | Expression                                                                                                                                                                                      | Unit                    | Description                         | Selection | Details |
|------------------------------|-------------------------------------------------------------------------------------------------------------------------------------------------------------------------------------------------|-------------------------|-------------------------------------|-----------|---------|
| npe.dflux_cOH <sub>z</sub>   | -<br>npe.D_cOH <sub>zx</sub> *<br>npe.grad_cOH <sub>x</sub> -<br>npe.D_cOH <sub>zy</sub> *<br>npe.grad_cOH <sub>y</sub> -<br>npe.D_cOH <sub>zz</sub> *<br>npe.grad_cOH <sub>z</sub>             | mol/(m <sup>2</sup> .s) | Diffusive flux, z component         | Domain 1  |         |
| npe.grad_cOH <sub>x</sub>    | cOH <sub>x</sub>                                                                                                                                                                                | mol/m <sup>4</sup>      | Concentration gradient, x component | Domain 1  |         |
| npe.grad_cOH <sub>y</sub>    | cOH <sub>y</sub>                                                                                                                                                                                | mol/m <sup>4</sup>      | Concentration gradient, y component | Domain 1  |         |
| npe.grad_cOH <sub>z</sub>    | 0                                                                                                                                                                                               | mol/m <sup>4</sup>      | Concentration gradient, z component | Domain 1  |         |
| npe.dflux_cBead <sub>x</sub> | -<br>npe.D_cBead <sub>xx</sub> *<br>npe.grad_cBead <sub>x</sub> -<br>npe.D_cBead <sub>xy</sub> *<br>npe.grad_cBead <sub>y</sub> -<br>npe.D_cBead <sub>xz</sub> *<br>npe.grad_cBead <sub>z</sub> | mol/(m <sup>2</sup> .s) | Diffusive flux, x component         | Domain 1  |         |
| npe.dflux_cBead <sub>y</sub> | -<br>npe.D_cBead <sub>yx</sub> *<br>npe.grad_cBead <sub>x</sub> -<br>npe.D_cBead <sub>yy</sub> *<br>npe.grad_cBead <sub>y</sub> -<br>npe.D_cBead <sub>yz</sub> *<br>npe.grad_cBead <sub>z</sub> | mol/(m <sup>2</sup> .s) | Diffusive flux, y component         | Domain 1  |         |
| npe.dflux_cBead <sub>z</sub> | -<br>npe.D_cBead <sub>zx</sub> *<br>npe.grad_cBead <sub>x</sub> -<br>npe.D_cBead <sub>zy</sub> *<br>npe.grad_cBead <sub>y</sub>                                                                 | mol/(m <sup>2</sup> .s) | Diffusive flux, z component         | Domain 1  |         |

| Name                | Expression                                                                                       | Unit                    | Description                               | Selection | Details |
|---------------------|--------------------------------------------------------------------------------------------------|-------------------------|-------------------------------------------|-----------|---------|
|                     | ady-<br>npe.D_cBeadzz<br>*npe.grad_cBe<br>adz                                                    |                         |                                           |           |         |
| npe.grad_cBe<br>adx | cBeadx                                                                                           | mol/m <sup>4</sup>      | Concentration<br>gradient, x<br>component | Domain 1  |         |
| npe.grad_cBe<br>ady | cBeady                                                                                           | mol/m <sup>4</sup>      | Concentration<br>gradient, y<br>component | Domain 1  |         |
| npe.grad_cBe<br>adz | 0                                                                                                | mol/m <sup>4</sup>      | Concentration<br>gradient, z<br>component | Domain 1  |         |
| npe.dflux_cKx       | -<br>npe.D_cKxx*np<br>e.grad_cKx-<br>npe.D_cKxy*np<br>e.grad_cKy-<br>npe.D_cKxz*np<br>e.grad_cKz | mol/(m <sup>2</sup> .s) | Diffusive flux,<br>x component            | Domain 1  |         |
| npe.dflux_cKy       | -<br>npe.D_cKyx*np<br>e.grad_cKx-<br>npe.D_cKyy*np<br>e.grad_cKy-<br>npe.D_cKyz*np<br>e.grad_cKz | mol/(m <sup>2</sup> .s) | Diffusive flux,<br>y component            | Domain 1  |         |
| npe.dflux_cKz       | -<br>npe.D_cKzx*np<br>e.grad_cKx-<br>npe.D_cKzy*np<br>e.grad_cKy-<br>npe.D_cKzz*np<br>e.grad_cKz | mol/(m <sup>2</sup> .s) | Diffusive flux,<br>z component            | Domain 1  |         |
| npe.grad_cKx        | cKx                                                                                              | mol/m <sup>4</sup>      | Concentration<br>gradient, x<br>component | Domain 1  |         |
| npe.grad_cKy        | cKy                                                                                              | mol/m <sup>4</sup>      | Concentration<br>gradient, y<br>component | Domain 1  |         |
| npe.grad_cKz        | 0                                                                                                | mol/m <sup>4</sup>      | Concentration<br>gradient, z<br>component | Domain 1  |         |
| npe.dflux_cCl       | -                                                                                                | mol/(m                  | Diffusive flux,                           | Domain 1  |         |

| Name               | Expression                                                                                                                                                                                                                                                           | Unit                       | Description                                     | Selection | Details         |
|--------------------|----------------------------------------------------------------------------------------------------------------------------------------------------------------------------------------------------------------------------------------------------------------------|----------------------------|-------------------------------------------------|-----------|-----------------|
| x                  | npe.D_cClxx*n<br>pe.grad_cClx-<br>npe.D_cClxy*n<br>pe.grad_cCly-<br>npe.D_cClxz*n<br>pe.grad_cClz                                                                                                                                                                    | <sup>2</sup> .s)           | x component                                     |           |                 |
| npe.dflux_cCl<br>y | -<br>npe.D_cClyx*n<br>pe.grad_cClx-<br>npe.D_cClyy*n<br>pe.grad_cCly-<br>npe.D_cClyz*n<br>pe.grad_cClz                                                                                                                                                               | mol/(m<br><sup>2</sup> .s) | Diffusive flux,<br>y component                  | Domain 1  |                 |
| npe.dflux_cCl<br>z | -<br>npe.D_cClzx*n<br>pe.grad_cClx-<br>npe.D_cClzy*n<br>pe.grad_cCly-<br>npe.D_cClzz*n<br>pe.grad_cClz                                                                                                                                                               | mol/(m<br><sup>2</sup> .s) | Diffusive flux,<br>z component                  | Domain 1  |                 |
| npe.grad_cCl<br>x  | d(cCl,x)                                                                                                                                                                                                                                                             | mol/m <sup>4</sup>         | Concentration<br>gradient, x<br>component       | Domain 1  |                 |
| npe.grad_cCl<br>y  | d(cCl,y)                                                                                                                                                                                                                                                             | mol/m <sup>4</sup>         | Concentration<br>gradient, y<br>component       | Domain 1  |                 |
| npe.grad_cCl<br>z  | 0                                                                                                                                                                                                                                                                    | mol/m <sup>4</sup>         | Concentration<br>gradient, z<br>component       | Domain 1  |                 |
| npe.kappa0x<br>x   | cH3O*npe.um_<br>cH3Oxx*(npe.z<br>_cH3O*F_const<br>)^2+cOH*npe.<br>um_cOHxx*(np<br>e.z_cOH*F_con<br>st)^2+cBead*n<br>pe.um_cBeadx<br>x*(npe.z_cBead<br>*F_const)^2+c<br>K*npe.um_cKx<br>x*(npe.z_cK*F_<br>const)^2+cCl*<br>npe.um_cClxx*<br>(npe.z_cCl*F_c<br>onst)^2 | S/m                        | Electrolyte<br>conductivity,<br>xx<br>component | Domain 1  | + operati<br>on |

| Name         | Expression                                                                                                                                                                                                                | Unit | Description                            | Selection | Details     |
|--------------|---------------------------------------------------------------------------------------------------------------------------------------------------------------------------------------------------------------------------|------|----------------------------------------|-----------|-------------|
| npe.kappa0yx | $cH3O*npe.um\_cH3Oyx*(npe.z\_cH3O*F\_const)^2+cOH*npe.um\_cOHyx*(npe.z\_cOH*F\_const)^2+cBead*npe.um\_cBeadyx*(npe.z\_cBead*F\_const)^2+cK*npe.um\_cKyx*(npe.z\_cK*F\_const)^2+cCl*npe.um\_cClxy*(npe.z\_cCl*F\_const)^2$ | S/m  | Electrolyte conductivity, yx component | Domain 1  | + operation |
| npe.kappa0zx | $cH3O*npe.um\_cH3Ozx*(npe.z\_cH3O*F\_const)^2+cOH*npe.um\_cOHzx*(npe.z\_cOH*F\_const)^2+cBead*npe.um\_cBeadzx*(npe.z\_cBead*F\_const)^2+cK*npe.um\_cKzx*(npe.z\_cK*F\_const)^2+cCl*npe.um\_cClzx*(npe.z\_cCl*F\_const)^2$ | S/m  | Electrolyte conductivity, zx component | Domain 1  | + operation |
| npe.kappa0xy | $cH3O*npe.um\_cH3Oxy*(npe.z\_cH3O*F\_const)^2+cOH*npe.um\_cOHxy*(npe.z\_cOH*F\_const)^2+cBead*npe.um\_cBeadxy*(npe.z\_cBead*F\_const)^2+cK*npe.um\_cKxy*(npe.z\_cK*F\_const)^2+cCl*npe.um\_cClxy*(npe.z\_cCl*F\_const)^2$ | S/m  | Electrolyte conductivity, xy component | Domain 1  | + operation |

| Name         | Expression                                                                                                                                                                                                               | Unit | Description                            | Selection | Details     |
|--------------|--------------------------------------------------------------------------------------------------------------------------------------------------------------------------------------------------------------------------|------|----------------------------------------|-----------|-------------|
|              | onst)^2                                                                                                                                                                                                                  |      |                                        |           |             |
| npe.kappa0y  | $cH3O*npe.um\_cH3Oy*(npe.z\_cH3O*F\_const)^2+cOH*npe.um\_cOHyy*(npe.z\_cOH*F\_const)^2+cBead*npe.um\_cBeady*(npe.z\_cBead*F\_const)^2+cK*npe.um\_cKy*(npe.z\_cK*F\_const)^2+cCl*npe.um\_cCly*(npe.z\_cCl*F\_const)^2$    | S/m  | Electrolyte conductivity, yy component | Domain 1  | + operation |
| npe.kappa0z  | $cH3O*npe.um\_cH3Ozy*(npe.z\_cH3O*F\_const)^2+cOH*npe.um\_cOHzy*(npe.z\_cOH*F\_const)^2+cBead*npe.um\_cBeadz*(npe.z\_cBead*F\_const)^2+cK*npe.um\_cKzy*(npe.z\_cK*F\_const)^2+cCl*npe.um\_cClzy*(npe.z\_cCl*F\_const)^2$ | S/m  | Electrolyte conductivity, zy component | Domain 1  | + operation |
| npe.kappa0xz | $cH3O*npe.um\_cH3Oxz*(npe.z\_cH3O*F\_const)^2+cOH*npe.um\_cOHxz*(npe.z\_cOH*F\_const)^2+cBead*npe.um\_cBeadx*(npe.z\_cBead*F\_const)^2+cK*npe.um\_cKxz*(npe.z\_cK*F\_const)^2+cCl*$                                      | S/m  | Electrolyte conductivity, xz component | Domain 1  | + operation |

| Name         | Expression                                                                                                                                                                                                                | Unit | Description                            | Selection | Details     |
|--------------|---------------------------------------------------------------------------------------------------------------------------------------------------------------------------------------------------------------------------|------|----------------------------------------|-----------|-------------|
|              | $npe.um\_cClxz^*(npe.z\_cCl*F\_const)^2$                                                                                                                                                                                  |      |                                        |           |             |
| npe.kappa0yz | $cH3O*npe.um\_cH3Oyz*(npe.z\_cH3O*F\_const)^2+cOH*npe.um\_cOHyz*(npe.z\_cOH*F\_const)^2+cBead*npe.um\_cBeadyz*(npe.z\_cBead*F\_const)^2+cK*npe.um\_cKyz*(npe.z\_cK*F\_const)^2+cCl*npe.um\_cClyz*(npe.z\_cCl*F\_const)^2$ | S/m  | Electrolyte conductivity, yz component | Domain 1  | + operation |
| npe.kappa0zz | $cH3O*npe.um\_cH3Ozz*(npe.z\_cH3O*F\_const)^2+cOH*npe.um\_cOHzz*(npe.z\_cOH*F\_const)^2+cBead*npe.um\_cBeadzz*(npe.z\_cBead*F\_const)^2+cK*npe.um\_cKzz*(npe.z\_cK*F\_const)^2+cCl*npe.um\_cClzz*(npe.z\_cCl*F\_const)^2$ | S/m  | Electrolyte conductivity, zz component | Domain 1  | + operation |
| npe.kappaxx  | npe.kappa0xx                                                                                                                                                                                                              | S/m  | Electrolyte conductivity, xx component | Domain 1  |             |
| npe.kappayx  | npe.kappa0yx                                                                                                                                                                                                              | S/m  | Electrolyte conductivity, yx component | Domain 1  |             |
| npe.kappazx  | npe.kappa0zx                                                                                                                                                                                                              | S/m  | Electrolyte conductivity, zx component | Domain 1  |             |

| Name        | Expression                                                                                                                                                                                                                    | Unit             | Description                            | Selection | Details     |
|-------------|-------------------------------------------------------------------------------------------------------------------------------------------------------------------------------------------------------------------------------|------------------|----------------------------------------|-----------|-------------|
|             |                                                                                                                                                                                                                               |                  | component                              |           |             |
| npe.kappaxy | npe.kappa0xy                                                                                                                                                                                                                  | S/m              | Electrolyte conductivity, xy component | Domain 1  |             |
| npe.kappayy | npe.kappa0yy                                                                                                                                                                                                                  | S/m              | Electrolyte conductivity, yy component | Domain 1  |             |
| npe.kappazy | npe.kappa0zy                                                                                                                                                                                                                  | S/m              | Electrolyte conductivity, zy component | Domain 1  |             |
| npe.kappaxz | npe.kappa0xz                                                                                                                                                                                                                  | S/m              | Electrolyte conductivity, xz component | Domain 1  |             |
| npe.kappayz | npe.kappa0yz                                                                                                                                                                                                                  | S/m              | Electrolyte conductivity, yz component | Domain 1  |             |
| npe.kappazz | npe.kappa0zz                                                                                                                                                                                                                  | S/m              | Electrolyte conductivity, zz component | Domain 1  |             |
| npe.J0x     | $F\_const*(npe.z\_cH3O*(-npe.D\_cH3Oxx*npe.grad\_cH3Ox-npe.D\_cH3Oxy*npe.grad\_cH3Oy-npe.D\_cH3Oxz*npe.grad\_cH3Oz+npe.z\_cH3O*F\_const*cH3O*(-npe.um\_cH3Oxx*Vx-npe.um\_cH3Oxy*Vy))+npe.z\_cOH*(-npe.D\_cOHxx*npe.grad\_cOH$ | A/m <sup>2</sup> | Current density, x component           | Domain 1  | + operation |

| Name | Expression                                                                                                                                                                                                                                                                                                                                                                                                                                                                                                                                                                                                                                                                                                                                                                                                                                                                         | Unit | Description | Selection | Details |
|------|------------------------------------------------------------------------------------------------------------------------------------------------------------------------------------------------------------------------------------------------------------------------------------------------------------------------------------------------------------------------------------------------------------------------------------------------------------------------------------------------------------------------------------------------------------------------------------------------------------------------------------------------------------------------------------------------------------------------------------------------------------------------------------------------------------------------------------------------------------------------------------|------|-------------|-----------|---------|
|      | $ \begin{aligned} & x- \\ & npe.D\_cOHxy* \\ & npe.grad\_cOH \\ & y- \\ & npe.D\_cOHxz* \\ & npe.grad\_cOH \\ & z+npe.z\_cOH* \\ & F\_const*cOH*( \\ & - \\ & npe.um\_cOHxx \\ & *Vx- \\ & npe.um\_cOHxy \\ & *Vy))+npe.z\_cB \\ & ead*(- \\ & npe.D\_cBeadxx \\ & *npe.grad\_cBe \\ & adx- \\ & npe.D\_cBeadxy \\ & *npe.grad\_cBe \\ & ady- \\ & npe.D\_cBeadxz \\ & *npe.grad\_cBe \\ & adz+npe.z\_cBe \\ & ad*F\_const*cB \\ & ead*(- \\ & npe.um\_cBead \\ & xx*Vx- \\ & npe.um\_cBead \\ & xy*Vy))+npe.z\_ \\ & cK*(- \\ & npe.D\_cKxx*np \\ & e.grad\_cKx- \\ & npe.D\_cKxy*np \\ & e.grad\_cKy- \\ & npe.D\_cKxz*np \\ & e.grad\_cKz+np \\ & e.z\_cK*F\_const \\ & *cK*(- \\ & npe.um\_cKxx* \\ & Vx- \\ & npe.um\_cKxy* \\ & Vy))+npe.z\_cCl \\ & *(- \\ & npe.D\_cClxx*n \\ & pe.grad\_cClx- \\ & npe.D\_cClxy*n \\ & pe.grad\_cCly- \\ & npe.D\_cClxz*n \end{aligned} $ |      |             |           |         |



| Name    | Expression                                                                                                                                                                                                                                                                                                                                                                                                                                                                                                                                                         | Unit             | Description                        | Selection | Details         |
|---------|--------------------------------------------------------------------------------------------------------------------------------------------------------------------------------------------------------------------------------------------------------------------------------------------------------------------------------------------------------------------------------------------------------------------------------------------------------------------------------------------------------------------------------------------------------------------|------------------|------------------------------------|-----------|-----------------|
|         | pe.grad_cClz+<br>npe.z_cCl*F_co<br>nst*cCl*(-<br>npe.um_cClxx*<br>Vx-<br>npe.um_cClxy*<br>Vy)))                                                                                                                                                                                                                                                                                                                                                                                                                                                                    |                  |                                    |           |                 |
| npe.J0y | F_const*(npe.z<br>_cH3O*(-<br>npe.D_cH3Oyx<br>*npe.grad_cH3<br>Ox-<br>npe.D_cH3Oyy<br>*npe.grad_cH3<br>Oy-<br>npe.D_cH3Oyz<br>*npe.grad_cH3<br>Oz+npe.z_cH3<br>O*F_const*cH3<br>O*(-<br>npe.um_cH3O<br>yx*Vx-<br>npe.um_cH3O<br>yy*Vy))+npe.z_<br>cOH*(-<br>npe.D_cOHyx*<br>npe.grad_cOH<br>x-<br>npe.D_cOHyy*<br>npe.grad_cOH<br>y-<br>npe.D_cOHyz*<br>npe.grad_cOH<br>z+npe.z_cOH*<br>F_const*cOH*(<br>-<br>npe.um_cOHyx<br>*Vx-<br>npe.um_cOHyy<br>*Vy))+npe.z_cB<br>ead*(-<br>npe.D_cBeadyx<br>*npe.grad_cBe<br>adx-<br>npe.D_cBeadyy<br>*npe.grad_cBe<br>ady- | A/m <sup>2</sup> | Current<br>density, y<br>component | Domain 1  | + operati<br>on |

| Name    | Expression                                                                                                                                                                                                                                                                                                                                                                                                                                                                                                                                                                                                                                                               | Unit             | Description                  | Selection | Details     |
|---------|--------------------------------------------------------------------------------------------------------------------------------------------------------------------------------------------------------------------------------------------------------------------------------------------------------------------------------------------------------------------------------------------------------------------------------------------------------------------------------------------------------------------------------------------------------------------------------------------------------------------------------------------------------------------------|------------------|------------------------------|-----------|-------------|
|         | $\begin{aligned} & npe.D\_cBeadyz \\ & *npe.grad\_cBe \\ & adz+npe.z\_cBe \\ & ad*F\_const*cB \\ & ead*(- \\ & npe.um\_cBead \\ & yx*Vx- \\ & npe.um\_cBead \\ & yy*Vy))+npe.z\_ \\ & cK*(- \\ & npe.D\_cKyx*np \\ & e.grad\_cKx- \\ & npe.D\_cKyy*np \\ & e.grad\_cKy- \\ & npe.D\_cKyz*np \\ & e.grad\_cKz+npe \\ & e.z\_cK*F\_const \\ & *cK*(- \\ & npe.um\_cKyx* \\ & Vx- \\ & npe.um\_cKyy* \\ & Vy))+npe.z\_cCl \\ & *(- \\ & npe.D\_cClyx*n \\ & pe.grad\_cClx- \\ & npe.D\_cClyy*n \\ & pe.grad\_cCly- \\ & npe.D\_cClyz*n \\ & pe.grad\_cClz+ \\ & npe.z\_cCl*F\_co \\ & nst*cCl*(- \\ & npe.um\_cClyx* \\ & Vx- \\ & npe.um\_cClyy* \\ & Vy))) \end{aligned}$ |                  |                              |           |             |
| npe.J0z | $\begin{aligned} & F\_const*(npe.z \\ & \_cH3O*(- \\ & npe.D\_cH3Ozx \\ & *npe.grad\_cH3 \\ & Ox- \\ & npe.D\_cH3Ozy \\ & *npe.grad\_cH3 \\ & Oy- \\ & npe.D\_cH3Ozz \\ & *npe.grad\_cH3 \\ & Oz+npe.z\_cH3 \\ & O*F\_const*cH3 \end{aligned}$                                                                                                                                                                                                                                                                                                                                                                                                                           | A/m <sup>2</sup> | Current density, z component | Domain 1  | + operation |

| Name | Expression                                                                                                                                                                                                                                                                                                                                                                                                                                                                                                                                                                                                                                                                   | Unit | Description | Selection | Details |
|------|------------------------------------------------------------------------------------------------------------------------------------------------------------------------------------------------------------------------------------------------------------------------------------------------------------------------------------------------------------------------------------------------------------------------------------------------------------------------------------------------------------------------------------------------------------------------------------------------------------------------------------------------------------------------------|------|-------------|-----------|---------|
|      | $O*(-npe.um\_cH3Oz$ $x*Vx-$ $npe.um\_cH3Oz$ $y*Vy))+npe.z\_c$ $OH*(-$ $npe.D\_cOHzx*$ $npe.grad\_cOH$ $x-$ $npe.D\_cOHzy*$ $npe.grad\_cOH$ $y-$ $npe.D\_cOHzz*$ $npe.grad\_cOH$ $z+npe.z\_cOH*$ $F\_const*cOH*($ $-$ $npe.um\_cOHzx$ $*Vx-$ $npe.um\_cOHzy$ $*Vy))+npe.z\_cB$ $ead*(-$ $npe.D\_cBeadzx$ $*npe.grad\_cBe$ $adx-$ $npe.D\_cBeadzy$ $*npe.grad\_cBe$ $ady-$ $npe.D\_cBeadzz$ $*npe.grad\_cBe$ $adz+npe.z\_cBe$ $ad*F\_const*cB$ $ead*(-$ $npe.um\_cBead$ $zx*Vx-$ $npe.um\_cBead$ $zy*Vy))+npe.z\_c$ $K*(-$ $npe.D\_cKzx*np$ $e.grad\_cKx-$ $npe.D\_cKzy*np$ $e.grad\_cKy-$ $npe.D\_cKzz*np$ $e.grad\_cKz+np$ $e.z\_cK*F\_const$ $*cK*(-$ $npe.um\_cKzx*$ $Vx-$ |      |             |           |         |

| Name             | Expression                                                                                                                                                                                                                    | Unit                    | Description                           | Selection | Details |
|------------------|-------------------------------------------------------------------------------------------------------------------------------------------------------------------------------------------------------------------------------|-------------------------|---------------------------------------|-----------|---------|
|                  | npe.um_cKzy*<br>Vy))+npe.z_cCl<br>*(-<br>npe.D_cClzx*n<br>pe.grad_cClx-<br>npe.D_cClzy*n<br>pe.grad_cCly-<br>npe.D_cClzz*n<br>pe.grad_cClz+<br>npe.z_cCl*F_co<br>nst*cCl*(-<br>npe.um_cClzx*<br>Vx-<br>npe.um_cClzy*<br>Vy))) |                         |                                       |           |         |
| npe.Jx           | npe.J0x                                                                                                                                                                                                                       | A/m <sup>2</sup>        | Current<br>density, x<br>component    | Domain 1  |         |
| npe.Jy           | npe.J0y                                                                                                                                                                                                                       | A/m <sup>2</sup>        | Current<br>density, y<br>component    | Domain 1  |         |
| npe.Jz           | npe.J0z                                                                                                                                                                                                                       | A/m <sup>2</sup>        | Current<br>density, z<br>component    | Domain 1  |         |
| npe.V            | V                                                                                                                                                                                                                             | V                       | Electric<br>potential                 | Domain 1  |         |
| npe.gradVx       | Vx                                                                                                                                                                                                                            | V/m                     | Potential<br>gradient, x<br>component | Domain 1  |         |
| npe.gradVy       | Vy                                                                                                                                                                                                                            | V/m                     | Potential<br>gradient, y<br>component | Domain 1  |         |
| npe.gradVz       | 0                                                                                                                                                                                                                             | V/m                     | Potential<br>gradient, z<br>component | Domain 1  |         |
| npe.Res_ch3<br>O | -<br>npe.D_ch3Oxx<br>*ch3Oxx-<br>npe.D_ch3Oxy<br>*ch3Oxy-<br>npe.D_ch3Oyx<br>*ch3Oyx-<br>npe.D_ch3Oyy<br>*ch3Oyy+d(ch<br>3O*(npe.u-                                                                                           | mol/(m <sup>3</sup> .s) | Equation<br>residual                  | Domain 1  |         |

| Name         | Expression                                                                                                                                                                                                                                                                                                                                                                                                                                                                                            | Unit                    | Description       | Selection | Details |
|--------------|-------------------------------------------------------------------------------------------------------------------------------------------------------------------------------------------------------------------------------------------------------------------------------------------------------------------------------------------------------------------------------------------------------------------------------------------------------------------------------------------------------|-------------------------|-------------------|-----------|---------|
|              | $\begin{aligned} & npe.z\_cH3O * npe.um\_cH3O_{xx} \\ & * F\_const * d(npe.V, x) - \\ & npe.z\_cH3O * npe.um\_cH3O_{xy} \\ & * F\_const * d(npe.V, y), x) + d(cH3O * (npe.v - \\ & npe.z\_cH3O * npe.um\_cH3O_{yx} \\ & * F\_const * d(npe.V, x) - \\ & npe.z\_cH3O * npe.um\_cH3O_{yy} \\ & * F\_const * d(npe.V, y)), y) - \\ & npe.R\_cH3O \end{aligned}$                                                                                                                                          |                         |                   |           |         |
| npe.Res_cOH  | $\begin{aligned} & - \\ & npe.D\_cOH_{xx} * cOH_{xx} - \\ & npe.D\_cOH_{xy} * cOH_{xy} - \\ & npe.D\_cOH_{yx} * cOH_{yx} - \\ & npe.D\_cOH_{yy} * cOH_{yy} + d(cOH * (npe.u - \\ & npe.z\_cOH * npe.um\_cOH_{xx} * F\_const * d(npe.V, x) - \\ & npe.z\_cOH * npe.um\_cOH_{xy} * F\_const * d(npe.V, y)), x) + d(cOH * ( \\ & npe.v - \\ & npe.z\_cOH * npe.um\_cOH_{yx} * F\_const * d(npe.V, x) - \\ & npe.z\_cOH * npe.um\_cOH_{yy} * F\_const * d(npe.V, y)), y) - \\ & npe.R\_cOH \end{aligned}$ | mol/(m <sup>3</sup> .s) | Equation residual | Domain 1  |         |
| npe.Res_cBea | -                                                                                                                                                                                                                                                                                                                                                                                                                                                                                                     | mol/(m                  | Equation          | Domain 1  |         |

| Name       | Expression                                                                                                                                                                                                                                                                                                                                                                                                                                                                                                                                       | Unit                    | Description       | Selection | Details |
|------------|--------------------------------------------------------------------------------------------------------------------------------------------------------------------------------------------------------------------------------------------------------------------------------------------------------------------------------------------------------------------------------------------------------------------------------------------------------------------------------------------------------------------------------------------------|-------------------------|-------------------|-----------|---------|
| d          | $\begin{aligned} & npe.D\_cBeadxx \\ & *cBeadxx- \\ & npe.D\_cBeadxy \\ & *cBeadxy- \\ & npe.D\_cBeadyx \\ & *cBeadyx- \\ & npe.D\_cBeadyy \\ & *cBeadyy+d(cB \\ & ead*(npe.u- \\ & npe.z\_cBead*n \\ & pe.um\_cBeadx \\ & x*F\_const*d(np \\ & e.V,x)- \\ & npe.z\_cBead*n \\ & pe.um\_cBeadx \\ & y*F\_const*d(np \\ & e.V,y)),x)+d(cB \\ & ead*(npe.v- \\ & npe.z\_cBead*n \\ & pe.um\_cBeady \\ & x*F\_const*d(np \\ & e.V,x)- \\ & npe.z\_cBead*n \\ & pe.um\_cBeady \\ & y*F\_const*d(np \\ & e.V,y)),y)- \\ & npe.R\_cBead \end{aligned}$ | <sup>3</sup> .s)        | residual          |           |         |
| npe.Res_cK | $\begin{aligned} & - \\ & npe.D\_cKxx*cK \\ & xx- \\ & npe.D\_cKxy*cK \\ & xy- \\ & npe.D\_cKyx*cK \\ & yx- \\ & npe.D\_cKyy*cK \\ & yy+d(cK*(npe. \\ & u- \\ & npe.z\_cK*npe.u \\ & m\_cKxx*F\_cons \\ & t*d(npe.V,x)- \\ & npe.z\_cK*npe.u \\ & m\_cKxy*F\_cons \\ & t*d(npe.V,y)),x) \\ & +d(cK*(npe.v- \\ & npe.z\_cK*npe.u \\ & m\_cKyx*F\_cons \\ & t*d(npe.V,x)- \end{aligned}$                                                                                                                                                           | mol/(m <sup>3</sup> .s) | Equation residual | Domain 1  |         |

| Name | Expression                                                                           | Unit | Description | Selection | Details |
|------|--------------------------------------------------------------------------------------|------|-------------|-----------|---------|
|      | $npe.z\_cK * npe.u$<br>$m\_cKyy * F\_cons$<br>$t * d(npe.V, y), y)$<br>$- npe.R\_cK$ |      |             |           |         |

### Shape functions

| Name  | Shape function       | Unit               | Description        | Shape frame | Selection |
|-------|----------------------|--------------------|--------------------|-------------|-----------|
| cH3O  | Lagrange (Quadratic) | mol/m <sup>3</sup> | Concentration      | Spatial     | Domain 1  |
| cOH   | Lagrange (Quadratic) | mol/m <sup>3</sup> | Concentration      | Spatial     | Domain 1  |
| cBead | Lagrange (Quadratic) | mol/m <sup>3</sup> | Concentration      | Spatial     | Domain 1  |
| cK    | Lagrange (Quadratic) | mol/m <sup>3</sup> | Concentration      | Spatial     | Domain 1  |
| V     | Lagrange (Quadratic) | V                  | Electric potential | Spatial     | Domain 1  |

### Weak expressions

| Weak expression                                                                       | Integration order | Integration frame | Selection       |
|---------------------------------------------------------------------------------------|-------------------|-------------------|-----------------|
| $cH3O * (npe.u * test(cH3Ox) + npe.v * test(cH3Oy)) * (isScalingSystemDomain = 0)$    | 4                 | Spatial           | Domain 1        |
| $npe.cbf\_cH3O * test(cH3O)$                                                          | 4                 | Spatial           | Boundaries 1–12 |
| $cOH * (npe.u * test(cOHx) + npe.v * test(cOHy)) * (isScalingSystemDomain = 0)$       | 4                 | Spatial           | Domain 1        |
| $npe.cbf\_cOH * test(cOH)$                                                            | 4                 | Spatial           | Boundaries 1–12 |
| $cBead * (npe.u * test(cBeadx) + npe.v * test(cBeady)) * (isScalingSystemDomain = 0)$ | 4                 | Spatial           | Domain 1        |
| $npe.cbf\_cBead * test(cBead)$                                                        | 4                 | Spatial           | Boundaries 1–12 |
| $cK * (npe.u * test(cKx) + npe.v * test(cKy)) * (isScalingSystemDomain = 0)$          | 4                 | Spatial           | Domain 1        |

| Weak expression                                                                                                                                                     | Integration order | Integration frame | Selection       |
|---------------------------------------------------------------------------------------------------------------------------------------------------------------------|-------------------|-------------------|-----------------|
| SystemDomain==0)                                                                                                                                                    |                   |                   |                 |
| npe.cbf_cK*test(cK)                                                                                                                                                 | 4                 | Spatial           | Boundaries 1–12 |
| npe.z_cH3O*F_const*cH3O*((-npe.um_cH3Oxx*d(npe.V,x)-npe.um_cH3Oxy*d(npe.V,y))*test(cH3Ox)+(-npe.um_cH3Oyx*d(npe.V,x)-npe.um_cH3Oyy*d(npe.V,y))*test(cH3Oy))         | 4                 | Spatial           | Domain 1        |
| npe.z_cOH*F_const*cOH*((-npe.um_cOHxx*d(npe.V,x)-npe.um_cOHxy*d(npe.V,y))*test(cOHx)+(-npe.um_cOHyx*d(npe.V,x)-npe.um_cOHyy*d(npe.V,y))*test(cOHy))                 | 4                 | Spatial           | Domain 1        |
| npe.z_cBead*F_const*cBead*((-npe.um_cBeadxx*d(npe.V,x)-npe.um_cBeadxy*d(npe.V,y))*test(cBeadx)+(-npe.um_cBeadyx*d(npe.V,x)-npe.um_cBeadyy*d(npe.V,y))*test(cBeady)) | 4                 | Spatial           | Domain 1        |
| npe.z_cK*F_const*cK*((-npe.um_cKxx*d(npe.V,x)-npe.um_cKxy*d(npe.V,y))*test(cKx)+(-npe.um_cKyx*d(npe.V,x)-npe.um_cKyy*d(npe.V,y))*test(cKy))                         | 4                 | Spatial           | Domain 1        |
| npe.dflux_cH3Ox*test(cH3Ox)+npe.dflux_cH3O                                                                                                                          | 4                 | Spatial           | Domain 1        |



| Weak expression                                                                                           | Integration order | Integration frame | Selection |
|-----------------------------------------------------------------------------------------------------------|-------------------|-------------------|-----------|
| $y \cdot \text{test}(cH3Oy)$                                                                              |                   |                   |           |
| $\text{npe.dflux\_cOHx} \cdot \text{test}(cOHx) + \text{npe.dflux\_cOHy} \cdot \text{test}(cOHy)$         | 4                 | Spatial           | Domain 1  |
| $\text{npe.dflux\_cBeadx} \cdot \text{test}(cBeadx) + \text{npe.dflux\_cBeady} \cdot \text{test}(cBeady)$ | 4                 | Spatial           | Domain 1  |
| $\text{npe.dflux\_cKx} \cdot \text{test}(cKx) + \text{npe.dflux\_cKy} \cdot \text{test}(cKy)$             | 4                 | Spatial           | Domain 1  |
| $\text{npe.Jx} \cdot \text{test}(Vx) + \text{npe.Jy} \cdot \text{test}(Vy)$                               | 4                 | Spatial           | Domain 1  |
| $\text{npe.streamline}(\text{isScalingSystemDomain} = 0)$                                                 | 4                 | Spatial           | Domain 1  |

#### 2.4.4 No Flux 1

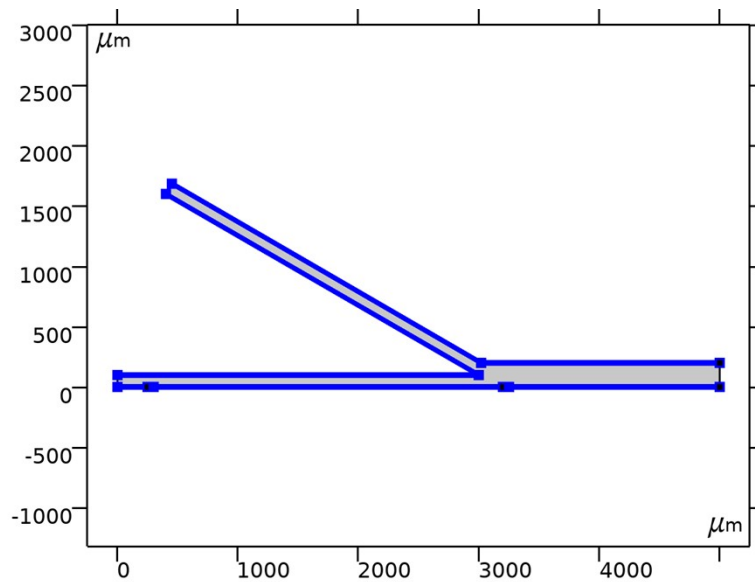

No Flux 1

#### SELECTION

|                        |                                             |
|------------------------|---------------------------------------------|
| Geometric entity level | Boundary                                    |
| Selection              | Geometry geom1: Dimension 1: All boundaries |

#### EQUATIONS

$$-\mathbf{n} \cdot \mathbf{J}_i = 0$$

## Convection

### SETTINGS

| Description | Value |
|-------------|-------|
| Include     | Off   |

## Variables

| Name          | Expression                                                    | Unit                    | Description              | Selection                  |
|---------------|---------------------------------------------------------------|-------------------------|--------------------------|----------------------------|
| npe.cbf_cH3O  | $cH3O*(-npe.u*npe.nxmesh-npe.v*npe.nymesh-npe.w*npe.nzmesh)$  | mol/(m <sup>2</sup> ·s) | Convective boundary flux | Boundaries 2–3, 5, 7–9, 11 |
| npe.cbf_cOH   | $cOH*(-npe.u*npe.nxmesh-npe.v*npe.nymesh-npe.w*npe.nzmesh)$   | mol/(m <sup>2</sup> ·s) | Convective boundary flux | Boundaries 2–3, 5, 7–9, 11 |
| npe.cbf_cBead | $cBead*(-npe.u*npe.nxmesh-npe.v*npe.nymesh-npe.w*npe.nzmesh)$ | mol/(m <sup>2</sup> ·s) | Convective boundary flux | Boundaries 2–3, 5, 7–9, 11 |
| npe.cbf_cK    | $cK*(-npe.u*npe.nxmesh-npe.v*npe.nymesh-npe.w*npe.nzmesh)$    | mol/(m <sup>2</sup> ·s) | Convective boundary flux | Boundaries 2–3, 5, 7–9, 11 |

## 2.4.5 Electric Insulation 1

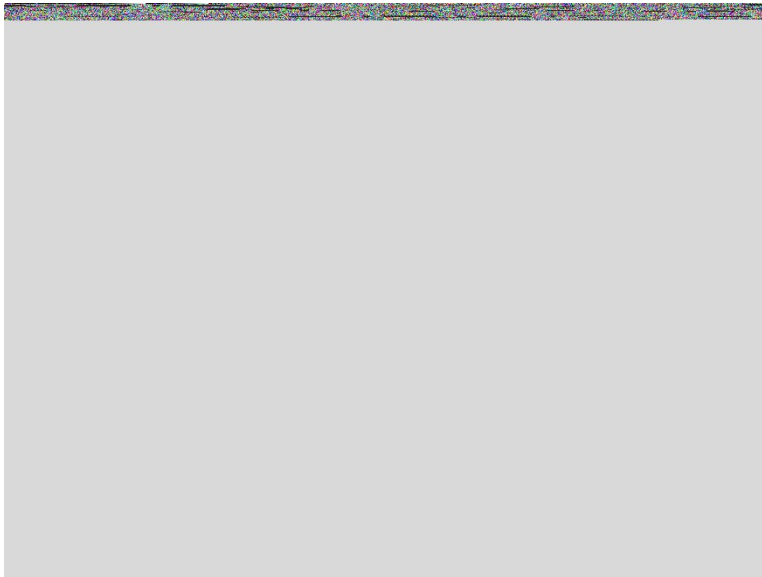

*Electric Insulation 1*

## SELECTION

|                        |                                             |
|------------------------|---------------------------------------------|
| Geometric entity level | Boundary                                    |
| Selection              | Geometry geom1: Dimension 1: All boundaries |

## EQUATIONS

$$-\mathbf{n} \cdot \mathbf{i} = 0$$

### 2.4.6 Initial Values 1

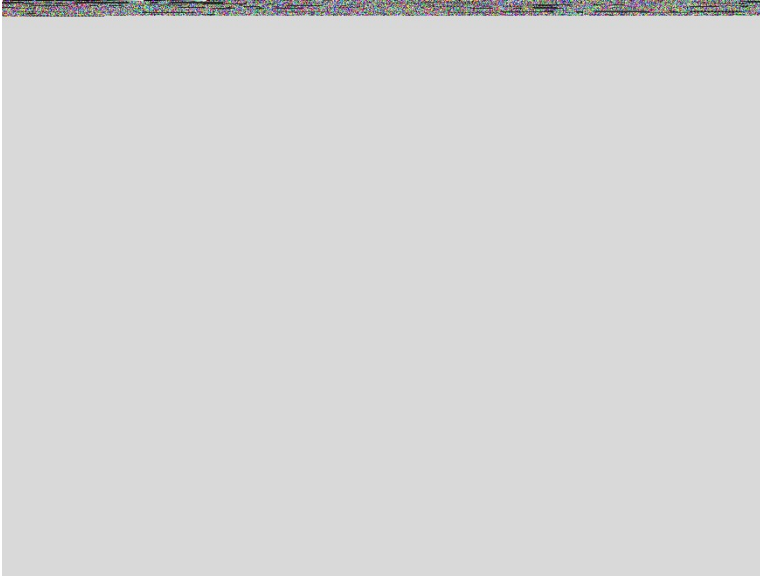

*Initial Values 1*

## SELECTION

|                        |                                          |
|------------------------|------------------------------------------|
| Geometric entity level | Domain                                   |
| Selection              | Geometry geom1: Dimension 2: All domains |

### Initial values

## SETTINGS

| Description        | Value                                  |
|--------------------|----------------------------------------|
| Concentration      | {cH3O0, cOH0, cBead0, cK0 + cBead0, 0} |
| Electric potential | 0                                      |

## 2.4.7 Inflow 1

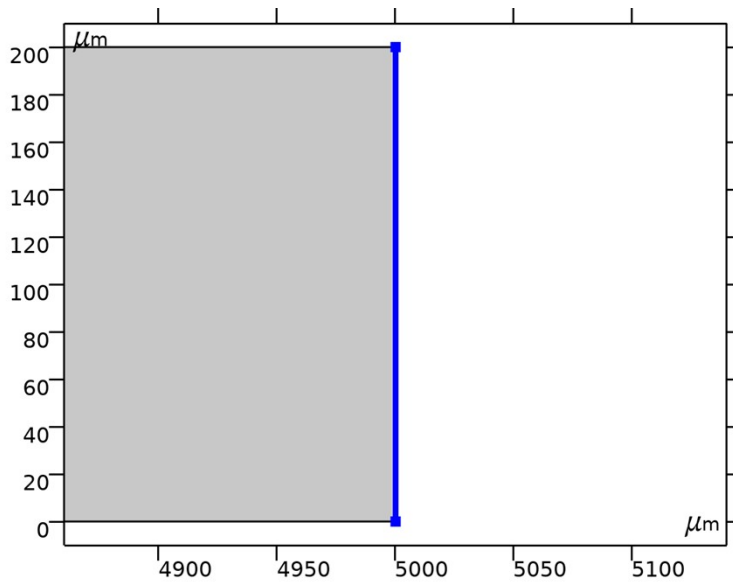

*Inflow 1*

### SELECTION

|                        |                                          |
|------------------------|------------------------------------------|
| Geometric entity level | Boundary                                 |
| Selection              | Geometry geom1: Dimension 1: Boundary 12 |

### EQUATIONS

$$c_i = c_{0j}$$

.....

### Concentration

#### SETTINGS

| Description   | Value                                  |
|---------------|----------------------------------------|
| Concentration | {cH3O0, cOH0, cBead0, cK0 + cBead0, 0} |

### Boundary condition type

#### SETTINGS

| Description             | Value                    |
|-------------------------|--------------------------|
| Boundary condition type | Concentration constraint |

### Variables

| Name    | Expression | Unit               | Description   | Selection | Details   |
|---------|------------|--------------------|---------------|-----------|-----------|
| npe.c0_ | cH3O0      | mol/m <sup>3</sup> | Concentration | Boundary  | + operati |

| Name         | Expression | Unit               | Description   | Selection   | Details     |
|--------------|------------|--------------------|---------------|-------------|-------------|
| cH3O         |            |                    |               | 12          | on          |
| npe.c0_cOH   | cOH0       | mol/m <sup>3</sup> | Concentration | Boundary 12 | + operation |
| npe.c0_cBead | cBead0     | mol/m <sup>3</sup> | Concentration | Boundary 12 | + operation |
| npe.c0_cK    | cK0+cBead0 | mol/m <sup>3</sup> | Concentration | Boundary 12 | + operation |

### Constraints

| Constraint          | Constraint force | Shape function       | Selection   | Details   |
|---------------------|------------------|----------------------|-------------|-----------|
| -cH3O+npe.c0_cH3O   | -test(cH3O)      | Lagrange (Quadratic) | Boundary 12 | Elemental |
| -cOH+npe.c0_cOH     | -test(cOH)       | Lagrange (Quadratic) | Boundary 12 | Elemental |
| -cBead+npe.c0_cBead | -test(cBead)     | Lagrange (Quadratic) | Boundary 12 | Elemental |
| -cK+npe.c0_cK       | -test(cK)        | Lagrange (Quadratic) | Boundary 12 | Elemental |

### 2.4.8 Outflow 1

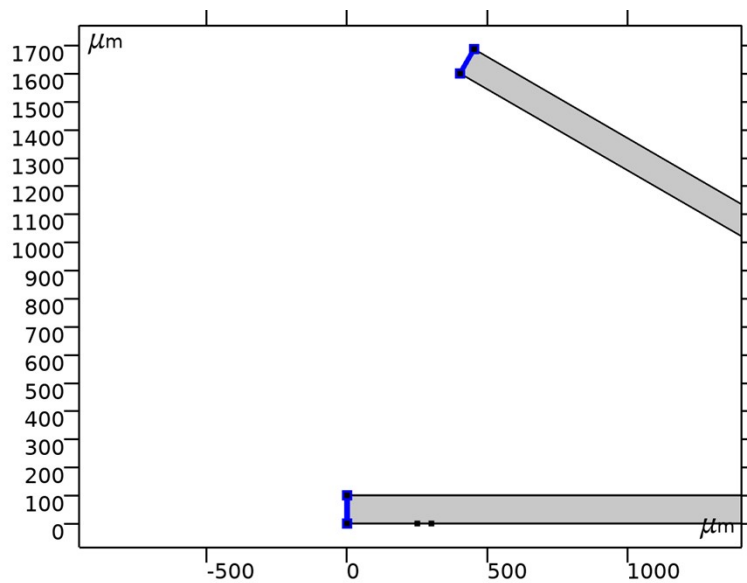

Outflow 1

SELECTION

|                        |                                              |
|------------------------|----------------------------------------------|
| Geometric entity level | Boundary                                     |
| Selection              | Geometry geom1: Dimension 1: Boundaries 1, 6 |

## EQUATIONS

$$\mathbf{n} \cdot D_i \nabla c_i = 0$$

### Weak expressions

| Weak expression                                                                                                                                                                                                                                                                                                                              | Integration order | Integration frame | Selection       |
|----------------------------------------------------------------------------------------------------------------------------------------------------------------------------------------------------------------------------------------------------------------------------------------------------------------------------------------------|-------------------|-------------------|-----------------|
| -<br>(npe.nx*npe.u+npe.ny*npe.v+npe.nz*npe.w)*cH3O*test(cH3O)                                                                                                                                                                                                                                                                                | 4                 | Spatial           | Boundaries 1, 6 |
| -<br>npe.z_cH3O*F_const*cH3O*(-<br>npe.nx*(npe.um_cH3Ox*mean(d(npe.V,x))+npe.um_cH3Oxy*mean(d(npe.V,y)))+npe.um_cH3Oxz*mean(0))-<br>npe.ny*(npe.um_cH3Ox*mean(d(npe.V,x))+npe.um_cH3Oyy*mean(d(npe.V,y)))+npe.um_cH3Oyz*mean(0))-<br>npe.nz*(npe.um_cH3Ox*mean(d(npe.V,x))+npe.um_cH3Ozy*mean(d(npe.V,y)))+npe.um_cH3Ozz*mean(0))*test(cH3O) | 4                 | Spatial           | Boundaries 1, 6 |
| -<br>(npe.nx*npe.u+npe.ny*npe.v+npe.nz*npe.w)*cOH*test(cOH)                                                                                                                                                                                                                                                                                  | 4                 | Spatial           | Boundaries 1, 6 |
| -<br>npe.z_cOH*F_const*cOH*(-<br>npe.nx*(npe.um_cOHxx*mean(d(npe.V,x))+npe.um_cOHxy*mean(d(npe.V,y)))+npe.um_cOHxz*mean(0))-<br>npe.ny*(npe.um_cOHyx*mean(d(npe.V,x))+npe.                                                                                                                                                                   | 4                 | Spatial           | Boundaries 1, 6 |

| Weak expression                                                                                                                                                                                                                                                                                                                                        | Integration order | Integration frame | Selection       |
|--------------------------------------------------------------------------------------------------------------------------------------------------------------------------------------------------------------------------------------------------------------------------------------------------------------------------------------------------------|-------------------|-------------------|-----------------|
| um_cOHyy*mean(d(npe.V,y))+npe.um_cOHyz*mean(0))-npe.nz*(npe.um_cOHzx*mean(d(npe.V,x))+npe.um_cOHzy*mean(d(npe.V,y))+npe.um_cOHzz*mean(0)))*test(cOH)                                                                                                                                                                                                   |                   |                   |                 |
| -<br>(npe.nx*npe.u+npe.ny*npe.v+npe.nz*npe.w)*cBead*test(cBead)                                                                                                                                                                                                                                                                                        | 4                 | Spatial           | Boundaries 1, 6 |
| -<br>npe.z_cBead*F_const*cBead*(-<br>npe.nx*(npe.um_cBeadx*mean(d(npe.V,x))+npe.um_cBeadxy*mean(d(npe.V,y))+npe.um_cBeadxz*mean(0))-<br>npe.ny*(npe.um_cBeady*mean(d(npe.V,x))+npe.um_cBeadyy*mean(d(npe.V,y))+npe.um_cBeadyz*mean(0))-<br>npe.nz*(npe.um_cBeadz*mean(d(npe.V,x))+npe.um_cBeadzy*mean(d(npe.V,y))+npe.um_cBeadzz*mean(0)))*test(cBead) | 4                 | Spatial           | Boundaries 1, 6 |
| -<br>(npe.nx*npe.u+npe.ny*npe.v+npe.nz*npe.w)*cK*test(cK)                                                                                                                                                                                                                                                                                              | 4                 | Spatial           | Boundaries 1, 6 |
| -npe.z_cK*F_const*cK*(-<br>npe.nx*(npe.um_cKxx*mean(d(npe.V,x))+npe.um_cKxy*mean(d(npe.V,y))+npe.um_cKxz*mean(0))-<br>npe.ny*(npe.um_cKyx*mean(d(npe.V,x))+npe.um_cKyy*mean(d(npe.V,y))+npe.um_cKyz*mean(                                                                                                                                              | 4                 | Spatial           | Boundaries 1, 6 |

| Weak expression                                                                                                 | Integration order | Integration frame | Selection |
|-----------------------------------------------------------------------------------------------------------------|-------------------|-------------------|-----------|
| $0)) - npe.nz*(npe.um\_cKzx*mean(d(npe.V,x)) + npe.um\_cKzy*mean(d(npe.V,y)) + npe.um\_cKzz*mean(0)))*test(cK)$ |                   |                   |           |

### 2.4.9 Electric Potential 1

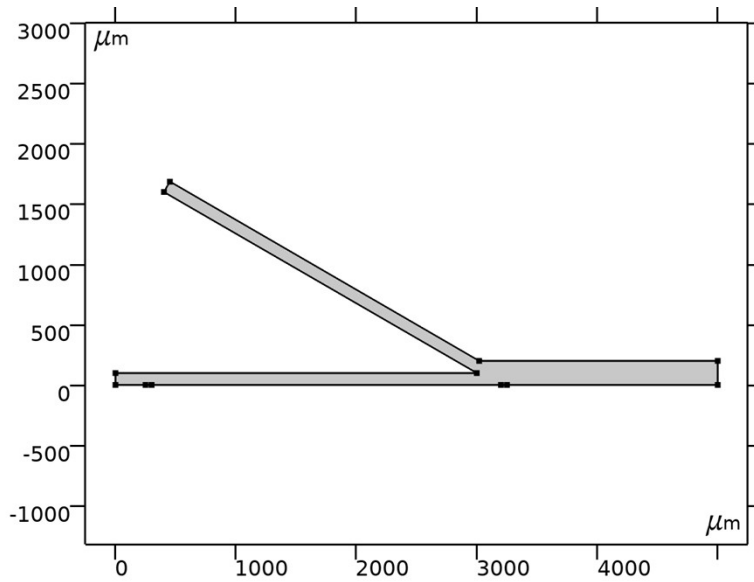

*Electric Potential 1*

#### SELECTION

|                        |                                            |
|------------------------|--------------------------------------------|
| Geometric entity level | Boundary                                   |
| Selection              | Geometry geom1: Dimension 1: No boundaries |

#### EQUATIONS

$$V = V_0$$



## 2.4.10 Electric Potential 2

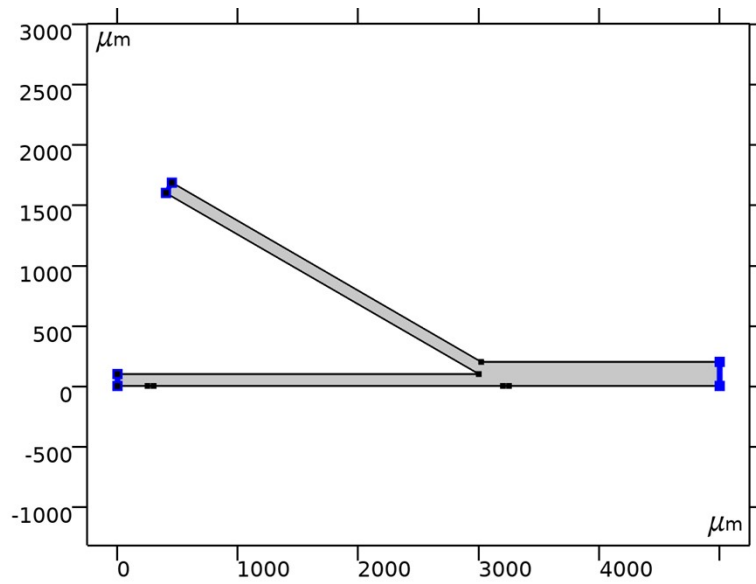

*Electric Potential 2*

### SELECTION

|                        |                                                  |
|------------------------|--------------------------------------------------|
| Geometric entity level | Boundary                                         |
| Selection              | Geometry geom1: Dimension 1: Boundaries 1, 6, 12 |

### EQUATIONS

$$V = V_0$$

### Variables

| Name   | Expression | Unit | Description        | Selection           |
|--------|------------|------|--------------------|---------------------|
| npe.V0 | 30         | V    | Electric potential | Boundaries 1, 6, 12 |

### Constraints

| Constraint | Constraint force | Shape function       | Selection           | Details   |
|------------|------------------|----------------------|---------------------|-----------|
| npe.V0-V   | test(npe.V0-V)   | Lagrange (Quadratic) | Boundaries 1, 6, 12 | Elemental |

## 2.4.11 Flux 1

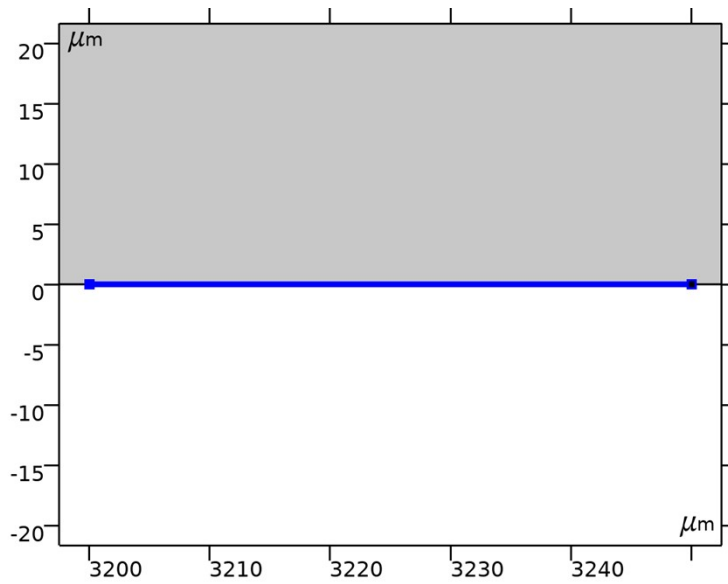

*Flux 1*

### SELECTION

|                        |                                          |
|------------------------|------------------------------------------|
| Geometric entity level | Boundary                                 |
| Selection              | Geometry geom1: Dimension 1: Boundary 10 |

### EQUATIONS

$$-\mathbf{n} \cdot \mathbf{J}_i = J_{0,i}$$

### Convection

#### SETTINGS

| Description | Value |
|-------------|-------|
| Include     | Off   |

### Inward flux

#### SETTINGS

| Description   | Value |
|---------------|-------|
| Species cH3O  | Off   |
| Species cOH   | On    |
| Species cBead | Off   |
| Species cK    | Off   |
| Species cCl   | Off   |

## Variables

| Name          | Expression                                                              | Unit                    | Description                    | Selection      |
|---------------|-------------------------------------------------------------------------|-------------------------|--------------------------------|----------------|
| npe.cbf_cH3O  | cH3O*(-<br>npe.u*npe.nxmesh-<br>npe.v*npe.nymesh-<br>npe.w*npe.nzmesh)  | mol/(m <sup>2</sup> ·s) | Convective<br>boundary<br>flux | Boundary<br>10 |
| npe.cbf_cOH   | cOH*(-<br>npe.u*npe.nxmesh-<br>npe.v*npe.nymesh-<br>npe.w*npe.nzmesh)   | mol/(m <sup>2</sup> ·s) | Convective<br>boundary<br>flux | Boundary<br>10 |
| npe.cbf_cBead | cBead*(-<br>npe.u*npe.nxmesh-<br>npe.v*npe.nymesh-<br>npe.w*npe.nzmesh) | mol/(m <sup>2</sup> ·s) | Convective<br>boundary<br>flux | Boundary<br>10 |
| npe.cbf_cK    | cK*(-<br>npe.u*npe.nxmesh-<br>npe.v*npe.nymesh-<br>npe.w*npe.nzmesh)    | mol/(m <sup>2</sup> ·s) | Convective<br>boundary<br>flux | Boundary<br>10 |

## Weak expressions

| Weak expression  | Integration order | Integration frame | Selection      |
|------------------|-------------------|-------------------|----------------|
| 0                | 4                 | Spatial           | Boundary<br>10 |
| fssBPE*test(cOH) | 4                 | Spatial           | Boundary<br>10 |
| 0                | 4                 | Spatial           | Boundary<br>10 |
| 0                | 4                 | Spatial           | Boundary<br>10 |

## 2.4.12 Flux 2

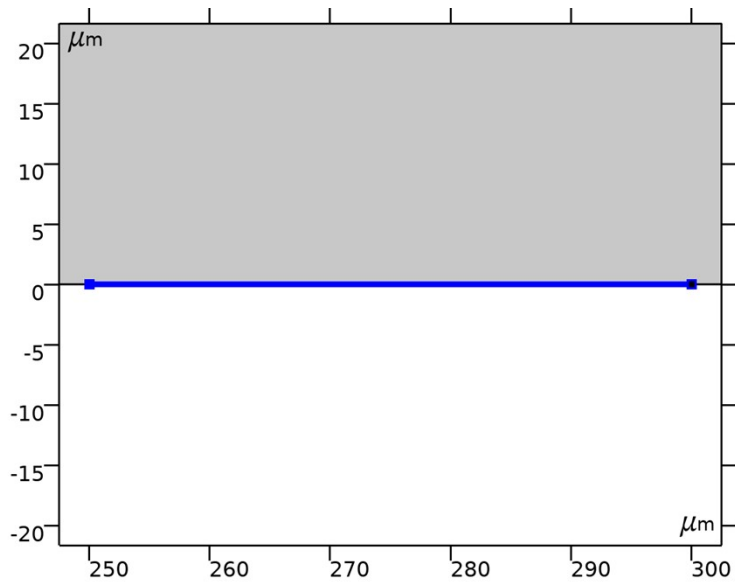

*Flux 2*

### SELECTION

|                        |                                         |
|------------------------|-----------------------------------------|
| Geometric entity level | Boundary                                |
| Selection              | Geometry geom1: Dimension 1: Boundary 4 |

### EQUATIONS

$$-\mathbf{n} \cdot \mathbf{j}_i = j_{o,i}$$

### Convection

#### SETTINGS

| Description | Value |
|-------------|-------|
| Include     | Off   |

### Inward flux

#### SETTINGS

| Description   | Value |
|---------------|-------|
| Species cH3O  | On    |
| Species cOH   | Off   |
| Species cBead | Off   |
| Species cK    | Off   |
| Species cCl   | Off   |

| Description | Value                |
|-------------|----------------------|
| Inward flux | {fssBPE, 0, 0, 0, 0} |

### Variables

| Name          | Expression                                                    | Unit                    | Description              | Selection  |
|---------------|---------------------------------------------------------------|-------------------------|--------------------------|------------|
| npe.cbf_cH3O  | $cH3O*(-npe.u*npe.nxmesh-npe.v*npe.nymesh-npe.w*npe.nzmesh)$  | mol/(m <sup>2</sup> ·s) | Convective boundary flux | Boundary 4 |
| npe.cbf_cOH   | $cOH*(-npe.u*npe.nxmesh-npe.v*npe.nymesh-npe.w*npe.nzmesh)$   | mol/(m <sup>2</sup> ·s) | Convective boundary flux | Boundary 4 |
| npe.cbf_cBead | $cBead*(-npe.u*npe.nxmesh-npe.v*npe.nymesh-npe.w*npe.nzmesh)$ | mol/(m <sup>2</sup> ·s) | Convective boundary flux | Boundary 4 |
| npe.cbf_cK    | $cK*(-npe.u*npe.nxmesh-npe.v*npe.nymesh-npe.w*npe.nzmesh)$    | mol/(m <sup>2</sup> ·s) | Convective boundary flux | Boundary 4 |

### Weak expressions

| Weak expression   | Integration order | Integration frame | Selection  |
|-------------------|-------------------|-------------------|------------|
| fssBPE*test(cH3O) | 4                 | Spatial           | Boundary 4 |
| 0                 | 4                 | Spatial           | Boundary 4 |
| 0                 | 4                 | Spatial           | Boundary 4 |
| 0                 | 4                 | Spatial           | Boundary 4 |

## 2.4.13 Current Density 1

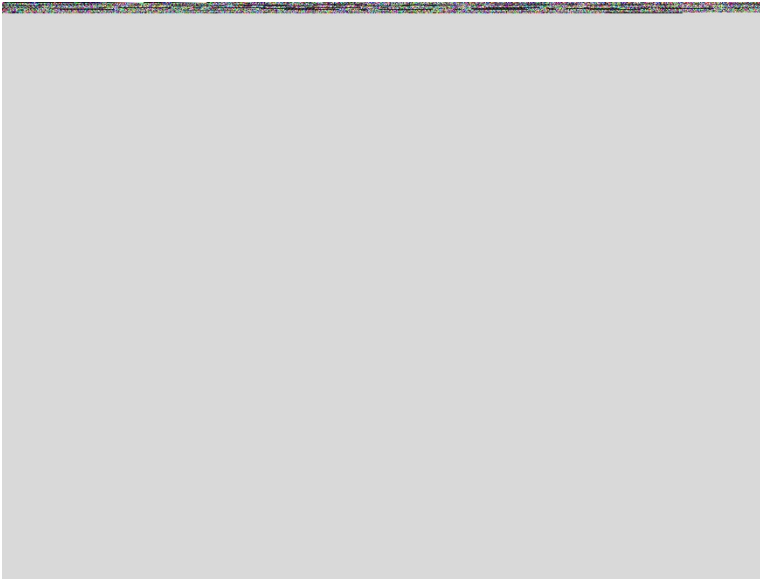

*Current Density 1*

### SELECTION

|                        |                                          |
|------------------------|------------------------------------------|
| Geometric entity level | Boundary                                 |
| Selection              | Geometry geom1: Dimension 1: Boundary 10 |

### EQUATIONS

$$-\mathbf{n} \cdot \mathbf{i} = \dot{i}_0$$

**Inward current density**

### SETTINGS

| Description            | Value   |
|------------------------|---------|
| Inward current density | -jssBPE |

**Variables**

| Name          | Expression | Unit             | Description            | Selection   |
|---------------|------------|------------------|------------------------|-------------|
| npe.i0_cdens4 | -jssBPE    | A/m <sup>2</sup> | Inward current density | Boundary 10 |

**Weak expressions**

| Weak expression       | Integration order | Integration frame | Selection   |
|-----------------------|-------------------|-------------------|-------------|
| npe.i0_cdens4*test(V) | 4                 | Spatial           | Boundary 10 |

## 2.4.14 Current Density 2

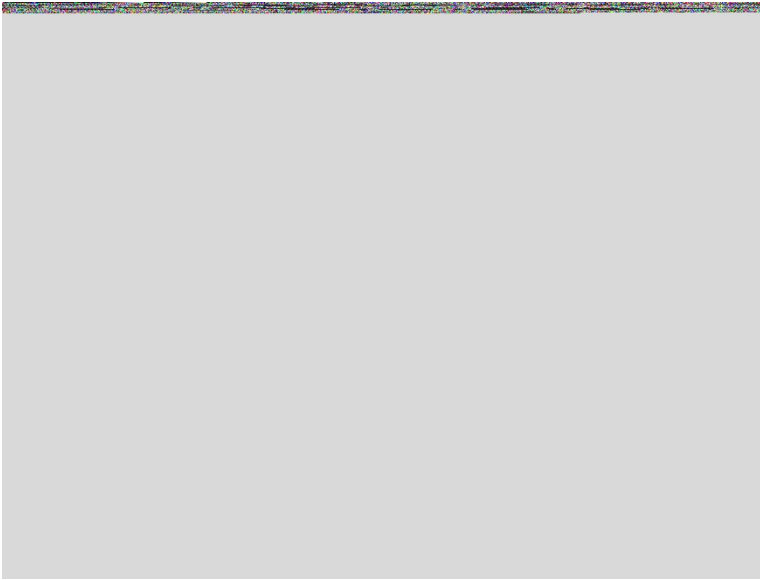

*Current Density 2*

### SELECTION

|                        |                                         |
|------------------------|-----------------------------------------|
| Geometric entity level | Boundary                                |
| Selection              | Geometry geom1: Dimension 1: Boundary 4 |

### EQUATIONS

$$-\mathbf{n} \cdot \mathbf{i} = i_0$$

**Inward current density**

### SETTINGS

| Description            | Value  |
|------------------------|--------|
| Inward current density | jssBPE |

**Variables**

| Name          | Expression | Unit             | Description            | Selection  |
|---------------|------------|------------------|------------------------|------------|
| npe.i0_cdens5 | jssBPE     | A/m <sup>2</sup> | Inward current density | Boundary 4 |

**Weak expressions**

| Weak expression       | Integration order | Integration frame | Selection  |
|-----------------------|-------------------|-------------------|------------|
| npe.i0_cdens5*test(V) | 4                 | Spatial           | Boundary 4 |

## 2.4.15 Reactions 1

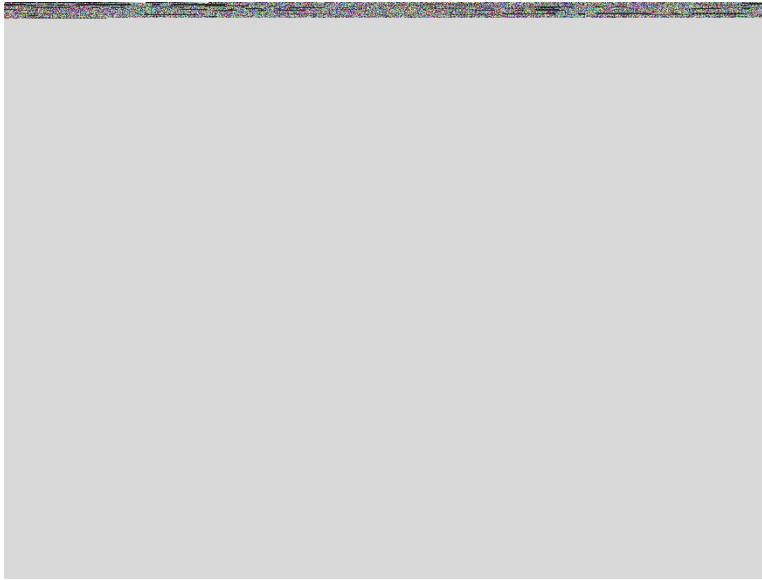

Reactions 1

### SELECTION

|                        |                                          |
|------------------------|------------------------------------------|
| Geometric entity level | Domain                                   |
| Selection              | Geometry geom1: Dimension 2:<br>Domain 1 |

### EQUATIONS

$$\nabla \cdot (\mathbf{J}_i + \mathbf{u}c_i) = R_i$$

$$\nabla \cdot \mathbf{i} = F \sum_i z_i R_i$$

### Reaction rates

#### SETTINGS

| Description           | Value                            |
|-----------------------|----------------------------------|
| Total rate expression | User defined                     |
| Total rate expression | kfhydro*cH2O0 - kbhydro*cH3O*cOH |
| Total rate expression | User defined                     |
| Total rate expression | kfhydro*cH2O0 - kbhydro*cH3O*cOH |
| Total rate expression | User defined                     |
| Total rate expression | 0                                |
| Total rate expression | User defined                     |
| Total rate expression | 0                                |



| Description           | Value        |
|-----------------------|--------------|
| Total rate expression | User defined |
| Total rate expression | 0            |

### Variables

| Name              | Expression          | Unit                    | Description           | Selection | Details     |
|-------------------|---------------------|-------------------------|-----------------------|-----------|-------------|
| npe.R_cH3O        | npe.reac1.R_cH3O    | mol/(m <sup>3</sup> ·s) | Total rate expression | Domain 1  | + operation |
| npe.R_cOH         | npe.reac1.R_cOH     | mol/(m <sup>3</sup> ·s) | Total rate expression | Domain 1  | + operation |
| npe.R_cBead       | npe.reac1.R_cBead   | mol/(m <sup>3</sup> ·s) | Total rate expression | Domain 1  | + operation |
| npe.R_cK          | npe.reac1.R_cK      | mol/(m <sup>3</sup> ·s) | Total rate expression | Domain 1  | + operation |
| npe.R_cCl         | npe.reac1.R_cCl     | mol/(m <sup>3</sup> ·s) | Total rate expression | Domain 1  | + operation |
| npe.reac1.R_cH3O  | model.input.R_cH3O  | mol/(m <sup>3</sup> ·s) | Total rate expression | Domain 1  | Meta        |
| npe.reac1.R_cOH   | model.input.R_cOH   | mol/(m <sup>3</sup> ·s) | Total rate expression | Domain 1  | Meta        |
| npe.reac1.R_cBead | model.input.R_cBead | mol/(m <sup>3</sup> ·s) | Total rate expression | Domain 1  | Meta        |
| npe.reac1.R_cK    | model.input.R_cK    | mol/(m <sup>3</sup> ·s) | Total rate expression | Domain 1  | Meta        |
| npe.reac1.R_cCl   | model.input.R_cCl   | mol/(m <sup>3</sup> ·s) | Total rate expression | Domain 1  | Meta        |

### Weak expressions

| Weak expression                               | Integration order | Integration frame | Selection |
|-----------------------------------------------|-------------------|-------------------|-----------|
| npe.reac1.R_cH3O*test(cH3O)                   | 4                 | Spatial           | Domain 1  |
| F_const*npe.reac1.R_cH3O*npe.z_cH3O*test(V)   | 4                 | Spatial           | Domain 1  |
| npe.reac1.R_cOH*test(cOH)                     | 4                 | Spatial           | Domain 1  |
| F_const*npe.reac1.R_cOH*npe.z_cOH*test(V)     | 4                 | Spatial           | Domain 1  |
| npe.reac1.R_cBead*test(cBead)                 | 4                 | Spatial           | Domain 1  |
| F_const*npe.reac1.R_cBead*npe.z_cBead*test(V) | 4                 | Spatial           | Domain 1  |

| Weak expression                           | Integration order | Integration frame | Selection |
|-------------------------------------------|-------------------|-------------------|-----------|
| npe.reac1.R_cK*test(cK)                   | 4                 | Spatial           | Domain 1  |
| F_const*npe.reac1.R_cK*npe.z_cK*test(V)   | 4                 | Spatial           | Domain 1  |
| F_const*npe.reac1.R_cCl*npe.z_cCl*test(V) | 4                 | Spatial           | Domain 1  |

## 2.5 LAMINAR FLOW

### USED PRODUCTS

|                                      |
|--------------------------------------|
| COMSOL Multiphysics                  |
| Chemical Reaction Engineering Module |



*Laminar Flow*

### SELECTION

|                        |                                          |
|------------------------|------------------------------------------|
| Geometric entity level | Domain                                   |
| Selection              | Geometry geom1: Dimension 2: All domains |

### EQUATIONS

$$\rho(\mathbf{u} \cdot \nabla)\mathbf{u} = \nabla \cdot [-p\mathbf{I} + \mathbf{K}] + \mathbf{F}$$

$$\rho \nabla \cdot \mathbf{u} = 0$$

## 2.5.1 Interface settings

### Discretization

#### SETTINGS

| Description              | Value   |
|--------------------------|---------|
| Discretization of fluids | P1 + P1 |

### Physical model

#### SETTINGS

| Description                         | Value               |
|-------------------------------------|---------------------|
| Neglect inertial term (Stokes flow) | Off                 |
| Compressibility                     | Incompressible flow |
| Enable porous media domains         | Off                 |
| Reference temperature               | User defined        |
| Reference temperature               | T                   |
| Reference pressure level            | 1[atm]              |

### Turbulence

#### SETTINGS

| Description           | Value |
|-----------------------|-------|
| Turbulence model type | None  |

## 2.5.2 Variables

| Name       | Expression                    | Unit | Description              | Selection       | Details |
|------------|-------------------------------|------|--------------------------|-----------------|---------|
| spf.Tref   | model.input.Tref              | K    | Reference temperature    | Global          | Meta    |
| spf.dz     | 1                             | m    | Thickness                | Domain 1        |         |
| spf.pref   | 1[atm]                        | Pa   | Reference pressure level | Domain 1        |         |
| spf.pA     | p+spf.pref                    | Pa   | Absolute pressure        | Domain 1        |         |
| spf.hasWF  | 0                             |      | Help variable            | Boundaries 1–12 |         |
| spf.dt_CFL | 1/max(spf.maxOp(sqrt(ematic_s | s    | Time step, CFL=1         | Global          |         |

| Name                      | Expression                                                                                                     | Unit | Description                | Selection       | Details     |
|---------------------------|----------------------------------------------------------------------------------------------------------------|------|----------------------------|-----------------|-------------|
|                           | patial(u-d(x,TIME),v-d(y,TIME))),eps)                                                                          |      |                            |                 |             |
| spf.usePseudoTimeStepping | 0                                                                                                              | 1    | Help variable              | Global          | + operation |
| spf.localCFLvalue         | 1.3^min(niterCMP,9)+if(niterCMP>=25,9*1.3^min(-25+niterCMP,9),0)+if(niterCMP>=45,90*1.3^min(-45+niterCMP,9),0) |      | Local CFL number           | Domain 1        |             |
| spf.locCFL                | CFLCMP                                                                                                         | 1    | Local CFL number           | Domain 1        |             |
| spf.geometryLengthScale   | 4.216500000000001E-4                                                                                           | m    | Geometry length scale      | Domain 1        |             |
| spf.time_step_inv         | max(sqrt(ematic_spatial(u,v)*2^gmg_level^2),spf.nu/spf.geometryLengthScale^2)                                  | Hz   | Inverse time step          | Domain 1        |             |
| spf.tsti                  | nojac(spf.time_step_inv/spf.locCFL)                                                                            | 1/s  | Help variable              | Domain 1        |             |
| spf.nx                    | dnx                                                                                                            | 1    | Normal vector, x component | Boundaries 1–12 |             |
| spf.ny                    | dny                                                                                                            | 1    | Normal vector, y component | Boundaries 1–12 |             |
| spf.nz                    | 0                                                                                                              | 1    | Normal vector, z component | Boundaries 1–12 |             |
| spf.nxmesh                | dnxmesh                                                                                                        | 1    | Normal vector, x component | Boundaries 1–12 |             |
| spf.nymesh                | dnymesh                                                                                                        | 1    | Normal vector, y           | Boundaries 1–12 |             |

| Name       | Expression | Unit | Description                | Selection       | Details |
|------------|------------|------|----------------------------|-----------------|---------|
|            |            |      | component                  |                 |         |
| spf.nzmesh | 0          | 1    | Normal vector, z component | Boundaries 1–12 |         |

### 2.5.3 Fluid Properties 1

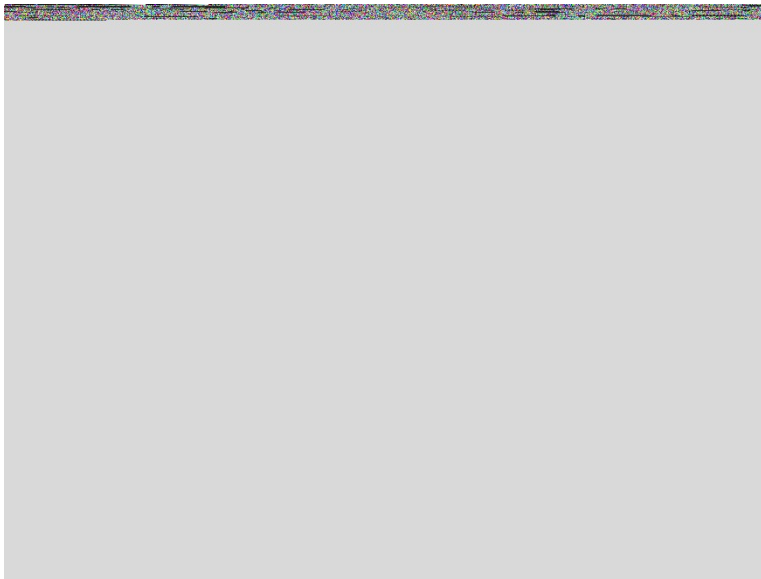

*Fluid Properties 1*

#### SELECTION

|                        |                                          |
|------------------------|------------------------------------------|
| Geometric entity level | Domain                                   |
| Selection              | Geometry geom1: Dimension 2: All domains |

#### EQUATIONS

$$\rho(\mathbf{u} \cdot \nabla)\mathbf{u} = \nabla \cdot [-p\mathbf{I} + \mathbf{K}] + \mathbf{F}$$

$$\rho \nabla \cdot \mathbf{u} = 0$$

$$\mathbf{K} = \mu(\nabla \mathbf{u} + (\nabla \mathbf{u})^T)$$

#### Fluid properties

##### SETTINGS

| Description       | Value         |
|-------------------|---------------|
| Density           | From material |
|                   | Newtonian     |
| Dynamic viscosity | From material |

## Model input

### SETTINGS

| Description | Value              |
|-------------|--------------------|
| Temperature | Common model input |

### USED PRODUCTS

|                     |
|---------------------|
| COMSOL Multiphysics |
|---------------------|

### PROPERTIES FROM MATERIAL

| Property          | Material | Property group |
|-------------------|----------|----------------|
| Density           | Water    | Basic          |
| Dynamic viscosity | Water    | Basic          |

## Variables

| Name       | Expression                                                                                   | Unit              | Description                            | Selection | Details |
|------------|----------------------------------------------------------------------------------------------|-------------------|----------------------------------------|-----------|---------|
| spf.mu     | material.mu                                                                                  | Pa·s              | Dynamic viscosity                      | Domain 1  | Meta    |
| spf.rho    | subst(material.rho,spf.fp1.mininput_temperature,spf.Trho,spf.fp1.mininput_pressure,spf.prho) | kg/m <sup>3</sup> | Density                                | Domain 1  | Meta    |
| spf.Trho   | spf.Tref                                                                                     | K                 | Temperature for density evaluation     | Domain 1  |         |
| spf.prho   | spf.pref                                                                                     | Pa                | Pressure for the evaluation of density | Domain 1  |         |
| spf.rhoref | subst(material.rho,spf.fp1.mininput_temperature,spf.Tref,spf.fp1.mininput_pressure,spf.pref) | kg/m <sup>3</sup> | Reference density                      | Domain 1  | Meta    |

| Name       | Expression  | Unit | Description                        | Selection | Details |
|------------|-------------|------|------------------------------------|-----------|---------|
| spf.mumat  | material.mu | Pa·s | Dynamic viscosity                  | Domain 1  | Meta    |
| spf.srijxx | ux          | 1/s  | Strain rate tensor, xx component   | Domain 1  |         |
| spf.srijyx | 0.5*(vx+uy) | 1/s  | Strain rate tensor, yx component   | Domain 1  |         |
| spf.srijzx | 0           | 1/s  | Strain rate tensor, zx component   | Domain 1  |         |
| spf.srijxy | 0.5*(uy+vx) | 1/s  | Strain rate tensor, xy component   | Domain 1  |         |
| spf.srijyy | vy          | 1/s  | Strain rate tensor, yy component   | Domain 1  |         |
| spf.srijzy | 0           | 1/s  | Strain rate tensor, zy component   | Domain 1  |         |
| spf.srijxz | 0           | 1/s  | Strain rate tensor, xz component   | Domain 1  |         |
| spf.srijyz | 0           | 1/s  | Strain rate tensor, yz component   | Domain 1  |         |
| spf.srijzz | 0           | 1/s  | Strain rate tensor, zz component   | Domain 1  |         |
| spf.rrijxx | 0           | 1/s  | Rotation rate tensor, xx component | Domain 1  |         |
| spf.rrijyx | 0.5*(vx-uy) | 1/s  | Rotation rate tensor, yx component | Domain 1  |         |
| spf.rrijzx | 0           | 1/s  | Rotation rate tensor, zx component | Domain 1  |         |
| spf.rrijxy | 0.5*(uy-vx) | 1/s  | Rotation rate tensor,              | Domain 1  |         |

| Name       | Expression                                                                                                                                                                                                                                                                                      | Unit | Description                        | Selection | Details |
|------------|-------------------------------------------------------------------------------------------------------------------------------------------------------------------------------------------------------------------------------------------------------------------------------------------------|------|------------------------------------|-----------|---------|
|            |                                                                                                                                                                                                                                                                                                 |      | xy component                       |           |         |
| spf.rrijyy | 0                                                                                                                                                                                                                                                                                               | 1/s  | Rotation rate tensor, yy component | Domain 1  |         |
| spf.rrijzy | 0                                                                                                                                                                                                                                                                                               | 1/s  | Rotation rate tensor, zy component | Domain 1  |         |
| spf.rrijxz | 0                                                                                                                                                                                                                                                                                               | 1/s  | Rotation rate tensor, xz component | Domain 1  |         |
| spf.rrijyz | 0                                                                                                                                                                                                                                                                                               | 1/s  | Rotation rate tensor, yz component | Domain 1  |         |
| spf.rrijzz | 0                                                                                                                                                                                                                                                                                               | 1/s  | Rotation rate tensor, zz component | Domain 1  |         |
| spf.sr     | $\sqrt{2 \cdot \text{spf.srijxx}^2 + 2 \cdot \text{spf.srijxy}^2 + 2 \cdot \text{spf.srijxz}^2 + 2 \cdot \text{spf.srijyx}^2 + 2 \cdot \text{spf.srijyy}^2 + 2 \cdot \text{spf.srijyz}^2 + 2 \cdot \text{spf.srijzx}^2 + 2 \cdot \text{spf.srijzy}^2 + 2 \cdot \text{spf.srijzz}^2 + \epsilon}$ | 1/s  | Shear rate                         | Domain 1  |         |
| spf.rr     | $\sqrt{2 \cdot \text{spf.rrijxx}^2 + 2 \cdot \text{spf.rrijxy}^2 + 2 \cdot \text{spf.rrijxz}^2 + 2 \cdot \text{spf.rrijyx}^2 + 2 \cdot \text{spf.rrijyy}^2 + 2 \cdot \text{spf.rrijyz}^2 + 2 \cdot \text{spf.rrijzx}^2 + 2 \cdot \text{spf.rrijzy}^2 + 2 \cdot \text{spf.rrijzz}^2 + \epsilon}$ | 1/s  | Rotation rate                      | Domain 1  |         |



| Name           | Expression                                                                                                                                        | Unit                   | Description                            | Selection | Details     |
|----------------|---------------------------------------------------------------------------------------------------------------------------------------------------|------------------------|----------------------------------------|-----------|-------------|
|                | ps)                                                                                                                                               |                        |                                        |           |             |
| spf.divu       | $u_x + v_y$                                                                                                                                       | 1/s                    | Divergence of velocity field           | Domain 1  |             |
| spf.Fx         | 0                                                                                                                                                 | N/m <sup>3</sup>       | Volume force, x component              | Domain 1  | + operation |
| spf.Fy         | 0                                                                                                                                                 | N/m <sup>3</sup>       | Volume force, y component              | Domain 1  | + operation |
| spf.Fz         | 0                                                                                                                                                 | N/m <sup>3</sup>       | Volume force, z component              | Domain 1  | + operation |
| spf.U          | $\sqrt{u^2 + v^2}$                                                                                                                                | m/s                    | Velocity magnitude                     | Domain 1  |             |
| spf.vorticityx | 0                                                                                                                                                 | 1/s                    | Vorticity field, x component           | Domain 1  |             |
| spf.vorticityy | 0                                                                                                                                                 | 1/s                    | Vorticity field, y component           | Domain 1  |             |
| spf.vorticityz | $v_x - u_y$                                                                                                                                       | 1/s                    | Vorticity field, z component           | Domain 1  |             |
| spf.vort_magn  | $\sqrt{\text{spf.vorticityx}^2 + \text{spf.vorticityy}^2 + \text{spf.vorticityz}^2}$                                                              | 1/s                    | Vorticity magnitude                    | Domain 1  |             |
| spf.cellRe     | $0.25 * \text{spf.rho} * \sqrt{\text{emetric\_spatial}(u - d(x, \text{TIME}), v - d(y, \text{TIME})) / \text{emetric2\_spatial}} / \text{spf.mu}$ | 1                      | Cell Reynolds number                   | Domain 1  |             |
| spf.nu         | $\text{spf.mu} / \text{spf.rho}$                                                                                                                  | m <sup>2</sup> /s      | Kinematic viscosity                    | Domain 1  |             |
| spf.betaT      | 0                                                                                                                                                 | 1/Pa                   | Isothermal compressibility coefficient | Domain 1  |             |
| spf.Qm         | 0                                                                                                                                                 | kg/(m <sup>3</sup> .s) | Source term                            | Domain 1  | + operation |

| Name                  | Expression                                      | Unit             | Description                         | Selection       | Details     |
|-----------------------|-------------------------------------------------|------------------|-------------------------------------|-----------------|-------------|
|                       |                                                 |                  |                                     |                 | on          |
| spf.Fgtotx            | 0                                               | N/m <sup>3</sup> | Gravity force, x component          | Domain 1        | + operation |
| spf.Fgoty             | 0                                               | N/m <sup>3</sup> | Gravity force, y component          | Domain 1        | + operation |
| spf.Fgotz             | 0                                               | N/m <sup>3</sup> | Gravity force, z component          | Domain 1        | + operation |
| spf.mu_eff            | spf.mu+spf.muT                                  | Pa·s             | Dynamic viscosity                   | Domain 1        |             |
| spf.muT               | 0                                               | Pa·s             | Turbulent dynamic viscosity         | Domain 1        |             |
| spf.T_stressx         | spf.K_stressx - p*spf.nxmesh                    | N/m <sup>2</sup> | Total stress, x component           | Boundaries 1–12 | + operation |
| spf.T_stressy         | spf.K_stressy - p*spf.nymesh                    | N/m <sup>2</sup> | Total stress, y component           | Boundaries 1–12 | + operation |
| spf.T_stressz         | spf.K_stressz - p*spf.nzmesh                    | N/m <sup>2</sup> | Total stress, z component           | Boundaries 1–12 | + operation |
| spf.K_stressx         | spf.mu_eff*(2*ux*spf.nxmesh+(uy+vx)*spf.nymesh) | N/m <sup>2</sup> | Viscous stress, x component         | Boundaries 1–12 | + operation |
| spf.K_stressy         | spf.mu_eff*((vx+uy)*spf.nxmesh+2*vy*spf.nymesh) | N/m <sup>2</sup> | Viscous stress, y component         | Boundaries 1–12 | + operation |
| spf.K_stressz         | 0                                               | N/m <sup>2</sup> | Viscous stress, z component         | Boundaries 1–12 | + operation |
| spf.K_stress_tensorxx | 2*spf.mu_eff*ux                                 | N/m <sup>2</sup> | Viscous stress tensor, xx component | Domain 1        | + operation |

| Name                           | Expression                             | Unit             | Description                                          | Selection | Details         |
|--------------------------------|----------------------------------------|------------------|------------------------------------------------------|-----------|-----------------|
| spf.K_stress_tensoryx          | spf.mu_eff*(v<br>x+uy)                 | N/m <sup>2</sup> | Viscous<br>stress<br>tensor, yx<br>component         | Domain 1  | + operati<br>on |
| spf.K_stress_tensorzx          | 0                                      | N/m <sup>2</sup> | Viscous<br>stress<br>tensor, zx<br>component         | Domain 1  | + operati<br>on |
| spf.K_stress_tensoryy          | spf.mu_eff*(<br>uy+vx)                 | N/m <sup>2</sup> | Viscous<br>stress<br>tensor, xy<br>component         | Domain 1  | + operati<br>on |
| spf.K_stress_tensoryy          | 2*spf.mu_eff<br>*vy                    | N/m <sup>2</sup> | Viscous<br>stress<br>tensor, yy<br>component         | Domain 1  | + operati<br>on |
| spf.K_stress_tensoryz          | 0                                      | N/m <sup>2</sup> | Viscous<br>stress<br>tensor, zy<br>component         | Domain 1  | + operati<br>on |
| spf.K_stress_tensorzx          | 0                                      | N/m <sup>2</sup> | Viscous<br>stress<br>tensor, xz<br>component         | Domain 1  | + operati<br>on |
| spf.K_stress_tensoryz          | 0                                      | N/m <sup>2</sup> | Viscous<br>stress<br>tensor, yz<br>component         | Domain 1  | + operati<br>on |
| spf.K_stress_tensorz           | 0                                      | N/m <sup>2</sup> | Viscous<br>stress<br>tensor, zz<br>component         | Domain 1  | + operati<br>on |
| spf.K_stress_tensor_testx<br>x | 2*spf.mu_eff<br>*test(ux)              | N/m <sup>2</sup> | Viscous<br>stress<br>tensor test,<br>xx<br>component | Domain 1  | + operati<br>on |
| spf.K_stress_tensor_testy<br>x | spf.mu_eff*(t<br>est(vx)+test(<br>uy)) | N/m <sup>2</sup> | Viscous<br>stress<br>tensor test,<br>yx<br>component | Domain 1  | + operati<br>on |
| spf.K_stress_tensor_testz      | 0                                      | N/m <sup>2</sup> | Viscous<br>stress                                    | Domain 1  | + operati<br>on |

| Name                       | Expression                     | Unit             | Description                              | Selection | Details     |
|----------------------------|--------------------------------|------------------|------------------------------------------|-----------|-------------|
| x                          |                                |                  | tensor test, zx component                |           |             |
| spf.K_stress_tensor_testxy | spf.mu_eff*(test(uy)+test(vx)) | N/m <sup>2</sup> | Viscous stress tensor test, xy component | Domain 1  | + operation |
| spf.K_stress_tensor_testyy | 2*spf.mu_eff*test(vy)          | N/m <sup>2</sup> | Viscous stress tensor test, yy component | Domain 1  | + operation |
| spf.K_stress_tensor_testzy | 0                              | N/m <sup>2</sup> | Viscous stress tensor test, zy component | Domain 1  | + operation |
| spf.K_stress_tensor_testxz | 0                              | N/m <sup>2</sup> | Viscous stress tensor test, xz component | Domain 1  | + operation |
| spf.K_stress_tensor_testyz | 0                              | N/m <sup>2</sup> | Viscous stress tensor test, yz component | Domain 1  | + operation |
| spf.K_stress_tensor_testzz | 0                              | N/m <sup>2</sup> | Viscous stress tensor test, zz component | Domain 1  | + operation |
| spf.upwind_helpx           | u-d(x,TIME)                    | m/s              | Upwind term, x component                 | Domain 1  | + operation |
| spf.upwind_helpy           | v-d(y,TIME)                    | m/s              | Upwind term, y component                 | Domain 1  | + operation |
| spf.upwind_helpz           | 0                              | m/s              | Upwind term, z component                 | Domain 1  | + operation |
| spf.tau_vdxx               | 2*spf.mu*spf.srijxx            | Pa               | Viscous stress                           | Domain 1  | + operation |

| Name              | Expression                                                        | Unit             | Description                         | Selection | Details     |
|-------------------|-------------------------------------------------------------------|------------------|-------------------------------------|-----------|-------------|
|                   |                                                                   |                  | tensor, xx component                |           |             |
| spf.tau_vdyx      | $2*spf.mu*spf.srijyx$                                             | Pa               | Viscous stress tensor, yx component | Domain 1  | + operation |
| spf.tau_vdzx      | $2*spf.mu*spf.srijzx$                                             | Pa               | Viscous stress tensor, zx component | Domain 1  | + operation |
| spf.tau_vdxy      | $2*spf.mu*spf.srijxy$                                             | Pa               | Viscous stress tensor, xy component | Domain 1  | + operation |
| spf.tau_vdyy      | $2*spf.mu*spf.srijyy$                                             | Pa               | Viscous stress tensor, yy component | Domain 1  | + operation |
| spf.tau_vdzy      | $2*spf.mu*spf.srijzy$                                             | Pa               | Viscous stress tensor, zy component | Domain 1  | + operation |
| spf.tau_vdxz      | $2*spf.mu*spf.srijxz$                                             | Pa               | Viscous stress tensor, xz component | Domain 1  | + operation |
| spf.tau_vdyz      | $2*spf.mu*spf.srijyz$                                             | Pa               | Viscous stress tensor, yz component | Domain 1  | + operation |
| spf.tau_vdzz      | $2*spf.mu*spf.srijzz$                                             | Pa               | Viscous stress tensor, zz component | Domain 1  | + operation |
| spf.Qvd           | $spf.tau_vdxx*ux+spf.tau_vdxy*uy+spf.tau_vdyy*vy+spf.tau_vdzy*vz$ | W/m <sup>3</sup> | Viscous dissipation                 | Domain 1  | + operation |
| spf.epsilon_p     | 1                                                                 | 1                | Porosity                            | Domain 1  |             |
| spf.Fst_tensorrxx | 0                                                                 | N/m <sup>2</sup> | Surface tension                     | Domain 1  | + operation |

| Name                   | Expression                                                        | Unit                   | Description                         | Selection | Details     |
|------------------------|-------------------------------------------------------------------|------------------------|-------------------------------------|-----------|-------------|
|                        |                                                                   |                        | force, xx component                 |           |             |
| spf.Fst_tensoryx       | 0                                                                 | N/m <sup>2</sup>       | Surface tension force, yx component | Domain 1  | + operation |
| spf.Fst_tensorzx       | 0                                                                 | N/m <sup>2</sup>       | Surface tension force, zx component | Domain 1  | + operation |
| spf.Fst_tensoryy       | 0                                                                 | N/m <sup>2</sup>       | Surface tension force, yy component | Domain 1  | + operation |
| spf.Fst_tensoryz       | 0                                                                 | N/m <sup>2</sup>       | Surface tension force, zy component | Domain 1  | + operation |
| spf.Fst_tensorz        | 0                                                                 | N/m <sup>2</sup>       | Surface tension force, xz component | Domain 1  | + operation |
| spf.Fst_tensoryz       | 0                                                                 | N/m <sup>2</sup>       | Surface tension force, yz component | Domain 1  | + operation |
| spf.Fst_tensorz        | 0                                                                 | N/m <sup>2</sup>       | Surface tension force, zz component | Domain 1  | + operation |
| spf.continuityEquation | spf.rho*spf.divu                                                  | kg/(m <sup>3</sup> .s) | Continuity equation                 | Domain 1  |             |
| spf.contCoeff          | spf.rho                                                           | kg/m <sup>3</sup>      | Help variable                       | Domain 1  |             |
| spf.res_u              | px+spf.rho*u*ux+spf.rho*v*uy-(d(2*ux,x)+d(uy+vx,y))*spf.mu-spf.Fx | N/m <sup>3</sup>       | Equation residual                   | Domain 1  |             |

| Name      | Expression                                                                            | Unit                   | Description                      | Selection | Details |
|-----------|---------------------------------------------------------------------------------------|------------------------|----------------------------------|-----------|---------|
| spf.res_v | spf.rho*u*vx<br>+py+spf.rho<br>*v*vy-<br>(d(vx+uy,x)+<br>d(2*vy,y))*sp<br>f.mu-spf.Fy | N/m <sup>3</sup>       | Equation<br>residual             | Domain 1  |         |
| spf.res_p | spf.rho*spf.d<br>ivu                                                                  | kg/(m <sup>3</sup> .s) | Pressure<br>equation<br>residual | Domain 1  |         |

### Shape functions

| Name | Shape function       | Unit | Description                    | Shape frame | Selection |
|------|----------------------|------|--------------------------------|-------------|-----------|
| u    | Lagrange<br>(Linear) | m/s  | Velocity field, x<br>component | Spatial     | Domain 1  |
| v    | Lagrange<br>(Linear) | m/s  | Velocity field, y<br>component | Spatial     | Domain 1  |
| p    | Lagrange<br>(Linear) | Pa   | Pressure                       | Spatial     | Domain 1  |

### Weak expressions

| Weak expression                                                                                                                                                 | Integration order | Integration frame | Selection |
|-----------------------------------------------------------------------------------------------------------------------------------------------------------------|-------------------|-------------------|-----------|
| (p-<br>spf.K_stress_tensorxx)*test(ux)<br>-<br>spf.K_stress_tensorxy*test(uy)<br>-<br>spf.K_stress_tensoryx*test(vx)<br>+(p-<br>spf.K_stress_tensoryy)*test(vy) | 2                 | Spatial           | Domain 1  |
| spf.Fx*test(u)+spf.Fy*test(v)                                                                                                                                   | 2                 | Spatial           | Domain 1  |
| spf.rho*(-<br>(d(u,x)*u+d(u,y)*v)*test(u)-<br>(d(v,x)*u+d(v,y)*v)*test(v))                                                                                      | 2                 | Spatial           | Domain 1  |
| -<br>spf.continuityEquation*test(p)                                                                                                                             | 2                 | Spatial           | Domain 1  |
| spf.streamlinens                                                                                                                                                | 2                 | Spatial           | Domain 1  |
| (spf.usePseudoTimeStepping<br>>0)*spf.rho*spf.tsti*(-(u-<br>nojac(u))*test(u)-(v-<br>nojac(v))*test(v))                                                         | 2                 | Spatial           | Domain 1  |

## 2.5.4 Initial Values 1

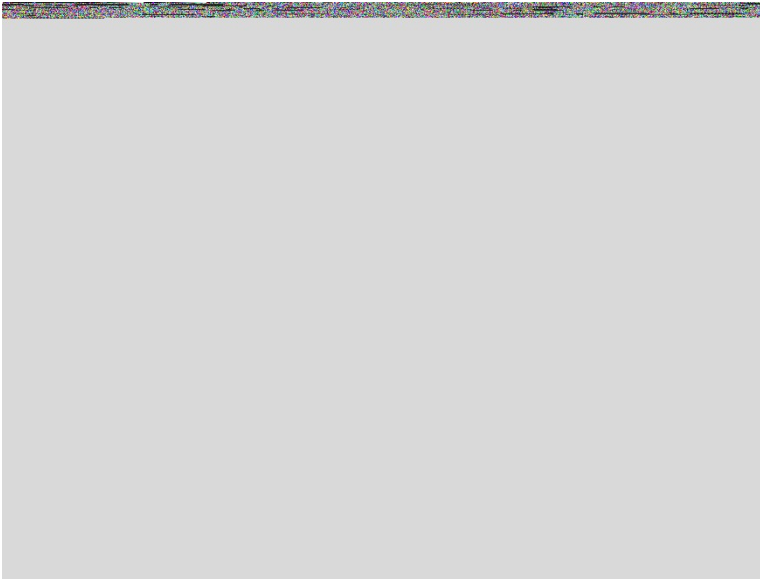

*Initial Values 1*

### SELECTION

|                        |                                          |
|------------------------|------------------------------------------|
| Geometric entity level | Domain                                   |
| Selection              | Geometry geom1: Dimension 2: All domains |

### Initial values

#### SETTINGS

| Description                 | Value |
|-----------------------------|-------|
| Velocity field, x component | 0     |
| Velocity field, y component | 0     |
| Velocity field, z component | 0     |
| Pressure                    | 0     |

### Coordinate system selection

#### SETTINGS

| Description       | Value                    |
|-------------------|--------------------------|
| Coordinate system | Global coordinate system |

#### USED PRODUCTS

|                        |
|------------------------|
| COMSOL<br>Multiphysics |
|------------------------|



## Variables

| Name        | Expression | Unit | Description                 | Selection |
|-------------|------------|------|-----------------------------|-----------|
| spf.u_initx | 0          | m/s  | Velocity field, x component | Domain 1  |
| spf.u_inity | 0          | m/s  | Velocity field, y component | Domain 1  |
| spf.u_initz | 0          | m/s  | Velocity field, z component | Domain 1  |
| spf.p_init  | 0          | Pa   | Pressure                    | Domain 1  |

## 2.5.5 Wall 1

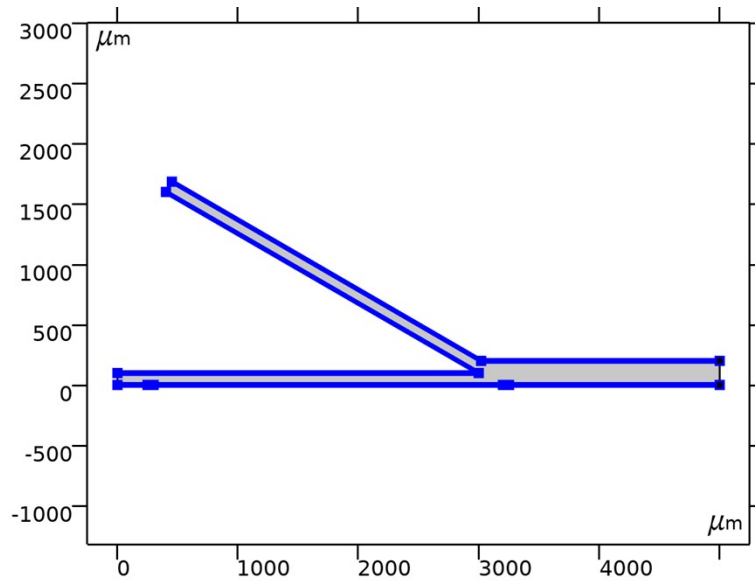

Wall 1

### SELECTION

|                        |                                             |
|------------------------|---------------------------------------------|
| Geometric entity level | Boundary                                    |
| Selection              | Geometry geom1: Dimension 1: All boundaries |

### EQUATIONS

$$\mathbf{u} = \mu_{eo} \mathbf{E}_t$$

$$\mu_{eo} = -\frac{\epsilon_r \epsilon_0 \zeta}{\mu}, \quad \mathbf{E}_t = \mathbf{E} - (\mathbf{E} \cdot \mathbf{n})\mathbf{n}$$

## Boundary condition

### SETTINGS

| Description    | Value                         |
|----------------|-------------------------------|
| Wall condition | Electroosmotic velocity       |
| Electric field | User defined                  |
| Electric field | {-npe.gradVx, -npe.gradVy, 0} |

| Description             | Value                 |
|-------------------------|-----------------------|
| Electroosmotic mobility | Built - in expression |
| Zeta potential          | -(0.080)[V]           |
| Relative permittivity   | 80                    |

## Wall movement

### SETTINGS

| Description            | Value                |
|------------------------|----------------------|
| Translational velocity | Automatic from frame |
| Sliding wall           | Off                  |

## Variables

| Name                 | Expression                                                                                                                            | Unit             | Description                                  | Selection            | Details |
|----------------------|---------------------------------------------------------------------------------------------------------------------------------------|------------------|----------------------------------------------|----------------------|---------|
| spf.KStressn_avx     | spf.K_stress_tens<br>orxx*spf.nxmesh<br>+spf.K_stress_tens<br>orxy*spf.nymesh<br>+spf.K_stress_tens<br>orz*spf.nzmesh                 | N/m <sup>2</sup> | Average<br>viscous<br>stress, x<br>component | Boundaries 2-5, 7-11 |         |
| spf.KStressn_avy     | spf.K_stress_tens<br>oryx*spf.nxmesh<br>+spf.K_stress_tens<br>oryy*spf.nymesh<br>+spf.K_stress_tens<br>oryz*spf.nzmesh                | N/m <sup>2</sup> | Average<br>viscous<br>stress, y<br>component | Boundaries 2-5, 7-11 |         |
| spf.KStressn_avz     | spf.K_stress_tens<br>orz*spf.nxmesh<br>+spf.K_stress_tens<br>orzy*spf.nymesh<br>+spf.K_stress_tens<br>orz*spf.nzmesh                  | N/m <sup>2</sup> | Average<br>viscous<br>stress, z<br>component | Boundaries 2-5, 7-11 |         |
| spf.KStressTestn_avx | spf.K_stress_tens<br>or_testxx*spf.nx<br>mesh+spf.K_stress_tens<br>or_testxy*spf.nymesh+spf.K_stress_tens<br>or_testxz*spf.nz<br>mesh | N/m <sup>2</sup> | Average<br>viscous<br>stress, x<br>component | Boundaries 2-5, 7-11 |         |
| spf.KStressTestn_ave | spf.K_stress_tens                                                                                                                     | N/m <sup>2</sup> | Average                                      | Boundaries           |         |

| Name                     | Expression                                                                                                                                    | Unit              | Description                                  | Selection                    | Details |
|--------------------------|-----------------------------------------------------------------------------------------------------------------------------------------------|-------------------|----------------------------------------------|------------------------------|---------|
| stn_avy                  | or_testyx*spf.nx<br>mesh+spf.K_stre<br>ss_tensor_testy<br>*spf.nymesh+sp<br>f.K_stress_tensor<br>_testyz*spf.nzm<br>esh                       |                   | viscous<br>stress, y<br>component            | s 2-5, 7-<br>11              |         |
| spf.KStressTe<br>stn_avz | spf.K_stress_tens<br>or_testzx*spf.nx<br>mesh+spf.K_stre<br>ss_tensor_testzy<br>*spf.nymesh+sp<br>f.K_stress_tensor<br>_testzz*spf.nzm<br>esh | N/m <sup>2</sup>  | Average<br>viscous<br>stress, z<br>component | Boundarie<br>s 2-5, 7-<br>11 |         |
| spf.ujumpx               | spf.u_herex-<br>spf.u_therex                                                                                                                  | m/s               | Velocity<br>jump, x<br>component             | Boundarie<br>s 2-5, 7-<br>11 |         |
| spf.ujumpy               | spf.u_herey-<br>spf.u_therey                                                                                                                  | m/s               | Velocity<br>jump, y<br>component             | Boundarie<br>s 2-5, 7-<br>11 |         |
| spf.ujumpz               | spf.u_herez-<br>spf.u_therez                                                                                                                  | m/s               | Velocity<br>jump, z<br>component             | Boundarie<br>s 2-5, 7-<br>11 |         |
| spf.meshVol              | meshvol_spatial                                                                                                                               | m                 |                                              | Boundarie<br>s 2-5, 7-<br>11 |         |
| spf.meshVoll<br>nt       | down(meshvol_s<br>patial)                                                                                                                     | m <sup>2</sup>    | Volume of<br>interior<br>mesh<br>element     | Boundarie<br>s 2-5, 7-<br>11 |         |
| spf.c_here               | 24*nojac(down(<br>spf.mu))*spf.me<br>shVol/spf.mesh<br>Vollnt                                                                                 | 1                 | Intermediate<br>variable                     | Boundarie<br>s 2-5, 7-<br>11 |         |
| spf.sigma_dg<br>_ns      | 4*spf.c_here                                                                                                                                  | Pa·s/m            |                                              | Boundarie<br>s 2-5, 7-<br>11 |         |
| spf.rhoFace              | down(spff.rho)                                                                                                                                | kg/m <sup>3</sup> | Density face<br>value                        | Boundarie<br>s 2-5, 7-<br>11 |         |
| spf.umxTnFa<br>ce        | (spf.upwind_hel<br>px*spf.nxmesh+<br>spf.upwind_help                                                                                          | m/s               | Relative<br>velocity on<br>face              | Boundarie<br>s 2-5, 7-<br>11 |         |

| Name          | Expression                                                                                                                        | Unit | Description                           | Selection            | Details |
|---------------|-----------------------------------------------------------------------------------------------------------------------------------|------|---------------------------------------|----------------------|---------|
|               | y*spf.nymesh+spf.upwind_helpz*spf.nzmesh<0)*(spf.upwind_helpx*spf.nymesh+spf.upwind_helpy*spf.nymesh+spf.upwind_helpz*spf.nzmesh) |      |                                       |                      |         |
| spf.upwind_ns | spf.rhoFace*spf.umxTnFace*(spf.ujumpx*test(spfu_herex)+spf.ujumpy*test(spfu_herey)+spf.ujumpz*test(spfu_herez))                   | Pa   | Upwind term                           | Boundaries 2-5, 7-11 |         |
| spf.zeta      | (-0.08)[V]                                                                                                                        | V    | Zeta potential                        | Boundaries 2-5, 7-11 |         |
| spf.epsilonr  | 80                                                                                                                                | 1    | Relative permittivity                 | Boundaries 2-5, 7-11 |         |
| spf.ubndx     | spf.ueox+spf.utr <sub>x</sub> +spf.usx                                                                                            | m/s  | Velocity at boundary, x component     | Boundaries 2-5, 7-11 |         |
| spf.ubndy     | spf.ueoy+spf.utr <sub>y</sub> +spf.usy                                                                                            | m/s  | Velocity at boundary, y component     | Boundaries 2-5, 7-11 |         |
| spf.ubndz     | spf.ueoz+spf.utr <sub>z</sub> +spf.usz                                                                                            | m/s  | Velocity at boundary, z component     | Boundaries 2-5, 7-11 |         |
| spf.usx       | 0                                                                                                                                 | m/s  | Velocity of sliding wall, x component | Boundaries 2-5, 7-11 |         |
| spf.usy       | 0                                                                                                                                 | m/s  | Velocity of sliding wall, y component | Boundaries 2-5, 7-11 |         |
| spf.usz       | 0                                                                                                                                 | m/s  | Velocity of sliding wall, z component | Boundaries 2-5, 7-11 |         |

| Name                      | Expression                                                                          | Unit                  | Description                          | Selection            | Details     |
|---------------------------|-------------------------------------------------------------------------------------|-----------------------|--------------------------------------|----------------------|-------------|
| spf.utrx                  | 0                                                                                   | m/s                   | Velocity of moving wall, x component | Boundaries 2-5, 7-11 |             |
| spf.utry                  | 0                                                                                   | m/s                   | Velocity of moving wall, y component | Boundaries 2-5, 7-11 |             |
| spf.utrz                  | 0                                                                                   | m/s                   | Velocity of moving wall, z component | Boundaries 2-5, 7-11 |             |
| spf.uLeakage <sub>x</sub> | 0                                                                                   | m/s                   | Leakage velocity, x component        | Boundaries 2-5, 7-11 | + operation |
| spf.uLeakage <sub>y</sub> | 0                                                                                   | m/s                   | Leakage velocity, y component        | Boundaries 2-5, 7-11 | + operation |
| spf.uLeakage <sub>z</sub> | 0                                                                                   | m/s                   | Leakage velocity, z component        | Boundaries 2-5, 7-11 | + operation |
| spf.Ex                    | model.input.E1                                                                      | V/m                   | Electric field, x component          | Boundaries 2-5, 7-11 | Meta        |
| spf.Ey                    | model.input.E2                                                                      | V/m                   | Electric field, y component          | Boundaries 2-5, 7-11 | Meta        |
| spf.Ez                    | model.input.E3                                                                      | V/m                   | Electric field, z component          | Boundaries 2-5, 7-11 | Meta        |
| spf.mueo                  | - spf.zeta*epsilon <sub>0</sub> _const*spf.epsilonr/spf.mu                          | m <sup>2</sup> /(V·s) | Electroosmotic mobility              | Boundaries 2-5, 7-11 |             |
| spf.ueox                  | (spf.Ex-spfnxmesh*(spf.nxmesh*spf.Ex+spf.nymesh*spf.Ey+spf.nzmesh*spf.Ez))*spf.mueo | m/s                   | Electroosmotic velocity, x component | Boundaries 2-5, 7-11 |             |
| spf.ueoy                  | (spf.Ey-spfnymesh*(spf.nxmesh*spf.Ex+                                               | m/s                   | Electroosmotic velocity, y           | Boundaries 2-5, 7-   |             |

| Name              | Expression                                                                                    | Unit                                               | Description                          | Selection            | Details     |
|-------------------|-----------------------------------------------------------------------------------------------|----------------------------------------------------|--------------------------------------|----------------------|-------------|
|                   | spf.nymesh*spf.Ey+spf.nzmesh*spf.Ez))*spf.mu_eo                                               |                                                    | component                            | 11                   |             |
| spf.ueoz          | (spf.Ez-spfnzmesh*(spf.nxmesh*spf.Ex+spf.nymesh*spf.Ey+spf.nzmesh*spf.Ez))*spf.mu_eo          | m/s                                                | Electroosmotic velocity, z component | Boundaries 2-5, 7-11 |             |
| spf.u_herex       | u                                                                                             | m/s                                                | Intermediate variable, x component   | Boundaries 2-5, 7-11 |             |
| spf.u_herey       | v                                                                                             | m/s                                                | Intermediate variable, y component   | Boundaries 2-5, 7-11 |             |
| spf.u_herez       | 0                                                                                             | m/s                                                | Intermediate variable, z component   | Boundaries 2-5, 7-11 |             |
| spf.u_therex      | spf.ubndx+spf.uLeakagex                                                                       | m/s                                                | Intermediate variable, x component   | Boundaries 2-5, 7-11 |             |
| spf.u_therey      | spf.ubndy+spf.uLeakagey                                                                       | m/s                                                | Intermediate variable, y component   | Boundaries 2-5, 7-11 |             |
| spf.u_therez      | spf.ubndz+spf.uLeakagez                                                                       | m/s                                                | Intermediate variable, z component   | Boundaries 2-5, 7-11 |             |
| spf.contCoeffFace | down(spfc.contCoeff)                                                                          | kg/m <sup>3</sup>                                  | Help variable                        | Boundaries 2-5, 7-11 |             |
| spf.upwindCont    | spf.contCoeffFace*(spf.ujumpx*spf.nxmesh+spf.ujumpy*spf.nymesh+spf.ujumpz*spf.nzmesh)*test(p) | kg <sup>2</sup> /(m <sup>3</sup> .s <sup>3</sup> ) | Upwind term for continuity equation  | Boundaries 2-5, 7-11 |             |
| spf.pFace         | p                                                                                             | Pa                                                 | Pressure face value                  | Boundaries 2-5, 7-11 |             |
| spf.consFlux      | spf.pFace*(-test(spfc.u_herex))                                                               | W/m <sup>2</sup>                                   | Conservative flux                    | Boundaries 2-5, 7-11 | + operation |

| Name | Expression                                                                    | Unit | Description | Selection | Details |
|------|-------------------------------------------------------------------------------|------|-------------|-----------|---------|
|      | *spf.nxmesh-test(spf.u_herey)<br>*spf.nymesh-test(spf.u_herez)<br>*spf.nzmesh |      |             | 11        |         |

### Weak expressions

| Weak expression                                                                                                                                                                                                                                                                                                                                                                                           | Integration order | Integration frame | Selection            |
|-----------------------------------------------------------------------------------------------------------------------------------------------------------------------------------------------------------------------------------------------------------------------------------------------------------------------------------------------------------------------------------------------------------|-------------------|-------------------|----------------------|
| spf.KStressn_avx*test(spf.u_herex)+spf.KStressn_avy*test(spf.u_herey)+spf.KStressn_avz*test(spf.u_herez)+spf.KStressTestn_avx*spf.ujumpx+spf.KStressTestn_avy*spf.ujumpy+spf.KStressTestn_avz*spf.ujumpz-<br>spf.sigma_dg_ns*spf.ujumpx*test(spf.u_herex)-<br>spf.sigma_dg_ns*spf.ujumpy*test(spf.u_herey)-<br>spf.sigma_dg_ns*spf.ujumpz*test(spf.u_herez)+spf.upwind_ns+spf.upwindCont+spf.con<br>sFlux | 2                 | Spatial           | Boundaries 2-5, 7-11 |

### 2.5.6 Inlet 1

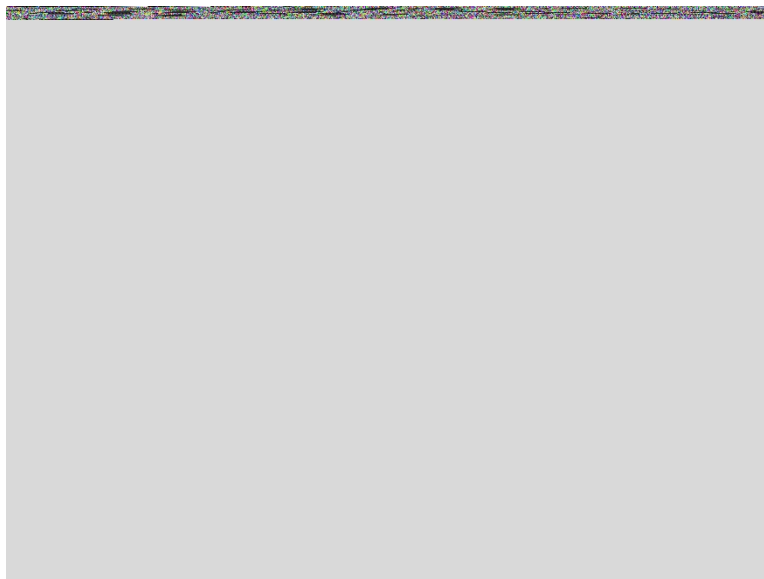

*Inlet 1*

## SELECTION

|                        |                                          |
|------------------------|------------------------------------------|
| Geometric entity level | Boundary                                 |
| Selection              | Geometry geom1: Dimension 1: Boundary 12 |

## EQUATIONS

$$\mathbf{n}^T[-p\mathbf{I} + \mathbf{K}]\mathbf{n} = -\hat{p}_0$$

$$\hat{p}_0 \geq p_0, \quad \mathbf{u} \cdot \mathbf{t} = 0$$

### Boundary condition

#### SETTINGS

| Description        | Value    |
|--------------------|----------|
| Boundary condition | Pressure |

### Pressure conditions

#### SETTINGS

| Description       | Value       |
|-------------------|-------------|
| Pressure          | 0           |
| Suppress backflow | On          |
| Flow direction    | Normal flow |

#### USED PRODUCTS

|                        |
|------------------------|
| COMSOL<br>Multiphysics |
|------------------------|

### Variables

| Name             | Expression                                                                                                             | Unit             | Description                                  | Selection      |
|------------------|------------------------------------------------------------------------------------------------------------------------|------------------|----------------------------------------------|----------------|
| spf.KStressn_avx | spf.K_stress_tenso<br>rxx*spf.nxmesh+s<br>pf.K_stress_tensor<br>xy*spf.nymesh+sp<br>f.K_stress_tensorxz<br>*spf.nzmesh | N/m <sup>2</sup> | Average<br>viscous<br>stress, x<br>component | Boundary<br>12 |
| spf.KStressn_avy | spf.K_stress_tenso<br>ryx*spf.nxmesh+s<br>pf.K_stress_tensor<br>yy*spf.nymesh+sp<br>f.K_stress_tensoryz<br>*spf.nzmesh | N/m <sup>2</sup> | Average<br>viscous<br>stress, y<br>component | Boundary<br>12 |
| spf.KStressn_avz | spf.K_stress_tenso<br>rzx*spf.nxmesh+s                                                                                 | N/m <sup>2</sup> | Average<br>viscous                           | Boundary<br>12 |



| Name                 | Expression                                                                                                        | Unit             | Description                         | Selection   |
|----------------------|-------------------------------------------------------------------------------------------------------------------|------------------|-------------------------------------|-------------|
|                      | pf.K_stress_tensorzy*spf.nymesh+spf.K_stress_tensorzz*spf.nzmesh                                                  |                  | stress, z component                 |             |
| spf.KStressTestn_avx | spf.K_stress_tensor_testxx*spf.nxmesh+spf.K_stress_tensor_testxy*spf.nymesh+spf.K_stress_tensor_testxz*spf.nzmesh | N/m <sup>2</sup> | Average viscous stress, x component | Boundary 12 |
| spf.KStressTestn_avy | spf.K_stress_tensor_testyx*spf.nxmesh+spf.K_stress_tensor_testyy*spf.nymesh+spf.K_stress_tensor_testyz*spf.nzmesh | N/m <sup>2</sup> | Average viscous stress, y component | Boundary 12 |
| spf.KStressTestn_avz | spf.K_stress_tensor_testzx*spf.nxmesh+spf.K_stress_tensor_testzy*spf.nymesh+spf.K_stress_tensor_testzz*spf.nzmesh | N/m <sup>2</sup> | Average viscous stress, z component | Boundary 12 |
| spf.ujumpx           | spf.ut_herex-spf.ut_therex                                                                                        | m/s              | Velocity jump, x component          | Boundary 12 |
| spf.ujumpy           | spf.ut_herey-spf.ut_therey                                                                                        | m/s              | Velocity jump, y component          | Boundary 12 |
| spf.ujumpz           | spf.ut_herez-spf.ut_therez                                                                                        | m/s              | Velocity jump, z component          | Boundary 12 |
| spf.meshVol          | meshvol_spatial                                                                                                   | m                |                                     | Boundary 12 |
| spf.meshVolInt       | down(meshvol_spatial)                                                                                             | m <sup>2</sup>   | Volume of interior mesh element     | Boundary 12 |
| spf.c_here           | 96/spf.epsilon_p                                                                                                  | Pa-s/m           | Intermediate variable               | Boundary 12 |
| spf.sigma_dg_ns      | 4*spf.ct_here                                                                                                     | Pa-s/m           |                                     | Boundary 12 |

| Name          | Expression                                                                                              | Unit              | Description                        | Selection   |
|---------------|---------------------------------------------------------------------------------------------------------|-------------------|------------------------------------|-------------|
| spf.rhoFace   | down(spf.rho)                                                                                           | kg/m <sup>3</sup> | Density face value                 | Boundary 12 |
| spf.umxTnFace | spf.upwind_helpx*<br>spf.nxmesh+spf.u<br>pwind_helpy*spf.n<br>ymesh+spf.upwin<br>d_helpz*spf.nzmes<br>h | m/s               | Relative velocity on face          | Boundary 12 |
| spf.upwind_ns | spf.backflowPenaltyConv*spf.uNormal                                                                     | W/m <sup>2</sup>  | Upwind term                        | Boundary 12 |
| spf.p0        | 0                                                                                                       | Pa                | Pressure                           | Boundary 12 |
| spf.f0        | spf.p0+spf.uNormal*(spf.backflowPenaltyDiff+spf.backflowPenaltyConv)*(spf.uNormal>0)                    | N/m <sup>2</sup>  | Normal stress                      | Boundary 12 |
| spf.un_here   | u*nojac(spf.nxmesh)+v*nojac(spf.ny mesh)                                                                | m/s               | Intermediate variable              | Boundary 12 |
| spf.ut_herex  | u-<br>spf.un_here*nojac(spf.nxmesh)                                                                     | m/s               | Intermediate variable, x component | Boundary 12 |
| spf.ut_herey  | v-<br>spf.un_here*nojac(spf.nymesh)                                                                     | m/s               | Intermediate variable, y component | Boundary 12 |
| spf.ut_herez  | -<br>spf.un_here*nojac(spf.nzmesh)                                                                      | m/s               | Intermediate variable, z component | Boundary 12 |
| spf.un_there  | 0                                                                                                       | m/s               | Intermediate variable              | Boundary 12 |
| spf.ut_therex | -<br>spf.un_there*nojac(spf.nxmesh)                                                                     | m/s               | Intermediate variable, x component | Boundary 12 |
| spf.ut_therey | -<br>spf.un_there*nojac(spf.nymesh)                                                                     | m/s               | Intermediate variable, y component | Boundary 12 |
| spf.ut_therez | -<br>spf.un_there*nojac(spf.nzmesh)                                                                     | m/s               | Intermediate variable, z component | Boundary 12 |
| spf.ct_here   | 24*nojac(down((spf.mu+spf.muT)/s                                                                        | Pa-s/m            | Intermediate variable              | Boundary 12 |

| Name                    | Expression                                                                                                                                                            | Unit                     | Description                                         | Selection   |
|-------------------------|-----------------------------------------------------------------------------------------------------------------------------------------------------------------------|--------------------------|-----------------------------------------------------|-------------|
|                         | $pf.\epsilon_p) * spf.meshVol / spf.meshVollnt$                                                                                                                       |                          |                                                     |             |
| spf.inl1.Te0xx          | 0                                                                                                                                                                     |                          | Viscoelastic stress tensor, xx component            | Boundary 12 |
| spf.inl1.Te0xy          | 0                                                                                                                                                                     |                          | Viscoelastic stress tensor, xy component            | Boundary 12 |
| spf.inl1.Te0xz          | 0                                                                                                                                                                     |                          | Viscoelastic stress tensor, xz component            | Boundary 12 |
| spf.inl1.Te0yy          | 0                                                                                                                                                                     |                          | Viscoelastic stress tensor, yy component            | Boundary 12 |
| spf.inl1.Te0yz          | 0                                                                                                                                                                     |                          | Viscoelastic stress tensor, yz component            | Boundary 12 |
| spf.inl1.Te0zz          | 0                                                                                                                                                                     |                          | Viscoelastic stress tensor, zz component            | Boundary 12 |
| spf.uNormal             | $u * nojac(spfxmesh) + v * nojac(spfy mesh)$                                                                                                                          | m/s                      | Normal velocity                                     | Boundary 12 |
| spf.backflowPenaltyDiff | $spf.c\_here * \min(\text{down}(spf.\mu) + spf.\mu T) * spf.meshVol / spf.meshVollnt, \text{down}(spf.\rho) * \text{abs}(spf.uNormal) / \text{down}(spf.\epsilon_p))$ | $kg^2 / (m^4 \cdot s^2)$ | Backflow penalty parameter, diffusive contribution  | Boundary 12 |
| spf.backflowPenaltyConv | $spf.\rho_{Face} * spf.u_{mxTnFace} / spf.\epsilon_p^2$                                                                                                               | $kg / (m^2 \cdot s)$     | Backflow penalty parameter, convective contribution | Boundary 12 |

## Weak expressions

| Weak expression                                                                                                                                                                                                                                                                                                                                                   | Integration order | Integration frame | Selection   |
|-------------------------------------------------------------------------------------------------------------------------------------------------------------------------------------------------------------------------------------------------------------------------------------------------------------------------------------------------------------------|-------------------|-------------------|-------------|
| -<br>spf.f0*(test(u)*spf.nxmesh+test(v)*spf.nymesh)                                                                                                                                                                                                                                                                                                               | 2                 | Spatial           | Boundary 12 |
| spf.KStressn_avx*test(spf.ut_herex)+spf.KStressn_avy*test(spf.ut_herey)+spf.KStressn_avz*test(spf.ut_herez)+spf.KStressTestn_avx*spf.ujumpx+spf.KStressTestn_avy*spf.ujumpy+spf.KStressTestn_avz*spf.ujumpz-<br>spf.sigma_dg_ns*spf.ujumpx*test(spf.ut_herex)-<br>spf.sigma_dg_ns*spf.ujumpy*test(spf.ut_herey)-<br>spf.sigma_dg_ns*spf.ujumpz*test(spf.ut_herez) | 2                 | Spatial           | Boundary 12 |

## 2.5.7 Outlet 1

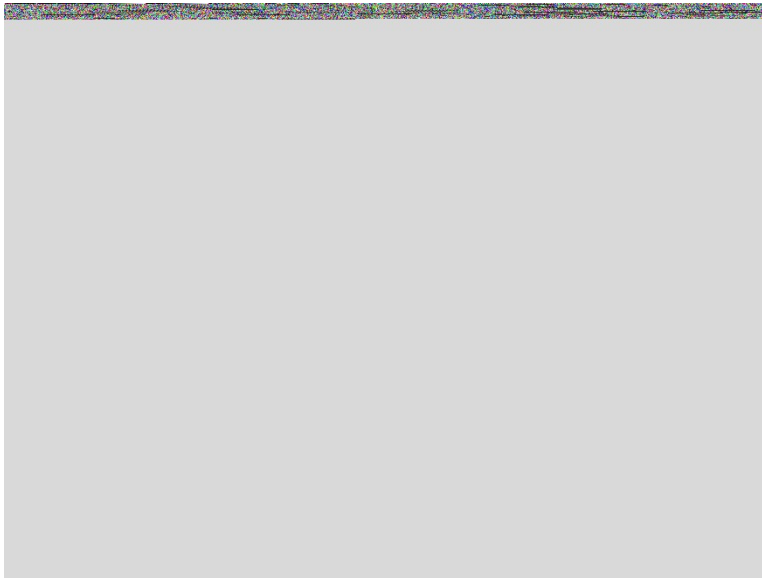

Outlet 1

### SELECTION

|                        |                                              |
|------------------------|----------------------------------------------|
| Geometric entity level | Boundary                                     |
| Selection              | Geometry geom1: Dimension 1: Boundaries 1, 6 |

### EQUATIONS

$$\mathbf{n}^T[-p\mathbf{I} + \mathbf{K}]\mathbf{n} = -p_0$$

$$\mathbf{u} \cdot \mathbf{t} = 0$$

## Boundary condition

### SETTINGS

| Description        | Value    |
|--------------------|----------|
| Boundary condition | Pressure |

## Pressure conditions

### SETTINGS

| Description       | Value |
|-------------------|-------|
| Pressure          | 0     |
| Normal flow       | On    |
| Suppress backflow | Off   |

### USED PRODUCTS

|                     |
|---------------------|
| COMSOL Multiphysics |
|---------------------|

## Variables

| Name                 | Expression                                                                                                                    | Unit             | Description                                  | Selection           |
|----------------------|-------------------------------------------------------------------------------------------------------------------------------|------------------|----------------------------------------------|---------------------|
| spf.KStressn_avx     | spf.K_stress_tensorxx*<br>spf.nxmesh+spf.K_stre<br>ss_tensorxy*spf.nymes<br>h+spf.K_stress_tensorex<br>z*spf.nzmesh           | N/m <sup>2</sup> | Average<br>viscous<br>stress, x<br>component | Boundarie<br>s 1, 6 |
| spf.KStressn_avy     | spf.K_stress_tensoryx*<br>spf.nxmesh+spf.K_stre<br>ss_tensoryy*spf.nymes<br>h+spf.K_stress_tensory<br>z*spf.nzmesh            | N/m <sup>2</sup> | Average<br>viscous<br>stress, y<br>component | Boundarie<br>s 1, 6 |
| spf.KStressn_avz     | spf.K_stress_tensorzx*<br>spf.nxmesh+spf.K_stre<br>ss_tensorzy*spf.nymes<br>h+spf.K_stress_tensorz<br>z*spf.nzmesh            | N/m <sup>2</sup> | Average<br>viscous<br>stress, z<br>component | Boundarie<br>s 1, 6 |
| spf.KStressTestn_avx | spf.K_stress_tensor_tes<br>txx*spf.nxmesh+spf.K_<br>stress_tensor_testxy*s<br>pf.nymesh+spf.K_stres<br>s_tensor_testxz*spf.nz | N/m <sup>2</sup> | Average<br>viscous<br>stress, x<br>component | Boundarie<br>s 1, 6 |

| Name                     | Expression                                                                                                                            | Unit             | Description                                  | Selection           |
|--------------------------|---------------------------------------------------------------------------------------------------------------------------------------|------------------|----------------------------------------------|---------------------|
|                          | mesh                                                                                                                                  |                  |                                              |                     |
| spf.KStressTestn_a<br>vy | spf.K_stress_tensor_tes<br>tyx*spf.nxmesh+spf.K_<br>stress_tensor_testyy*s<br>pf.nymesh+spf.K_stres<br>s_tensor_testyz*spf.nz<br>mesh | N/m <sup>2</sup> | Average<br>viscous<br>stress, y<br>component | Boundarie<br>s 1, 6 |
| spf.KStressTestn_a<br>vz | spf.K_stress_tensor_tes<br>tzx*spf.nxmesh+spf.K_<br>stress_tensor_testzy*s<br>pf.nymesh+spf.K_stres<br>s_tensor_testzz*spf.nz<br>mesh | N/m <sup>2</sup> | Average<br>viscous<br>stress, z<br>component | Boundarie<br>s 1, 6 |
| spf.ujumpx               | spf.ut_herex-<br>spf.ut_therex                                                                                                        | m/s              | Velocity<br>jump, x<br>component             | Boundarie<br>s 1, 6 |
| spf.ujumpy               | spf.ut_herey-<br>spf.ut_therey                                                                                                        | m/s              | Velocity<br>jump, y<br>component             | Boundarie<br>s 1, 6 |
| spf.ujumpz               | spf.ut_herez-<br>spf.ut_therez                                                                                                        | m/s              | Velocity<br>jump, z<br>component             | Boundarie<br>s 1, 6 |
| spf.meshVol              | meshvol_spatial                                                                                                                       | m                |                                              | Boundarie<br>s 1, 6 |
| spf.meshVolInt           | down(meshvol_spatial<br>)                                                                                                             | m <sup>2</sup>   | Volume of<br>interior<br>mesh<br>element     | Boundarie<br>s 1, 6 |
| spf.sigma_dg_ns          | 4*spf.ct_here                                                                                                                         | Pa·s/m           |                                              | Boundarie<br>s 1, 6 |
| spf.p0                   | 0                                                                                                                                     | Pa               | Pressure                                     | Boundarie<br>s 1, 6 |
| spf.f0                   | spf.p0                                                                                                                                | N/m <sup>2</sup> | Normal<br>stress                             | Boundarie<br>s 1, 6 |
| spf.un_here              | u*nojac(spf.nxmesh)+<br>v*nojac(spf.nymesh)                                                                                           | m/s              | Intermediat<br>e variable                    | Boundarie<br>s 1, 6 |
| spf.ut_herex             | u-<br>spf.un_here*nojac(spf.<br>nxmesh)                                                                                               | m/s              | Intermediat<br>e variable, x<br>component    | Boundarie<br>s 1, 6 |
| spf.ut_herey             | v-<br>spf.un_here*nojac(spf.<br>nymesh)                                                                                               | m/s              | Intermediat<br>e variable, y<br>component    | Boundarie<br>s 1, 6 |
| spf.ut_herez             | -                                                                                                                                     | m/s              | Intermediat                                  | Boundarie           |

| Name            | Expression                                                                | Unit   | Description                        | Selection       |
|-----------------|---------------------------------------------------------------------------|--------|------------------------------------|-----------------|
|                 | spf.un_here*nojac(spfnzmesh)                                              |        | e variable, z component            | s 1, 6          |
| spf.un_there    | 0                                                                         | m/s    | Intermediate variable              | Boundaries 1, 6 |
| spf.ut_there_x  | - spf.un_there*nojac(spfnxmesh)                                           | m/s    | Intermediate variable, x component | Boundaries 1, 6 |
| spf.ut_there_y  | - spf.un_there*nojac(spfnymesh)                                           | m/s    | Intermediate variable, y component | Boundaries 1, 6 |
| spf.ut_there_z  | - spf.un_there*nojac(spfnzmesh)                                           | m/s    | Intermediate variable, z component | Boundaries 1, 6 |
| spf.ct_here     | 24*nojac(down((spf.mu+spf.muT)/spf.epsilon_p))*spf.meshVol/spf.meshVollnt | Pa·s/m | Intermediate variable              | Boundaries 1, 6 |
| spf.out1.Uav    | 0                                                                         | m/s    | Average velocity                   | Global          |
| spf.out1.Uavfdf | 0                                                                         | m/s    | Average velocity                   | Global          |
| spf.out1.Mflow  | spf.out1.intFlow(spfrho*(spf.nx*u+spf.ny*v))                              | kg/s   | Mass flow                          | Global          |

### Weak expressions

| Weak expression                                                                                                                                                                                                                                                                                                                       | Integration order | Integration frame | Selection       |
|---------------------------------------------------------------------------------------------------------------------------------------------------------------------------------------------------------------------------------------------------------------------------------------------------------------------------------------|-------------------|-------------------|-----------------|
| - spf.f0*(test(u)*spf.nxmesh+test(v)*spf.nymesh)                                                                                                                                                                                                                                                                                      | 2                 | Spatial           | Boundaries 1, 6 |
| spf.KStressn_avx*test(spf.ut_herex)+spf.KStressn_avy*test(spf.ut_herey)+spf.KStressn_avz*test(spf.ut_herez)+spf.KStressTestn_avx*spf.ujumpx+spf.KStressTestn_avy*spf.ujumpy+spf.KStressTestn_avz*spf.ujumpz-spfi.sigma_dg_ns*spf.ujumpx*test(spf.ut_herex)-spfi.sigma_dg_ns*spf.ujumpy*test(spf.ut_herey)-spfi.sigma_dg_ns*spf.ujumpz | 2                 | Spatial           | Boundaries 1, 6 |

| Weak expression        | Integration order | Integration frame | Selection |
|------------------------|-------------------|-------------------|-----------|
| mpz*test(spf.ut_herez) |                   |                   |           |

## 2.5.8 Pressure Point Constraint 1

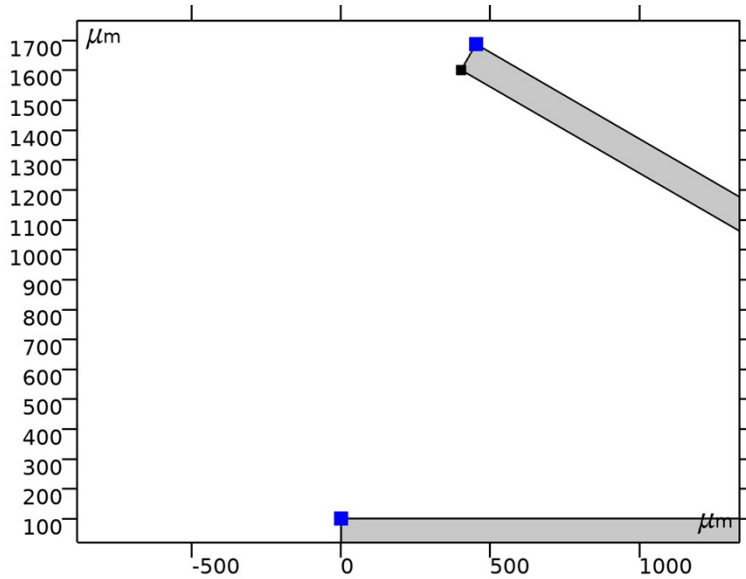

Pressure Point Constraint 1

### SELECTION

|                        |                                          |
|------------------------|------------------------------------------|
| Geometric entity level | Point                                    |
| Selection              | Geometry geom1: Dimension 0: Points 2, 6 |

### EQUATIONS

$$p = p_0$$

### Pressure constraint

#### SETTINGS

| Description | Value |
|-------------|-------|
| Pressure    | 0     |

#### USED PRODUCTS

|                        |
|------------------------|
| COMSOL<br>Multiphysics |
|------------------------|

### Variables

| Name | Expression | Unit | Description | Selection |
|------|------------|------|-------------|-----------|
|------|------------|------|-------------|-----------|



| Name   | Expression | Unit | Description | Selection   |
|--------|------------|------|-------------|-------------|
| spf.p0 | 0          | Pa   | Pressure    | Points 2, 6 |

### Constraints

| Constraint | Constraint force | Shape function    | Selection   | Details   |
|------------|------------------|-------------------|-------------|-----------|
| -p+spf.p0  | test(-p)         | Lagrange (Linear) | Points 2, 6 | Elemental |

## 2.6 MESH 1

### MESH STATISTICS

| Description             | Value  |
|-------------------------|--------|
| Minimum element quality | 0.6544 |
| Average element quality | 0.97   |
| Triangle                | 34139  |
| Quad                    | 620    |
| Edge element            | 1777   |
| Vertex element          | 12     |

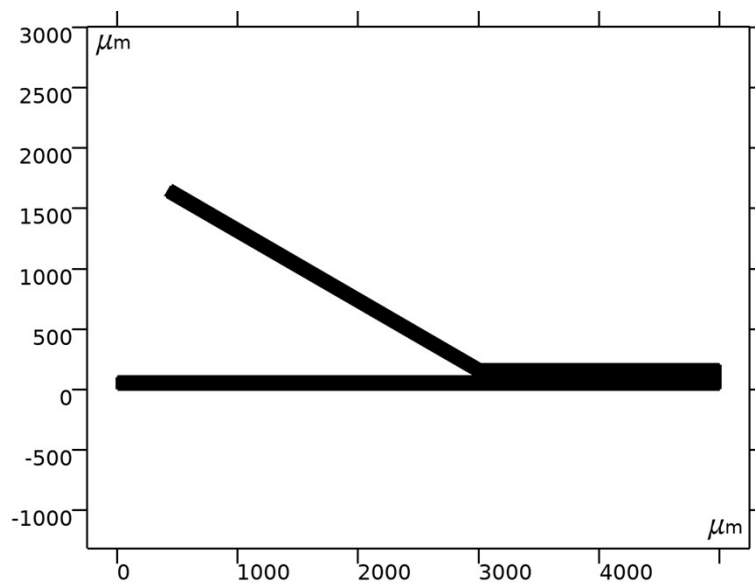

Mesh 1

### 2.6.1 Size (size)

#### SETTINGS

| Description | Value |
|-------------|-------|
|-------------|-------|

| Description                 | Value          |
|-----------------------------|----------------|
| Calibrate for               | Fluid dynamics |
| Maximum element size        | 11.3           |
| Minimum element size        | 0.0337         |
| Curvature factor            | 0.2            |
| Maximum element growth rate | 1.05           |
| Predefined size             | Extremely fine |

## 2.6.2 Size 1 (size1)

### SELECTION

|                        |                                                         |
|------------------------|---------------------------------------------------------|
| Geometric entity level | Boundary                                                |
| Selection              | Geometry geom1: Dimension 1: Boundaries 2-3, 5, 7-9, 11 |

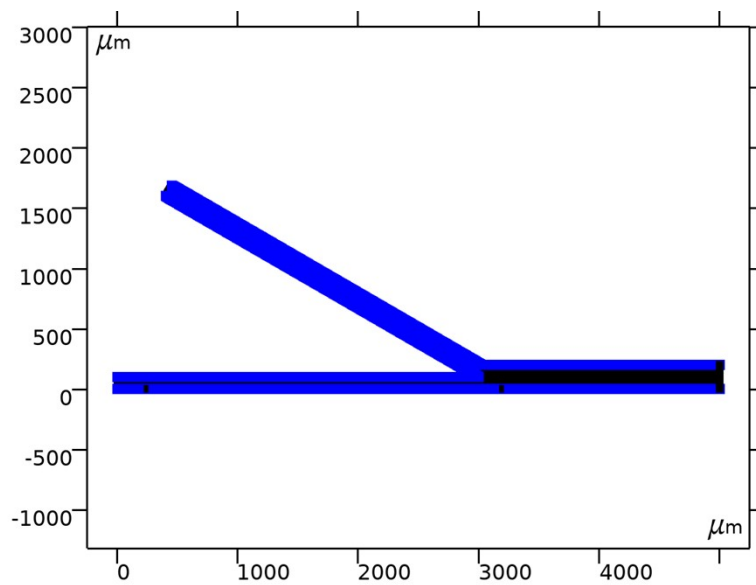

Size 1

### SETTINGS

| Description                 | Value          |
|-----------------------------|----------------|
| Calibrate for               | Fluid dynamics |
| Maximum element size        | 11.3           |
| Minimum element size        | 0.0337         |
| Curvature factor            | 0.2            |
| Maximum element growth rate | 1.05           |

| Description     | Value          |
|-----------------|----------------|
| Predefined size | Extremely fine |

### 2.6.3 Size 2 (size2)

#### SELECTION

|                        |                                                   |
|------------------------|---------------------------------------------------|
| Geometric entity level | Boundary                                          |
| Selection              | Geometry geom1: Dimension 1: Boundaries 4, 10, 12 |

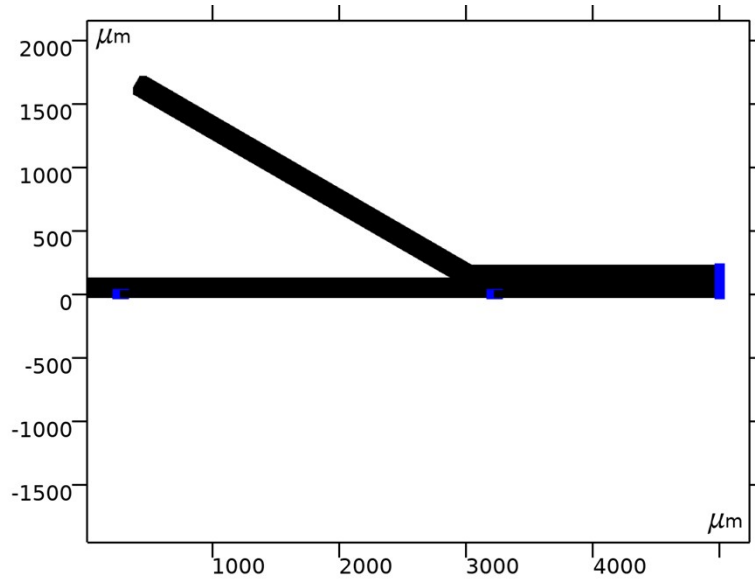

Size 2

#### SETTINGS

| Description                  | Value          |
|------------------------------|----------------|
| Calibrate for                | Fluid dynamics |
| Maximum element size         | 1.5            |
| Minimum element size         | 0.0207         |
| Curvature factor             | 0.2            |
| Curvature factor             | Off            |
| Resolution of narrow regions | Off            |
| Maximum element growth rate  | 1.05           |
| Maximum element growth rate  | Off            |
| Predefined size              | Extremely fine |
| Custom element size          | Custom         |

## 2.6.4 Corner Refinement 1 (cr1)

### SELECTION

|                        |                                          |
|------------------------|------------------------------------------|
| Geometric entity level | Domain                                   |
| Selection              | Geometry geom1: Dimension 2:<br>Domain 1 |

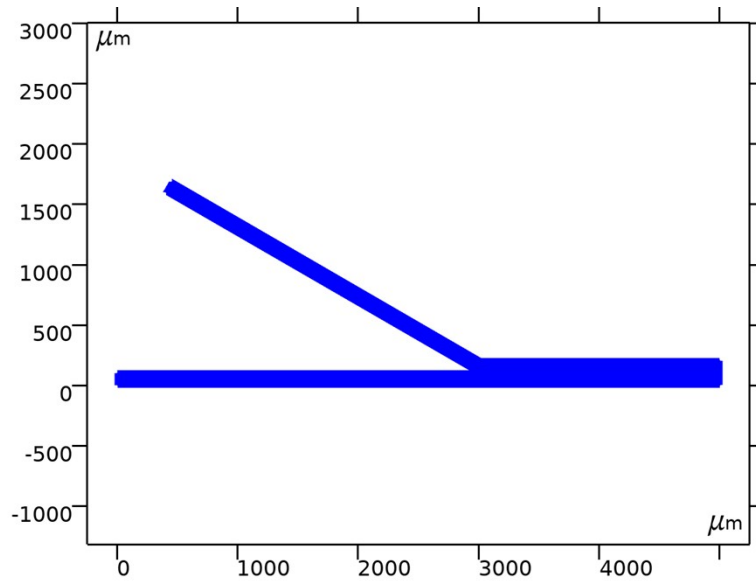

*Corner Refinement 1*

## 2.6.5 Free Triangular 1 (ftri1)

### SELECTION

|                        |               |
|------------------------|---------------|
| Geometric entity level | Domain        |
| Selection              | Remainin<br>g |

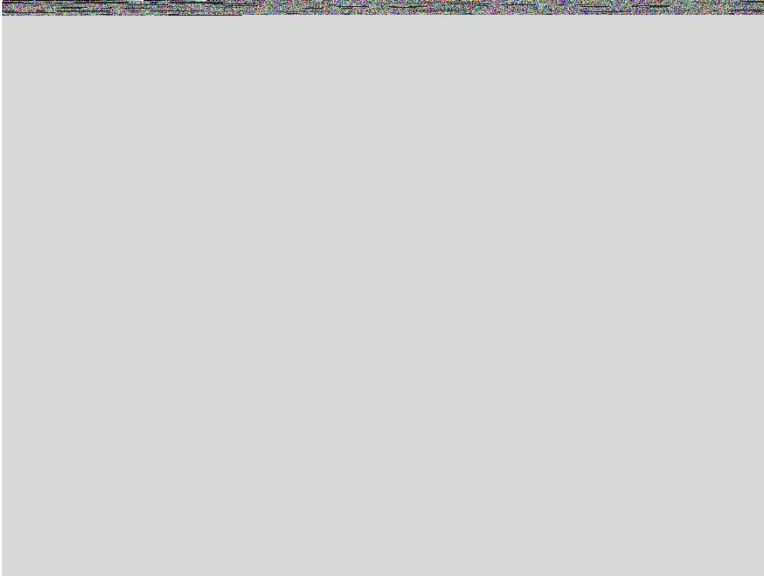

*Free Triangular 1*

## 2.6.6 Boundary Layers 1 (bl1)

### SELECTION

|                        |                                          |
|------------------------|------------------------------------------|
| Geometric entity level | Domain                                   |
| Selection              | Geometry geom1: Dimension 2:<br>Domain 1 |

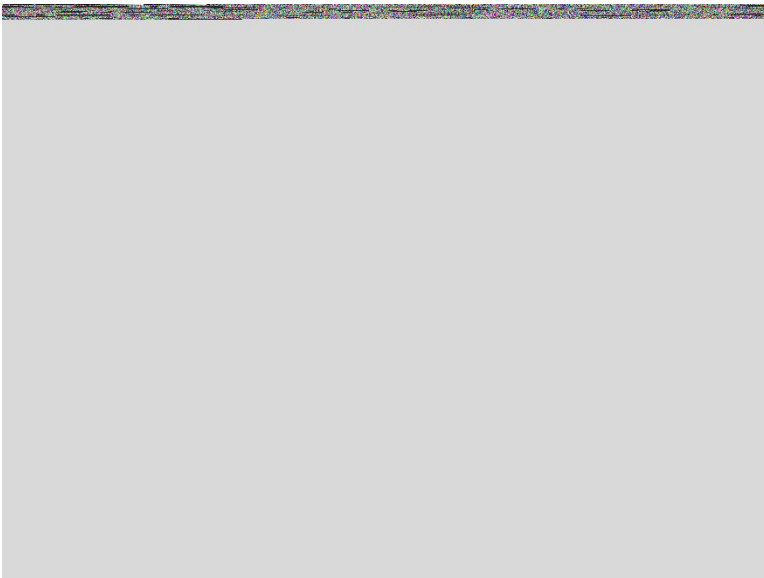

*Boundary Layers 1*

### SETTINGS

| Description | Value |
|-------------|-------|
|-------------|-------|

| Description               | Value    |
|---------------------------|----------|
| Handling of sharp corners | Trimming |

### Boundary Layer Properties 1 (blp1)

#### SELECTION

|                        |                                                       |
|------------------------|-------------------------------------------------------|
| Geometric entity level | Boundary                                              |
| Selection              | Geometry geom1: Dimension 1: Boundaries 2, 4-5, 10-11 |

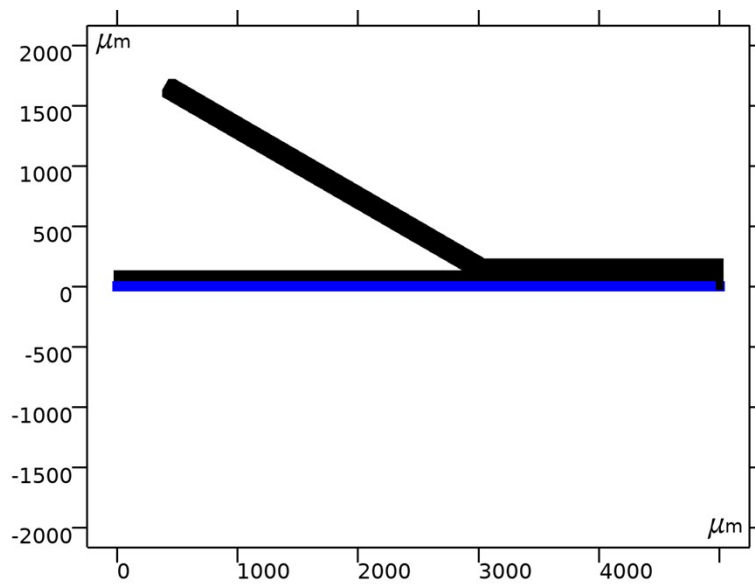

#### Boundary Layer Properties 1

#### SETTINGS

| Description                 | Value |
|-----------------------------|-------|
| Number of boundary layers   | 1     |
| Thickness adjustment factor | 10    |

### 3 Study 1

#### COMPUTATION INFORMATION

|                  |                                                |
|------------------|------------------------------------------------|
| Computation time | 1 min 2 s                                      |
| CPU              | Intel64 Family 6 Model 44 Stepping 2, 12 cores |
| Operating system | Windows 7                                      |

#### 3.1 STATIONARY

##### STUDY SETTINGS

| Description                    | Value |
|--------------------------------|-------|
| Include geometric nonlinearity | Off   |

##### PHYSICS AND VARIABLES SELECTION

| Physics interface             | Discretization |
|-------------------------------|----------------|
| Nernst-Planck Equations (npe) | physics        |
| Laminar Flow (spf)            | physics        |

##### MESH SELECTION

| Geometry           | Mesh  |
|--------------------|-------|
| Geometry 1 (geom1) | mesh1 |

#### 3.2 SOLVER CONFIGURATIONS

##### 3.2.1 Solution 1

###### Compile Equations: Stationary (st1)

##### STUDY AND STEP

| Description    | Value |
|----------------|-------|
| Use study      |       |
| Use study step |       |

##### LOG

```

<---- Compile Equations: Stationary in Study 1/Solution 1 (sol1) -----
--
Started at May 26, 2021 10:46:57 AM.
Geometry shape order: Linear
Running on Intel64 Family 6 Model 44 Stepping 2, GenuineIntel.
Using 1 socket with 12 cores in total on CNS-R-WEL870984.
Available memory: 110.59 GB.
Time: 3 s.
Physical memory: 1.96 GB
Virtual memory: 2.12 GB
Ended at May 26, 2021 10:47:01 AM.
----- Compile Equations: Stationary in Study 1/Solution 1 (sol1) -----
->

```

### Dependent Variables 1 (v1)

#### INITIAL VALUES OF VARIABLES SOLVED FOR

| Description | Value    |
|-------------|----------|
| Method      | Solution |
| Solution    |          |

#### LOG

```

<---- Dependent Variables 1 in Study 1/Solution 1 (sol1) -----
--
Started at May 26, 2021 10:47:02 AM.
Initial values of variables solved for: Solution 1 (sol1).
Solution time: 0 s.
Physical memory: 1.93 GB
Virtual memory: 2.09 GB
Ended at May 26, 2021 10:47:02 AM.
----- Dependent Variables 1 in Study 1/Solution 1 (sol1) -----
->

```

### Concentration (comp1.cBead) (comp1\_cBead)

#### GENERAL

| Description        | Value                                     |
|--------------------|-------------------------------------------|
| Field components   | comp1.cBead                               |
| Internal variables | {comp1.uflux.cBead,<br>comp1.dflux.cBead} |

### Concentration (comp1.cH3O) (comp1\_cH3O)

#### GENERAL

| Description        | Value                                   |
|--------------------|-----------------------------------------|
| Field components   | comp1.cH3O                              |
| Internal variables | {comp1.uflux.cH3O,<br>comp1.dflux.cH3O} |



### Concentration (comp1.cK) (comp1\_cK)

#### GENERAL

| Description        | Value                               |
|--------------------|-------------------------------------|
| Field components   | comp1.cK                            |
| Internal variables | {comp1.uflux.cK,<br>comp1.dflux.cK} |

### Concentration (comp1.cOH) (comp1\_cOH)

#### GENERAL

| Description        | Value                                 |
|--------------------|---------------------------------------|
| Field components   | comp1.cOH                             |
| Internal variables | {comp1.uflux.cOH,<br>comp1.dflux.cOH} |

### Pressure (comp1.p) (comp1\_p)

#### GENERAL

| Description      | Value       |
|------------------|-------------|
| Field components | comp1.<br>p |

### Velocity field (comp1.u) (comp1\_u)

#### GENERAL

| Description        | Value                          |
|--------------------|--------------------------------|
| Field components   | {comp1.u, comp1.v}             |
| Internal variables | comp1.spf.isFluidHasBeenSolved |

### Electric potential (comp1.V) (comp1\_V)

#### GENERAL

| Description        | Value                             |
|--------------------|-----------------------------------|
| Field components   | comp1.V                           |
| Internal variables | {comp1.uflux.V,<br>comp1.dflux.V} |

### Stationary Solver 1 (s1)

#### GENERAL

| Description           | Value |
|-----------------------|-------|
| Defined by study step |       |

## LOG

```
<----- Stationary Solver 1 in Study 1/Solution 1 (sol1) -----  
--  
Started at May 26, 2021 10:47:02 AM.  
Nonlinear solver  
Number of degrees of freedom solved for: 418417 (plus 17831 internal DOFs).  
Nonsymmetric matrix found.  
Scales for dependent variables:  
Concentration (compl.cBead): 8.6e+06  
Concentration (compl.cH3O): 95  
Concentration (compl.cK): 3.1e+03  
Concentration (compl.cOH): 1.5e+02  
Pressure (compl.p): 1e+02  
Velocity field (compl.u): 2.7e+02  
Electric potential (compl.V): 30  
Orthonormal null-space function used.  
Iter      SolEst      ResEst      Damping      Stepsize #Res #Jac #Sol   LinErr  
LinRes  
   1      0.00011      5.1e+03      0.0100000      0.00012    2   1    2   3.8e-  
13 5.1e-16  
   2      0.0001      4.6e+03      0.1000000      0.00011    3   2    4   1.3e-  
12 5.1e-16  
   3      4.4e-05      5.4e+02      1.0000000      0.00048    5   3    6   1.6e-  
11 4.4e-16  
Solution time: 57 s.  
Physical memory: 5.31 GB  
Virtual memory: 6.03 GB  
Ended at May 26, 2021 10:47:59 AM.  
----- Stationary Solver 1 in Study 1/Solution 1 (sol1) -----  
->
```

### Advanced (aDef)

#### ASSEMBLY SETTINGS

| Description            | Value |
|------------------------|-------|
| Reuse sparsity pattern | On    |

### Fully Coupled 1 (fc1)

#### GENERAL

| Description   | Value |
|---------------|-------|
| Linear solver |       |

#### METHOD AND TERMINATION

| Description                  | Value  |
|------------------------------|--------|
| Initial damping factor       | 0.01   |
| Minimum damping factor       | 1.0E-6 |
| Maximum number of iterations | 100    |

**Direct 1 (d1)**

GENERAL

| <b>Description</b>    | <b>Value</b> |
|-----------------------|--------------|
| Solver                | PARDIS<br>O  |
| Pivoting perturbation | 1.0E-13      |

## 4 Results

### 4.1 DATA SETS

#### 4.1.1 Study 1/Solution 1

##### SOLUTION

| Description | Value                    |
|-------------|--------------------------|
| Solution    |                          |
| Component   | Save Point Geometry<br>1 |

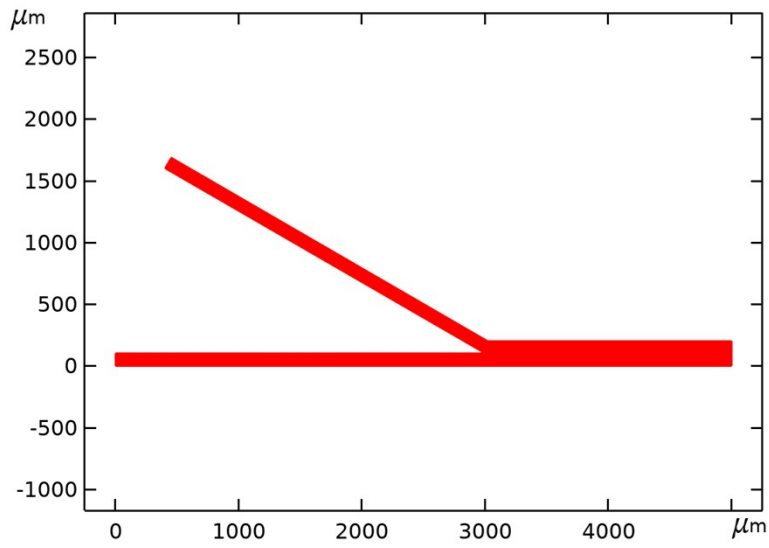

Dataset: Study 1/Solution 1

## 4.2 PLOT GROUPS

### 4.2.1 Concentration, H3O (npe)

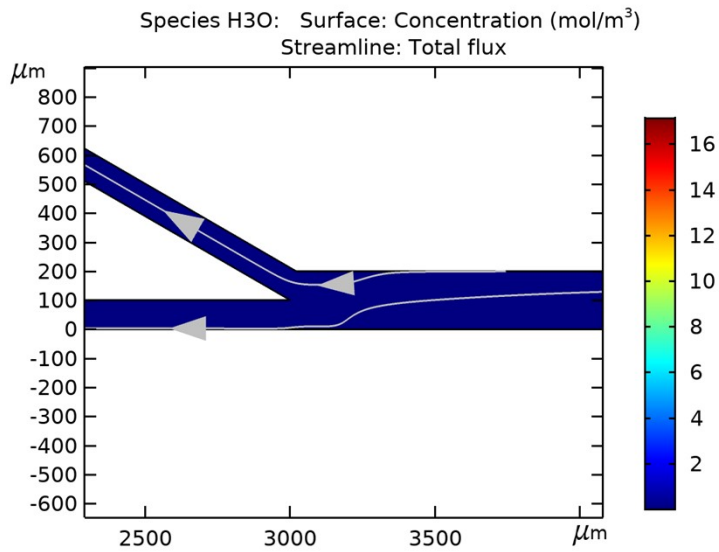

*Species H3O: Surface: Concentration (mol/m<sup>3</sup>) Streamline: Total flux*

### 4.2.2 Concentration, OH (npe)

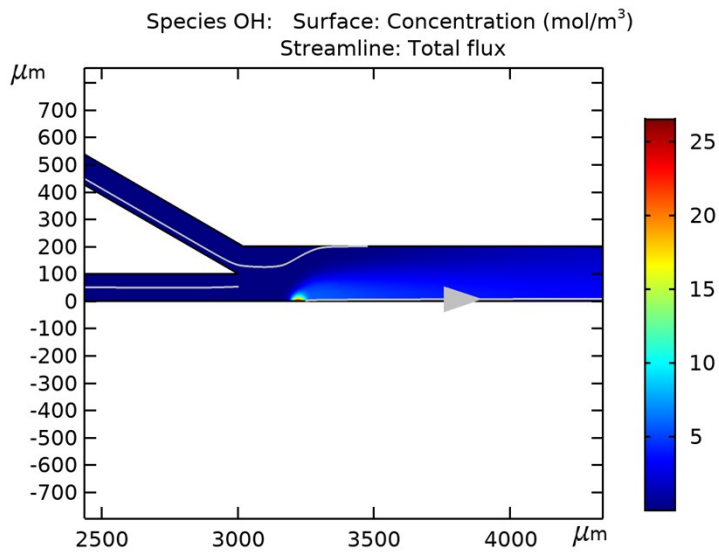

*Species OH: Surface: Concentration (mol/m<sup>3</sup>) Streamline: Total flux*

### 4.2.3 Concentration, bead (npe)

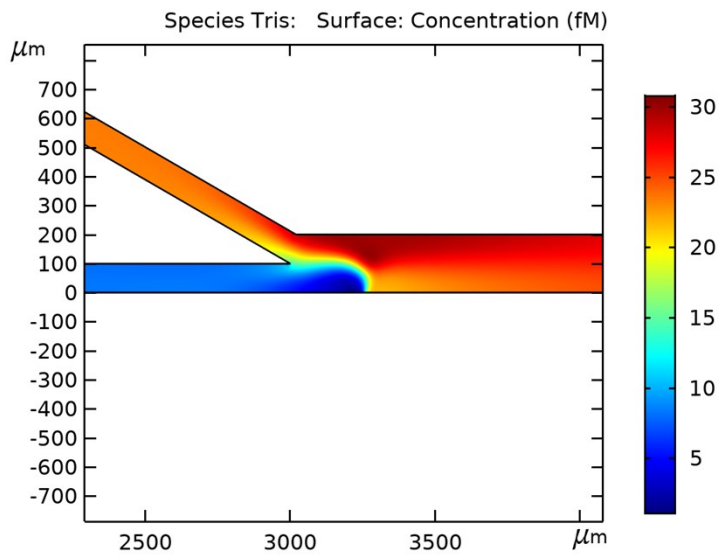

*Species Tris: Surface: Concentration (fM)*

### 4.2.4 Concentration, K (npe)

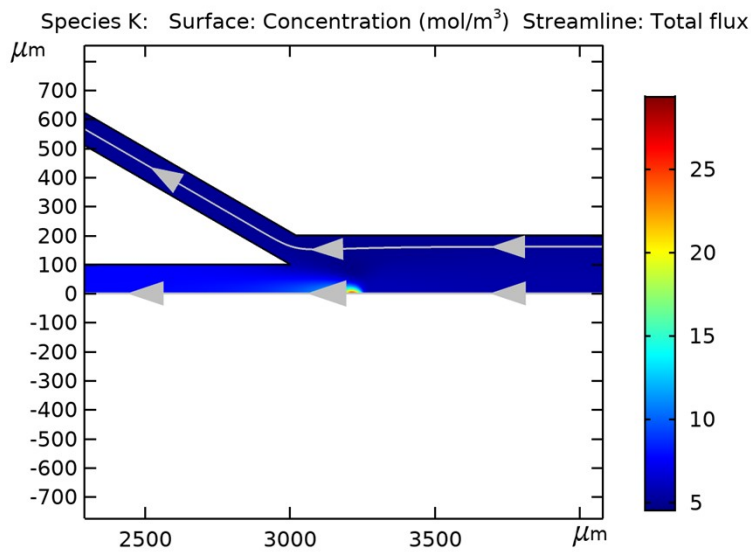

*Species K: Surface: Concentration (mol/m<sup>3</sup>) Streamline: Total flux*

### 4.2.5 Concentration, Cl (npe)

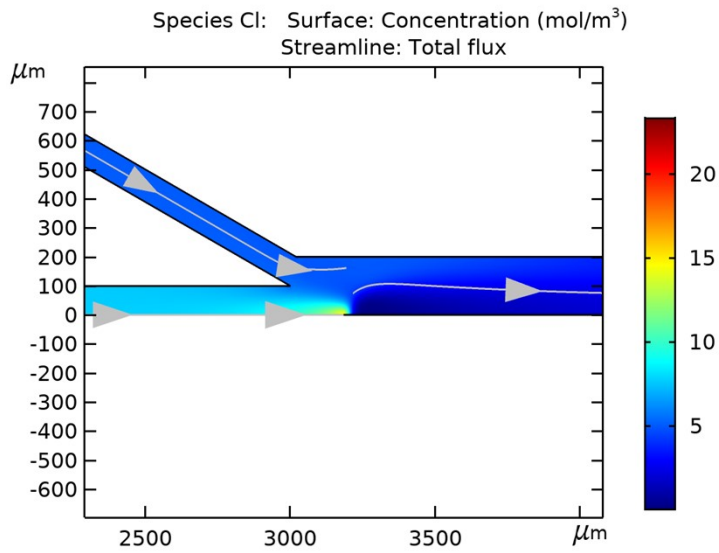

*Species Cl: Surface: Concentration (mol/m<sup>3</sup>) Streamline: Total flux*

### 4.2.6 Electric field (npe)

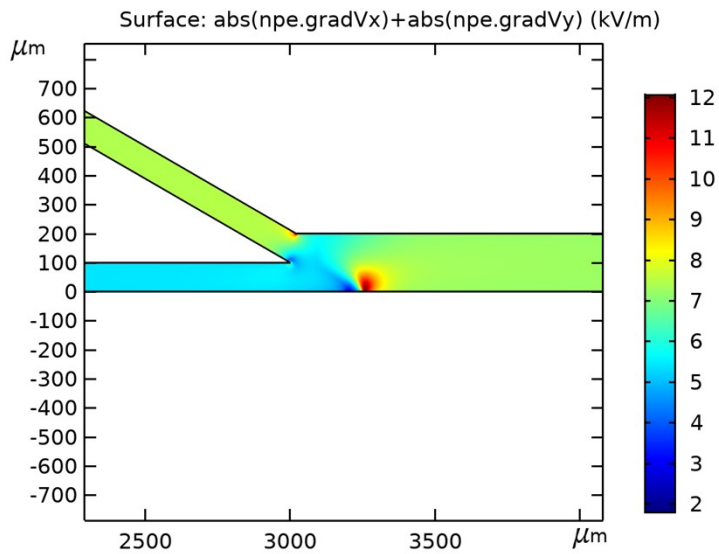

*Surface:  $\text{abs}(\text{npe.gradVx}) + \text{abs}(\text{npe.gradVy})$  (kV/m)*

### 4.2.7 Velocity (spf)

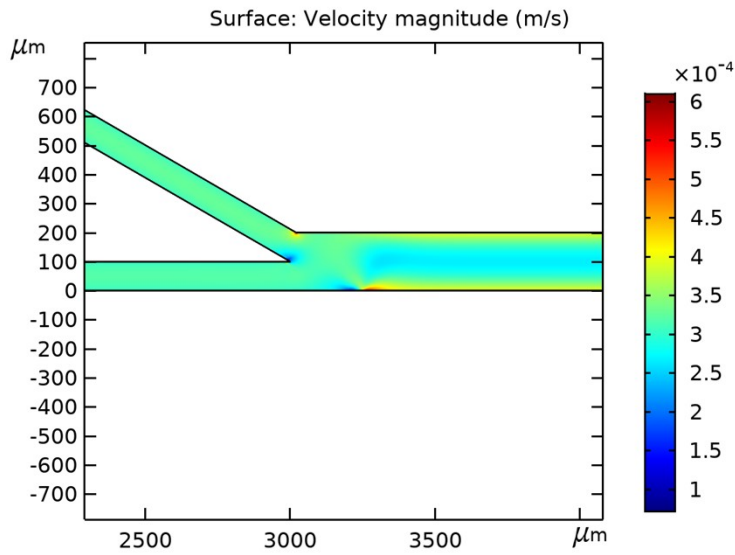

Surface: Velocity magnitude (m/s)

### 4.2.8 Pressure (spf)

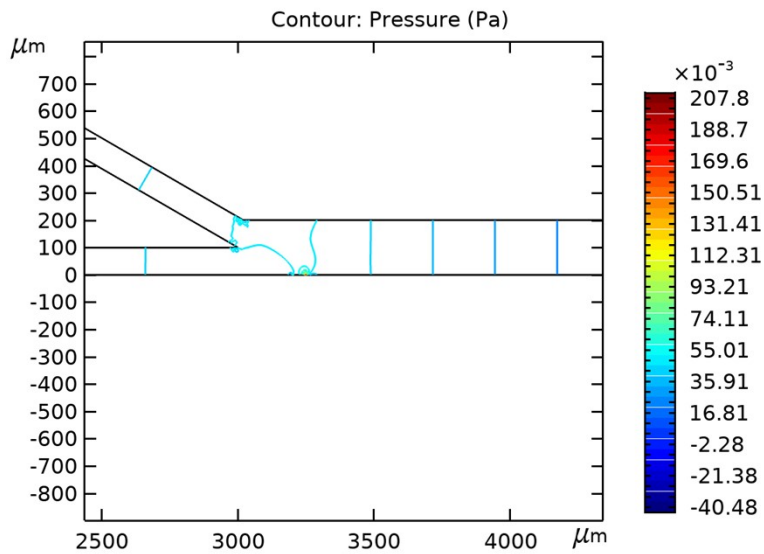

Contour: Pressure (Pa)
