# Supplementary material for: Filtering and continuously separating microplastics from water using electric field gradients formed electrochemically in the absence of buffer
Source: Royal Society of Chemistry journal article supplement (doi:10.1039/d1sc03192a), 2021-01-01
Supplement: d1sc03192a2.pdf [file d1sc03192a2.pdf]

## Filtration simulations-052621

|             |                          |
|-------------|--------------------------|
| Report date | May 26, 2021 11:14:07 AM |
|-------------|--------------------------|

# Contents

- 1. Global Definitions .....**
- 1.1. Parameters .....
- 2. Component 1 .....**
- 2.1. Definitions .....
- 2.2. Geometry 1 .....
- 2.3. Materials.....
- 2.4. Laminar Flow .....
- 2.5. Electrostatics.....
- 2.6. Transport of Diluted Species.....
- 2.7. Mesh 1 .....
- 3. Study 1 .....**
- 3.1. Stationary.....
- 3.2. Solver Configurations .....
- 4. Results .....**
- 4.1. Datasets.....
- 4.2. Plot Groups .....

# 1 Global Definitions

|      |                          |
|------|--------------------------|
| Date | May 26, 2021 10:57:21 AM |
|------|--------------------------|

## GLOBAL SETTINGS

|             |                                                                                          |
|-------------|------------------------------------------------------------------------------------------|
| Name        | Filtration simulations-052621.mph                                                        |
| Path        | C:\Users\jrt3552\Documents\BED\final final simulations\Filtration simulations-052621.mph |
| Version     | COMSOL Multiphysics 5.5 (Build: 359)                                                     |
| Unit system | SI                                                                                       |

## USED PRODUCTS

|                                      |
|--------------------------------------|
| COMSOL Multiphysics                  |
| Chemical Reaction Engineering Module |

## 1.1 PARAMETERS

### PARAMETERS 1

| Name   | Expression                  | Value                      | Description                            |
|--------|-----------------------------|----------------------------|----------------------------------------|
| cK0    | 1[mM]                       | 1 mol/<br>m <sup>3</sup>   | initial concentration of K             |
| cCl0   | 1[mM]                       | 1 mol/<br>m <sup>3</sup>   | initial concentration of Cl            |
| cH3O0  | 1e-7[M]                     | 1E-4 mol/m <sup>3</sup>    | initial concentration of H3O           |
| cOH0   | 1e-7[M]                     | 1E-4 mol/m <sup>3</sup>    | initial concentration of OH            |
| cBEAD0 | 30[fM]                      | 3E-11 mol/m <sup>3</sup>   | initial concentration of microplastics |
| dK     | 1.97e-9[m <sup>2</sup> /s]  | 1.97E-9 m <sup>2</sup> /s  | diffusivity of K                       |
| dCl    | 2.033e-9[m <sup>2</sup> /s] | 2.033E-9 m <sup>2</sup> /s | diffusivity of Cl                      |
| dH3O   | 9.103E-9[m <sup>2</sup> /s] | 9.103E-9 m <sup>2</sup> /s | diffusivity of H3O                     |
| dOH    | 5.286E-9[m <sup>2</sup> /s] | 5.286E-                    | diffusivity of                         |

| Name     | Expression                        | Value                             | Description                                 |
|----------|-----------------------------------|-----------------------------------|---------------------------------------------|
|          |                                   | 9 m <sup>2</sup> /s               | OH                                          |
| dBEAD    | 6.16e-10[m <sup>2</sup> /s]       | 6.16E-10 m <sup>2</sup> /s        | diffusivity of microplastics                |
| i_elec   | 440[nA]                           | 4.4E-7 A                          | steady-state current through the BPE        |
| j_elec   | i_elec/(100*50[um <sup>2</sup> ]) | 88 A/m <sup>2</sup>               | current density at the BPE                  |
| f_elec   | j_elec/F_const                    | 9.1206E-4 mol/(m <sup>2</sup> .s) | flux through the BPE                        |
| k_fhydro | 2e-5[1/s]                         | 2E-5 1/s                          | forward rate constant for water hydrolysis  |
| k_bhydro | 1.4e11[1/(M*s)]                   | 1.4E8 m <sup>3</sup> /(s.mol)     | backward rate constant for water hydrolysis |
| cH2O0    | 55.5[M]                           | 55500 mol/m <sup>3</sup>          | concentration of water                      |

## 2 Component 1

|      |                         |
|------|-------------------------|
| Date | Jul 28, 2020 6:09:07 PM |
|------|-------------------------|

### SETTINGS

| Description          | Value                 |
|----------------------|-----------------------|
| Unit system          | Same as global system |
| Geometry shape order | Automatic             |

### SPATIAL FRAME COORDINATES

| First | Second | Third |
|-------|--------|-------|
| x     | y      | z     |

### MATERIAL FRAME COORDINATES

| First | Second | Third |
|-------|--------|-------|
| X     | Y      | Z     |

### GEOMETRY FRAME COORDINATES

| First | Second | Third |
|-------|--------|-------|
| Xg    | Yg     | Zg    |

### MESH FRAME COORDINATES

| First | Second | Third |
|-------|--------|-------|
| Xm    | Ym     | Zm    |

## 2.1 DEFINITIONS

### 2.1.1 Coordinate Systems

#### Boundary System 1

|                        |                 |
|------------------------|-----------------|
| Coordinate system type | Boundary system |
| Tag                    | sys1            |

### COORDINATE NAMES

| First | Second | Third |
|-------|--------|-------|
|-------|--------|-------|

| First | Second | Third |
|-------|--------|-------|
| t1    | n      | to    |

## 2.2 GEOMETRY 1

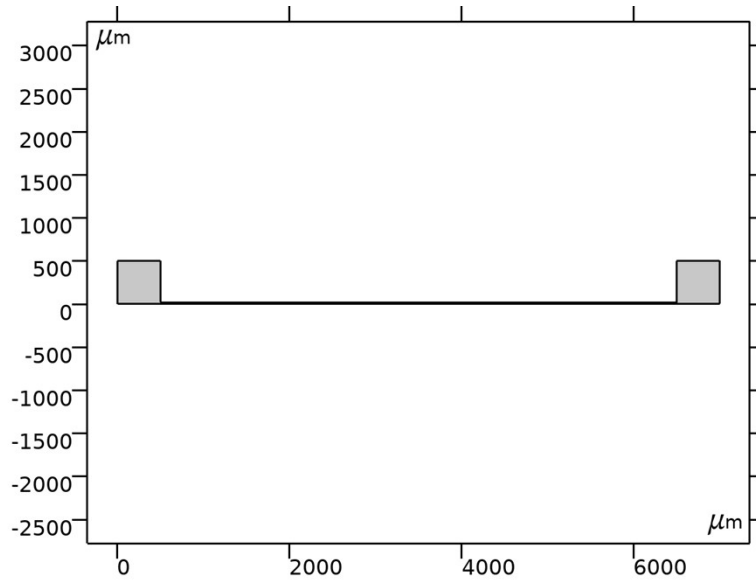

Geometry 1

### UNITS

|              |               |
|--------------|---------------|
| Length unit  | $\mu\text{m}$ |
| Angular unit | deg           |

### GEOMETRY STATISTICS

| Description          | Value |
|----------------------|-------|
| Space dimension      | 2     |
| Number of domains    | 1     |
| Number of boundaries | 12    |
| Number of vertices   | 12    |

### 2.2.1 Polygon 1 (pol1)

#### OBJECT TYPE

| Description | Value |
|-------------|-------|
| Type        | Solid |

#### COORDINATES

| <b>Description</b> | <b>Value</b> |
|--------------------|--------------|
| Data source        | Table        |

#### COORDINATES

| <b>x (μm)</b> | <b>y (μm)</b> |
|---------------|---------------|
| 0             | 0             |
| 0             | 500           |
| 500           | 500           |
| 500           | 15            |
| 6500          | 15            |
| 6500          | 500           |
| 7000          | 500           |
| 7000          | 0             |
| 0             | 0             |

#### 2.2.2 Point 1 (pt1)

##### POINT

| <b>Description</b> | <b>Value</b> |
|--------------------|--------------|
| Point coordinate   | {2000, 0}    |

#### 2.2.3 Point 2 (pt2)

##### POINT

| <b>Description</b> | <b>Value</b> |
|--------------------|--------------|
| Point coordinate   | {2050, 0}    |

#### 2.2.4 Point 3 (pt3)

##### POINT

| <b>Description</b> | <b>Value</b> |
|--------------------|--------------|
| Point coordinate   | {4950, 0}    |

#### 2.2.5 Point 4 (pt4)

##### POINT

| <b>Description</b> | <b>Value</b> |
|--------------------|--------------|
| Point coordinate   | {5000, 0}    |

## 2.3 MATERIALS

### 2.3.1 Water, liquid

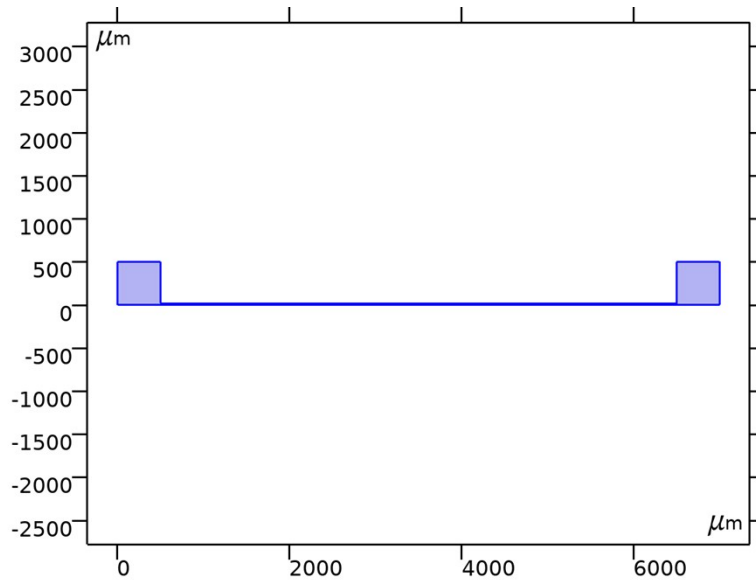

*Water, liquid*

#### SELECTION

|                        |                                          |
|------------------------|------------------------------------------|
| Geometric entity level | Domain                                   |
| Selection              | Geometry geom1: Dimension 2: All domains |

#### MATERIAL PARAMETERS

| Name                  | Value  | Unit              |
|-----------------------|--------|-------------------|
| Dynamic viscosity     | eta(T) | Pa·s              |
| Density               | rho(T) | kg/m <sup>3</sup> |
| Relative permittivity | 80     | 1                 |

#### BASIC SETTINGS

| Description                          | Value                                                        |
|--------------------------------------|--------------------------------------------------------------|
| Coefficient of thermal expansion     | {{alpha_p(T), 0, 0}, {0, alpha_p(T), 0}, {0, 0, alpha_p(T)}} |
| Bulk viscosity                       | muB(T)                                                       |
| thermalexpansioncoefficient_symmetry | 3                                                            |
| bulkviscosity_symmetry               | 0                                                            |
| Dynamic viscosity                    | eta(T)                                                       |
| dynamicviscosity_symmetry            | 0                                                            |
| Ratio of specific heats              | gamma_w(T)                                                   |



| Description                        | Value                                                           |
|------------------------------------|-----------------------------------------------------------------|
| ratioofspecificeat_symmetry        | 0                                                               |
| Electrical conductivity            | {{5.5e-6[S/m], 0, 0}, {0, 5.5e-6[S/m], 0}, {0, 0, 5.5e-6[S/m]}} |
| electricconductivity_symmetry      | 3                                                               |
| Heat capacity at constant pressure | Cp(T)                                                           |
| heatcapacity_symmetry              | 0                                                               |
| Density                            | rho(T)                                                          |
| density_symmetry                   | 0                                                               |
| Thermal conductivity               | {{k(T), 0, 0}, {0, k(T), 0}, {0, 0, k(T)}}                      |
| thermalconductivity_symmetry       | 3                                                               |
| Speed of sound                     | cs(T)                                                           |
| soundspeed_symmetry                | 0                                                               |
| Relative permittivity              | {{80, 0, 0}, {0, 80, 0}, {0, 0, 80}}                            |
| relpermittivity_symmetry           | 0                                                               |

## FUNCTIONS

| Function name | Type          |
|---------------|---------------|
| eta           | Piecewise     |
| Cp            | Piecewise     |
| rho           | Piecewise     |
| k             | Piecewise     |
| cs            | Interpolation |
| alpha_p       | Analytic      |
| gamma_w       | Analytic      |
| muB           | Analytic      |

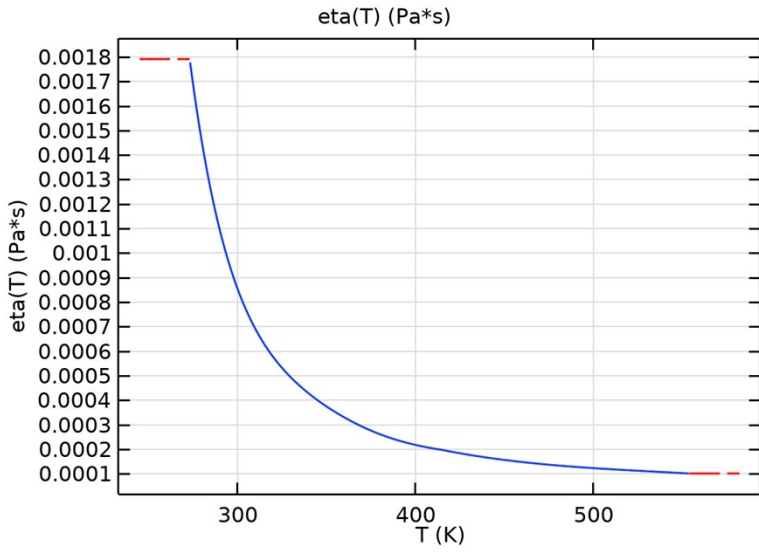

*eta*

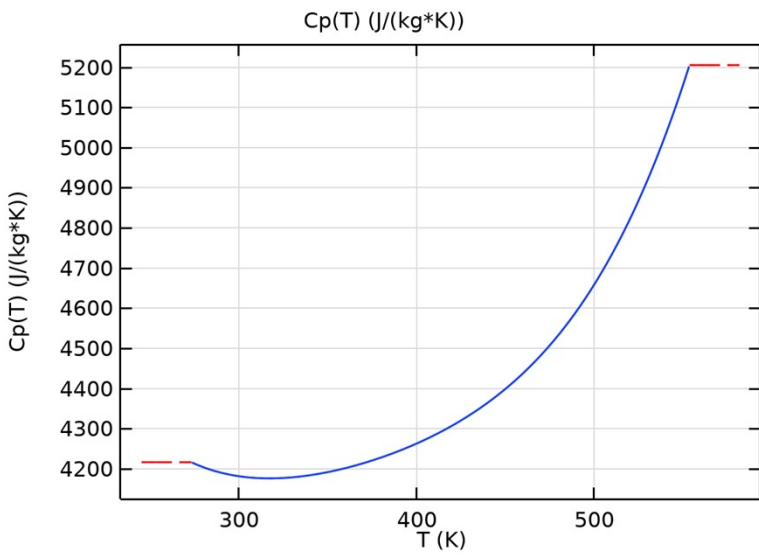

*Cp*

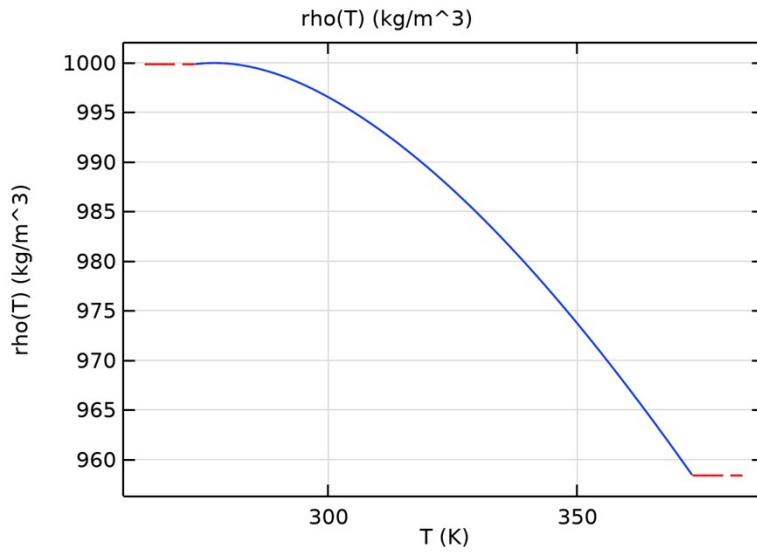

rho

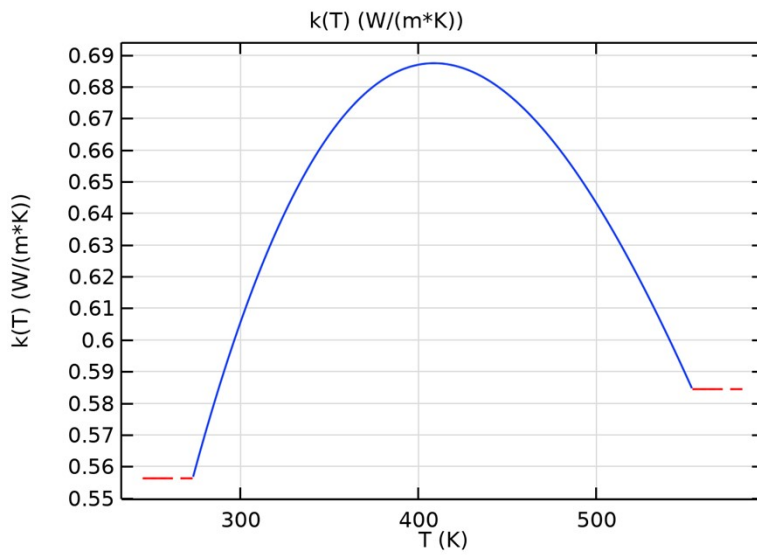

k

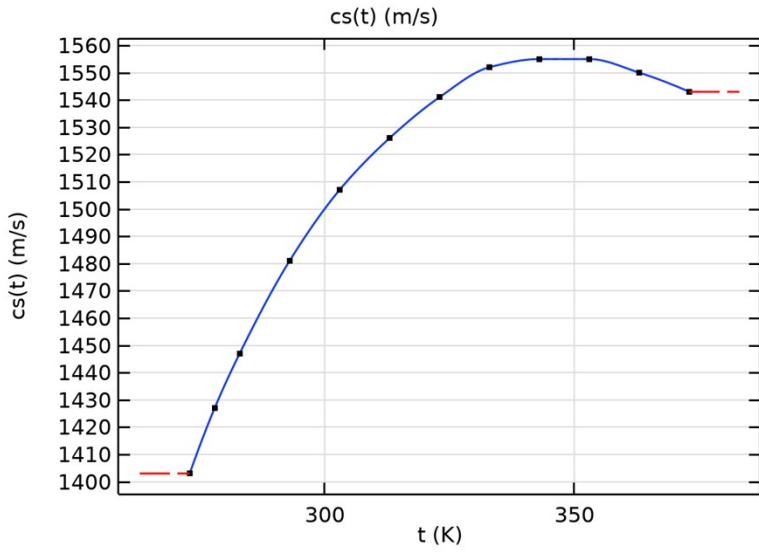

cs

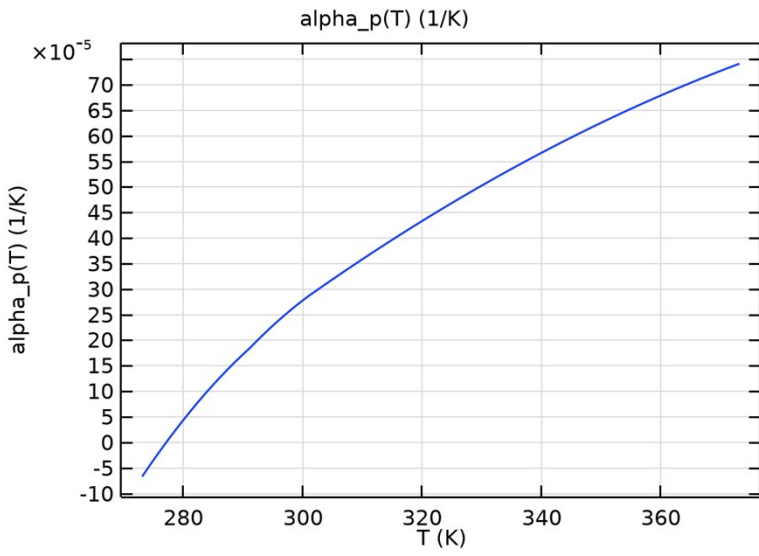

alpha\_p

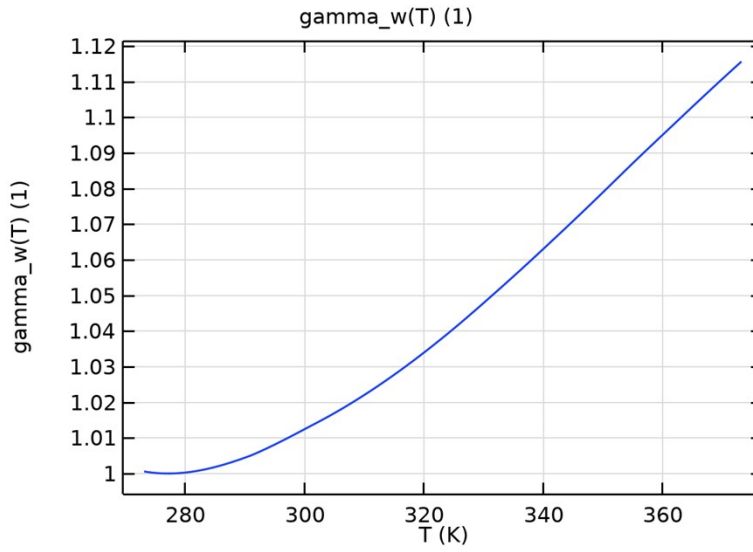

*gamma\_w*

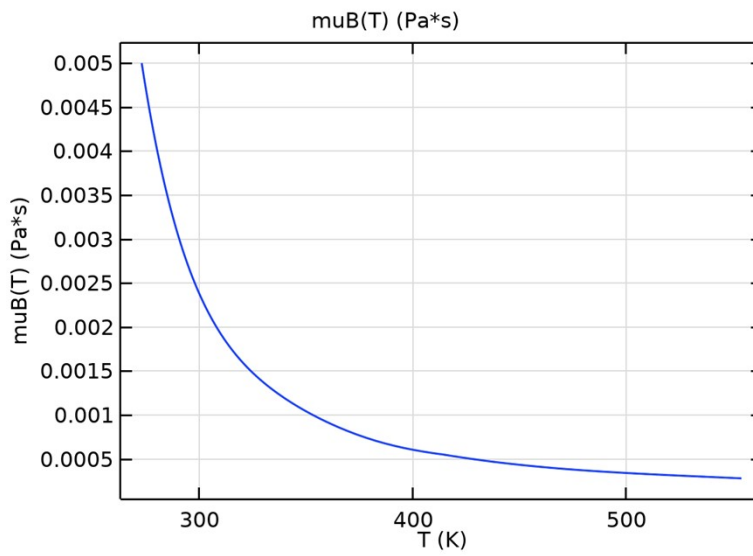

*muB*

## 2.4 LAMINAR FLOW

### USED PRODUCTS

COMSOL Multiphysics

Chemical Reaction Engineering  
Module

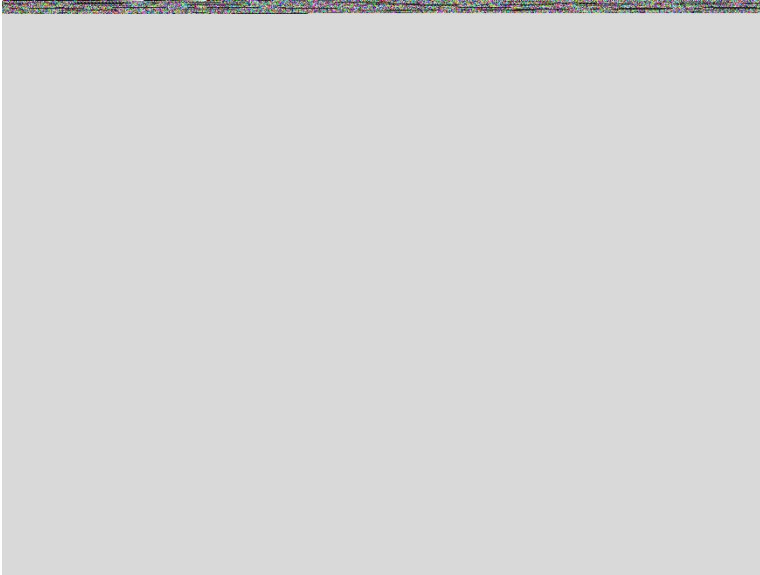

### Laminar Flow

#### SELECTION

|                        |                                          |
|------------------------|------------------------------------------|
| Geometric entity level | Domain                                   |
| Selection              | Geometry geom1: Dimension 2: All domains |

#### EQUATIONS

$$\rho(\mathbf{u} \cdot \nabla)\mathbf{u} = \nabla \cdot [-p\mathbf{I} + \mathbf{K}] + \mathbf{F}$$
$$\rho \nabla \cdot \mathbf{u} = 0$$

## 2.4.1 Interface settings

### Discretization

#### SETTINGS

| Description              | Value   |
|--------------------------|---------|
| Discretization of fluids | P2 + P1 |

### Physical model

#### SETTINGS

| Description                         | Value               |
|-------------------------------------|---------------------|
| Neglect inertial term (Stokes flow) | Off                 |
| Compressibility                     | Incompressible flow |
| Enable porous media domains         | Off                 |
| Reference temperature               | User defined        |
| Reference temperature               | 293.15[K]           |

| Description              | Value  |
|--------------------------|--------|
| Reference pressure level | 1[atm] |

## Turbulence

### SETTINGS

| Description           | Value |
|-----------------------|-------|
| Turbulence model type | None  |

## 2.4.2 Variables

| Name                      | Expression                                                                                                                                                                                           | Unit | Description              | Selection       | Details     |
|---------------------------|------------------------------------------------------------------------------------------------------------------------------------------------------------------------------------------------------|------|--------------------------|-----------------|-------------|
| spf.Tref                  | model.input.Tref                                                                                                                                                                                     | K    | Reference temperature    | Global          | Meta        |
| spf.dz                    | 1                                                                                                                                                                                                    | m    | Thickness                | Domain 1        |             |
| spf.pref                  | 1[atm]                                                                                                                                                                                               | Pa   | Reference pressure level | Domain 1        |             |
| spf.pA                    | p+spf.pref                                                                                                                                                                                           | Pa   | Absolute pressure        | Domain 1        |             |
| spf.hasWF                 | 0                                                                                                                                                                                                    |      | Help variable            | Boundaries 1–12 |             |
| spf.dt_CFL                | $1/\max(\text{spf.maxOp}(\sqrt{\text{emetric\_spatial}(u-d(x,\text{TIME}),v-d(y,\text{TIME})))},\text{eps}))$                                                                                        | s    | Time step, CFL=1         | Global          |             |
| spf.usePseudoTimeStepping | 0                                                                                                                                                                                                    | 1    | Help variable            | Global          | + operation |
| spf.localCFLvalue         | $1.3^{\min(\text{niterCMP},9)} + \text{if}(\text{niterCMP} \geq 25, 9 * 1.3^{\min(-25 + \text{niterCMP}, 9)}, 0) + \text{if}(\text{niterCMP} \geq 45, 90 * 1.3^{\min(-45 + \text{niterCMP}, 9)}, 0)$ |      | Local CFL number         | Domain 1        |             |
| spf.locCFL                | CFLCMP                                                                                                                                                                                               | 1    | Local CFL number         | Domain 1        |             |
| spf.geometryL             | 1.25E-4                                                                                                                                                                                              | m    | Geometry                 | Domain 1        |             |

| Name              | Expression                                                                                                                                                    | Unit | Description                | Selection       | Details |
|-------------------|---------------------------------------------------------------------------------------------------------------------------------------------------------------|------|----------------------------|-----------------|---------|
| engthScale        |                                                                                                                                                               |      | length scale               |                 |         |
| spf.time_step_inv | $\max(\sqrt{\text{emetric\_spatial}(u,v)^2}^{\text{if}(\text{gmg\_level} < 2, 0, -1 + \text{gmg\_level})^2}, \text{spf.nu}/\text{spf.geometryLengthScale}^2)$ | Hz   | Inverse time step          | Domain 1        |         |
| spf.tsti          | $\text{nojac}(\text{spf.time\_step\_inv}/\text{spf.locCFL})$                                                                                                  | 1/s  | Help variable              | Domain 1        |         |
| spf.nx            | dnx                                                                                                                                                           | 1    | Normal vector, x component | Boundaries 1–12 |         |
| spf.ny            | dny                                                                                                                                                           | 1    | Normal vector, y component | Boundaries 1–12 |         |
| spf.nz            | 0                                                                                                                                                             | 1    | Normal vector, z component | Boundaries 1–12 |         |
| spf.nxmesh        | dnxmesh                                                                                                                                                       | 1    | Normal vector, x component | Boundaries 1–12 |         |
| spf.nymesh        | dnymesh                                                                                                                                                       | 1    | Normal vector, y component | Boundaries 1–12 |         |
| spf.nzmesh        | 0                                                                                                                                                             | 1    | Normal vector, z component | Boundaries 1–12 |         |



## 2.4.3 Fluid Properties 1

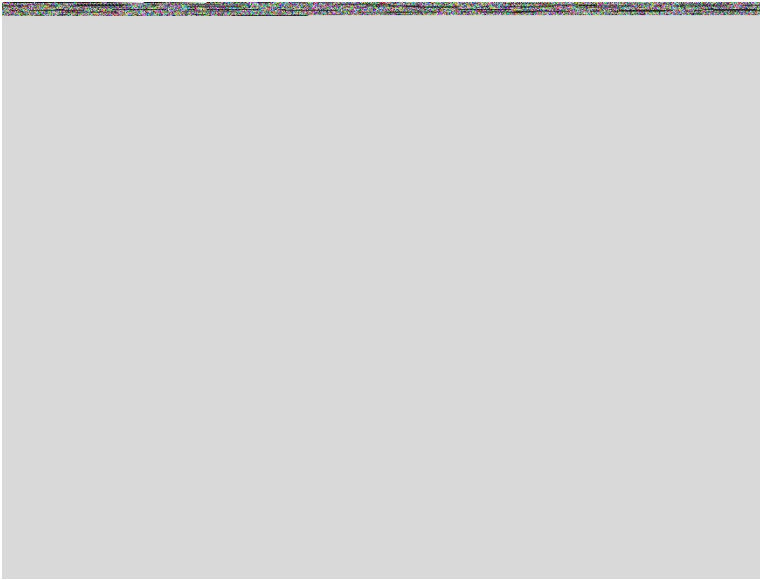

*Fluid Properties 1*

### SELECTION

|                        |                                          |
|------------------------|------------------------------------------|
| Geometric entity level | Domain                                   |
| Selection              | Geometry geom1: Dimension 2: All domains |

### EQUATIONS

$$\rho(\mathbf{u} \cdot \nabla)\mathbf{u} = \nabla \cdot [-p\mathbf{I} + \mathbf{K}] + \mathbf{F}$$

$$\rho \nabla \cdot \mathbf{u} = 0$$

$$\mathbf{K} = \mu(\nabla \mathbf{u} + (\nabla \mathbf{u})^T)$$

### Fluid properties

#### SETTINGS

| Description       | Value         |
|-------------------|---------------|
| Density           | From material |
|                   | Newtonian     |
| Dynamic viscosity | From material |

### Model input

#### SETTINGS

| Description | Value              |
|-------------|--------------------|
| Temperature | Common model input |

## USED PRODUCTS

COMSOL  
Multiphysics

## PROPERTIES FROM MATERIAL

| Property          | Material      | Property group |
|-------------------|---------------|----------------|
| Density           | Water, liquid | Basic          |
| Dynamic viscosity | Water, liquid | Basic          |

## Variables

| Name       | Expression                                                                                   | Unit              | Description                            | Selection | Details |
|------------|----------------------------------------------------------------------------------------------|-------------------|----------------------------------------|-----------|---------|
| spf.mu     | material.mu                                                                                  | Pa·s              | Dynamic viscosity                      | Domain 1  | Meta    |
| spf.rho    | subst(material.rho,spf.fp1.mininput_temperature,spf.Trho,spf.fp1.mininput_pressure,spf.prho) | kg/m <sup>3</sup> | Density                                | Domain 1  | Meta    |
| spf.Trho   | spf.Tref                                                                                     | K                 | Temperature for density evaluation     | Domain 1  |         |
| spf.prho   | spf.pref                                                                                     | Pa                | Pressure for the evaluation of density | Domain 1  |         |
| spf.rhoref | subst(material.rho,spf.fp1.mininput_temperature,spf.Tref,spf.fp1.mininput_pressure,spf.pref) | kg/m <sup>3</sup> | Reference density                      | Domain 1  | Meta    |
| spf.mumat  | material.mu                                                                                  | Pa·s              | Dynamic viscosity                      | Domain 1  | Meta    |
| spf.srijxx | ux                                                                                           | 1/s               | Strain rate tensor, xx component       | Domain 1  |         |
| spf.srijyx | 0.5*(vx+uy)                                                                                  | 1/s               | Strain rate tensor, yx component       | Domain 1  |         |

| Name       | Expression      | Unit | Description                        | Selection | Details |
|------------|-----------------|------|------------------------------------|-----------|---------|
| spf.srijzx | 0               | 1/s  | Strain rate tensor, zx component   | Domain 1  |         |
| spf.srijxy | $0.5*(u_y+v_x)$ | 1/s  | Strain rate tensor, xy component   | Domain 1  |         |
| spf.srijyy | $v_y$           | 1/s  | Strain rate tensor, yy component   | Domain 1  |         |
| spf.srijzy | 0               | 1/s  | Strain rate tensor, zy component   | Domain 1  |         |
| spf.srijxz | 0               | 1/s  | Strain rate tensor, xz component   | Domain 1  |         |
| spf.srijyz | 0               | 1/s  | Strain rate tensor, yz component   | Domain 1  |         |
| spf.srijzz | 0               | 1/s  | Strain rate tensor, zz component   | Domain 1  |         |
| spf.rrijxx | 0               | 1/s  | Rotation rate tensor, xx component | Domain 1  |         |
| spf.rrijyx | $0.5*(v_x-u_y)$ | 1/s  | Rotation rate tensor, yx component | Domain 1  |         |
| spf.rrijzx | 0               | 1/s  | Rotation rate tensor, zx component | Domain 1  |         |
| spf.rrijxy | $0.5*(u_y-v_x)$ | 1/s  | Rotation rate tensor, xy component | Domain 1  |         |
| spf.rrijyy | 0               | 1/s  | Rotation rate tensor, yy component | Domain 1  |         |
| spf.rrijzy | 0               | 1/s  | Rotation rate tensor,              | Domain 1  |         |

| Name       | Expression                                                                                                                                                                                                                                                                                      | Unit             | Description                        | Selection | Details     |
|------------|-------------------------------------------------------------------------------------------------------------------------------------------------------------------------------------------------------------------------------------------------------------------------------------------------|------------------|------------------------------------|-----------|-------------|
|            |                                                                                                                                                                                                                                                                                                 |                  | zy component                       |           |             |
| spf.rrijxz | 0                                                                                                                                                                                                                                                                                               | 1/s              | Rotation rate tensor, xz component | Domain 1  |             |
| spf.rrijyz | 0                                                                                                                                                                                                                                                                                               | 1/s              | Rotation rate tensor, yz component | Domain 1  |             |
| spf.rrijzz | 0                                                                                                                                                                                                                                                                                               | 1/s              | Rotation rate tensor, zz component | Domain 1  |             |
| spf.sr     | $\sqrt{2 \cdot \text{spf.srijxx}^2 + 2 \cdot \text{spf.srijxy}^2 + 2 \cdot \text{spf.srijxz}^2 + 2 \cdot \text{spf.srijyx}^2 + 2 \cdot \text{spf.srijyy}^2 + 2 \cdot \text{spf.srijyz}^2 + 2 \cdot \text{spf.srijzx}^2 + 2 \cdot \text{spf.srijzy}^2 + 2 \cdot \text{spf.srijzz}^2 + \epsilon}$ | 1/s              | Shear rate                         | Domain 1  |             |
| spf.rr     | $\sqrt{2 \cdot \text{spf.rrijxx}^2 + 2 \cdot \text{spf.rrijxy}^2 + 2 \cdot \text{spf.rrijxz}^2 + 2 \cdot \text{spf.rrijyx}^2 + 2 \cdot \text{spf.rrijyy}^2 + 2 \cdot \text{spf.rrijyz}^2 + 2 \cdot \text{spf.rrijzx}^2 + 2 \cdot \text{spf.rrijzy}^2 + 2 \cdot \text{spf.rrijzz}^2 + \epsilon}$ | 1/s              | Rotation rate                      | Domain 1  |             |
| spf.divu   | ux+vy                                                                                                                                                                                                                                                                                           | 1/s              | Divergence of velocity field       | Domain 1  |             |
| spf.Fx     | 0                                                                                                                                                                                                                                                                                               | N/m <sup>3</sup> | Volume force, x component          | Domain 1  | + operation |
| spf.Fy     | 0                                                                                                                                                                                                                                                                                               | N/m <sup>3</sup> | Volume                             | Domain 1  | + operation |

| Name           | Expression                                                                                                                                        | Unit                   | Description                            | Selection | Details     |
|----------------|---------------------------------------------------------------------------------------------------------------------------------------------------|------------------------|----------------------------------------|-----------|-------------|
|                |                                                                                                                                                   |                        | force, y component                     |           | on          |
| spf.Fz         | 0                                                                                                                                                 | N/m <sup>3</sup>       | Volume force, z component              | Domain 1  | + operation |
| spf.U          | $\sqrt{u^2+v^2}$                                                                                                                                  | m/s                    | Velocity magnitude                     | Domain 1  |             |
| spf.vorticityx | 0                                                                                                                                                 | 1/s                    | Vorticity field, x component           | Domain 1  |             |
| spf.vorticityy | 0                                                                                                                                                 | 1/s                    | Vorticity field, y component           | Domain 1  |             |
| spf.vorticityz | $v_x - u_y$                                                                                                                                       | 1/s                    | Vorticity field, z component           | Domain 1  |             |
| spf.vort_magn  | $\sqrt{\text{spf.vorticityx}^2 + \text{spf.vorticityy}^2 + \text{spf.vorticityz}^2}$                                                              | 1/s                    | Vorticity magnitude                    | Domain 1  |             |
| spf.cellRe     | $0.25 * \text{spf.rho} * \sqrt{\text{emetric\_spatial}(u - d(x, \text{TIME}), v - d(y, \text{TIME})) / \text{emetric2\_spatial}} / \text{spf.mu}$ | 1                      | Cell Reynolds number                   | Domain 1  |             |
| spf.nu         | $\text{spf.mu} / \text{spf.rho}$                                                                                                                  | m <sup>2</sup> /s      | Kinematic viscosity                    | Domain 1  |             |
| spf.betaT      | 0                                                                                                                                                 | 1/Pa                   | Isothermal compressibility coefficient | Domain 1  |             |
| spf.Qm         | 0                                                                                                                                                 | kg/(m <sup>3</sup> .s) | Source term                            | Domain 1  | + operation |
| spf.Fgtotx     | 0                                                                                                                                                 | N/m <sup>3</sup>       | Gravity force, x component             | Domain 1  | + operation |
| spf.Fgtoty     | 0                                                                                                                                                 | N/m <sup>3</sup>       | Gravity force, y component             | Domain 1  | + operation |
| spf.Fgtotz     | 0                                                                                                                                                 | N/m <sup>3</sup>       | Gravity                                | Domain 1  | + operation |

| Name                  | Expression                                      | Unit             | Description                         | Selection       | Details     |
|-----------------------|-------------------------------------------------|------------------|-------------------------------------|-----------------|-------------|
|                       |                                                 |                  | force, z component                  |                 | on          |
| spf.mu_eff            | spf.mu+spf.muT                                  | Pa·s             | Dynamic viscosity                   | Domain 1        |             |
| spf.muT               | 0                                               | Pa·s             | Turbulent dynamic viscosity         | Domain 1        |             |
| spf.T_stressx         | spf.K_stressx - p*spf.nxmesh                    | N/m <sup>2</sup> | Total stress, x component           | Boundaries 1–12 | + operation |
| spf.T_stressy         | spf.K_stressy - p*spf.nymesh                    | N/m <sup>2</sup> | Total stress, y component           | Boundaries 1–12 | + operation |
| spf.T_stressz         | spf.K_stressz - p*spf.nzmesh                    | N/m <sup>2</sup> | Total stress, z component           | Boundaries 1–12 | + operation |
| spf.K_stressx         | spf.mu_eff*(2*ux*spf.nxmesh+(uy+vx)*spf.nymesh) | N/m <sup>2</sup> | Viscous stress, x component         | Boundaries 1–12 | + operation |
| spf.K_stressy         | spf.mu_eff*((vx+uy)*spf.nxmesh+2*vy*spf.nymesh) | N/m <sup>2</sup> | Viscous stress, y component         | Boundaries 1–12 | + operation |
| spf.K_stressz         | 0                                               | N/m <sup>2</sup> | Viscous stress, z component         | Boundaries 1–12 | + operation |
| spf.K_stress_tensorxx | 2*spf.mu_eff*ux                                 | N/m <sup>2</sup> | Viscous stress tensor, xx component | Domain 1        | + operation |
| spf.K_stress_tensoryx | spf.mu_eff*(vx+uy)                              | N/m <sup>2</sup> | Viscous stress tensor, yx component | Domain 1        | + operation |
| spf.K_stress_tensorzx | 0                                               | N/m <sup>2</sup> | Viscous stress tensor, zx component | Domain 1        | + operation |

| Name                        | Expression                     | Unit             | Description                              | Selection | Details     |
|-----------------------------|--------------------------------|------------------|------------------------------------------|-----------|-------------|
| spf.K_stress_tensorxy       | spf.mu_eff*(uy+vx)             | N/m <sup>2</sup> | Viscous stress tensor, xy component      | Domain 1  | + operation |
| spf.K_stress_tensoryy       | 2*spf.mu_eff*vy                | N/m <sup>2</sup> | Viscous stress tensor, yy component      | Domain 1  | + operation |
| spf.K_stress_tensorzy       | 0                              | N/m <sup>2</sup> | Viscous stress tensor, zy component      | Domain 1  | + operation |
| spf.K_stress_tensorxz       | 0                              | N/m <sup>2</sup> | Viscous stress tensor, xz component      | Domain 1  | + operation |
| spf.K_stress_tensoryz       | 0                              | N/m <sup>2</sup> | Viscous stress tensor, yz component      | Domain 1  | + operation |
| spf.K_stress_tensorzz       | 0                              | N/m <sup>2</sup> | Viscous stress tensor, zz component      | Domain 1  | + operation |
| spf.K_stress_tensor_testx_x | 2*spf.mu_eff*test(ux)          | N/m <sup>2</sup> | Viscous stress tensor test, xx component | Domain 1  | + operation |
| spf.K_stress_tensor_testy_x | spf.mu_eff*(test(vx)+test(uy)) | N/m <sup>2</sup> | Viscous stress tensor test, yx component | Domain 1  | + operation |
| spf.K_stress_tensor_testz_x | 0                              | N/m <sup>2</sup> | Viscous stress tensor test, zx component | Domain 1  | + operation |
| spf.K_stress_tensor_testx_y | spf.mu_eff*(test(uy)+test(vx)) | N/m <sup>2</sup> | Viscous stress tensor test, xy component | Domain 1  | + operation |

| Name                       | Expression                                  | Unit             | Description                              | Selection | Details     |
|----------------------------|---------------------------------------------|------------------|------------------------------------------|-----------|-------------|
| spf.K_stress_tensor_testy  | $2 * \text{spf.mu\_eff} * \text{test}(v_y)$ | N/m <sup>2</sup> | Viscous stress tensor test, yy component | Domain 1  | + operation |
| spf.K_stress_tensor_testz  | 0                                           | N/m <sup>2</sup> | Viscous stress tensor test, zy component | Domain 1  | + operation |
| spf.K_stress_tensor_testxz | 0                                           | N/m <sup>2</sup> | Viscous stress tensor test, xz component | Domain 1  | + operation |
| spf.K_stress_tensor_testyz | 0                                           | N/m <sup>2</sup> | Viscous stress tensor test, yz component | Domain 1  | + operation |
| spf.K_stress_tensor_testzz | 0                                           | N/m <sup>2</sup> | Viscous stress tensor test, zz component | Domain 1  | + operation |
| spf.upwind_helpx           | $u - d(x, \text{TIME})$                     | m/s              | Upwind term, x component                 | Domain 1  | + operation |
| spf.upwind_helpy           | $v - d(y, \text{TIME})$                     | m/s              | Upwind term, y component                 | Domain 1  | + operation |
| spf.upwind_helpz           | 0                                           | m/s              | Upwind term, z component                 | Domain 1  | + operation |
| spf.tau_vdxx               | $2 * \text{spf.mu} * \text{spf.srijxx}$     | Pa               | Viscous stress tensor, xx component      | Domain 1  | + operation |
| spf.tau_vdyx               | $2 * \text{spf.mu} * \text{spf.srijyx}$     | Pa               | Viscous stress tensor, yx component      | Domain 1  | + operation |
| spf.tau_vdzx               | $2 * \text{spf.mu} * \text{spf.srijzx}$     | Pa               | Viscous stress                           | Domain 1  | + operation |



| Name             | Expression                                                                                                       | Unit             | Description                         | Selection | Details     |
|------------------|------------------------------------------------------------------------------------------------------------------|------------------|-------------------------------------|-----------|-------------|
|                  |                                                                                                                  |                  | tensor, zx component                |           |             |
| spf.tau_vdxy     | $2 * \text{spf.mu} * \text{spf.srijxy}$                                                                          | Pa               | Viscous stress tensor, xy component | Domain 1  | + operation |
| spf.tau_vdyy     | $2 * \text{spf.mu} * \text{spf.srijyy}$                                                                          | Pa               | Viscous stress tensor, yy component | Domain 1  | + operation |
| spf.tau_vdzy     | $2 * \text{spf.mu} * \text{spf.srijzy}$                                                                          | Pa               | Viscous stress tensor, zy component | Domain 1  | + operation |
| spf.tau_vdxz     | $2 * \text{spf.mu} * \text{spf.srijxz}$                                                                          | Pa               | Viscous stress tensor, xz component | Domain 1  | + operation |
| spf.tau_vdyz     | $2 * \text{spf.mu} * \text{spf.srijyz}$                                                                          | Pa               | Viscous stress tensor, yz component | Domain 1  | + operation |
| spf.tau_vdzz     | $2 * \text{spf.mu} * \text{spf.srijzz}$                                                                          | Pa               | Viscous stress tensor, zz component | Domain 1  | + operation |
| spf.Qvd          | $\text{spf.tau\_vdxx} * u_x + \text{spf.tau\_vdx} * u_y + \text{spf.tau\_vdy} * u_x + \text{spf.tau\_vdy} * u_y$ | W/m <sup>3</sup> | Viscous dissipation                 | Domain 1  | + operation |
| spf.epsilon_p    | 1                                                                                                                | 1                | Porosity                            | Domain 1  |             |
| spf.Fst_tensorxx | 0                                                                                                                | N/m <sup>2</sup> | Surface tension force, xx component | Domain 1  | + operation |
| spf.Fst_tensoryx | 0                                                                                                                | N/m <sup>2</sup> | Surface tension force, yx component | Domain 1  | + operation |
| spf.Fst_tensorz  | 0                                                                                                                | N/m <sup>2</sup> | Surface tension                     | Domain 1  | + operation |

| Name                   | Expression                                                        | Unit                   | Description                         | Selection | Details     |
|------------------------|-------------------------------------------------------------------|------------------------|-------------------------------------|-----------|-------------|
|                        |                                                                   |                        | force, zx component                 |           |             |
| spf.Fst_tensoryx       | 0                                                                 | N/m <sup>2</sup>       | Surface tension force, xy component | Domain 1  | + operation |
| spf.Fst_tensoryy       | 0                                                                 | N/m <sup>2</sup>       | Surface tension force, yy component | Domain 1  | + operation |
| spf.Fst_tensoryz       | 0                                                                 | N/m <sup>2</sup>       | Surface tension force, zy component | Domain 1  | + operation |
| spf.Fst_tensoryxz      | 0                                                                 | N/m <sup>2</sup>       | Surface tension force, xz component | Domain 1  | + operation |
| spf.Fst_tensoryyz      | 0                                                                 | N/m <sup>2</sup>       | Surface tension force, yz component | Domain 1  | + operation |
| spf.Fst_tensoryzz      | 0                                                                 | N/m <sup>2</sup>       | Surface tension force, zz component | Domain 1  | + operation |
| spf.continuityEquation | spf.rho*spf.divu                                                  | kg/(m <sup>3</sup> .s) | Continuity equation                 | Domain 1  |             |
| spf.contCoeff          | spf.rho                                                           | kg/m <sup>3</sup>      | Help variable                       | Domain 1  |             |
| spf.res_u              | px+spf.rho*u*ux+spf.rho*v*uy-(d(2*ux,x)+d(uy+vx,y))*spf.mu-spf.Fx | N/m <sup>3</sup>       | Equation residual                   | Domain 1  |             |
| spf.res_v              | spf.rho*u*vx+py+spf.rho*v*vy-(d(vx+uy,x)+d(2*vy,y))*spf.mu-spf.Fy | N/m <sup>3</sup>       | Equation residual                   | Domain 1  |             |
| spf.res_p              | spf.rho*spf.divu                                                  | kg/(m <sup>3</sup> .s) | Pressure equation                   | Domain 1  |             |

| Name | Expression | Unit | Description | Selection | Details |
|------|------------|------|-------------|-----------|---------|
|      |            |      | residual    |           |         |

### Shape functions

| Name | Shape function       | Unit | Description                 | Shape frame | Selection |
|------|----------------------|------|-----------------------------|-------------|-----------|
| u    | Lagrange (Quadratic) | m/s  | Velocity field, x component | Spatial     | Domain 1  |
| v    | Lagrange (Quadratic) | m/s  | Velocity field, y component | Spatial     | Domain 1  |
| p    | Lagrange (Linear)    | Pa   | Pressure                    | Spatial     | Domain 1  |

### Weak expressions

| Weak expression                                                                                                                                                 | Integration order | Integration frame | Selection |
|-----------------------------------------------------------------------------------------------------------------------------------------------------------------|-------------------|-------------------|-----------|
| (p-<br>spf.K_stress_tensorxx)*test(ux)<br>-<br>spf.K_stress_tensorxy*test(uy)<br>-<br>spf.K_stress_tensoryx*test(vx)<br>+(p-<br>spf.K_stress_tensoryy)*test(vy) | 4                 | Spatial           | Domain 1  |
| spf.Fx*test(u)+spf.Fy*test(v)                                                                                                                                   | 4                 | Spatial           | Domain 1  |
| spf.rho*(-<br>(d(u,x)*u+d(u,y)*v)*test(u)-<br>(d(v,x)*u+d(v,y)*v)*test(v))                                                                                      | 4                 | Spatial           | Domain 1  |
| -<br>spf.continuityEquation*test(p)                                                                                                                             | 4                 | Spatial           | Domain 1  |
| spf.streamlinens                                                                                                                                                | 4                 | Spatial           | Domain 1  |
| spf.crosswindns                                                                                                                                                 | 4                 | Spatial           | Domain 1  |
| (spf.usePseudoTimeStepping<br>>0)*spf.rho*spf.tsti*(-(u-<br>nojac(u))*test(u)-(v-<br>nojac(v))*test(v))                                                         | 4                 | Spatial           | Domain 1  |

## 2.4.4 Initial Values 1



*Initial Values 1*

### SELECTION

|                        |                                          |
|------------------------|------------------------------------------|
| Geometric entity level | Domain                                   |
| Selection              | Geometry geom1: Dimension 2: All domains |

### Initial values

#### SETTINGS

| Description                 | Value |
|-----------------------------|-------|
| Velocity field, x component | 0     |
| Velocity field, y component | 0     |
| Velocity field, z component | 0     |
| Pressure                    | 0     |

### Coordinate system selection

#### SETTINGS

| Description       | Value                    |
|-------------------|--------------------------|
| Coordinate system | Global coordinate system |

#### USED PRODUCTS

|                        |
|------------------------|
| COMSOL<br>Multiphysics |
|------------------------|

## Variables

| Name        | Expression | Unit | Description                 | Selection |
|-------------|------------|------|-----------------------------|-----------|
| spf.u_initx | 0          | m/s  | Velocity field, x component | Domain 1  |
| spf.u_inity | 0          | m/s  | Velocity field, y component | Domain 1  |
| spf.u_initz | 0          | m/s  | Velocity field, z component | Domain 1  |
| spf.p_init  | 0          | Pa   | Pressure                    | Domain 1  |

## 2.4.5 Wall 1

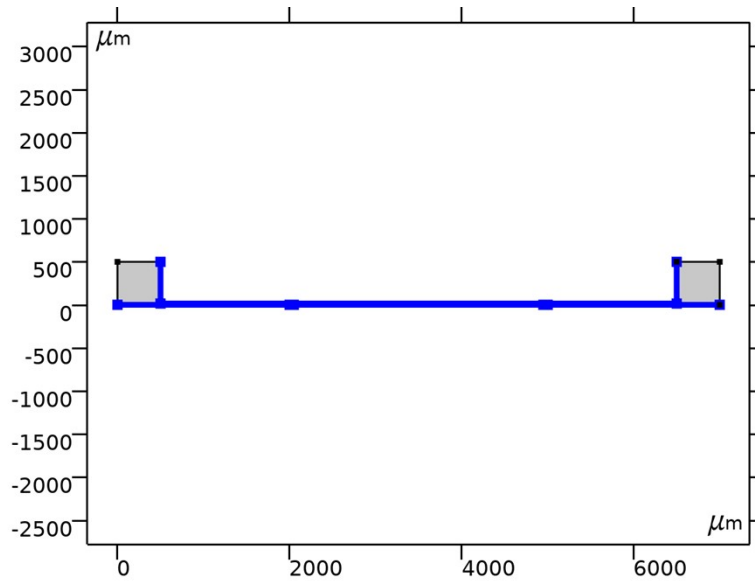

### Wall 1

#### SELECTION

|                        |                                             |
|------------------------|---------------------------------------------|
| Geometric entity level | Boundary                                    |
| Selection              | Geometry geom1: Dimension 1: All boundaries |

#### EQUATIONS

$$\mathbf{u} = \mu_{eo} \mathbf{E}_t$$

$$\mu_{eo} = -\frac{\epsilon_r \epsilon_0 \zeta}{\mu}, \quad \mathbf{E}_t = \mathbf{E} - (\mathbf{E} \cdot \mathbf{n})\mathbf{n}$$

### Boundary condition

#### SETTINGS

| Description             | Value                    |
|-------------------------|--------------------------|
| Wall condition          | Electroosmotic velocity  |
| Electric field          | Electric field (es/ccn1) |
| Electroosmotic mobility | Built - in expression    |

| Description           | Value      |
|-----------------------|------------|
| Zeta potential        | (-0.08)[V] |
| Relative permittivity | 80         |

## Wall movement

### SETTINGS

| Description            | Value                |
|------------------------|----------------------|
| Translational velocity | Automatic from frame |
| Sliding wall           | Off                  |

## Variables

| Name                 | Expression                                                                                                                                    | Unit             | Description                                  | Selection              | Details |
|----------------------|-----------------------------------------------------------------------------------------------------------------------------------------------|------------------|----------------------------------------------|------------------------|---------|
| spf.KStressn_avx     | spf.K_stress_tens<br>orxx*spf.nxmesh<br>+spf.K_stress_t<br>ensorxy*spf.nyme<br>sh+spf.K_stress_<br>tensorxz*spf.nz<br>mesh                    | N/m <sup>2</sup> | Average<br>viscous<br>stress, x<br>component | Boundarie<br>s 2, 4–10 |         |
| spf.KStressn_avy     | spf.K_stress_tens<br>oryx*spf.nxmesh<br>+spf.K_stress_t<br>ensoryy*spf.nyme<br>sh+spf.K_stress_<br>tensoryz*spf.nz<br>mesh                    | N/m <sup>2</sup> | Average<br>viscous<br>stress, y<br>component | Boundarie<br>s 2, 4–10 |         |
| spf.KStressn_avz     | spf.K_stress_tens<br>orzx*spf.nxmesh<br>+spf.K_stress_t<br>ensorzy*spf.nyme<br>sh+spf.K_stress_<br>tensorzz*spf.nz<br>mesh                    | N/m <sup>2</sup> | Average<br>viscous<br>stress, z<br>component | Boundarie<br>s 2, 4–10 |         |
| spf.KStressTestn_avx | spf.K_stress_tens<br>or_testxx*spf.nx<br>mesh+spf.K_stre<br>ss_tensor_testxy<br>*spf.nymesh+sp<br>f.K_stress_tensor<br>_testxz*spf.nzm<br>esh | N/m <sup>2</sup> | Average<br>viscous<br>stress, x<br>component | Boundarie<br>s 2, 4–10 |         |
| spf.KStressTestn_avy | spf.K_stress_tens<br>or_testyx*spf.nx                                                                                                         | N/m <sup>2</sup> | Average<br>viscous                           | Boundarie<br>s 2, 4–10 |         |

| Name                 | Expression                                                                                                        | Unit              | Description                         | Selection          | Details |
|----------------------|-------------------------------------------------------------------------------------------------------------------|-------------------|-------------------------------------|--------------------|---------|
|                      | mesh+spf.K_stress_tensor_testyy*spf.nymesh+spf.K_stress_tensor_testyz*spf.nymesh                                  |                   | stress, y component                 |                    |         |
| spf.KStressTestn_avz | spf.K_stress_tensor_testzx*spf.nymesh+spf.K_stress_tensor_testzy*spf.nymesh+spf.K_stress_tensor_testzz*spf.nymesh | N/m <sup>2</sup>  | Average viscous stress, z component | Boundaries 2, 4-10 |         |
| spf.ujumpx           | spf.u_herex-spf.u_therex                                                                                          | m/s               | Velocity jump, x component          | Boundaries 2, 4-10 |         |
| spf.ujumpy           | spf.u_herey-spf.u_therey                                                                                          | m/s               | Velocity jump, y component          | Boundaries 2, 4-10 |         |
| spf.ujumpz           | spf.u_herez-spf.u_therez                                                                                          | m/s               | Velocity jump, z component          | Boundaries 2, 4-10 |         |
| spf.meshVol          | meshvol_spatial                                                                                                   | m                 |                                     | Boundaries 2, 4-10 |         |
| spf.meshVollnt       | down(meshvol_spatial)                                                                                             | m <sup>2</sup>    | Volume of interior mesh element     | Boundaries 2, 4-10 |         |
| spf.c_here           | 72*nojac(down(spf.mu))*spf.meshVol/spf.meshVollnt                                                                 | 1                 | Intermediate variable               | Boundaries 2, 4-10 |         |
| spf.sigma_dg_ns      | 4*spf.c_here                                                                                                      | Pa·s/m            |                                     | Boundaries 2, 4-10 |         |
| spf.rhoFace          | down(spf.rho)                                                                                                     | kg/m <sup>3</sup> | Density face value                  | Boundaries 2, 4-10 |         |
| spf.umxTnFace        | (spf.upwind_helpx*spf.nymesh+spf.upwind_helpy*spf.nymesh+spf.upwind_helpz*spf.nymesh<0) *(spf.upwind_help         | m/s               | Relative velocity on face           | Boundaries 2, 4-10 |         |

| Name              | Expression                                                                                                                              | Unit | Description                                    | Selection              | Details |
|-------------------|-----------------------------------------------------------------------------------------------------------------------------------------|------|------------------------------------------------|------------------------|---------|
|                   | px*spf.nxmesh+<br>spf.upwind_help<br>y*spf.nymesh+s<br>pf.upwind_helpz<br>*spf.nzmesh)                                                  |      |                                                |                        |         |
| spf.upwind_n<br>s | spf.rhoFace*spf.<br>umxTnFace*(spf.<br>ujumpx*test(sp<br>u_herex)+spf.uj<br>umpy*test(sp<br>u_herey)+spf.uj<br>mpz*test(sp<br>u_herez)) | Pa   | Upwind term                                    | Boundarie<br>s 2, 4-10 |         |
| spf.zeta          | (-0.08)[V]                                                                                                                              | V    | Zeta<br>potential                              | Boundarie<br>s 2, 4-10 |         |
| spf.epsilonr      | 80                                                                                                                                      | 1    | Relative<br>permittivity                       | Boundarie<br>s 2, 4-10 |         |
| spf.ubndx         | spf.ueox+spf.utr<br>x+spf.usx                                                                                                           | m/s  | Velocity at<br>boundary, x<br>component        | Boundarie<br>s 2, 4-10 |         |
| spf.ubndy         | spf.ueoy+spf.utr<br>y+spf.usy                                                                                                           | m/s  | Velocity at<br>boundary, y<br>component        | Boundarie<br>s 2, 4-10 |         |
| spf.ubndz         | spf.ueoz+spf.utr<br>z+spf.usz                                                                                                           | m/s  | Velocity at<br>boundary, z<br>component        | Boundarie<br>s 2, 4-10 |         |
| spf.usx           | 0                                                                                                                                       | m/s  | Velocity of<br>sliding wall,<br>x<br>component | Boundarie<br>s 2, 4-10 |         |
| spf.usy           | 0                                                                                                                                       | m/s  | Velocity of<br>sliding wall,<br>y<br>component | Boundarie<br>s 2, 4-10 |         |
| spf.usz           | 0                                                                                                                                       | m/s  | Velocity of<br>sliding wall,<br>z<br>component | Boundarie<br>s 2, 4-10 |         |
| spf.utrx          | 0                                                                                                                                       | m/s  | Velocity of<br>moving wall,<br>x<br>component  | Boundarie<br>s 2, 4-10 |         |
| spf.utry          | 0                                                                                                                                       | m/s  | Velocity of<br>moving wall,                    | Boundarie<br>s 2, 4-10 |         |



| Name                      | Expression                                                                                               | Unit                  | Description                          | Selection          | Details     |
|---------------------------|----------------------------------------------------------------------------------------------------------|-----------------------|--------------------------------------|--------------------|-------------|
|                           |                                                                                                          |                       | y component                          |                    |             |
| spf.utrz                  | 0                                                                                                        | m/s                   | Velocity of moving wall, z component | Boundaries 2, 4–10 |             |
| spf.uLeakage <sub>x</sub> | 0                                                                                                        | m/s                   | Leakage velocity, x component        | Boundaries 2, 4–10 | + operation |
| spf.uLeakage <sub>y</sub> | 0                                                                                                        | m/s                   | Leakage velocity, y component        | Boundaries 2, 4–10 | + operation |
| spf.uLeakage <sub>z</sub> | 0                                                                                                        | m/s                   | Leakage velocity, z component        | Boundaries 2, 4–10 | + operation |
| spf.Ex                    | model.input.E1                                                                                           | V/m                   | Electric field, x component          | Boundaries 2, 4–10 | Meta        |
| spf.Ey                    | model.input.E2                                                                                           | V/m                   | Electric field, y component          | Boundaries 2, 4–10 | Meta        |
| spf.Ez                    | model.input.E3                                                                                           | V/m                   | Electric field, z component          | Boundaries 2, 4–10 | Meta        |
| spf.mueo                  | -<br>spf.zeta*epsilon<br>0_const*spf.epsilonr/spf.mu                                                     | m <sup>2</sup> /(V·s) | Electroosmotic mobility              | Boundaries 2, 4–10 |             |
| spf.ueox                  | (spf.Ex-<br>spf.nxmesh*(spf.<br>nxmesh*spf.Ex+<br>spf.nymesh*spf.<br>Ey+spf.nzmesh*<br>spf.Ez))*spf.mueo | m/s                   | Electroosmotic velocity, x component | Boundaries 2, 4–10 |             |
| spf.ueoy                  | (spf.Ey-<br>spf.nymesh*(spf.<br>nxmesh*spf.Ex+<br>spf.nymesh*spf.<br>Ey+spf.nzmesh*<br>spf.Ez))*spf.mueo | m/s                   | Electroosmotic velocity, y component | Boundaries 2, 4–10 |             |
| spf.ueoz                  | (spf.Ez-<br>spf.nzmesh*(spf.                                                                             | m/s                   | Electroosmotic velocity, z           | Boundaries 2, 4–10 |             |

| Name              | Expression                                                                                               | Unit                                               | Description                         | Selection          | Details     |
|-------------------|----------------------------------------------------------------------------------------------------------|----------------------------------------------------|-------------------------------------|--------------------|-------------|
|                   | $nxmesh*spf.Ex+spf.nymesh*spf.Ey+spf.nzmesh*spf.Ez)*spf.mu$                                              |                                                    | component                           |                    |             |
| spf.u_herex       | u                                                                                                        | m/s                                                | Intermediate variable, x component  | Boundaries 2, 4-10 |             |
| spf.u_herey       | v                                                                                                        | m/s                                                | Intermediate variable, y component  | Boundaries 2, 4-10 |             |
| spf.u_herez       | 0                                                                                                        | m/s                                                | Intermediate variable, z component  | Boundaries 2, 4-10 |             |
| spf.u_therex      | spf.ubndx+spf.uLeakagex                                                                                  | m/s                                                | Intermediate variable, x component  | Boundaries 2, 4-10 |             |
| spf.u_therey      | spf.ubndy+spf.uLeakagey                                                                                  | m/s                                                | Intermediate variable, y component  | Boundaries 2, 4-10 |             |
| spf.u_therez      | spf.ubndz+spf.uLeakagez                                                                                  | m/s                                                | Intermediate variable, z component  | Boundaries 2, 4-10 |             |
| spf.contCoeffFace | down(spf.contCoeff)                                                                                      | kg/m <sup>3</sup>                                  | Help variable                       | Boundaries 2, 4-10 |             |
| spf.upwindCont    | $spf.contCoeffFace*(spf.ujumpx*spf.nxmesh+spf.ujumpy*spf.nymesh+spf.ujumpz*spf.nzmesh)*test(p)$          | kg <sup>2</sup> /(m <sup>3</sup> .s <sup>3</sup> ) | Upwind term for continuity equation | Boundaries 2, 4-10 |             |
| spf.pFace         | p                                                                                                        | Pa                                                 | Pressure face value                 | Boundaries 2, 4-10 |             |
| spf.consFlux      | $spf.pFace*(-test(sp.f.u_herex)*spf.nxmesh-test(sp.f.u_herey)*spf.nymesh-test(sp.f.u_herez)*spf.nzmesh)$ | W/m <sup>2</sup>                                   | Conservative flux                   | Boundaries 2, 4-10 | + operation |

## Weak expressions

| Weak expression                                                                                                                                                                                                                                                                                                                                                                                                                                                                                                                                                                                                                                                                | Integration order | Integration frame | Selection          |
|--------------------------------------------------------------------------------------------------------------------------------------------------------------------------------------------------------------------------------------------------------------------------------------------------------------------------------------------------------------------------------------------------------------------------------------------------------------------------------------------------------------------------------------------------------------------------------------------------------------------------------------------------------------------------------|-------------------|-------------------|--------------------|
| $\text{spf.KStressn\_avx} * \text{test}(\text{spf.u\_herex}) + \text{spf.KStressn\_avy} * \text{test}(\text{spf.u\_herey}) + \text{spf.KStressn\_avz} * \text{test}(\text{spf.u\_herez}) + \text{spf.KStressTestn\_avx} * \text{spf.ujumpx} + \text{spf.KStressTestn\_avy} * \text{spf.ujumpy} + \text{spf.KStressTestn\_avz} * \text{spf.ujumpz} - \text{spf.sigma\_dg\_ns} * \text{spf.ujumpx} * \text{test}(\text{spf.u\_herex}) - \text{spf.sigma\_dg\_ns} * \text{spf.ujumpy} * \text{test}(\text{spf.u\_herey}) - \text{spf.sigma\_dg\_ns} * \text{spf.ujumpz} * \text{test}(\text{spf.u\_herez}) + \text{spf.upwind\_ns} + \text{spf.upwindCont} + \text{spf.consFlux}$ | 4                 | Spatial           | Boundaries 2, 4–10 |

## 2.4.6 Inlet 1

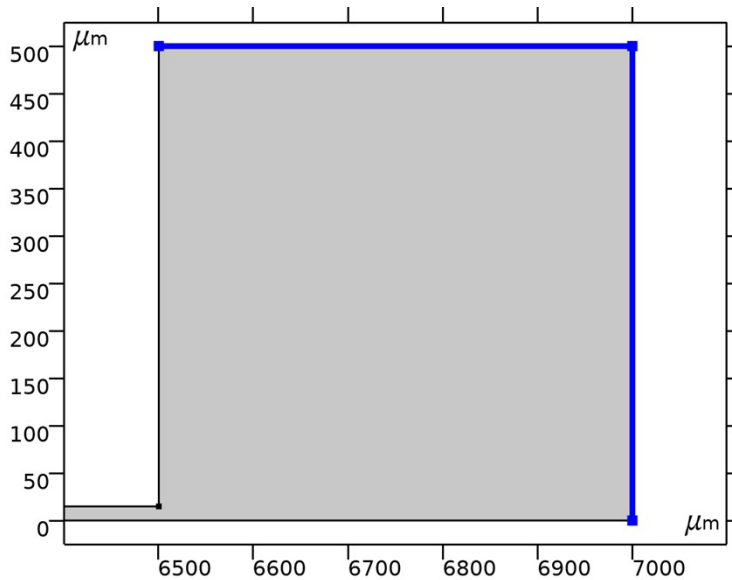

*Inlet 1*

### SELECTION

|                        |                                               |
|------------------------|-----------------------------------------------|
| Geometric entity level | Boundary                                      |
| Selection              | Geometry geom1: Dimension 1: Boundaries 11–12 |

### EQUATIONS

$$\mathbf{n}^T [-p\mathbf{I} + \mathbf{K}] \mathbf{n} = -\hat{p}_0$$

$$\hat{\rho}_0 \geq \rho_0, \mathbf{u} \cdot \mathbf{t} = 0$$

## Boundary condition

### SETTINGS

| Description        | Value    |
|--------------------|----------|
| Boundary condition | Pressure |

## Pressure conditions

### SETTINGS

| Description       | Value       |
|-------------------|-------------|
| Pressure          | 0           |
| Suppress backflow | On          |
| Flow direction    | Normal flow |

### USED PRODUCTS

|                        |
|------------------------|
| COMSOL<br>Multiphysics |
|------------------------|

## Variables

| Name                 | Expression                                                                                         | Unit             | Description                         | Selection        |
|----------------------|----------------------------------------------------------------------------------------------------|------------------|-------------------------------------|------------------|
| spf.KStressn_avx     | spf.K_stress_tensor_xx*spf.nxmesh+spf.K_stress_tensorxy*spf.nymesh+spf.K_stress_tenzorz*spf.nzmesh | N/m <sup>2</sup> | Average viscous stress, x component | Boundaries 11–12 |
| spf.KStressn_avy     | spf.K_stress_tensor_yx*spf.nxmesh+spf.K_stress_tenzory*spf.nymesh+spf.K_stress_tenzoryz*spf.nzmesh | N/m <sup>2</sup> | Average viscous stress, y component | Boundaries 11–12 |
| spf.KStressn_avz     | spf.K_stress_tensor_zx*spf.nxmesh+spf.K_stress_tenzoryz*spf.nymesh+spf.K_stress_tenzorz*spf.nzmesh | N/m <sup>2</sup> | Average viscous stress, z component | Boundaries 11–12 |
| spf.KStressTestn_avx | spf.K_stress_tensor_testxx*spf.nxmesh+spf.K_stress_tenzory_testxy*spf.nymes                        | N/m <sup>2</sup> | Average viscous stress, x           | Boundaries 11–12 |

| Name                 | Expression                                                                                                                                                                       | Unit              | Description                         | Selection        |
|----------------------|----------------------------------------------------------------------------------------------------------------------------------------------------------------------------------|-------------------|-------------------------------------|------------------|
|                      | $h + \text{spf.K\_stress\_tensor\_testxz} * \text{spf.nzmesh}$                                                                                                                   |                   | component                           |                  |
| spf.KStressTestn_avy | $\text{spf.K\_stress\_tensor\_testyx} * \text{spf.nxmesh} + \text{spf.K\_stress\_tensor\_testyy} * \text{spf.nymesh} + \text{spf.K\_stress\_tensor\_testyz} * \text{spf.nzmesh}$ | N/m <sup>2</sup>  | Average viscous stress, y component | Boundaries 11–12 |
| spf.KStressTestn_avz | $\text{spf.K\_stress\_tensor\_testzx} * \text{spf.nxmesh} + \text{spf.K\_stress\_tensor\_testzy} * \text{spf.nymesh} + \text{spf.K\_stress\_tensor\_testzz} * \text{spf.nzmesh}$ | N/m <sup>2</sup>  | Average viscous stress, z component | Boundaries 11–12 |
| spf.ujumpx           | $\text{spf.ut\_herex} - \text{spf.ut\_therex}$                                                                                                                                   | m/s               | Velocity jump, x component          | Boundaries 11–12 |
| spf.ujumpy           | $\text{spf.ut\_herey} - \text{spf.ut\_therey}$                                                                                                                                   | m/s               | Velocity jump, y component          | Boundaries 11–12 |
| spf.ujumpz           | $\text{spf.ut\_herez} - \text{spf.ut\_therez}$                                                                                                                                   | m/s               | Velocity jump, z component          | Boundaries 11–12 |
| spf.meshVol          | meshvol_spatial                                                                                                                                                                  | m                 |                                     | Boundaries 11–12 |
| spf.meshVolInt       | down(meshvol_spatial)                                                                                                                                                            | m <sup>2</sup>    | Volume of interior mesh element     | Boundaries 11–12 |
| spf.c_here           | $288 / \text{spf.epsilon\_p}$                                                                                                                                                    | Pa·s/m            | Intermediate variable               | Boundaries 11–12 |
| spf.sigma_dg_ns      | $4 * \text{spf.ct\_here}$                                                                                                                                                        | Pa·s/m            |                                     | Boundaries 11–12 |
| spf.rhoFace          | down(spfrho)                                                                                                                                                                     | kg/m <sup>3</sup> | Density face value                  | Boundaries 11–12 |
| spf.umxTnFace        | $\text{spf.upwind\_helpx} * \text{spf.nxmesh} + \text{spf.upwind\_helpy} * \text{spf.ny mesh} + \text{spf.upwind\_helpz} * \text{spf.nzmesh}$                                    | m/s               | Relative velocity on face           | Boundaries 11–12 |

| Name                    | Expression                                                                                                           | Unit                                               | Description                                         | Selection        |
|-------------------------|----------------------------------------------------------------------------------------------------------------------|----------------------------------------------------|-----------------------------------------------------|------------------|
| spf.upwind_ns           | spf.backflowPenaltyConv*spf.uNormal                                                                                  | W/m <sup>2</sup>                                   | Upwind term                                         | Boundaries 11–12 |
| spf.p0                  | 0                                                                                                                    | Pa                                                 | Pressure                                            | Boundaries 11–12 |
| spf.f0                  | spf.p0+spf.uNormal*(spf.backflowPenaltyDiff+spf.backflowPenaltyConv)*(spf.uNormal>0)                                 | N/m <sup>2</sup>                                   | Normal stress                                       | Boundaries 11–12 |
| spf.uNormal             | u*nojac(spfxmesh)+v*nojac(spfnmesh)                                                                                  | m/s                                                | Normal velocity                                     | Boundaries 11–12 |
| spf.backflowPenaltyDiff | spf.c_here*min((down(spfxmu)+spfxmuT)*spfxmeshVol/spfxmeshVolInt,down(spfxrho)*abs(spfxuNormal)/down(spfxepsilon_p)) | kg <sup>2</sup> /(m <sup>4</sup> ·s <sup>2</sup> ) | Backflow penalty parameter, diffusive contribution  | Boundaries 11–12 |
| spf.backflowPenaltyConv | spfxrhoFace*spfxumxTnFace/spfxepsilon_p^2                                                                            | kg/(m <sup>2</sup> ·s)                             | Backflow penalty parameter, convective contribution | Boundaries 11–12 |
| spf.inl1.Te0xx          | 0                                                                                                                    |                                                    | Viscoelastic stress tensor, xx component            | Boundaries 11–12 |
| spf.inl1.Te0xy          | 0                                                                                                                    |                                                    | Viscoelastic stress tensor, xy component            | Boundaries 11–12 |
| spf.inl1.Te0xz          | 0                                                                                                                    |                                                    | Viscoelastic stress tensor, xz component            | Boundaries 11–12 |
| spf.inl1.Te0yy          | 0                                                                                                                    |                                                    | Viscoelastic stress tensor, yy component            | Boundaries 11–12 |
| spf.inl1.Te0yz          | 0                                                                                                                    |                                                    | Viscoelastic stress tensor, yz component            | Boundaries 11–12 |

| Name           | Expression                                                                                                                                     | Unit   | Description                              | Selection        |
|----------------|------------------------------------------------------------------------------------------------------------------------------------------------|--------|------------------------------------------|------------------|
| spf.inl1.Te0zz | 0                                                                                                                                              |        | Viscoelastic stress tensor, zz component | Boundaries 11–12 |
| spf.un_here    | $u \cdot \text{nojac}(\text{spf.nxmesh}) + v \cdot \text{nojac}(\text{spf.nymesh})$                                                            | m/s    | Intermediate variable                    | Boundaries 11–12 |
| spf.ut_herex   | $u - \text{spf.un\_here} \cdot \text{nojac}(\text{spf.nxmsh})$                                                                                 | m/s    | Intermediate variable, x component       | Boundaries 11–12 |
| spf.ut_herey   | $v - \text{spf.un\_here} \cdot \text{nojac}(\text{spf.nymesh})$                                                                                | m/s    | Intermediate variable, y component       | Boundaries 11–12 |
| spf.ut_herez   | $- \text{spf.un\_here} \cdot \text{nojac}(\text{spf.nzmesh})$                                                                                  | m/s    | Intermediate variable, z component       | Boundaries 11–12 |
| spf.un_there   | 0                                                                                                                                              | m/s    | Intermediate variable                    | Boundaries 11–12 |
| spf.ut_therex  | $- \text{spf.un\_there} \cdot \text{nojac}(\text{spf.nxmsh})$                                                                                  | m/s    | Intermediate variable, x component       | Boundaries 11–12 |
| spf.ut_therey  | $- \text{spf.un\_there} \cdot \text{nojac}(\text{spf.nymesh})$                                                                                 | m/s    | Intermediate variable, y component       | Boundaries 11–12 |
| spf.ut_therez  | $- \text{spf.un\_there} \cdot \text{nojac}(\text{spf.nzmesh})$                                                                                 | m/s    | Intermediate variable, z component       | Boundaries 11–12 |
| spf.ct_here    | $72 \cdot \text{nojac}(\text{down}((\text{spf.mu} + \text{spf.muT}) / \text{spf.epsilon}_p)) \cdot \text{spf.meshVol} / \text{spf.meshVolume}$ | Pa·s/m | Intermediate variable                    | Boundaries 11–12 |

### Weak expressions

| Weak expression                                                                                                                       | Integration order | Integration frame | Selection        |
|---------------------------------------------------------------------------------------------------------------------------------------|-------------------|-------------------|------------------|
| $- \text{spf.f0} \cdot (\text{test}(u) \cdot \text{spf.nxmsh} + \text{test}(v) \cdot \text{spf.nymsh})$                               | 4                 | Spatial           | Boundaries 11–12 |
| $\text{spf.KStressn\_avx} \cdot \text{test}(\text{spf.ut\_herex}) + \text{spf.KStressn\_avy} \cdot \text{test}(\text{spf.ut\_herey})$ | 4                 | Spatial           | Boundaries 11–12 |

| Weak expression                                                                                                                                                                                                                                                                                                                                                                                                                                                                       | Integration order | Integration frame | Selection |
|---------------------------------------------------------------------------------------------------------------------------------------------------------------------------------------------------------------------------------------------------------------------------------------------------------------------------------------------------------------------------------------------------------------------------------------------------------------------------------------|-------------------|-------------------|-----------|
| $y) + \text{spf.KStressn\_avz} * \text{test}(\text{spf.ut\_herez}) + \text{spf.KStressTestn\_avx} * \text{spf.ujumpx} + \text{spf.KStressTestn\_avy} * \text{spf.ujumpy} + \text{spf.KStressTestn\_avz} * \text{spf.ujumpz} - \text{spf.sigma\_dg\_ns} * \text{spf.ujumpx} * \text{test}(\text{spf.ut\_herex}) - \text{spf.sigma\_dg\_ns} * \text{spf.ujumpy} * \text{test}(\text{spf.ut\_herey}) - \text{spf.sigma\_dg\_ns} * \text{spf.ujumpz} * \text{test}(\text{spf.ut\_herez})$ |                   |                   |           |

### 2.4.7 Outlet 1

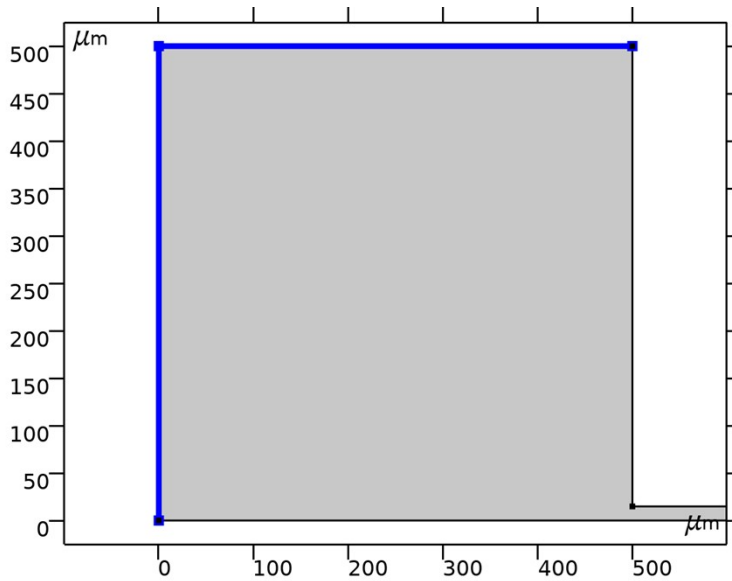

Outlet 1

#### SELECTION

|                        |                                              |
|------------------------|----------------------------------------------|
| Geometric entity level | Boundary                                     |
| Selection              | Geometry geom1: Dimension 1: Boundaries 1, 3 |

#### EQUATIONS

$$[-p\mathbf{I} + \mathbf{K}]\mathbf{n} = -\hat{p}_0\mathbf{n}$$

$$\hat{p}_0 \leq p_0,$$



## Boundary condition

### SETTINGS

| Description        | Value    |
|--------------------|----------|
| Boundary condition | Pressure |

## Pressure conditions

### SETTINGS

| Description       | Value |
|-------------------|-------|
| Pressure          | 0     |
| Normal flow       | Off   |
| Suppress backflow | On    |

### USED PRODUCTS

|                        |
|------------------------|
| COMSOL<br>Multiphysics |
|------------------------|

## Variables

| Name           | Expression                                                                           | Unit              | Description                     | Selection       |
|----------------|--------------------------------------------------------------------------------------|-------------------|---------------------------------|-----------------|
| spf.meshVol    | meshvol_spatial                                                                      | m                 |                                 | Boundaries 1, 3 |
| spf.meshVolInt | down(meshvol_spatial)                                                                | m <sup>2</sup>    | Volume of interior mesh element | Boundaries 1, 3 |
| spf.c_here     | 288/spf.epsilon_p                                                                    | Pa·s/m            | Intermediate variable           | Boundaries 1, 3 |
| spf.rhoFace    | down(spf.rho)                                                                        | kg/m <sup>3</sup> | Density face value              | Boundaries 1, 3 |
| spf.umxTnFace  | spf.upwind_helpx*spf.nxmesh+spf.upwind_helpy*spf.ny mesh+spf.upwind_helpz*spf.nzmesh | m/s               | Relative velocity on face       | Boundaries 1, 3 |
| spf.upwind_ns  | spf.backflowPenaltyConv*spf.uNormal                                                  | Pa                | Upwind term                     | Boundaries 1, 3 |
| spf.p0         | 0                                                                                    | Pa                | Pressure                        | Boundaries 1, 3 |
| spf.f0         | spf.p0+spf.uNormal*(spf.backflowPenaltyDiff-                                         | N/m <sup>2</sup>  | Normal stress                   | Boundaries 1, 3 |

| Name                    | Expression                                                                                                                                                                                                                           | Unit                                          | Description                                         | Selection       |
|-------------------------|--------------------------------------------------------------------------------------------------------------------------------------------------------------------------------------------------------------------------------------|-----------------------------------------------|-----------------------------------------------------|-----------------|
|                         | spf.backflowPenaltyConv)*(spf.uNormal<0)                                                                                                                                                                                             |                                               |                                                     |                 |
| spf.uNormal             | $u \cdot \text{nojac}(\text{spf.nxmESH}) + v \cdot \text{nojac}(\text{spf.nymESH})$                                                                                                                                                  | m/s                                           | Normal velocity                                     | Boundaries 1, 3 |
| spf.backflowPenaltyDiff | $\text{spf.c\_here} \cdot \min(\text{down}(\text{spf.mu}) + \text{spf.muT}) \cdot \text{spf.meshVol} / \text{spf.meshVolInt}, \text{down}(\text{spf.rho}) \cdot \text{abs}(\text{spf.uNormal}) / \text{down}(\text{spf.epsilon}_p))$ | $\text{kg}^2 / (\text{m}^4 \cdot \text{s}^2)$ | Backflow penalty parameter, diffusive contribution  | Boundaries 1, 3 |
| spf.backflowPenaltyConv | $\text{spf.rhoFace} \cdot \text{spf.umxTnFace} / \text{spf.epsilon}_p^2$                                                                                                                                                             | $\text{kg} / (\text{m}^2 \cdot \text{s})$     | Backflow penalty parameter, convective contribution | Boundaries 1, 3 |
| spf.out1.Uav            | 0                                                                                                                                                                                                                                    | m/s                                           | Average velocity                                    | Global          |
| spf.out1.p0avfdf        | 0                                                                                                                                                                                                                                    | Pa                                            | Average pressure                                    | Global          |
| spf.out1.Mflow          | $\text{spf.out1.intFlow}(\text{spf.rho} \cdot (\text{spf.nx} \cdot u + \text{spf.ny} \cdot v))$                                                                                                                                      | kg/s                                          | Mass flow                                           | Global          |

### Weak expressions

| Weak expression                                                                                              | Integration order | Integration frame | Selection       |
|--------------------------------------------------------------------------------------------------------------|-------------------|-------------------|-----------------|
| -<br>$\text{spf.f0} \cdot (\text{test}(u) \cdot \text{spf.nxmESH} + \text{test}(v) \cdot \text{spf.nymESH})$ | 4                 | Spatial           | Boundaries 1, 3 |

## 2.4.8 Pressure Point Constraint 1

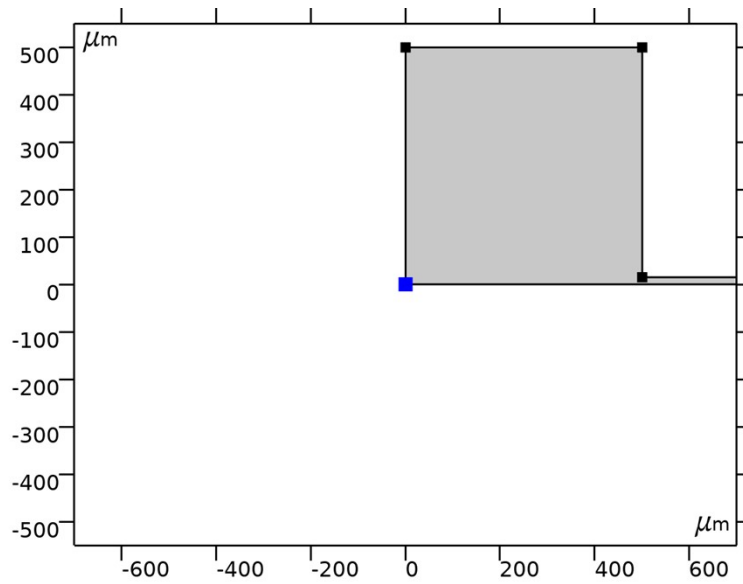

Pressure Point Constraint 1

### SELECTION

|                        |                                      |
|------------------------|--------------------------------------|
| Geometric entity level | Point                                |
| Selection              | Geometry geom1: Dimension 0: Point 1 |

### EQUATIONS

$$p = p_0$$

### Pressure constraint

#### SETTINGS

| Description | Value |
|-------------|-------|
| Pressure    | 0     |

#### USED PRODUCTS

|                        |
|------------------------|
| COMSOL<br>Multiphysics |
|------------------------|

### Variables

| Name   | Expression | Unit | Description | Selection |
|--------|------------|------|-------------|-----------|
| spf.p0 | 0          | Pa   | Pressure    | Point 1   |

## Constraints

| Constraint | Constraint force | Shape function    | Selection | Details   |
|------------|------------------|-------------------|-----------|-----------|
| -p+spf.p0  | test(-p)         | Lagrange (Linear) | Point 1   | Elemental |

## 2.5 ELECTROSTATICS

### USED PRODUCTS

COMSOL  
Multiphysics

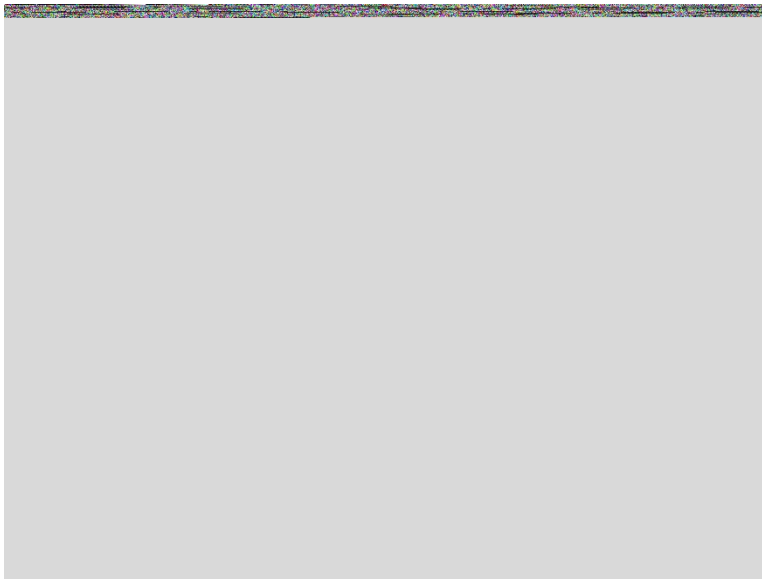

### Electrostatics

#### SELECTION

|                        |                                          |
|------------------------|------------------------------------------|
| Geometric entity level | Domain                                   |
| Selection              | Geometry geom1: Dimension 2: All domains |

#### EQUATIONS

$$\nabla \cdot \mathbf{D} = \rho_v$$

$$\mathbf{E} = -\nabla V$$

### 2.5.1 Interface settings

#### Discretization

##### SETTINGS

| Description        | Value     |
|--------------------|-----------|
| Electric potential | Quadratic |

## Manual terminal sweep settings

### SETTINGS

| Description               | Value   |
|---------------------------|---------|
| Use manual terminal sweep | Off     |
| Reference impedance       | 50[ohm] |

## 2.5.2 Variables

| Name       | Expression | Unit | Description                             | Selection       |
|------------|------------|------|-----------------------------------------|-----------------|
| es.d       | 1.0E-4[m]  | m    | Out-of-plane thickness                  | Domain 1        |
| es.nx      | dnx        |      | Normal vector, x component              | Boundaries 1–12 |
| es.ny      | dny        |      | Normal vector, y component              | Boundaries 1–12 |
| es.nz      | 0          |      | Normal vector, z component              | Boundaries 1–12 |
| es.nmeshx  | dnxmesh    |      | Mesh normal vector, x component         | Boundaries 1–12 |
| es.nmeshy  | dnymesh    |      | Mesh normal vector, y component         | Boundaries 1–12 |
| es.nmeshz  | 0          |      | Mesh normal vector, z component         | Boundaries 1–12 |
| es.unmeshx | unxmesh    |      | Mesh normal vector, upside, x component | Boundaries 1–12 |
| es.unmeshy | unymesh    |      | Mesh normal vector,                     | Boundaries 1–12 |

| Name       | Expression                                                                                                                                                                                                                                              | Unit | Description                                           | Selection       |
|------------|---------------------------------------------------------------------------------------------------------------------------------------------------------------------------------------------------------------------------------------------------------|------|-------------------------------------------------------|-----------------|
|            |                                                                                                                                                                                                                                                         |      | upside, y component                                   |                 |
| es.unmeshz | 0                                                                                                                                                                                                                                                       |      | Mesh normal vector, upside, z component               | Boundaries 1–12 |
| es.dnmeshx | dnxmesh                                                                                                                                                                                                                                                 |      | Mesh normal vector, downside, x component             | Boundaries 1–12 |
| es.dnmeshy | dnymesh                                                                                                                                                                                                                                                 |      | Mesh normal vector, downside, y component             | Boundaries 1–12 |
| es.dnmeshz | 0                                                                                                                                                                                                                                                       |      | Mesh normal vector, downside, z component             | Boundaries 1–12 |
| es.l_sXX   | $(\text{spatial.invF11} * (\text{spatial.invF11} * \text{es.l\_sxx} + \text{spatial.invF21} * \text{es.l\_syx}) + \text{spatial.invF21} * (\text{spatial.invF11} * \text{es.l\_sxy} + \text{spatial.invF21} * \text{es.l\_syy})) * \text{spatial.detF}$ | 1    | Spatial identity matrix, material frame, XX component | Domain 1        |
| es.l_sYX   | $(\text{spatial.invF11} * (\text{spatial.invF12} * \text{es.l\_sxx} + \text{spatial.invF22} * \text{es.l\_syx}) + \text{spatial.invF21} * (\text{spatial.invF12} * \text{es.l\_sxy} + \text{spatial.invF22} * \text{es.l\_syy})) * \text{spatial.detF}$ | 1    | Spatial identity matrix, material frame, YX component | Domain 1        |
| es.l_sZX   | $(\text{spatial.invF11} * \text{es.l\_szx} + \text{spatial.invF21} * \text{es.l\_szy}) * \text{spatial.detF}$                                                                                                                                           | 1    | Spatial identity matrix, material frame, ZX component | Domain 1        |
| es.l_sXY   | $(\text{spatial.invF12} * (\text{spatial.invF11} * \text{es.l\_sxx} + \text{spatial.invF21} * \text{es.l\_syx}) + \text{spatial.invF22} * (\text{spatial.invF11} * \text{es.l\_sxy} + \text{spatial.invF21} * \text{es.l\_syy})) * \text{spatial.detF}$ | 1    | Spatial identity matrix, material frame, XY component | Domain 1        |

| Name     | Expression                                                                                                                                                                                                                      | Unit | Description                                           | Selection |
|----------|---------------------------------------------------------------------------------------------------------------------------------------------------------------------------------------------------------------------------------|------|-------------------------------------------------------|-----------|
|          | $l_{sxx} + \text{spatial.invF21} * es.l_{syx} + \text{spatial.invF22} * (\text{spatial.invF11} * es.l_{sxy} + \text{spatial.invF21} * es.l_{syy}) * \text{spatial.detF}$                                                        |      | identity matrix, material frame, XY component         |           |
| es.l_sYY | $(\text{spatial.invF12} * (\text{spatial.invF12} * es.l_{sxx} + \text{spatial.invF22} * es.l_{syx}) + \text{spatial.invF22} * (\text{spatial.invF12} * es.l_{sxy} + \text{spatial.invF22} * es.l_{syy})) * \text{spatial.detF}$ | 1    | Spatial identity matrix, material frame, YY component | Domain 1  |
| es.l_sZY | $(\text{spatial.invF12} * es.l_{szx} + \text{spatial.invF22} * es.l_{szy}) * \text{spatial.detF}$                                                                                                                               | 1    | Spatial identity matrix, material frame, ZY component | Domain 1  |
| es.l_sXZ | $(\text{spatial.invF11} * es.l_{sxz} + \text{spatial.invF21} * es.l_{szy}) * \text{spatial.detF}$                                                                                                                               | 1    | Spatial identity matrix, material frame, XZ component | Domain 1  |
| es.l_sYZ | $(\text{spatial.invF12} * es.l_{sxz} + \text{spatial.invF22} * es.l_{szy}) * \text{spatial.detF}$                                                                                                                               | 1    | Spatial identity matrix, material frame, YZ component | Domain 1  |
| es.l_sZZ | $es.l_{szz} * \text{spatial.detF}$                                                                                                                                                                                              | 1    | Spatial identity matrix, material frame, ZZ component | Domain 1  |
| es.l_sxx | 1                                                                                                                                                                                                                               | 1    | Spatial identity matrix, xx component                 | Domain 1  |
| es.l_syx | 0                                                                                                                                                                                                                               | 1    | Spatial identity matrix, yx component                 | Domain 1  |
| es.l_szx | 0                                                                                                                                                                                                                               | 1    | Spatial                                               | Domain 1  |

| Name     | Expression | Unit | Description                                       | Selection       |
|----------|------------|------|---------------------------------------------------|-----------------|
|          |            |      | identity matrix, zx component                     |                 |
| es.l_sxy | 0          | 1    | Spatial identity matrix, xy component             | Domain 1        |
| es.l_syy | 1          | 1    | Spatial identity matrix, yy component             | Domain 1        |
| es.l_szy | 0          | 1    | Spatial identity matrix, zy component             | Domain 1        |
| es.l_sxz | 0          | 1    | Spatial identity matrix, xz component             | Domain 1        |
| es.l_syz | 0          | 1    | Spatial identity matrix, yz component             | Domain 1        |
| es.l_szz | 1          | 1    | Spatial identity matrix, zz component             | Domain 1        |
| es.unTx  | es.unTex   | Pa   | Maxwell upward surface stress tensor, x component | Boundaries 1–12 |
| es.unTy  | es.unTey   | Pa   | Maxwell upward surface stress tensor, y component | Boundaries 1–12 |
| es.unTz  | es.unTez   | Pa   | Maxwell upward surface stress                     | Boundaries 1–12 |



| Name    | Expression | Unit | Description                                         | Selection       |
|---------|------------|------|-----------------------------------------------------|-----------------|
|         |            |      | tensor, z component                                 |                 |
| es.dnTx | es.dnTex   | Pa   | Maxwell downward surface stress tensor, x component | Boundaries 1–12 |
| es.dnTy | es.dnTey   | Pa   | Maxwell downward surface stress tensor, y component | Boundaries 1–12 |
| es.dnTz | es.dnTez   | Pa   | Maxwell downward surface stress tensor, z component | Boundaries 1–12 |
| es.unx  | unx        |      | Normal vector up direction, x component             | Boundaries 1–12 |
| es.uny  | uny        |      | Normal vector up direction, y component             | Boundaries 1–12 |
| es.unz  | 0          |      | Normal vector up direction, z component             | Boundaries 1–12 |
| es.dnx  | dnx        |      | Normal vector down direction, x component           | Boundaries 1–12 |
| es.dny  | dny        |      | Normal vector down direction, y component           | Boundaries 1–12 |
| es.dnz  | 0          |      | Normal                                              | Boundaries      |

| Name     | Expression                                                                                                                                                                                                                   | Unit | Description                                                  | Selection       |
|----------|------------------------------------------------------------------------------------------------------------------------------------------------------------------------------------------------------------------------------|------|--------------------------------------------------------------|-----------------|
|          |                                                                                                                                                                                                                              |      | vector down direction, z component                           | s 1–12          |
| es.unTex | 0                                                                                                                                                                                                                            | Pa   | Maxwell upward electric surface stress tensor, x component   | Boundaries 1–12 |
| es.unTey | 0                                                                                                                                                                                                                            | Pa   | Maxwell upward electric surface stress tensor, y component   | Boundaries 1–12 |
| es.unTez | 0                                                                                                                                                                                                                            | Pa   | Maxwell upward electric surface stress tensor, z component   | Boundaries 1–12 |
| es.dnTex | -<br>0.5*es.unx*(real(down(es.Dx))*real(down(es.Ex))+real(down(es.Dy))*real(down(es.Ey))+real(down(es.Dz))*real(down(es.Ez)))+real(down(es.Dx))*(real(down(es.Ex))*es.unx+real(down(es.Ey))*es.uny+real(down(es.Ez))*es.unz) | Pa   | Maxwell downward electric surface stress tensor, x component | Boundaries 1–12 |
| es.dnTey | -<br>0.5*es.uny*(real(down(es.Dx))*real(down(es.Ex))+real(down(es.Dy))*real(down(es.Ey))+real(down(es.Dz))*real(down(es.Ez)))+real(down(es.Dy))*(real(down(es.Ex))*es.unx+real(down(es.Ey))*es.uny+real(down(es.Ez))*es.unz) | Pa   | Maxwell downward electric surface stress tensor, y component | Boundaries 1–12 |
| es.dnTez | -<br>0.5*es.unz*(real(down(es.Dx))*real(down(es.Ex))+real(down(es.Dy))                                                                                                                                                       | Pa   | Maxwell downward electric                                    | Boundaries 1–12 |

| Name     | Expression                                                                                                                                            | Unit     | Description                        | Selection |
|----------|-------------------------------------------------------------------------------------------------------------------------------------------------------|----------|------------------------------------|-----------|
|          | *real(down(es.Ey))+real(down(es.Dz))*real(down(es.Ez))+real(down(es.Dz))*(real(down(es.Ex))*es.unx+real(down(es.Ey))*es.uny+real(down(es.Ez))*es.unz) |          | surface stress tensor, z component |           |
| es.intWe | es.int_We(es.d*es.dWe)                                                                                                                                | J        | Total electric energy              | Global    |
| es.zref  | 50[ohm]                                                                                                                                               | $\Omega$ | Reference impedance                | Global    |

### 2.5.3 Charge Conservation 1

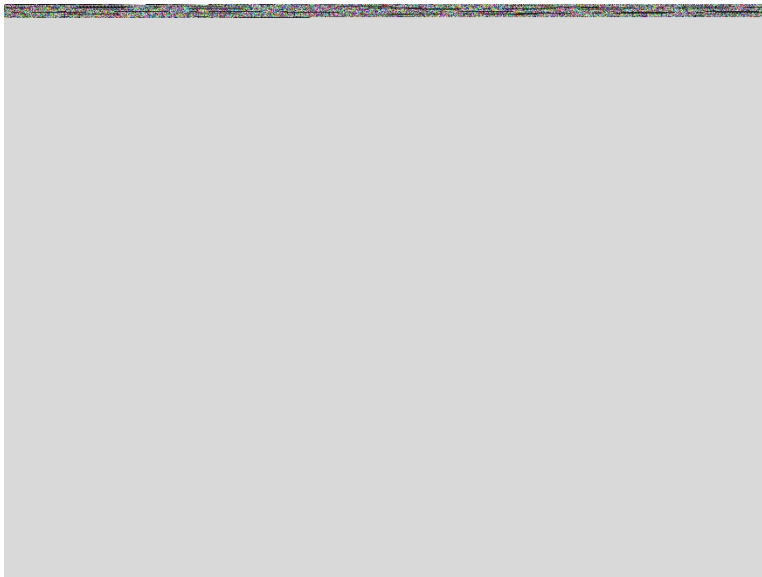

*Charge Conservation 1*

#### SELECTION

|                        |                                          |
|------------------------|------------------------------------------|
| Geometric entity level | Domain                                   |
| Selection              | Geometry geom1: Dimension 2: All domains |

#### EQUATIONS

$$\mathbf{E} = -\nabla V$$

$$\nabla \cdot (\epsilon_0 \epsilon_r \mathbf{E}) = \rho_v$$

**Constitutive relation D-E**

#### SETTINGS

| Description | Value |
|-------------|-------|
|-------------|-------|

| Description           | Value                 |
|-----------------------|-----------------------|
| Dielectric model      | Relative permittivity |
| Relative permittivity | From material         |

### Coordinate system selection

#### SETTINGS

| Description       | Value                    |
|-------------------|--------------------------|
| Coordinate system | Global coordinate system |

#### PROPERTIES FROM MATERIAL

| Property              | Material      | Property group |
|-----------------------|---------------|----------------|
| Relative permittivity | Water, liquid | Basic          |

### Variables

| Name                      | Expression          | Unit             | Description                         | Selection       | Details     |
|---------------------------|---------------------|------------------|-------------------------------------|-----------------|-------------|
| es.nD                     | 0                   | C/m <sup>2</sup> | Surface charge density              | Boundaries 1–12 | + operation |
| es.epsilonrX <sub>X</sub> | material.epsilonr11 | 1                | Relative permittivity, XX component | Domain 1        | Meta        |
| es.epsilonrYX             | material.epsilonr21 | 1                | Relative permittivity, YX component | Domain 1        | Meta        |
| es.epsilonrZX             | material.epsilonr31 | 1                | Relative permittivity, ZX component | Domain 1        | Meta        |
| es.epsilonrXY             | material.epsilonr12 | 1                | Relative permittivity, XY component | Domain 1        | Meta        |
| es.epsilonrYY             | material.epsilonr22 | 1                | Relative permittivity, YY component | Domain 1        | Meta        |
| es.epsilonrZY             | material.epsilonr32 | 1                | Relative permittivity, ZY component | Domain 1        | Meta        |

| Name            | Expression                                                           | Unit             | Description                              | Selection | Details |
|-----------------|----------------------------------------------------------------------|------------------|------------------------------------------|-----------|---------|
|                 |                                                                      |                  | component                                |           |         |
| es.epsilonrXZ   | material.epsilonr13                                                  | 1                | Relative permittivity, XZ component      | Domain 1  | Meta    |
| es.epsilonrYZ   | material.epsilonr23                                                  | 1                | Relative permittivity, YZ component      | Domain 1  | Meta    |
| es.epsilonrZZ   | material.epsilonr33                                                  | 1                | Relative permittivity, ZZ component      | Domain 1  | Meta    |
| es.epsilonr_iso | material.epsilonr_iso                                                | 1                | Relative permittivity, isotropic value   | Domain 1  | Meta    |
| es.Dx           | (spatial.F11*es.DX+spatial.F21*es.DY)*spatial.detInvF                | C/m <sup>2</sup> | Electric displacement field, x component | Domain 1  |         |
| es.Dy           | (spatial.F12*es.DX+spatial.F22*es.DY)*spatial.detInvF                | C/m <sup>2</sup> | Electric displacement field, y component | Domain 1  |         |
| es.Dz           | es.DZ*spatial.detInvF                                                | C/m <sup>2</sup> | Electric displacement field, z component | Domain 1  |         |
| es.Px           | (spatial.F11*es.PX+spatial.F21*es.PY)*spatial.detInvF                | C/m <sup>2</sup> | Polarization, x component                | Domain 1  |         |
| es.Py           | (spatial.F12*es.PX+spatial.F22*es.PY)*spatial.detInvF                | C/m <sup>2</sup> | Polarization, y component                | Domain 1  |         |
| es.Pz           | es.PZ*spatial.detInvF                                                | C/m <sup>2</sup> | Polarization, z component                | Domain 1  |         |
| es.normD        | sqrt(realdot(es.Dx,es.Dx)+realdot(es.Dy,es.Dy)+realdot(es.Dz,es.Dz)) | C/m <sup>2</sup> | Electric displacement field norm         | Domain 1  |         |

| Name     | Expression                                                                                                                                           | Unit             | Description                              | Selection | Details     |
|----------|------------------------------------------------------------------------------------------------------------------------------------------------------|------------------|------------------------------------------|-----------|-------------|
| es.normP | $\sqrt{\text{realdot}(es.Px, es.Px) + \text{realdot}(es.Py, es.Py) + \text{realdot}(es.Pz, es.Pz)}$                                                  | C/m <sup>2</sup> | Polarization norm                        | Domain 1  |             |
| es.DX    | $\epsilon_0 \text{const} * es.l_{sXX} * es.EX + \epsilon_0 \text{const} * es.l_{sXY} * es.EY + \epsilon_0 \text{const} * es.l_{sXZ} * es.EZ + es.PX$ | C/m <sup>2</sup> | Electric displacement field, X component | Domain 1  |             |
| es.DY    | $\epsilon_0 \text{const} * es.l_{sYX} * es.EX + \epsilon_0 \text{const} * es.l_{sYY} * es.EY + \epsilon_0 \text{const} * es.l_{sYZ} * es.EZ + es.PY$ | C/m <sup>2</sup> | Electric displacement field, Y component | Domain 1  |             |
| es.DZ    | $\epsilon_0 \text{const} * es.l_{sZX} * es.EX + \epsilon_0 \text{const} * es.l_{sZY} * es.EY + \epsilon_0 \text{const} * es.l_{sZZ} * es.EZ + es.PZ$ | C/m <sup>2</sup> | Electric displacement field, Z component | Domain 1  |             |
| es.PX    | $\epsilon_0 \text{const} * (es.chi_{XX} * es.EX + es.chi_{XY} * es.EY + es.chi_{XZ} * es.EZ)$                                                        | C/m <sup>2</sup> | Polarization, X component                | Domain 1  | + operation |
| es.PY    | $\epsilon_0 \text{const} * (es.chi_{YX} * es.EX + es.chi_{YY} * es.EY + es.chi_{YZ} * es.EZ)$                                                        | C/m <sup>2</sup> | Polarization, Y component                | Domain 1  | + operation |
| es.PZ    | $\epsilon_0 \text{const} * (es.chi_{ZX} * es.EX + es.chi_{ZY} * es.EY + es.chi_{ZZ} * es.EZ)$                                                        | C/m <sup>2</sup> | Polarization, Z component                | Domain 1  | + operation |
| es.chiXX | $-1 + es.\epsilon_{rXX}$                                                                                                                             | 1                | Electric susceptibility, XX component    | Domain 1  |             |
| es.chiYX | $es.\epsilon_{rYX}$                                                                                                                                  | 1                | Electric susceptibility                  | Domain 1  |             |

| Name     | Expression                                  | Unit | Description                            | Selection       | Details |
|----------|---------------------------------------------|------|----------------------------------------|-----------------|---------|
|          |                                             |      | , YX component                         |                 |         |
| es.chiZX | es.epsilonrZX                               | 1    | Electric susceptibility, ZX component  | Domain 1        |         |
| es.chiXY | es.epsilonrXY                               | 1    | Electric susceptibility, XY component  | Domain 1        |         |
| es.chiYY | -1+es.epsilonrYY                            | 1    | Electric susceptibility, YY component  | Domain 1        |         |
| es.chiZY | es.epsilonrZY                               | 1    | Electric susceptibility, ZY component  | Domain 1        |         |
| es.chiXZ | es.epsilonrXZ                               | 1    | Electric susceptibility, XZ component  | Domain 1        |         |
| es.chiYZ | es.epsilonrYZ                               | 1    | Electric susceptibility, YZ component  | Domain 1        |         |
| es.chiZZ | -1+es.epsilonrZZ                            | 1    | Electric susceptibility, ZZ component  | Domain 1        |         |
| es.Ex    | spatial.invF11*es.EX+spatial.invF12*es.EY   | V/m  | Electric field, x component            | Domain 1        |         |
| es.Ey    | spatial.invF21*es.EX+spatial.invF22*es.EY   | V/m  | Electric field, y component            | Domain 1        |         |
| es.Ez    | es.EZ                                       | V/m  | Electric field, z component            | Domain 1        |         |
| es.tEx   | spatial.invF11*es.tEX+spatial.invF12*es.tEY | V/m  | Tangential electric field, x component | Boundaries 1–12 |         |
| es.tEy   | spatial.invF21*es.tEX+spatial.inv           | V/m  | Tangential electric field,             | Boundaries 1–12 |         |

| Name     | Expression                                                                                          | Unit             | Description                            | Selection       | Details     |
|----------|-----------------------------------------------------------------------------------------------------|------------------|----------------------------------------|-----------------|-------------|
|          | $F22 * es.tEY$                                                                                      |                  | y component                            |                 |             |
| es.tEz   | es.tEZ                                                                                              | V/m              | Tangential electric field, z component | Boundaries 1–12 |             |
| es.EX    | -VX                                                                                                 | V/m              | Electric field, X component            | Domain 1        | + operation |
| es.EY    | -VY                                                                                                 | V/m              | Electric field, Y component            | Domain 1        | + operation |
| es.EZ    | 0                                                                                                   | V/m              | Electric field, Z component            | Domain 1        | + operation |
| es.tEX   | -VTX                                                                                                | V/m              | Tangential electric field, X component | Boundaries 1–12 |             |
| es.tEY   | -VTY                                                                                                | V/m              | Tangential electric field, Y component | Boundaries 1–12 |             |
| es.tEZ   | 0                                                                                                   | V/m              | Tangential electric field, Z component | Boundaries 1–12 |             |
| es.normE | $\sqrt{\text{realdot}(es.Ex, es.Ex) + \text{realdot}(es.Ey, es.Ey) + \text{realdot}(es.Ez, es.Ez)}$ | V/m              | Electric field norm                    | Domain 1        |             |
| es.Jx    | $(\text{spatial.F11} * es.JdX + \text{spatial.F21} * es.JdY) * \text{spatial.d etInvF}$             | A/m <sup>2</sup> | Current density, x component           | Domain 1        | + operation |
| es.Jy    | $(\text{spatial.F12} * es.JdX + \text{spatial.F22} * es.JdY) * \text{spatial.d etInvF}$             | A/m <sup>2</sup> | Current density, y component           | Domain 1        | + operation |
| es.Jz    | $es.JdZ * \text{spatial.d etInvF}$                                                                  | A/m <sup>2</sup> | Current density, z component           | Domain 1        | + operation |
| es.JX    | es.JdX                                                                                              | A/m <sup>2</sup> | Current density, X component           | Domain 1        | + operation |
| es.JY    | es.JdY                                                                                              | A/m <sup>2</sup> | Current density, Y                     | Domain 1        | + operation |



| Name       | Expression                                                                                                                                       | Unit             | Description                               | Selection       | Details     |
|------------|--------------------------------------------------------------------------------------------------------------------------------------------------|------------------|-------------------------------------------|-----------------|-------------|
|            |                                                                                                                                                  |                  | component                                 |                 |             |
| es.JZ      | es.JdZ                                                                                                                                           | A/m <sup>2</sup> | Current density, Z component              | Domain 1        | + operation |
| es.JdX     | 0                                                                                                                                                | A/m <sup>2</sup> | Displacement current density, X component | Domain 1        |             |
| es.JdY     | 0                                                                                                                                                | A/m <sup>2</sup> | Displacement current density, Y component | Domain 1        |             |
| es.JdZ     | 0                                                                                                                                                | A/m <sup>2</sup> | Displacement current density, Z component | Domain 1        |             |
| es.normJ   | sqrt(realdot(es.JX,es.JX)+realdot(es.JY,es.JY)+realdot(es.JZ,es.JZ))                                                                             | A/m <sup>2</sup> | Current density norm                      | Domain 1        |             |
| es.ccn1.nJ | es.unx*(spatial.invf11*down(es.JX)+spatial.invf12*down(es.JY))+es.uny*(spatial.invf21*down(es.JX)+spatial.invf22*down(es.JY))+es.unz*down(es.JZ) | A/m <sup>2</sup> | Inward current density                    | Boundaries 1–12 |             |
| es.W       | es.We                                                                                                                                            | J/m <sup>3</sup> | Energy density                            | Domain 1        | + operation |
| es.dWe     | es.We                                                                                                                                            | J/m <sup>3</sup> | Integrand for total electric energy       | Domain 1        | Meta        |
| es.We      | 0.5*epsilon0_const*((es.l_sXX+es.chiXX)*es.EX+(es.l_sXY+es.chiXY)*es.EY+(es.l_sXZ+es.chiXZ)*es.EZ)*es.EX+((es.l_sYX+es.chiYX)*es.EY+(es.l_s      | J/m <sup>3</sup> | Electric energy density                   | Domain 1        |             |

| Name | Expression                                                                                                                                                                                                                                                                                                         | Unit | Description | Selection | Details |
|------|--------------------------------------------------------------------------------------------------------------------------------------------------------------------------------------------------------------------------------------------------------------------------------------------------------------------|------|-------------|-----------|---------|
|      | $YY + \text{es.chiYY} * \text{es.EY} + (\text{es.l_sYZ} + \text{es.chiYZ}) * \text{es.EZ} * \text{es.EY} + ((\text{es.l_sZX} + \text{es.chiZX}) * \text{es.EX} + (\text{es.l_sZY} + \text{es.chiZY}) * \text{es.EY} + (\text{es.l_sZZ} + \text{es.chiZZ}) * \text{es.EZ}) * \text{es.EZ} * \text{spatial.detInvF}$ |      |             |           |         |

### Shape functions

| Name | Shape function       | Unit | Description        | Shape frame | Selection |
|------|----------------------|------|--------------------|-------------|-----------|
| V    | Lagrange (Quadratic) | V    | Electric potential | Material    | Domain 1  |
| V    | Lagrange (Quadratic) | V    | Electric potential | Spatial     | Domain 1  |
| V    | Lagrange (Quadratic) | V    | Electric potential | Geometry    | Domain 1  |
| V    | Lagrange (Quadratic) | V    | Electric potential | Mesh        | Domain 1  |

### Weak expressions

| Weak expression                                                                    | Integration order | Integration frame | Selection |
|------------------------------------------------------------------------------------|-------------------|-------------------|-----------|
| $-(\text{es.DX} * \text{test}(VX) + \text{es.DY} * \text{test}(VY)) * \text{es.d}$ | 4                 | Material          | Domain 1  |

## 2.5.4 Zero Charge 1

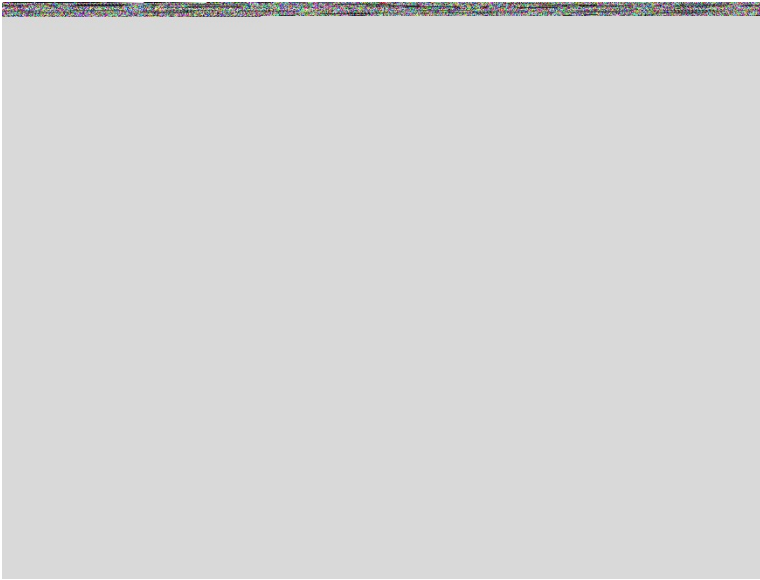

*Zero Charge 1*

### SELECTION

|                        |                                             |
|------------------------|---------------------------------------------|
| Geometric entity level | Boundary                                    |
| Selection              | Geometry geom1: Dimension 1: All boundaries |

### EQUATIONS

$$\mathbf{n} \cdot \mathbf{D} = 0$$

### Variables

| Name  | Expression | Unit             | Description            | Selection          | Details     |
|-------|------------|------------------|------------------------|--------------------|-------------|
| es.nD | 0          | C/m <sup>2</sup> | Surface charge density | Boundaries 2, 4-10 | + operation |

### Shape functions

| Name | Shape function       | Unit | Description        | Shape frame | Selection     | Details |
|------|----------------------|------|--------------------|-------------|---------------|---------|
| V    | Lagrange (Quadratic) | V    | Electric potential | Spatial     | No boundaries | Slit    |
| V    | Lagrange (Quadratic) | V    | Electric potential | Material    | No boundaries | Slit    |
| V    | Lagrange (Quadratic) | V    | Electric potential | Geometry    | No boundaries | Slit    |
| V    | Lagrange (Quadratic) | V    | Electric potential | Mesh        | No boundaries | Slit    |

## 2.5.5 Initial Values 1

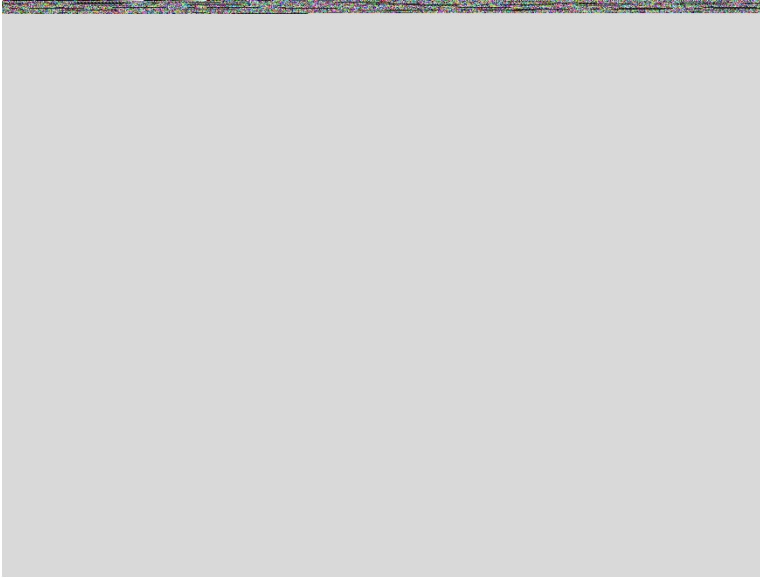

*Initial Values 1*

### SELECTION

|                        |                                          |
|------------------------|------------------------------------------|
| Geometric entity level | Domain                                   |
| Selection              | Geometry geom1: Dimension 2: All domains |

### SETTINGS

| Description        | Value |
|--------------------|-------|
| Electric potential | 0     |

## 2.5.6 Electric Potential 1

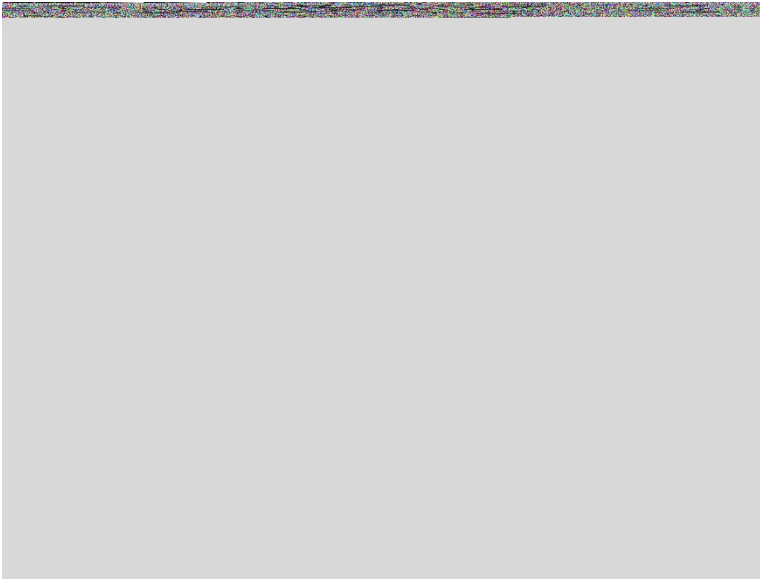

*Electric Potential 1*

### SELECTION

|                        |                                               |
|------------------------|-----------------------------------------------|
| Geometric entity level | Boundary                                      |
| Selection              | Geometry geom1: Dimension 1: Boundaries 11–12 |

### EQUATIONS

$$V = V_0$$

**Electric potential**

### SETTINGS

| Description        | Value |
|--------------------|-------|
| Electric potential | 30    |

**Variables**

| Name  | Expression                                                                                                                                               | Unit             | Description            | Selection        | Details     |
|-------|----------------------------------------------------------------------------------------------------------------------------------------------------------|------------------|------------------------|------------------|-------------|
| es.nD | $(es.unx*(spatial.F11*down(es.DX)+spatial.F21*down(es.DY))+es.uny*(spatial.F12*down(es.DX)+spatial.F22*down(es.DY))+es.unz*down(es.DZ))*spatial.detInvF$ | C/m <sup>2</sup> | Surface charge density | Boundaries 11–12 | + operation |
| es.V0 | 30                                                                                                                                                       | V                | Electric potential     | Boundaries 11–12 |             |

## Constraints

| Constraint | Constraint force | Shape function       | Selection        | Details   |
|------------|------------------|----------------------|------------------|-----------|
| es.V0-V    | test(es.V0-V)    | Lagrange (Quadratic) | Boundaries 11–12 | Elemental |

## 2.5.7 Ground 1

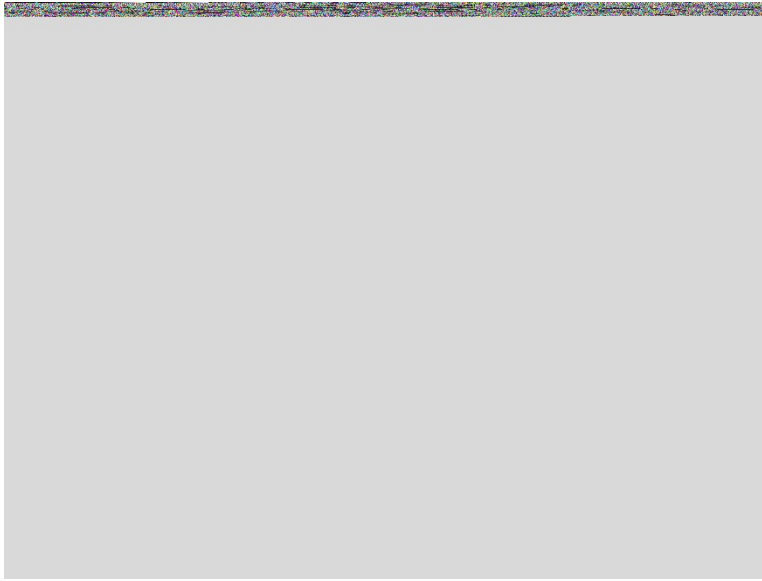

### Ground 1

#### SELECTION

|                        |                                              |
|------------------------|----------------------------------------------|
| Geometric entity level | Boundary                                     |
| Selection              | Geometry geom1: Dimension 1: Boundaries 1, 3 |

#### EQUATIONS

$$V = 0.$$

## Variables

| Name  | Expression                                                                                                                                             | Unit             | Description            | Selection       | Details     |
|-------|--------------------------------------------------------------------------------------------------------------------------------------------------------|------------------|------------------------|-----------------|-------------|
| es.nD | (es.unx*(spatial.F11*down(es.DX)+spatial.F21*down(es.DY))+es.uny*(spatial.F12*down(es.DX)+spatial.F22*down(es.DY))+es.unz*down(es.DZ))*spatial.detInvF | C/m <sup>2</sup> | Surface charge density | Boundaries 1, 3 | + operation |

## Constraints

| Constraint | Constraint force | Shape function       | Selection       | Details   |
|------------|------------------|----------------------|-----------------|-----------|
| -V         | test(-V)         | Lagrange (Quadratic) | Boundaries 1, 3 | Elemental |

## 2.5.8 Space Charge Density 1

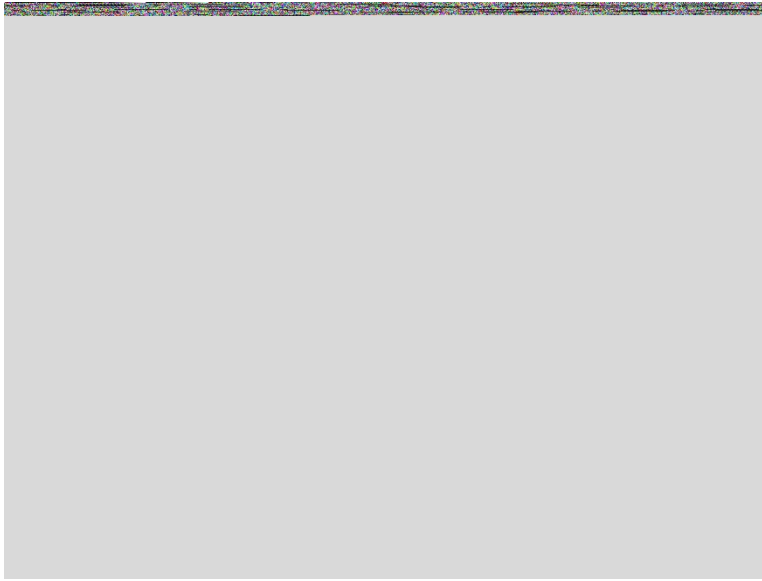

*Space Charge Density 1*

### SELECTION

|                        |                                       |
|------------------------|---------------------------------------|
| Geometric entity level | Domain                                |
| Selection              | Geometry geom1: Dimension 2: Domain 1 |

### EQUATIONS

$$\nabla \cdot \mathbf{D} = \rho_v$$

### Coordinate system selection

#### SETTINGS

| Description       | Value                    |
|-------------------|--------------------------|
| Coordinate system | Global coordinate system |

### Variables

| Name | Expression | Unit | Description | Selection | Details |
|------|------------|------|-------------|-----------|---------|
|------|------------|------|-------------|-----------|---------|

| Name         | Expression                                     | Unit             | Description          | Selection | Details     |
|--------------|------------------------------------------------|------------------|----------------------|-----------|-------------|
| es.scd1.rhoq | $(cK+cH3O-cCl-cBEAD-cOH)*e\_const*N\_A\_const$ | C/m <sup>3</sup> | Space charge density | Domain 1  |             |
| es.rhoq      | es.scd1.rhoq                                   | C/m <sup>3</sup> | Space charge density | Domain 1  | + operation |

### Weak expressions

| Weak expression            | Integration order | Integration frame | Selection |
|----------------------------|-------------------|-------------------|-----------|
| -es.scd1.rhoq*test(V)*es.d | 4                 | Spatial           | Domain 1  |

## 2.6 TRANSPORT OF DILUTED SPECIES

### USED PRODUCTS

|                                      |
|--------------------------------------|
| COMSOL Multiphysics                  |
| Chemical Reaction Engineering Module |

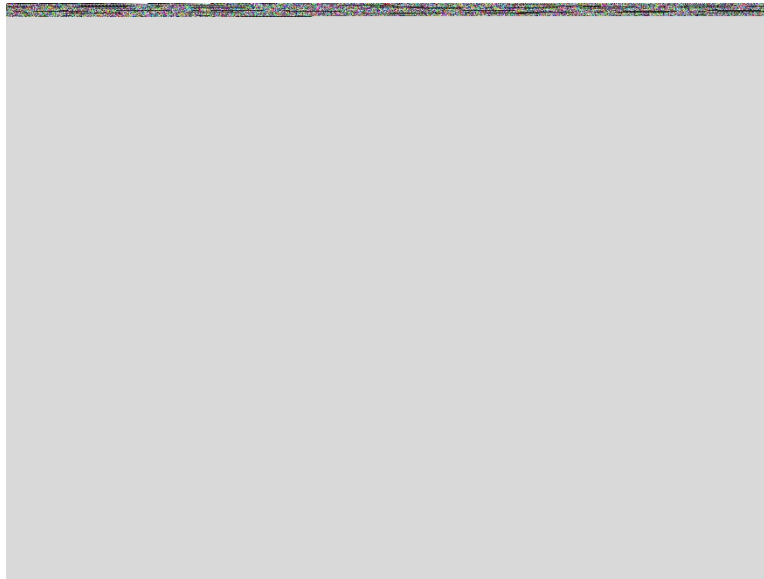

### Transport of Diluted Species

#### SELECTION

|                        |                                          |
|------------------------|------------------------------------------|
| Geometric entity level | Domain                                   |
| Selection              | Geometry geom1: Dimension 2: All domains |

#### EQUATIONS



$$\nabla \cdot \mathbf{J}_i + \mathbf{u} \cdot \nabla C_i = R_i$$

$$\mathbf{J}_i = -D_i \nabla C_i - z_i \mu_{mj} F C_i \nabla V$$

## 2.6.1 Interface settings

### Discretization

#### SETTINGS

| Description   | Value     |
|---------------|-----------|
| Concentration | Quadratic |

### Transport mechanisms

#### SETTINGS

| Description                   | Value |
|-------------------------------|-------|
| Convection                    | On    |
| Migration in electric field   | On    |
| Mass transfer in porous media | Off   |

## 2.6.2 Variables

| Name       | Expression | Unit                    | Description                                         | Selection       | Details     |
|------------|------------|-------------------------|-----------------------------------------------------|-----------------|-------------|
| tds.R_cK   | 0          | mol/(m <sup>3</sup> ·s) | Total rate expression                               | Domain 1        | + operation |
| tds.cP_cK  | 0          | mol/kg                  | Concentration species absorbed to the solid         | Domain 1        | + operation |
| tds.cP_cK  | 0          | mol/kg                  | Concentration species absorbed to the solid         | Boundaries 1–12 | + operation |
| tds.KP_cK  | 0          | m <sup>3</sup> /kg      | Adsorption isotherm, first concentration derivative | Domain 1        | + operation |
| tds.KP_cK  | 0          | m <sup>3</sup> /kg      | Adsorption isotherm, first concentration derivative | Boundaries 1–12 | + operation |
| tds.R_cCl  | 0          | mol/(m <sup>3</sup> ·s) | Total rate expression                               | Domain 1        | + operation |
| tds.cP_cCl | 0          | mol/kg                  | Concentration                                       | Domain 1        | + operation |

| Name        | Expression | Unit                    | Description                                         | Selection       | Details     |
|-------------|------------|-------------------------|-----------------------------------------------------|-----------------|-------------|
|             |            |                         | species absorbed to the solid                       |                 | on          |
| tds.cP_cCl  | 0          | mol/kg                  | Concentration species absorbed to the solid         | Boundaries 1–12 | + operation |
| tds.KP_cCl  | 0          | m <sup>3</sup> /kg      | Adsorption isotherm, first concentration derivative | Domain 1        | + operation |
| tds.KP_cCl  | 0          | m <sup>3</sup> /kg      | Adsorption isotherm, first concentration derivative | Boundaries 1–12 | + operation |
| tds.R_cH3O  | 0          | mol/(m <sup>3</sup> ·s) | Total rate expression                               | Domain 1        | + operation |
| tds.cP_cH3O | 0          | mol/kg                  | Concentration species absorbed to the solid         | Domain 1        | + operation |
| tds.cP_cH3O | 0          | mol/kg                  | Concentration species absorbed to the solid         | Boundaries 1–12 | + operation |
| tds.KP_cH3O | 0          | m <sup>3</sup> /kg      | Adsorption isotherm, first concentration derivative | Domain 1        | + operation |
| tds.KP_cH3O | 0          | m <sup>3</sup> /kg      | Adsorption isotherm, first concentration derivative | Boundaries 1–12 | + operation |
| tds.R_cOH   | 0          | mol/(m <sup>3</sup> ·s) | Total rate expression                               | Domain 1        | + operation |
| tds.cP_cOH  | 0          | mol/kg                  | Concentration species absorbed to the solid         | Domain 1        | + operation |
| tds.cP_cOH  | 0          | mol/kg                  | Concentration species absorbed to the solid         | Boundaries 1–12 | + operation |

| Name          | Expression    | Unit                    | Description                                         | Selection       | Details     |
|---------------|---------------|-------------------------|-----------------------------------------------------|-----------------|-------------|
| tds.KP_cOH    | 0             | m <sup>3</sup> /kg      | Adsorption isotherm, first concentration derivative | Domain 1        | + operation |
| tds.KP_cOH    | 0             | m <sup>3</sup> /kg      | Adsorption isotherm, first concentration derivative | Boundaries 1–12 | + operation |
| tds.R_cBEAD   | 0             | mol/(m <sup>3</sup> ·s) | Total rate expression                               | Domain 1        | + operation |
| tds.cP_cBEAD  | 0             | mol/kg                  | Concentration species absorbed to the solid         | Domain 1        | + operation |
| tds.cP_cBEAD  | 0             | mol/kg                  | Concentration species absorbed to the solid         | Boundaries 1–12 | + operation |
| tds.KP_cBEAD  | 0             | m <sup>3</sup> /kg      | Adsorption isotherm, first concentration derivative | Domain 1        | + operation |
| tds.KP_cBEAD  | 0             | m <sup>3</sup> /kg      | Adsorption isotherm, first concentration derivative | Boundaries 1–12 | + operation |
| tds.epsilon_p | 1             | 1                       | Porosity                                            | Domain 1        |             |
| tds.theta     | tds.epsilon_p | 1                       | Liquid volume fraction                              | Domain 1        |             |
| tds.av        | 0             | 1                       | Gas volume fraction                                 | Domain 1        |             |
| tds.nx        | dnx           | 1                       | Normal vector, x component                          | Boundaries 1–12 |             |
| tds.ny        | dny           | 1                       | Normal vector, y component                          | Boundaries 1–12 |             |
| tds.nz        | 0             | 1                       | Normal vector, z component                          | Boundaries 1–12 |             |
| tds.nxmesh    | dnxmesh       | 1                       | Normal vector (mesh), x                             | Boundaries 1–12 |             |

| Name          | Expression                                                  | Unit                    | Description                       | Selection       | Details |
|---------------|-------------------------------------------------------------|-------------------------|-----------------------------------|-----------------|---------|
|               |                                                             |                         | component                         |                 |         |
| tds.nymesh    | dnymesh                                                     | 1                       | Normal vector (mesh), y component | Boundaries 1–12 |         |
| tds.nzmesh    | 0                                                           | 1                       | Normal vector (mesh), z component | Boundaries 1–12 |         |
| tds.nxc       | root.nxc/tds.ncLen                                          | 1                       | Normal vector, x component        | Boundaries 1–12 |         |
| tds.nyc       | root.nyc/tds.ncLen                                          | 1                       | Normal vector, y component        | Boundaries 1–12 |         |
| tds.nzc       | 0                                                           | 1                       | Normal vector, z component        | Boundaries 1–12 |         |
| tds.ncLen     | $\sqrt{\text{root.nxc}^2 + \text{root.nyc}^2 + \text{eps}}$ | 1                       | Help variable                     | Boundaries 1–12 |         |
| tds.cbf_cK    | 0                                                           | mol/(m <sup>2</sup> ·s) | Convective boundary flux          | Boundaries 1–12 |         |
| tds.u         | 0                                                           | m/s                     | Velocity field, x component       | Domain 1        |         |
| tds.v         | 0                                                           | m/s                     | Velocity field, y component       | Domain 1        |         |
| tds.w         | 0                                                           | m/s                     | Velocity field, z component       | Domain 1        |         |
| tds.cbf_cCl   | 0                                                           | mol/(m <sup>2</sup> ·s) | Convective boundary flux          | Boundaries 1–12 |         |
| tds.cbf_cH3O  | 0                                                           | mol/(m <sup>2</sup> ·s) | Convective boundary flux          | Boundaries 1–12 |         |
| tds.cbf_cOH   | 0                                                           | mol/(m <sup>2</sup> ·s) | Convective boundary flux          | Boundaries 1–12 |         |
| tds.cbf_cBEAD | 0                                                           | mol/(m <sup>2</sup> ·s) | Convective boundary flux          | Boundaries 1–12 |         |

## 2.6.3 Transport Properties 1

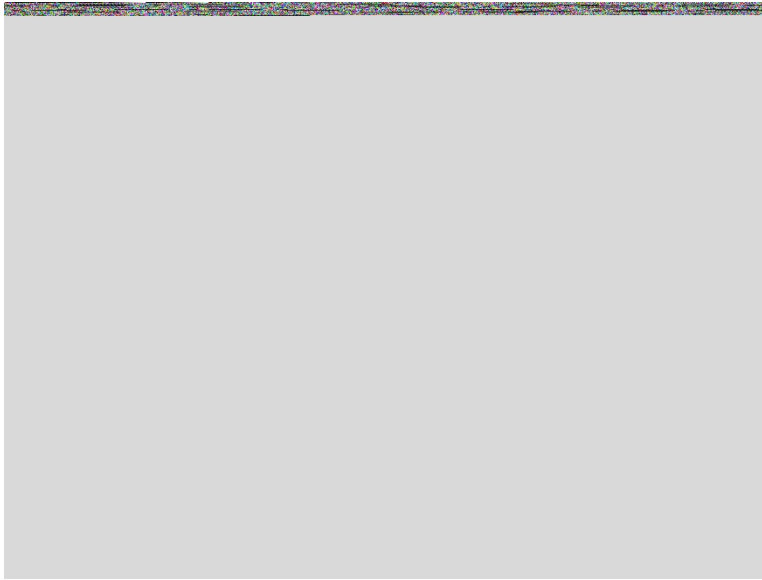

*Transport Properties 1*

### SELECTION

|                        |                                          |
|------------------------|------------------------------------------|
| Geometric entity level | Domain                                   |
| Selection              | Geometry geom1: Dimension 2: All domains |

### EQUATIONS

$$\nabla \cdot \mathbf{J}_i + \mathbf{u} \cdot \nabla C_i = R_i$$

$$\mathbf{J}_i = -D_i \nabla C_i - z_i \mu_{mj} F C_i \nabla V$$

### Convection

#### SETTINGS

| Description    | Value                |
|----------------|----------------------|
| Velocity field | Velocity field (spf) |

### Diffusion

#### SETTINGS

| Description           | Value                                   |
|-----------------------|-----------------------------------------|
| Material              | Water, liquid (mat1)                    |
| Diffusion coefficient | User defined                            |
| Diffusion coefficient | {{dK, 0, 0}, {0, dK, 0}, {0, 0, dK}}    |
| Diffusion coefficient | User defined                            |
| Diffusion coefficient | {{dCl, 0, 0}, {0, dCl, 0}, {0, 0, dCl}} |
| Diffusion coefficient | User defined                            |

| Description           | Value                                         |
|-----------------------|-----------------------------------------------|
| Diffusion coefficient | {{dH3O, 0, 0}, {0, dH3O, 0}, {0, 0, dH3O}}    |
| Diffusion coefficient | User defined                                  |
| Diffusion coefficient | {{dOH, 0, 0}, {0, dOH, 0}, {0, 0, dOH}}       |
| Diffusion coefficient | User defined                                  |
| Diffusion coefficient | {{dBEAD, 0, 0}, {0, dBEAD, 0}, {0, 0, dBEAD}} |

## Migration in electric field

### SETTINGS

| Description        | Value                      |
|--------------------|----------------------------|
| Electric potential | Electric potential (es)    |
| Mobility           | Nernst - Einstein relation |
| Charge number      | {1, -1, 1, -1, -1}         |

## Coordinate system selection

### SETTINGS

| Description       | Value                    |
|-------------------|--------------------------|
| Coordinate system | Global coordinate system |

## Model input

### SETTINGS

| Description | Value              |
|-------------|--------------------|
| Temperature | Common model input |

## Variables

| Name         | Expression                      | Unit                    | Description              | Selection | Details |
|--------------|---------------------------------|-------------------------|--------------------------|-----------|---------|
| domflux.cKx  | tds.dflux_cKx + tds.mflux_cKx   | mol/(m <sup>2</sup> .s) | Domain flux, x component | Domain 1  |         |
| domflux.cKy  | tds.dflux_cKy + tds.mflux_cKy   | mol/(m <sup>2</sup> .s) | Domain flux, y component | Domain 1  |         |
| domflux.cClx | tds.dflux_cClx + tds.mflux_cClx | mol/(m <sup>2</sup> .s) | Domain flux, x component | Domain 1  |         |
| domflux.cCly | tds.dflux_cCly + tds.mflux_cCly | mol/(m <sup>2</sup> .s) | Domain flux, y component | Domain 1  |         |

| Name           | Expression                                                                       | Unit                    | Description                 | Selection       | Details |
|----------------|----------------------------------------------------------------------------------|-------------------------|-----------------------------|-----------------|---------|
|                | ly                                                                               |                         |                             |                 |         |
| domflux.cH3Ox  | tds.dflux_cH3Ox+tds.mflux_cH3Ox                                                  | mol/(m <sup>2</sup> .s) | Domain flux, x component    | Domain 1        |         |
| domflux.cH3Oy  | tds.dflux_cH3Oy+tds.mflux_cH3Oy                                                  | mol/(m <sup>2</sup> .s) | Domain flux, y component    | Domain 1        |         |
| domflux.cOHx   | tds.dflux_cOHx+tds.mflux_cOHx                                                    | mol/(m <sup>2</sup> .s) | Domain flux, x component    | Domain 1        |         |
| domflux.cOHy   | tds.dflux_cOHy+tds.mflux_cOHy                                                    | mol/(m <sup>2</sup> .s) | Domain flux, y component    | Domain 1        |         |
| domflux.cBEADx | tds.dflux_cBEADx+tds.mflux_cBEADx                                                | mol/(m <sup>2</sup> .s) | Domain flux, x component    | Domain 1        |         |
| domflux.cBEADy | tds.dflux_cBEADy+tds.mflux_cBEADy                                                | mol/(m <sup>2</sup> .s) | Domain flux, y component    | Domain 1        |         |
| tds.ndflux_cK  | tds.dflux_cKx*tds.nxc+tds.dflux_cKy*tds.nyc+tds.dflux_cKz*tds.nzc                | mol/(m <sup>2</sup> .s) | Normal diffusive flux       | Boundaries 1–12 |         |
| tds.ncflux_cK  | tds.cflux_cKx*tds.nxc+tds.cflux_cKy*tds.nyc+tds.cflux_cKz*tds.nzc                | mol/(m <sup>2</sup> .s) | Normal convective flux      | Boundaries 1–12 |         |
| tds.nmflux_cK  | tds.mflux_cKx*tds.nxc+tds.mflux_cKy*tds.nyc+tds.mflux_cKz*tds.nzc                | mol/(m <sup>2</sup> .s) | Normal electrophoretic flux | Boundaries 1–12 |         |
| tds.ntflux_cK  | tds.bndFlux_cK+tds.cflux_cKx*tds.nxc+tds.cflux_cKy*tds.nyc+tds.cflux_cKz*tds.nzc | mol/(m <sup>2</sup> .s) | Normal total flux           | Boundaries 1–12 |         |
| tds.ndflux_cCl | tds.dflux_cClx*tds.nxc+tds.dflux_cCly*tds.nyc+tds.dflux_cClz*tds.nzc             | mol/(m <sup>2</sup> .s) | Normal diffusive flux       | Boundaries 1–12 |         |

| Name            | Expression                                                                                     | Unit                    | Description                 | Selection       | Details |
|-----------------|------------------------------------------------------------------------------------------------|-------------------------|-----------------------------|-----------------|---------|
|                 | $\_cClz*tds.nzc$                                                                               |                         |                             |                 |         |
| tds.ncflux_cCl  | $tds.cflux\_cClx*tds.nxc+tds.cflux\_cCly*tds.nyc+tds.cflux\_cClz*tds.nzc$                      | mol/(m <sup>2</sup> .s) | Normal convective flux      | Boundaries 1–12 |         |
| tds.nmflux_cCl  | $tds.mflux\_cClx*tds.nxc+tds.mflux\_cCly*tds.nyc+tds.mflux\_cClz*tds.nzc$                      | mol/(m <sup>2</sup> .s) | Normal electrophoretic flux | Boundaries 1–12 |         |
| tds.ntflux_cCl  | $tds.bndFlux\_cCl+tds.cflux\_cClx*tds.nxc+tds.cflux\_cCly*tds.nyc+tds.cflux\_cClz*tds.nzc$     | mol/(m <sup>2</sup> .s) | Normal total flux           | Boundaries 1–12 |         |
| tds.ndflux_cH3O | $tds.dflux\_cH3Ox*tds.nxc+tds.dflux\_cH3Oy*tds.nyc+tds.dflux\_cH3Oz*tds.nzc$                   | mol/(m <sup>2</sup> .s) | Normal diffusive flux       | Boundaries 1–12 |         |
| tds.ncflux_cH3O | $tds.cflux\_cH3Ox*tds.nxc+tds.cflux\_cH3Oy*tds.nyc+tds.cflux\_cH3Oz*tds.nzc$                   | mol/(m <sup>2</sup> .s) | Normal convective flux      | Boundaries 1–12 |         |
| tds.nmflux_cH3O | $tds.mflux\_cH3Ox*tds.nxc+tds.mflux\_cH3Oy*tds.nyc+tds.mflux\_cH3Oz*tds.nzc$                   | mol/(m <sup>2</sup> .s) | Normal electrophoretic flux | Boundaries 1–12 |         |
| tds.ntflux_cH3O | $tds.bndFlux\_cH3O+tds.cflux\_cH3Ox*tds.nxc+tds.cflux\_cH3Oy*tds.nyc+tds.cflux\_cH3Oz*tds.nzc$ | mol/(m <sup>2</sup> .s) | Normal total flux           | Boundaries 1–12 |         |
| tds.ndflux_cO   | $tds.dflux\_cOH$                                                                               | mol/(m                  | Normal                      | Boundaries      |         |



| Name             | Expression                                                                                                        | Unit                    | Description                 | Selection       | Details |
|------------------|-------------------------------------------------------------------------------------------------------------------|-------------------------|-----------------------------|-----------------|---------|
| H                | $x \cdot tds.nxc + tds.dflux\_cOH y + tds.nyc + tds.dflux\_cOH z + tds.nzc$                                       | $^2 \cdot s$ )          | diffusive flux              | s 1–12          |         |
| tds.ncflux_cOH   | $tds.cflux\_cOH x + tds.nxc + tds.cflux\_cOH y + tds.nyc + tds.cflux\_cOH z + tds.nzc$                            | mol/(m <sup>2</sup> ·s) | Normal convective flux      | Boundaries 1–12 |         |
| tds.nmflux_cOH   | $tds.mflux\_cOH x + tds.nxc + tds.mflux\_cOH y + tds.nyc + tds.mflux\_cOH z + tds.nzc$                            | mol/(m <sup>2</sup> ·s) | Normal electrophoretic flux | Boundaries 1–12 |         |
| tds.ntflux_cOH   | $tds.bndFlux\_cOH + tds.cflux\_cOH x + tds.nxc + tds.cflux\_cOH y + tds.nyc + tds.cflux\_cOH z + tds.nzc$         | mol/(m <sup>2</sup> ·s) | Normal total flux           | Boundaries 1–12 |         |
| tds.ndflux_cBEAD | $tds.dflux\_cBEAD x + tds.nxc + tds.dflux\_cBEAD y + tds.nyc + tds.dflux\_cBEAD z + tds.nzc$                      | mol/(m <sup>2</sup> ·s) | Normal diffusive flux       | Boundaries 1–12 |         |
| tds.ncflux_cBEAD | $tds.cflux\_cBEAD x + tds.nxc + tds.cflux\_cBEAD y + tds.nyc + tds.cflux\_cBEAD z + tds.nzc$                      | mol/(m <sup>2</sup> ·s) | Normal convective flux      | Boundaries 1–12 |         |
| tds.nmflux_cBEAD | $tds.mflux\_cBEAD x + tds.nxc + tds.mflux\_cBEAD y + tds.nyc + tds.mflux\_cBEAD z + tds.nzc$                      | mol/(m <sup>2</sup> ·s) | Normal electrophoretic flux | Boundaries 1–12 |         |
| tds.ntflux_cBEAD | $tds.bndFlux\_cBEAD + tds.cflux\_cBEAD x + tds.nxc + tds.cflux\_cBEAD y + tds.nyc + tds.cflux\_cBEAD z + tds.nzc$ | mol/(m <sup>2</sup> ·s) | Normal total flux           | Boundaries 1–12 |         |

| Name        | Expression                                              | Unit              | Description                         | Selection | Details     |
|-------------|---------------------------------------------------------|-------------------|-------------------------------------|-----------|-------------|
|             | s.nxc+tds.cflux_cBEADy*tds.nyc+tds.cflux_cBEADz*tds.nzc |                   |                                     |           |             |
| tds.u       | model.input.u1                                          | m/s               | Velocity field, x component         | Domain 1  | Meta        |
| tds.v       | model.input.u2                                          | m/s               | Velocity field, y component         | Domain 1  | Meta        |
| tds.w       | model.input.u3                                          | m/s               | Velocity field, z component         | Domain 1  | Meta        |
| tds.D_cKxx  | dK                                                      | m <sup>2</sup> /s | Diffusion coefficient, xx component | Domain 1  | + operation |
| tds.D_cKyx  | 0                                                       | m <sup>2</sup> /s | Diffusion coefficient, yx component | Domain 1  | + operation |
| tds.D_cKzx  | 0                                                       | m <sup>2</sup> /s | Diffusion coefficient, zx component | Domain 1  | + operation |
| tds.D_cKxy  | 0                                                       | m <sup>2</sup> /s | Diffusion coefficient, xy component | Domain 1  | + operation |
| tds.D_cKyy  | dK                                                      | m <sup>2</sup> /s | Diffusion coefficient, yy component | Domain 1  | + operation |
| tds.D_cKzy  | 0                                                       | m <sup>2</sup> /s | Diffusion coefficient, zy component | Domain 1  | + operation |
| tds.D_cKxz  | 0                                                       | m <sup>2</sup> /s | Diffusion coefficient, xz component | Domain 1  | + operation |
| tds.D_cKyz  | 0                                                       | m <sup>2</sup> /s | Diffusion coefficient, yz component | Domain 1  | + operation |
| tds.D_cKzz  | dK                                                      | m <sup>2</sup> /s | Diffusion coefficient, zz component | Domain 1  | + operation |
| tds.D_cClxx | dCl                                                     | m <sup>2</sup> /s | Diffusion coefficient, xx component | Domain 1  | + operation |
| tds.D_cClyx | 0                                                       | m <sup>2</sup> /s | Diffusion coefficient, yx component | Domain 1  | + operation |

| Name         | Expression | Unit              | Description                         | Selection | Details     |
|--------------|------------|-------------------|-------------------------------------|-----------|-------------|
|              |            |                   | component                           |           |             |
| tds.D_cClzx  | 0          | m <sup>2</sup> /s | Diffusion coefficient, zx component | Domain 1  | + operation |
| tds.D_cClxy  | 0          | m <sup>2</sup> /s | Diffusion coefficient, xy component | Domain 1  | + operation |
| tds.D_cClyy  | dCl        | m <sup>2</sup> /s | Diffusion coefficient, yy component | Domain 1  | + operation |
| tds.D_cClzy  | 0          | m <sup>2</sup> /s | Diffusion coefficient, zy component | Domain 1  | + operation |
| tds.D_cClxz  | 0          | m <sup>2</sup> /s | Diffusion coefficient, xz component | Domain 1  | + operation |
| tds.D_cClyz  | 0          | m <sup>2</sup> /s | Diffusion coefficient, yz component | Domain 1  | + operation |
| tds.D_cClzz  | dCl        | m <sup>2</sup> /s | Diffusion coefficient, zz component | Domain 1  | + operation |
| tds.D_cH3Oxx | dH3O       | m <sup>2</sup> /s | Diffusion coefficient, xx component | Domain 1  | + operation |
| tds.D_cH3Oyx | 0          | m <sup>2</sup> /s | Diffusion coefficient, yx component | Domain 1  | + operation |
| tds.D_cH3Ozx | 0          | m <sup>2</sup> /s | Diffusion coefficient, zx component | Domain 1  | + operation |
| tds.D_cH3Oxy | 0          | m <sup>2</sup> /s | Diffusion coefficient, xy component | Domain 1  | + operation |
| tds.D_cH3Oyy | dH3O       | m <sup>2</sup> /s | Diffusion coefficient, yy component | Domain 1  | + operation |
| tds.D_cH3Ozy | 0          | m <sup>2</sup> /s | Diffusion coefficient, zy component | Domain 1  | + operation |
| tds.D_cH3Oxz | 0          | m <sup>2</sup> /s | Diffusion coefficient, xz component | Domain 1  | + operation |

| Name                      | Expression | Unit              | Description                         | Selection | Details     |
|---------------------------|------------|-------------------|-------------------------------------|-----------|-------------|
| tds.D_cH3Oyz              | 0          | m <sup>2</sup> /s | Diffusion coefficient, yz component | Domain 1  | + operation |
| tds.D_cH3Ozz              | dH3O       | m <sup>2</sup> /s | Diffusion coefficient, zz component | Domain 1  | + operation |
| tds.D_cOHxx               | dOH        | m <sup>2</sup> /s | Diffusion coefficient, xx component | Domain 1  | + operation |
| tds.D_cOHyx               | 0          | m <sup>2</sup> /s | Diffusion coefficient, yx component | Domain 1  | + operation |
| tds.D_cOHzx               | 0          | m <sup>2</sup> /s | Diffusion coefficient, zx component | Domain 1  | + operation |
| tds.D_cOHxy               | 0          | m <sup>2</sup> /s | Diffusion coefficient, xy component | Domain 1  | + operation |
| tds.D_cOHyy               | dOH        | m <sup>2</sup> /s | Diffusion coefficient, yy component | Domain 1  | + operation |
| tds.D_cOHzy               | 0          | m <sup>2</sup> /s | Diffusion coefficient, zy component | Domain 1  | + operation |
| tds.D_cOHxz               | 0          | m <sup>2</sup> /s | Diffusion coefficient, xz component | Domain 1  | + operation |
| tds.D_cOHyz               | 0          | m <sup>2</sup> /s | Diffusion coefficient, yz component | Domain 1  | + operation |
| tds.D_cOHzz               | dOH        | m <sup>2</sup> /s | Diffusion coefficient, zz component | Domain 1  | + operation |
| tds.D_cBEADx <sub>x</sub> | dBEAD      | m <sup>2</sup> /s | Diffusion coefficient, xx component | Domain 1  | + operation |
| tds.D_cBEADy <sub>x</sub> | 0          | m <sup>2</sup> /s | Diffusion coefficient, yx component | Domain 1  | + operation |
| tds.D_cBEADz <sub>x</sub> | 0          | m <sup>2</sup> /s | Diffusion coefficient, zx component | Domain 1  | + operation |

| Name          | Expression                                | Unit                    | Description                         | Selection | Details     |
|---------------|-------------------------------------------|-------------------------|-------------------------------------|-----------|-------------|
| tds.D_cBEADxy | 0                                         | m <sup>2</sup> /s       | Diffusion coefficient, xy component | Domain 1  | + operation |
| tds.D_cBEADyy | dBEAD                                     | m <sup>2</sup> /s       | Diffusion coefficient, yy component | Domain 1  | + operation |
| tds.D_cBEADzy | 0                                         | m <sup>2</sup> /s       | Diffusion coefficient, zy component | Domain 1  | + operation |
| tds.D_cBEADxz | 0                                         | m <sup>2</sup> /s       | Diffusion coefficient, xz component | Domain 1  | + operation |
| tds.D_cBEADyz | 0                                         | m <sup>2</sup> /s       | Diffusion coefficient, yz component | Domain 1  | + operation |
| tds.D_cBEADzz | dBEAD                                     | m <sup>2</sup> /s       | Diffusion coefficient, zz component | Domain 1  | + operation |
| tds.Dav_cK    | 0.5*(tds.D_cKxx+tds.D_cKyy)               | m <sup>2</sup> /s       | Average diffusion coefficient       | Domain 1  |             |
| tds.Dav_cCl   | 0.5*(tds.D_cClxx+tds.D_cClxy)             | m <sup>2</sup> /s       | Average diffusion coefficient       | Domain 1  |             |
| tds.Dav_cH3O  | 0.5*(tds.D_cH3Oxx+tds.D_cH3Oyy)           | m <sup>2</sup> /s       | Average diffusion coefficient       | Domain 1  |             |
| tds.Dav_cOH   | 0.5*(tds.D_cOHxx+tds.D_cOHyy)             | m <sup>2</sup> /s       | Average diffusion coefficient       | Domain 1  |             |
| tds.Dav_cBEAD | 0.5*(tds.D_cBEADxx+tds.D_cBEADyy)         | m <sup>2</sup> /s       | Average diffusion coefficient       | Domain 1  |             |
| tds.tflux_cKx | tds.dflux_cKx+tds.mflux_cKx+tds.cflux_cKx | mol/(m <sup>2</sup> .s) | Total flux, x component             | Domain 1  | + operation |
| tds.tflux_cKy | tds.dflux_cKy+tds.mflux_cKy+tds.cflux_cKy | mol/(m <sup>2</sup> .s) | Total flux, y component             | Domain 1  | + operation |
| tds.tflux_cKz | tds.dflux_cKz+tds.mflux_cKz               | mol/(m <sup>2</sup> .s) | Total flux, z component             | Domain 1  | + operation |

| Name             | Expression                                                                                                                                                            | Unit                    | Description                       | Selection | Details     |
|------------------|-----------------------------------------------------------------------------------------------------------------------------------------------------------------------|-------------------------|-----------------------------------|-----------|-------------|
|                  | $z + \text{tds.cflux\_cKz}$                                                                                                                                           |                         |                                   |           |             |
| tds.dfluxMag_cK  | $\sqrt{\text{tds.dflux\_cKx}^2 + \text{tds.dflux\_cKy}^2 + \text{tds.dflux\_cKz}^2}$                                                                                  | mol/(m <sup>2</sup> .s) | Diffusive flux magnitude          | Domain 1  |             |
| tds.tfluxMag_cK  | $\sqrt{\text{tds.tflux\_cKx}^2 + \text{tds.tflux\_cKy}^2 + \text{tds.tflux\_cKz}^2}$                                                                                  | mol/(m <sup>2</sup> .s) | Total flux magnitude              | Domain 1  |             |
| tds.mflux_cKx    | $\text{tds.z\_cK} * \text{F\_const} * \text{cK} * (-\text{tds.um\_cKxx} * \text{d}(\text{tds.V}, \text{x}) - \text{tds.um\_cKxy} * \text{d}(\text{tds.V}, \text{y}))$ | mol/(m <sup>2</sup> .s) | Electrophoretic flux, x component | Domain 1  |             |
| tds.mflux_cKy    | $\text{tds.z\_cK} * \text{F\_const} * \text{cK} * (-\text{tds.um\_cKyx} * \text{d}(\text{tds.V}, \text{x}) - \text{tds.um\_cKyy} * \text{d}(\text{tds.V}, \text{y}))$ | mol/(m <sup>2</sup> .s) | Electrophoretic flux, y component | Domain 1  |             |
| tds.mflux_cKz    | $\text{tds.z\_cK} * \text{F\_const} * \text{cK} * (-\text{tds.um\_cKzx} * \text{d}(\text{tds.V}, \text{x}) - \text{tds.um\_cKzy} * \text{d}(\text{tds.V}, \text{y}))$ | mol/(m <sup>2</sup> .s) | Electrophoretic flux, z component | Domain 1  |             |
| tds.tflux_cClx   | $\text{tds.dflux\_cClx} + \text{tds.mflux\_cClx} + \text{tds.cflux\_cClx}$                                                                                            | mol/(m <sup>2</sup> .s) | Total flux, x component           | Domain 1  | + operation |
| tds.tflux_cCly   | $\text{tds.dflux\_cCly} + \text{tds.mflux\_cCly} + \text{tds.cflux\_cCly}$                                                                                            | mol/(m <sup>2</sup> .s) | Total flux, y component           | Domain 1  | + operation |
| tds.tflux_cClz   | $\text{tds.dflux\_cClz} + \text{tds.mflux\_cClz} + \text{tds.cflux\_cClz}$                                                                                            | mol/(m <sup>2</sup> .s) | Total flux, z component           | Domain 1  | + operation |
| tds.dfluxMag_cCl | $\sqrt{\text{tds.dflux\_cClx}^2 + \text{tds.dflux\_cCly}^2 + \text{tds.dflux\_cClz}^2}$                                                                               | mol/(m <sup>2</sup> .s) | Diffusive flux magnitude          | Domain 1  |             |

| Name              | Expression                                                                     | Unit                    | Description                       | Selection | Details     |
|-------------------|--------------------------------------------------------------------------------|-------------------------|-----------------------------------|-----------|-------------|
|                   | $ds.dflux\_cClz^2)$                                                            |                         |                                   |           |             |
| tds.tfluxMag_cCl  | $\sqrt{tds.tflux\_cClx^2+tds.tflux\_cCly^2+tds.tflux\_cClz^2}$                 | mol/(m <sup>2</sup> .s) | Total flux magnitude              | Domain 1  |             |
| tds.mflux_cClx    | $tds.z\_cCl*F\_const*cCl*(-tds.um\_cClxx*d(tds.V,x)-tds.um\_cClxy*d(tds.V,y))$ | mol/(m <sup>2</sup> .s) | Electrophoretic flux, x component | Domain 1  |             |
| tds.mflux_cCly    | $tds.z\_cCl*F\_const*cCl*(-tds.um\_cClyx*d(tds.V,x)-tds.um\_cClyy*d(tds.V,y))$ | mol/(m <sup>2</sup> .s) | Electrophoretic flux, y component | Domain 1  |             |
| tds.mflux_cClz    | $tds.z\_cCl*F\_const*cCl*(-tds.um\_cClzx*d(tds.V,x)-tds.um\_cClzy*d(tds.V,y))$ | mol/(m <sup>2</sup> .s) | Electrophoretic flux, z component | Domain 1  |             |
| tds.tflux_cH3Ox   | $tds.dflux\_cH3Ox+tds.mflux\_cH3Ox+tds.cflux\_cH3Ox$                           | mol/(m <sup>2</sup> .s) | Total flux, x component           | Domain 1  | + operation |
| tds.tflux_cH3Oy   | $tds.dflux\_cH3Oy+tds.mflux\_cH3Oy+tds.cflux\_cH3Oy$                           | mol/(m <sup>2</sup> .s) | Total flux, y component           | Domain 1  | + operation |
| tds.tflux_cH3Oz   | $tds.dflux\_cH3Oz+tds.mflux\_cH3Oz+tds.cflux\_cH3Oz$                           | mol/(m <sup>2</sup> .s) | Total flux, z component           | Domain 1  | + operation |
| tds.dfluxMag_cH3O | $\sqrt{tds.dflux\_cH3Ox^2+tds.dflux\_cH3Oy^2+tds.dflux\_cH3Oz^2}$              | mol/(m <sup>2</sup> .s) | Diffusive flux magnitude          | Domain 1  |             |
| tds.tfluxMag_cH3O | $\sqrt{tds.tflux\_cH3Ox^2+tds$                                                 | mol/(m <sup>2</sup> .s) | Total flux magnitude              | Domain 1  |             |

| Name             | Expression                                                                                            | Unit                    | Description                       | Selection | Details     |
|------------------|-------------------------------------------------------------------------------------------------------|-------------------------|-----------------------------------|-----------|-------------|
|                  | $.tflux\_cH3Oy^2 + tds.tflux\_cH3Oz^2)$                                                               |                         |                                   |           |             |
| tds.mflux_cH3Ox  | $tds.z\_cH3O * F\_const * cH3O * (- tds.um\_cH3O_{xx} * d(tds.V,x) - tds.um\_cH3O_{xy} * d(tds.V,y))$ | mol/(m <sup>2</sup> .s) | Electrophoretic flux, x component | Domain 1  |             |
| tds.mflux_cH3Oy  | $tds.z\_cH3O * F\_const * cH3O * (- tds.um\_cH3O_{yx} * d(tds.V,x) - tds.um\_cH3O_{yy} * d(tds.V,y))$ | mol/(m <sup>2</sup> .s) | Electrophoretic flux, y component | Domain 1  |             |
| tds.mflux_cH3Oz  | $tds.z\_cH3O * F\_const * cH3O * (- tds.um\_cH3O_{zx} * d(tds.V,x) - tds.um\_cH3O_{zy} * d(tds.V,y))$ | mol/(m <sup>2</sup> .s) | Electrophoretic flux, z component | Domain 1  |             |
| tds.tflux_cOHx   | $tds.dflux\_cOHx + tds.mflux\_cOHx + tds.cflux\_cOHx$                                                 | mol/(m <sup>2</sup> .s) | Total flux, x component           | Domain 1  | + operation |
| tds.tflux_cOHy   | $tds.dflux\_cOHy + tds.mflux\_cOHy + tds.cflux\_cOHy$                                                 | mol/(m <sup>2</sup> .s) | Total flux, y component           | Domain 1  | + operation |
| tds.tflux_cOHz   | $tds.dflux\_cOHz + tds.mflux\_cOHz + tds.cflux\_cOHz$                                                 | mol/(m <sup>2</sup> .s) | Total flux, z component           | Domain 1  | + operation |
| tds.dfluxMag_cOH | $\sqrt{tds.dflux\_cOHx^2 + tds.dflux\_cOHy^2 + tds.dflux\_cOHz^2}$                                    | mol/(m <sup>2</sup> .s) | Diffusive flux magnitude          | Domain 1  |             |
| tds.tfluxMag_cOH | $\sqrt{tds.tflux\_cOHx^2 + tds.tflux\_cOHy^2 + tds.tflux\_cOHz^2}$                                    | mol/(m <sup>2</sup> .s) | Total flux magnitude              | Domain 1  |             |



| Name               | Expression                                                                                   | Unit                    | Description                       | Selection | Details     |
|--------------------|----------------------------------------------------------------------------------------------|-------------------------|-----------------------------------|-----------|-------------|
|                    | Hz^2)                                                                                        |                         |                                   |           |             |
| tds.mflux_cOHx     | $tds.z\_cOH * F\_const * cOH * (-tds.um\_cOHx * d(tds.V,x) - tds.um\_cOHx * y * d(tds.V,y))$ | mol/(m <sup>2</sup> .s) | Electrophoretic flux, x component | Domain 1  |             |
| tds.mflux_cOHy     | $tds.z\_cOH * F\_const * cOH * (-tds.um\_cOHy * d(tds.V,x) - tds.um\_cOHy * y * d(tds.V,y))$ | mol/(m <sup>2</sup> .s) | Electrophoretic flux, y component | Domain 1  |             |
| tds.mflux_cOHz     | $tds.z\_cOH * F\_const * cOH * (-tds.um\_cOHx * d(tds.V,x) - tds.um\_cOHx * y * d(tds.V,y))$ | mol/(m <sup>2</sup> .s) | Electrophoretic flux, z component | Domain 1  |             |
| tds.tflux_cBEADx   | $tds.dflux\_cBEADx + tds.mflux\_cBEADx + tds.cflux\_cBEADx$                                  | mol/(m <sup>2</sup> .s) | Total flux, x component           | Domain 1  | + operation |
| tds.tflux_cBEADy   | $tds.dflux\_cBEADy + tds.mflux\_cBEADy + tds.cflux\_cBEADy$                                  | mol/(m <sup>2</sup> .s) | Total flux, y component           | Domain 1  | + operation |
| tds.tflux_cBEADz   | $tds.dflux\_cBEADz + tds.mflux\_cBEADz + tds.cflux\_cBEADz$                                  | mol/(m <sup>2</sup> .s) | Total flux, z component           | Domain 1  | + operation |
| tds.dfluxMag_cBEAD | $\sqrt{tds.dflux\_cBEADx^2 + tds.dflux\_cBEADy^2 + tds.dflux\_cBEADz^2}$                     | mol/(m <sup>2</sup> .s) | Diffusive flux magnitude          | Domain 1  |             |
| tds.tfluxMag_cBEAD | $\sqrt{tds.tflux\_cBEADx^2 + tds.tflux\_cBEADy^2 + tds.tflux\_cBEADz^2}$                     | mol/(m <sup>2</sup> .s) | Total flux magnitude              | Domain 1  |             |

| Name             | Expression                                                                                                       | Unit                    | Description                         | Selection | Details |
|------------------|------------------------------------------------------------------------------------------------------------------|-------------------------|-------------------------------------|-----------|---------|
| tds.mflux_cBEADx | tds.z_cBEAD*<br>F_const*cBEA<br>D*(-<br>tds.um_cBEA<br>Dxx*d(tds.V,x)<br>-<br>tds.um_cBEA<br>Dxy*d(tds.V,y)<br>) | mol/(m <sup>2</sup> .s) | Electrophoretic flux, x component   | Domain 1  |         |
| tds.mflux_cBEADy | tds.z_cBEAD*<br>F_const*cBEA<br>D*(-<br>tds.um_cBEA<br>Dyx*d(tds.V,x)<br>-<br>tds.um_cBEA<br>Dyy*d(tds.V,y)<br>) | mol/(m <sup>2</sup> .s) | Electrophoretic flux, y component   | Domain 1  |         |
| tds.mflux_cBEADz | tds.z_cBEAD*<br>F_const*cBEA<br>D*(-<br>tds.um_cBEA<br>Dzx*d(tds.V,x)<br>-<br>tds.um_cBEA<br>Dzy*d(tds.V,y)<br>) | mol/(m <sup>2</sup> .s) | Electrophoretic flux, z component   | Domain 1  |         |
| tds.dflux_cKx    | -<br>tds.D_cKxx*cK<br>x-<br>tds.D_cKxy*cK<br>y                                                                   | mol/(m <sup>2</sup> .s) | Diffusive flux, x component         | Domain 1  |         |
| tds.dflux_cKy    | -<br>tds.D_cKyx*cK<br>x-<br>tds.D_cKyy*cK<br>y                                                                   | mol/(m <sup>2</sup> .s) | Diffusive flux, y component         | Domain 1  |         |
| tds.dflux_cKz    | -<br>tds.D_cKzx*cK<br>x-<br>tds.D_cKzy*cK<br>y                                                                   | mol/(m <sup>2</sup> .s) | Diffusive flux, z component         | Domain 1  |         |
| tds.grad_cKx     | cKx                                                                                                              | mol/m <sup>4</sup>      | Concentration gradient, x component | Domain 1  |         |

| Name             | Expression                                         | Unit                    | Description                         | Selection | Details |
|------------------|----------------------------------------------------|-------------------------|-------------------------------------|-----------|---------|
| tds.grad_cKy     | cKy                                                | mol/m <sup>4</sup>      | Concentration gradient, y component | Domain 1  |         |
| tds.grad_cKz     | 0                                                  | mol/m <sup>4</sup>      | Concentration gradient, z component | Domain 1  |         |
| tds.dflux_cClx   | -<br>tds.D_cClxx*cClx-<br>tds.D_cClxy*cCly         | mol/(m <sup>2</sup> .s) | Diffusive flux, x component         | Domain 1  |         |
| tds.dflux_cCly   | -<br>tds.D_cClyx*cClx-<br>tds.D_cClyy*cCly         | mol/(m <sup>2</sup> .s) | Diffusive flux, y component         | Domain 1  |         |
| tds.dflux_cClz   | -<br>tds.D_cClzx*cClx-<br>tds.D_cClzy*cCly         | mol/(m <sup>2</sup> .s) | Diffusive flux, z component         | Domain 1  |         |
| tds.grad_cClx    | cClx                                               | mol/m <sup>4</sup>      | Concentration gradient, x component | Domain 1  |         |
| tds.grad_cCly    | cCly                                               | mol/m <sup>4</sup>      | Concentration gradient, y component | Domain 1  |         |
| tds.grad_cClz    | 0                                                  | mol/m <sup>4</sup>      | Concentration gradient, z component | Domain 1  |         |
| tds.dflux_cCH3Ox | -<br>tds.D_cCH3Oxx*cCH3Ox-<br>tds.D_cCH3Oxy*cCH3Oy | mol/(m <sup>2</sup> .s) | Diffusive flux, x component         | Domain 1  |         |
| tds.dflux_cCH3Oy | -<br>tds.D_cCH3Oyx*cCH3Ox-<br>tds.D_cCH3Oyy*cCH3Oy | mol/(m <sup>2</sup> .s) | Diffusive flux, y component         | Domain 1  |         |
| tds.dflux_cCH3Oz | -<br>tds.D_cCH3Ozx*cCH3Ox-<br>tds.D_cCH3Ozy*cCH3Oy | mol/(m <sup>2</sup> .s) | Diffusive flux, z component         | Domain 1  |         |

| Name             | Expression                                              | Unit                    | Description                         | Selection | Details |
|------------------|---------------------------------------------------------|-------------------------|-------------------------------------|-----------|---------|
|                  | *cH3Oy                                                  |                         |                                     |           |         |
| tds.grad_cH3Ox   | cH3Ox                                                   | mol/m <sup>4</sup>      | Concentration gradient, x component | Domain 1  |         |
| tds.grad_cH3Oy   | cH3Oy                                                   | mol/m <sup>4</sup>      | Concentration gradient, y component | Domain 1  |         |
| tds.grad_cH3Oz   | 0                                                       | mol/m <sup>4</sup>      | Concentration gradient, z component | Domain 1  |         |
| tds.dflux_cOHx   | - tds.D_cOHxx*<br>cOHx-<br>tds.D_cOHxy*<br>cOHy         | mol/(m <sup>2</sup> .s) | Diffusive flux, x component         | Domain 1  |         |
| tds.dflux_cOHy   | - tds.D_cOHyx*<br>cOHx-<br>tds.D_cOHyy*<br>cOHy         | mol/(m <sup>2</sup> .s) | Diffusive flux, y component         | Domain 1  |         |
| tds.dflux_cOHz   | - tds.D_cOHzx*<br>cOHx-<br>tds.D_cOHzy*<br>cOHy         | mol/(m <sup>2</sup> .s) | Diffusive flux, z component         | Domain 1  |         |
| tds.grad_cOHx    | cOHx                                                    | mol/m <sup>4</sup>      | Concentration gradient, x component | Domain 1  |         |
| tds.grad_cOHy    | cOHy                                                    | mol/m <sup>4</sup>      | Concentration gradient, y component | Domain 1  |         |
| tds.grad_cOHz    | 0                                                       | mol/m <sup>4</sup>      | Concentration gradient, z component | Domain 1  |         |
| tds.dflux_cBEADx | - tds.D_cBEADx<br>x*cBEADx-<br>tds.D_cBEADx<br>y*cBEADy | mol/(m <sup>2</sup> .s) | Diffusive flux, x component         | Domain 1  |         |
| tds.dflux_cBEADy | - tds.D_cBEADy<br>x*cBEADx-<br>tds.D_cBEADy<br>y*cBEADy | mol/(m <sup>2</sup> .s) | Diffusive flux, y component         | Domain 1  |         |

| Name             | Expression                                                                 | Unit                    | Description                         | Selection | Details |
|------------------|----------------------------------------------------------------------------|-------------------------|-------------------------------------|-----------|---------|
| tds.dflux_cBEADz | $-\text{tds.D\_cBEADz}x*\text{cBEADx}-\text{tds.D\_cBEADz}y*\text{cBEADy}$ | mol/(m <sup>2</sup> .s) | Diffusive flux, z component         | Domain 1  |         |
| tds.grad_cBEADx  | cBEADx                                                                     | mol/m <sup>4</sup>      | Concentration gradient, x component | Domain 1  |         |
| tds.grad_cBEADy  | cBEADy                                                                     | mol/m <sup>4</sup>      | Concentration gradient, y component | Domain 1  |         |
| tds.grad_cBEADz  | 0                                                                          | mol/m <sup>4</sup>      | Concentration gradient, z component | Domain 1  |         |
| tds.um_cKxx      | $\text{tds.D\_cKxx}/(\text{R\_const}*\text{tds.T})$                        | s-mol/kg                | Mobility, xx component              | Domain 1  |         |
| tds.um_cKyx      | $\text{tds.D\_cKyx}/(\text{R\_const}*\text{tds.T})$                        | s-mol/kg                | Mobility, yx component              | Domain 1  |         |
| tds.um_cKzx      | $\text{tds.D\_cKzx}/(\text{R\_const}*\text{tds.T})$                        | s-mol/kg                | Mobility, zx component              | Domain 1  |         |
| tds.um_cKxy      | $\text{tds.D\_cKxy}/(\text{R\_const}*\text{tds.T})$                        | s-mol/kg                | Mobility, xy component              | Domain 1  |         |
| tds.um_cKyy      | $\text{tds.D\_cKyy}/(\text{R\_const}*\text{tds.T})$                        | s-mol/kg                | Mobility, yy component              | Domain 1  |         |
| tds.um_cKzy      | $\text{tds.D\_cKzy}/(\text{R\_const}*\text{tds.T})$                        | s-mol/kg                | Mobility, zy component              | Domain 1  |         |
| tds.um_cKxz      | $\text{tds.D\_cKxz}/(\text{R\_const}*\text{tds.T})$                        | s-mol/kg                | Mobility, xz component              | Domain 1  |         |
| tds.um_cKyz      | $\text{tds.D\_cKyz}/(\text{R\_const}*\text{tds.T})$                        | s-mol/kg                | Mobility, yz component              | Domain 1  |         |
| tds.um_cKzz      | $\text{tds.D\_cKzz}/(\text{R\_const}*\text{tds.T})$                        | s-mol/kg                | Mobility, zz component              | Domain 1  |         |
| tds.z_cK         | 1                                                                          | 1                       | Charge number                       | Domain 1  |         |
| tds.um_cClxx     | $\text{tds.D\_cClxx}/(\text{R\_const}*\text{tds.T})$                       | s-mol/kg                | Mobility, xx component              | Domain 1  |         |
| tds.um_cClyx     | $\text{tds.D\_cClyx}/(\text{R\_const}*\text{tds.T})$                       | s-mol/kg                | Mobility, yx component              | Domain 1  |         |
| tds.um_cClzx     | $\text{tds.D\_cClzx}/(\text{R\_const}*\text{tds.T})$                       | s-mol/kg                | Mobility, zx component              | Domain 1  |         |
| tds.um_cClxy     | $\text{tds.D\_cClxy}/(\text{R\_const}*\text{tds.T})$                       | s-mol/kg                | Mobility, xy component              | Domain 1  |         |

| Name          | Expression                   | Unit          | Description            | Selection | Details |
|---------------|------------------------------|---------------|------------------------|-----------|---------|
|               | R_const*tds.T)               | g             | component              |           |         |
| tds.um_cClyy  | tds.D_cClyy/(R_const*tds.T)  | s-mol/kg<br>g | Mobility, yy component | Domain 1  |         |
| tds.um_cClzy  | tds.D_cClzy/(R_const*tds.T)  | s-mol/kg<br>g | Mobility, zy component | Domain 1  |         |
| tds.um_cClxz  | tds.D_cClxz/(R_const*tds.T)  | s-mol/kg<br>g | Mobility, xz component | Domain 1  |         |
| tds.um_cClyz  | tds.D_cClyz/(R_const*tds.T)  | s-mol/kg<br>g | Mobility, yz component | Domain 1  |         |
| tds.um_cClzz  | tds.D_cClzz/(R_const*tds.T)  | s-mol/kg<br>g | Mobility, zz component | Domain 1  |         |
| tds.z_cCl     | -1                           | 1             | Charge number          | Domain 1  |         |
| tds.um_cH3Oxx | tds.D_cH3Oxx/(R_const*tds.T) | s-mol/kg<br>g | Mobility, xx component | Domain 1  |         |
| tds.um_cH3Oyx | tds.D_cH3Oyx/(R_const*tds.T) | s-mol/kg<br>g | Mobility, yx component | Domain 1  |         |
| tds.um_cH3Ozx | tds.D_cH3Ozx/(R_const*tds.T) | s-mol/kg<br>g | Mobility, zx component | Domain 1  |         |
| tds.um_cH3Oxy | tds.D_cH3Oxy/(R_const*tds.T) | s-mol/kg<br>g | Mobility, xy component | Domain 1  |         |
| tds.um_cH3Oyy | tds.D_cH3Oyy/(R_const*tds.T) | s-mol/kg<br>g | Mobility, yy component | Domain 1  |         |
| tds.um_cH3Ozy | tds.D_cH3Ozy/(R_const*tds.T) | s-mol/kg<br>g | Mobility, zy component | Domain 1  |         |
| tds.um_cH3Oxz | tds.D_cH3Oxz/(R_const*tds.T) | s-mol/kg<br>g | Mobility, xz component | Domain 1  |         |
| tds.um_cH3Oyz | tds.D_cH3Oyz/(R_const*tds.T) | s-mol/kg<br>g | Mobility, yz component | Domain 1  |         |
| tds.um_cH3Ozz | tds.D_cH3Ozz/(R_const*tds.T) | s-mol/kg<br>g | Mobility, zz component | Domain 1  |         |
| tds.z_cH3O    | 1                            | 1             | Charge number          | Domain 1  |         |

| Name               | Expression                               | Unit     | Description            | Selection | Details |
|--------------------|------------------------------------------|----------|------------------------|-----------|---------|
| tds.um_cOHx<br>x   | $\frac{tds.D\_cOHxx}{(R\_const*tds.T)}$  | s-mol/kg | Mobility, xx component | Domain 1  |         |
| tds.um_cOHy<br>x   | $\frac{tds.D\_cOHyx}{(R\_const*tds.T)}$  | s-mol/kg | Mobility, yx component | Domain 1  |         |
| tds.um_cOHz<br>x   | $\frac{tds.D\_cOHzx}{(R\_const*tds.T)}$  | s-mol/kg | Mobility, zx component | Domain 1  |         |
| tds.um_cOHx<br>y   | $\frac{tds.D\_cOHxy}{(R\_const*tds.T)}$  | s-mol/kg | Mobility, xy component | Domain 1  |         |
| tds.um_cOHy<br>y   | $\frac{tds.D\_cOHyy}{(R\_const*tds.T)}$  | s-mol/kg | Mobility, yy component | Domain 1  |         |
| tds.um_cOHz<br>y   | $\frac{tds.D\_cOHzy}{(R\_const*tds.T)}$  | s-mol/kg | Mobility, zy component | Domain 1  |         |
| tds.um_cOHx<br>z   | $\frac{tds.D\_cOHxz}{(R\_const*tds.T)}$  | s-mol/kg | Mobility, xz component | Domain 1  |         |
| tds.um_cOHy<br>z   | $\frac{tds.D\_cOHyz}{(R\_const*tds.T)}$  | s-mol/kg | Mobility, yz component | Domain 1  |         |
| tds.um_cOHz<br>z   | $\frac{tds.D\_cOHzz}{(R\_const*tds.T)}$  | s-mol/kg | Mobility, zz component | Domain 1  |         |
| tds.z_cOH          | -1                                       | 1        | Charge number          | Domain 1  |         |
| tds.um_cBEA<br>Dxx | $\frac{tds.D\_cBEADx}{(R\_const*tds.T)}$ | s-mol/kg | Mobility, xx component | Domain 1  |         |
| tds.um_cBEA<br>Dyx | $\frac{tds.D\_cBEADy}{(R\_const*tds.T)}$ | s-mol/kg | Mobility, yx component | Domain 1  |         |
| tds.um_cBEA<br>Dzx | $\frac{tds.D\_cBEADz}{(R\_const*tds.T)}$ | s-mol/kg | Mobility, zx component | Domain 1  |         |
| tds.um_cBEA<br>Dxy | $\frac{tds.D\_cBEADx}{(R\_const*tds.T)}$ | s-mol/kg | Mobility, xy component | Domain 1  |         |
| tds.um_cBEA<br>Dyy | $\frac{tds.D\_cBEADy}{(R\_const*tds.T)}$ | s-mol/kg | Mobility, yy component | Domain 1  |         |
| tds.um_cBEA        | $\frac{tds.D\_cBEADz}{(R\_const*tds.T)}$ | s-mol/kg | Mobility, zy component | Domain 1  |         |

| Name             | Expression                                                         | Unit                    | Description                  | Selection | Details |
|------------------|--------------------------------------------------------------------|-------------------------|------------------------------|-----------|---------|
| Dzy              | $y/(R\_const \cdot tds.T)$                                         | g                       | component                    |           |         |
| tds.um_cBEADxz   | $tds.D\_cBEADxz/(R\_const \cdot tds.T)$                            | s-mol/kg                | Mobility, xz component       | Domain 1  |         |
| tds.um_cBEADyz   | $tds.D\_cBEADyz/(R\_const \cdot tds.T)$                            | s-mol/kg                | Mobility, yz component       | Domain 1  |         |
| tds.um_cBEADzz   | $tds.D\_cBEADzz/(R\_const \cdot tds.T)$                            | s-mol/kg                | Mobility, zz component       | Domain 1  |         |
| tds.z_cBEAD      | -1                                                                 | 1                       | Charge number                | Domain 1  |         |
| tds.V            | model.input.V                                                      | V                       | Electric potential           | Domain 1  | Meta    |
| tds.T            | tds.cdm1.min<br>put_temperature                                    | K                       | Temperature                  | Domain 1  |         |
| tds.cflux_cKx    | $cK \cdot tds.u$                                                   | mol/(m <sup>2</sup> .s) | Convective flux, x component | Domain 1  |         |
| tds.cflux_cKy    | $cK \cdot tds.v$                                                   | mol/(m <sup>2</sup> .s) | Convective flux, y component | Domain 1  |         |
| tds.cflux_cKz    | $cK \cdot tds.w$                                                   | mol/(m <sup>2</sup> .s) | Convective flux, z component | Domain 1  |         |
| tds.cfluxMag_cK  | $\sqrt{tds.cflux\_cKx^2 + tds.cflux\_cKy^2 + tds.cflux\_cKz^2}$    | mol/(m <sup>2</sup> .s) | Convective flux magnitude    | Domain 1  |         |
| tds.cflux_cClx   | $cCl \cdot tds.u$                                                  | mol/(m <sup>2</sup> .s) | Convective flux, x component | Domain 1  |         |
| tds.cflux_cCly   | $cCl \cdot tds.v$                                                  | mol/(m <sup>2</sup> .s) | Convective flux, y component | Domain 1  |         |
| tds.cflux_cClz   | $cCl \cdot tds.w$                                                  | mol/(m <sup>2</sup> .s) | Convective flux, z component | Domain 1  |         |
| tds.cfluxMag_cCl | $\sqrt{tds.cflux\_cClx^2 + tds.cflux\_cCly^2 + tds.cflux\_cClz^2}$ | mol/(m <sup>2</sup> .s) | Convective flux magnitude    | Domain 1  |         |



| Name               | Expression                                                           | Unit          | Description                  | Selection | Details |
|--------------------|----------------------------------------------------------------------|---------------|------------------------------|-----------|---------|
|                    | $ds.cflux\_cClz^2)$                                                  |               |                              |           |         |
| tds.cflux_cH3Ox    | $cH3O*tds.u$                                                         | $mol/(m^2.s)$ | Convective flux, x component | Domain 1  |         |
| tds.cflux_cH3Oy    | $cH3O*tds.v$                                                         | $mol/(m^2.s)$ | Convective flux, y component | Domain 1  |         |
| tds.cflux_cH3Oz    | $cH3O*tds.w$                                                         | $mol/(m^2.s)$ | Convective flux, z component | Domain 1  |         |
| tds.cfluxMag_cH3O  | $\sqrt{tds.cflux\_cH3Ox^2+tds.cflux\_cH3Oy^2+tds.cflux\_cH3Oz^2}$    | $mol/(m^2.s)$ | Convective flux magnitude    | Domain 1  |         |
| tds.cflux_cOHx     | $cOH*tds.u$                                                          | $mol/(m^2.s)$ | Convective flux, x component | Domain 1  |         |
| tds.cflux_cOHy     | $cOH*tds.v$                                                          | $mol/(m^2.s)$ | Convective flux, y component | Domain 1  |         |
| tds.cflux_cOHz     | $cOH*tds.w$                                                          | $mol/(m^2.s)$ | Convective flux, z component | Domain 1  |         |
| tds.cfluxMag_cOH   | $\sqrt{tds.cflux\_cOHx^2+tds.cflux\_cOHy^2+tds.cflux\_cOHz^2}$       | $mol/(m^2.s)$ | Convective flux magnitude    | Domain 1  |         |
| tds.cflux_cBEADx   | $cBEAD*tds.u$                                                        | $mol/(m^2.s)$ | Convective flux, x component | Domain 1  |         |
| tds.cflux_cBEADy   | $cBEAD*tds.v$                                                        | $mol/(m^2.s)$ | Convective flux, y component | Domain 1  |         |
| tds.cflux_cBEADz   | $cBEAD*tds.w$                                                        | $mol/(m^2.s)$ | Convective flux, z component | Domain 1  |         |
| tds.cfluxMag_cBEAD | $\sqrt{tds.cflux\_cBEADx^2+tds.cflux\_cBEADy^2+tds.cflux\_cBEADz^2}$ | $mol/(m^2.s)$ | Convective flux magnitude    | Domain 1  |         |

| Name              | Expression                                                                                                                                                                                                                                        | Unit                    | Description       | Selection       | Details |
|-------------------|---------------------------------------------------------------------------------------------------------------------------------------------------------------------------------------------------------------------------------------------------|-------------------------|-------------------|-----------------|---------|
|                   | -_cBEADz^2)                                                                                                                                                                                                                                       |                         |                   |                 |         |
| tds.bndFlux_cK    | -dflux_spatial(cK)                                                                                                                                                                                                                                | mol/(m <sup>2</sup> .s) | Boundary flux     | Boundaries 1–12 |         |
| tds.bndFlux_cCl   | -dflux_spatial(cCl)                                                                                                                                                                                                                               | mol/(m <sup>2</sup> .s) | Boundary flux     | Boundaries 1–12 |         |
| tds.bndFlux_cH3O  | -dflux_spatial(cH3O)                                                                                                                                                                                                                              | mol/(m <sup>2</sup> .s) | Boundary flux     | Boundaries 1–12 |         |
| tds.bndFlux_cOH   | -dflux_spatial(cOH)                                                                                                                                                                                                                               | mol/(m <sup>2</sup> .s) | Boundary flux     | Boundaries 1–12 |         |
| tds.bndFlux_cBEAD | -dflux_spatial(cBEAD)                                                                                                                                                                                                                             | mol/(m <sup>2</sup> .s) | Boundary flux     | Boundaries 1–12 |         |
| tds.Res_cK        | -tds.D_cKxx*cKxx-tds.D_cKxy*cKxy-tds.D_cKyx*cKyx-tds.D_cKyy*cKyy+d(cK*tds.z_cK*F_const*(-tds.um_cKxx*d(tds.V,x)-tds.um_cKxy*d(tds.V,y)),x)+d(cK*tds.z_cK*F_const*(-tds.um_cKyx*d(tds.V,x)-tds.um_cKyy*d(tds.V,y)),y)+tds.u*cKx+tds.v*cKy-tds.R_cK | mol/(m <sup>3</sup> .s) | Equation residual | Domain 1        |         |
| tds.Res_cCl       | -tds.D_cClxx*cClxx-tds.D_cClxy*cClxy-                                                                                                                                                                                                             | mol/(m <sup>3</sup> .s) | Equation residual | Domain 1        |         |

| Name         | Expression                                                                                                                                                                                                                                                                                                                                                                                                                                                                                                                                                                                                                                                                                                                               | Unit                    | Description       | Selection | Details |
|--------------|------------------------------------------------------------------------------------------------------------------------------------------------------------------------------------------------------------------------------------------------------------------------------------------------------------------------------------------------------------------------------------------------------------------------------------------------------------------------------------------------------------------------------------------------------------------------------------------------------------------------------------------------------------------------------------------------------------------------------------------|-------------------------|-------------------|-----------|---------|
|              | $\begin{aligned} & \text{tds.D\_cClyx} * c \\ & \text{Clyx} - \\ & \text{tds.D\_cClyy} * c \\ & \text{Clyy} + d(cCl * tds \\ & \text{s.z\_cCl} * F\_const * (- \\ & \text{tds.um\_cClxx} * \\ & d(\text{tds.V}, x) - \\ & \text{tds.um\_cClxy} * \\ & d(\text{tds.V}, y)), x) + \\ & d(cCl * \text{tds.z\_cCl} \\ & * F\_const * (- \\ & \text{tds.um\_cClyx} * \\ & d(\text{tds.V}, x) - \\ & \text{tds.um\_cClyy} * \\ & d(\text{tds.V}, y)), y) + \\ & \text{tds.u} * cClx + \text{tds.v} * cCly - \\ & \text{tds.R\_cCl} \end{aligned}$                                                                                                                                                                                              |                         |                   |           |         |
| tds.Res_cH3O | $\begin{aligned} & - \\ & \text{tds.D\_cH3Oxx} \\ & * cH3Oxx - \\ & \text{tds.D\_cH3Oxy} \\ & * cH3Oxy - \\ & \text{tds.D\_cH3Oyx} \\ & * cH3Oyx - \\ & \text{tds.D\_cH3Oyy} \\ & * cH3Oyy + d(c \\ & \text{H3O} * \text{tds.z\_cH} \\ & \text{3O} * F\_const * (- \\ & \text{tds.um\_cH3O} \\ & \text{xx} * d(\text{tds.V}, x) - \\ & \text{tds.um\_cH3O} \\ & \text{xy} * d(\text{tds.V}, y)), \\ & x) + d(cH3O * \text{tds} \\ & \text{s.z\_cH3O} * F\_c \\ & \text{onst} * (- \\ & \text{tds.um\_cH3O} \\ & \text{yx} * d(\text{tds.V}, x) - \\ & \text{tds.um\_cH3O} \\ & \text{yy} * d(\text{tds.V}, y)), \\ & y) + \text{tds.u} * cH3 \\ & \text{Ox} + \text{tds.v} * cH3 \\ & \text{Oy} - \\ & \text{tds.R\_cH3O} \end{aligned}$ | mol/(m <sup>3</sup> .s) | Equation residual | Domain 1  |         |
| tds.Res_cOH  | $- \text{tds.D\_cOHxx} *$                                                                                                                                                                                                                                                                                                                                                                                                                                                                                                                                                                                                                                                                                                                | mol/(m <sup>3</sup> .s) | Equation residual | Domain 1  |         |

| Name          | Expression                                                                                                                                                                                                                                                                                                                                                                                                                                                                                           | Unit                    | Description       | Selection | Details |
|---------------|------------------------------------------------------------------------------------------------------------------------------------------------------------------------------------------------------------------------------------------------------------------------------------------------------------------------------------------------------------------------------------------------------------------------------------------------------------------------------------------------------|-------------------------|-------------------|-----------|---------|
|               | $ \begin{aligned} & cOH_{xx} - tds.D\_cOH_{xy} * \\ & cOH_{xy} - tds.D\_cOH_{yx} * \\ & cOH_{yx} - tds.D\_cOH_{yy} * \\ & cOH_{yy} + d(cO \\ & H * tds.z\_cOH * \\ & F\_const * (- \\ & tds.um\_cOHx \\ & x * d(tds.V, x) - \\ & tds.um\_cOHx \\ & y * d(tds.V, y)), x \\ & ) + d(cOH * tds. \\ & z\_cOH * F\_cons \\ & t * (- \\ & tds.um\_cOHy \\ & x * d(tds.V, x) - \\ & tds.um\_cOHy \\ & y * d(tds.V, y)), y \\ & ) + tds.u * cOHx \\ & + tds.v * cOHy - \\ & tds.R\_cOH \end{aligned} $       |                         |                   |           |         |
| tds.Res_cBEAD | $ \begin{aligned} & - \\ & tds.D\_cBEADx \\ & x * cBEAD_{xx} - \\ & tds.D\_cBEADx \\ & y * cBEAD_{xy} - \\ & tds.D\_cBEADy \\ & x * cBEAD_{yx} - \\ & tds.D\_cBEADy \\ & y * cBEAD_{yy} + d \\ & (cBEAD * tds.z\_ \\ & cBEAD * F\_con \\ & st * (- \\ & tds.um\_cBEA \\ & D_{xx} * d(tds.V, x) \\ & - \\ & tds.um\_cBEA \\ & D_{xy} * d(tds.V, y) \\ & ), x) + d(cBEAD * \\ & tds.z\_cBEAD * \\ & F\_const * (- \\ & tds.um\_cBEA \\ & D_{yx} * d(tds.V, x) \\ & - \\ & tds.um\_cBEA \end{aligned} $ | mol/(m <sup>3</sup> .s) | Equation residual | Domain 1  |         |

| Name | Expression                                                                                        | Unit | Description | Selection | Details |
|------|---------------------------------------------------------------------------------------------------|------|-------------|-----------|---------|
|      | $D_{yy} \frac{d}{dt} (c_{Kx}, y) + tds.u \cdot c_{BEADx} + tds.v \cdot c_{BEADy} - tds.R_{cBEAD}$ |      |             |           |         |

### Shape functions

| Name  | Shape function       | Unit               | Description   | Shape frame | Selection |
|-------|----------------------|--------------------|---------------|-------------|-----------|
| cK    | Lagrange (Quadratic) | mol/m <sup>3</sup> | Concentration | Spatial     | Domain 1  |
| cCl   | Lagrange (Quadratic) | mol/m <sup>3</sup> | Concentration | Spatial     | Domain 1  |
| cH3O  | Lagrange (Quadratic) | mol/m <sup>3</sup> | Concentration | Spatial     | Domain 1  |
| cOH   | Lagrange (Quadratic) | mol/m <sup>3</sup> | Concentration | Spatial     | Domain 1  |
| cBEAD | Lagrange (Quadratic) | mol/m <sup>3</sup> | Concentration | Spatial     | Domain 1  |

### Weak expressions

| Weak expression                                                                                                                                                                                           | Integration order | Integration frame | Selection |
|-----------------------------------------------------------------------------------------------------------------------------------------------------------------------------------------------------------|-------------------|-------------------|-----------|
| $tds.dflux_{cKx} \cdot test(cKx) + tds.dflux_{cKy} \cdot test(cKy)$                                                                                                                                       | 4                 | Spatial           | Domain 1  |
| $tds.dflux_{cClx} \cdot test(cClx) + tds.dflux_{cCly} \cdot test(cCly)$                                                                                                                                   | 4                 | Spatial           | Domain 1  |
| $tds.dflux_{cH3Ox} \cdot test(cH3Ox) + tds.dflux_{cH3Oy} \cdot test(cH3Oy)$                                                                                                                               | 4                 | Spatial           | Domain 1  |
| $tds.dflux_{cOHx} \cdot test(cOHx) + tds.dflux_{cOHy} \cdot test(cOHy)$                                                                                                                                   | 4                 | Spatial           | Domain 1  |
| $tds.dflux_{cBEADx} \cdot test(cBEADx) + tds.dflux_{cBEADy} \cdot test(cBEADy)$                                                                                                                           | 4                 | Spatial           | Domain 1  |
| $tds.z_{cK} \cdot F_{const} \cdot cK \cdot ((-tds.um_{cKxx} \cdot d(tds.V, x) - tds.um_{cKxy} \cdot d(tds.V, y)) \cdot test(cKx) + (-tds.um_{cKyx} \cdot d(tds.V, x) - tds.um_{cKyy} \cdot d(tds.V, y)))$ | 4                 | Spatial           | Domain 1  |

| Weak expression                                                                                                                                                                                         | Integration order | Integration frame | Selection     |
|---------------------------------------------------------------------------------------------------------------------------------------------------------------------------------------------------------|-------------------|-------------------|---------------|
| *test(cKy))                                                                                                                                                                                             |                   |                   |               |
| tds.z_cCl*F_const*cCl*((<br>-<br>tds.um_cClxx*d(tds.V,x)-<br>tds.um_cClxy*d(tds.V,y))<br>*test(cClx)+(-<br>tds.um_cClyx*d(tds.V,x)-<br>tds.um_cClyy*d(tds.V,y))<br>*test(cCly))                         | 4                 | Spatial           | Domain 1      |
| tds.z_cH3O*F_const*cH<br>3O*((-<br>tds.um_cH3Oxx*d(tds.V,<br>x)-<br>tds.um_cH3Oxy*d(tds.V,<br>y))*test(cH3Ox)+(-<br>tds.um_cH3Oyx*d(tds.V,<br>x)-<br>tds.um_cH3Oyy*d(tds.V,<br>y))*test(cH3Oy))         | 4                 | Spatial           | Domain 1      |
| tds.z_cOH*F_const*cOH<br>*((-<br>tds.um_cOHxx*d(tds.V,x<br>)-<br>tds.um_cOHxy*d(tds.V,y<br>))*test(cOHx)+(-<br>tds.um_cOHyx*d(tds.V,x<br>)-<br>tds.um_cOHyy*d(tds.V,y<br>))*test(cOHy))                 | 4                 | Spatial           | Domain 1      |
| tds.z_cBEAD*F_const*cB<br>EAD*((-<br>tds.um_cBEADxx*d(tds.<br>V,x)-<br>tds.um_cBEADxy*d(tds.<br>V,y))*test(cBEADx)+(-<br>tds.um_cBEADyx*d(tds.<br>V,x)-<br>tds.um_cBEADyy*d(tds.<br>V,y))*test(cBEADy)) | 4                 | Spatial           | Domain 1      |
| -<br>(tds.u*cKx+tds.v*cKy)*t<br>est(cK)*(isScalingSyste<br>mDomain==0)                                                                                                                                  | 4                 | Spatial           | Domain 1      |
| tds.cbf_cK*test(cK)                                                                                                                                                                                     | 4                 | Spatial           | Boundaries 1- |

| Weak expression                                                         | Integration order | Integration frame | Selection       |
|-------------------------------------------------------------------------|-------------------|-------------------|-----------------|
|                                                                         |                   |                   | 12              |
| -<br>(tds.u*cClx+tds.v*cCly)*<br>test(cCl)*(isScalingSystemDomain==0)   | 4                 | Spatial           | Domain 1        |
| tds.cbf_cCl*test(cCl)                                                   | 4                 | Spatial           | Boundaries 1–12 |
| -<br>(tds.u*cH3Ox+tds.v*cH3Oy)*test(cH3O)*(isScalingSystemDomain==0)    | 4                 | Spatial           | Domain 1        |
| tds.cbf_cH3O*test(cH3O)                                                 | 4                 | Spatial           | Boundaries 1–12 |
| -<br>(tds.u*cOHx+tds.v*cOHy)*test(cOH)*(isScalingSystemDomain==0)       | 4                 | Spatial           | Domain 1        |
| tds.cbf_cOH*test(cOH)                                                   | 4                 | Spatial           | Boundaries 1–12 |
| -<br>(tds.u*cBEADx+tds.v*cBEADy)*test(cBEAD)*(isScalingSystemDomain==0) | 4                 | Spatial           | Domain 1        |
| tds.cbf_cBEAD*test(cBEAD)                                               | 4                 | Spatial           | Boundaries 1–12 |
| tds.streamline*(isScalingSystemDomain==0)                               | 4                 | Spatial           | Domain 1        |
| tds.crosswind*(isScalingSystemDomain==0)                                | 6                 | Spatial           | Domain 1        |

## 2.6.4 No Flux 1

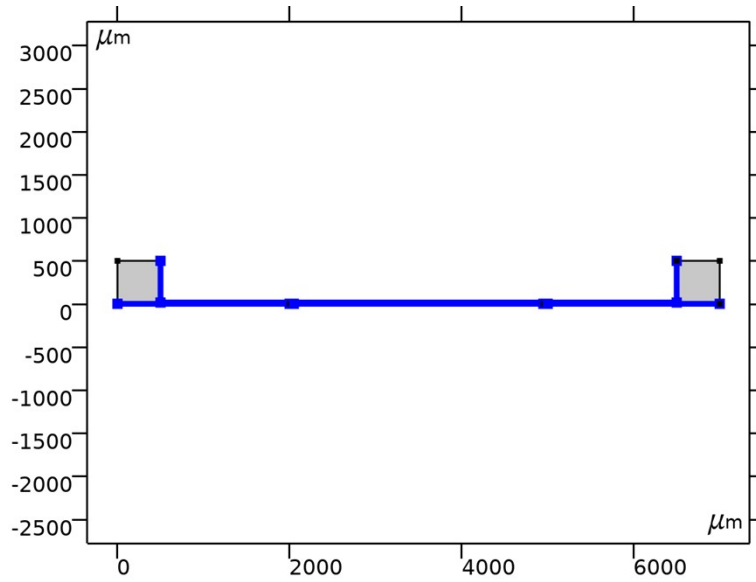

*No Flux 1*

### SELECTION

|                        |                                             |
|------------------------|---------------------------------------------|
| Geometric entity level | Boundary                                    |
| Selection              | Geometry geom1: Dimension 1: All boundaries |

### EQUATIONS

$$-\mathbf{n} \cdot \mathbf{J}_i = 0$$

### Convection

#### SETTINGS

| Descriptio<br>n | Value |
|-----------------|-------|
| Include         | Off   |



## 2.6.5 Initial Values 1



*Initial Values 1*

### SELECTION

|                        |                                          |
|------------------------|------------------------------------------|
| Geometric entity level | Domain                                   |
| Selection              | Geometry geom1: Dimension 2: All domains |

### Initial values

#### SETTINGS

| Description   | Value                                     |
|---------------|-------------------------------------------|
| Concentration | {cK0 + cBEAD0, cCl0, cH3O0, cOH0, cBEAD0} |

## 2.6.6 Inflow 1

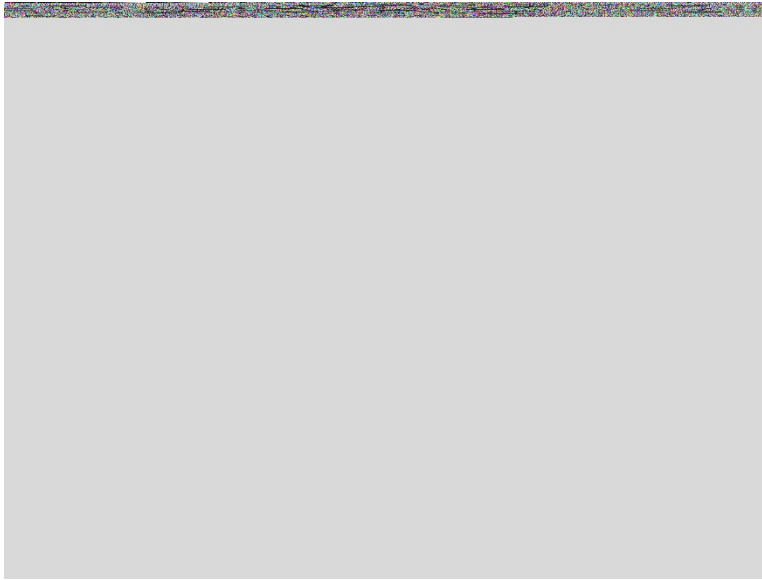

*Inflow 1*

### SELECTION

|                        |                                               |
|------------------------|-----------------------------------------------|
| Geometric entity level | Boundary                                      |
| Selection              | Geometry geom1: Dimension 1: Boundaries 11–12 |

### EQUATIONS

$$c_i = c_{0j}$$

.....

### Concentration

#### SETTINGS

| Description   | Value                                     |
|---------------|-------------------------------------------|
| Concentration | {cK0 + cBEAD0, cCl0, cH3O0, cOH0, cBEAD0} |

### Boundary condition type

#### SETTINGS

| Description             | Value                    |
|-------------------------|--------------------------|
| Boundary condition type | Concentration constraint |

### Variables

| Name      | Expression | Unit               | Description   | Selection        | Details     |
|-----------|------------|--------------------|---------------|------------------|-------------|
| tds.c0_cK | cK0+cBEAD0 | mol/m <sup>3</sup> | Concentration | Boundaries 11–12 | + operation |

| Name                 | Expression                                                                                                                                                                                          | Unit               | Description   | Selection        | Details     |
|----------------------|-----------------------------------------------------------------------------------------------------------------------------------------------------------------------------------------------------|--------------------|---------------|------------------|-------------|
| tds.c0_cCl           | cClO                                                                                                                                                                                                | mol/m <sup>3</sup> | Concentration | Boundaries 11–12 | + operation |
| tds.c0_cH3O          | cH3O0                                                                                                                                                                                               | mol/m <sup>3</sup> | Concentration | Boundaries 11–12 | + operation |
| tds.c0_cOH           | cOH0                                                                                                                                                                                                | mol/m <sup>3</sup> | Concentration | Boundaries 11–12 | + operation |
| tds.c0_cBEAD         | cBEAD0                                                                                                                                                                                              | mol/m <sup>3</sup> | Concentration | Boundaries 11–12 | + operation |
| tds.in1.c0_avg_cK    | $\frac{\int (cK \cdot (t_s \cdot u \cdot t_{dx} + t_s \cdot v \cdot t_{dy} + t_s \cdot w \cdot t_{dz}))}{\int (t_s \cdot u \cdot t_{dx} + t_s \cdot v \cdot t_{dy} + t_s \cdot w \cdot t_{dz})}$    | mol/m <sup>3</sup> | Concentration | Global           |             |
| tds.in1.c0_avg_cCl   | $\frac{\int (cCl \cdot (t_s \cdot u \cdot t_{dx} + t_s \cdot v \cdot t_{dy} + t_s \cdot w \cdot t_{dz}))}{\int (t_s \cdot u \cdot t_{dx} + t_s \cdot v \cdot t_{dy} + t_s \cdot w \cdot t_{dz})}$   | mol/m <sup>3</sup> | Concentration | Global           |             |
| tds.in1.c0_avg_cH3O  | $\frac{\int (cH3O \cdot (t_s \cdot u \cdot t_{dx} + t_s \cdot v \cdot t_{dy} + t_s \cdot w \cdot t_{dz}))}{\int (t_s \cdot u \cdot t_{dx} + t_s \cdot v \cdot t_{dy} + t_s \cdot w \cdot t_{dz})}$  | mol/m <sup>3</sup> | Concentration | Global           |             |
| tds.in1.c0_avg_cOH   | $\frac{\int (cOH \cdot (t_s \cdot u \cdot t_{dx} + t_s \cdot v \cdot t_{dy} + t_s \cdot w \cdot t_{dz}))}{\int (t_s \cdot u \cdot t_{dx} + t_s \cdot v \cdot t_{dy} + t_s \cdot w \cdot t_{dz})}$   | mol/m <sup>3</sup> | Concentration | Global           |             |
| tds.in1.c0_avg_cBEAD | $\frac{\int (cBEAD \cdot (t_s \cdot u \cdot t_{dx} + t_s \cdot v \cdot t_{dy} + t_s \cdot w \cdot t_{dz}))}{\int (t_s \cdot u \cdot t_{dx} + t_s \cdot v \cdot t_{dy} + t_s \cdot w \cdot t_{dz})}$ | mol/m <sup>3</sup> | Concentration | Global           |             |

## Constraints

| Constraint          | Constraint force | Shape function       | Selection        | Details   |
|---------------------|------------------|----------------------|------------------|-----------|
| -cK+tds.c0_cK       | -test(cK)        | Lagrange (Quadratic) | Boundaries 11-12 | Elemental |
| -cCl+tds.c0_cCl     | -test(cCl)       | Lagrange (Quadratic) | Boundaries 11-12 | Elemental |
| -cH3O+tds.c0_cH3O   | -test(cH3O)      | Lagrange (Quadratic) | Boundaries 11-12 | Elemental |
| -cOH+tds.c0_cOH     | -test(cOH)       | Lagrange (Quadratic) | Boundaries 11-12 | Elemental |
| -cBEAD+tds.c0_cBEAD | -test(cBEAD)     | Lagrange (Quadratic) | Boundaries 11-12 | Elemental |

### 2.6.7 Outflow 1

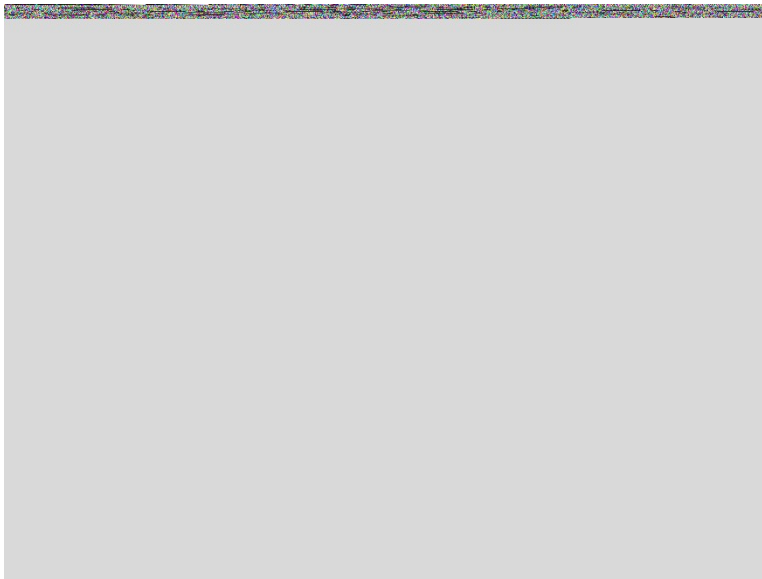

*Outflow 1*

#### SELECTION

|                        |                                              |
|------------------------|----------------------------------------------|
| Geometric entity level | Boundary                                     |
| Selection              | Geometry geom1: Dimension 1: Boundaries 1, 3 |

#### EQUATIONS

$$\mathbf{n} \cdot D_i \nabla c_i = 0$$

## Variables

| Name                  | Expression                                                                                                                                                                                                                            | Unit               | Description   | Selection |
|-----------------------|---------------------------------------------------------------------------------------------------------------------------------------------------------------------------------------------------------------------------------------|--------------------|---------------|-----------|
| tds.out1.c0_avg_cK    | $\frac{\text{tds.out1.int}(cK*(\text{tds.u}*\text{tds.nx} + \text{tds.v}*\text{tds.ny} + \text{tds.w}*\text{tds.nz}))}{\text{tds.out1.int}(\text{tds.u}*\text{tds.nx} + \text{tds.v}*\text{tds.ny} + \text{tds.w}*\text{tds.nz})}$    | mol/m <sup>3</sup> | Concentration | Global    |
| tds.out1.c0_avg_cCl   | $\frac{\text{tds.out1.int}(cCl*(\text{tds.u}*\text{tds.nx} + \text{tds.v}*\text{tds.ny} + \text{tds.w}*\text{tds.nz}))}{\text{tds.out1.int}(\text{tds.u}*\text{tds.nx} + \text{tds.v}*\text{tds.ny} + \text{tds.w}*\text{tds.nz})}$   | mol/m <sup>3</sup> | Concentration | Global    |
| tds.out1.c0_avg_cH3O  | $\frac{\text{tds.out1.int}(cH3O*(\text{tds.u}*\text{tds.nx} + \text{tds.v}*\text{tds.ny} + \text{tds.w}*\text{tds.nz}))}{\text{tds.out1.int}(\text{tds.u}*\text{tds.nx} + \text{tds.v}*\text{tds.ny} + \text{tds.w}*\text{tds.nz})}$  | mol/m <sup>3</sup> | Concentration | Global    |
| tds.out1.c0_avg_cOH   | $\frac{\text{tds.out1.int}(cOH*(\text{tds.u}*\text{tds.nx} + \text{tds.v}*\text{tds.ny} + \text{tds.w}*\text{tds.nz}))}{\text{tds.out1.int}(\text{tds.u}*\text{tds.nx} + \text{tds.v}*\text{tds.ny} + \text{tds.w}*\text{tds.nz})}$   | mol/m <sup>3</sup> | Concentration | Global    |
| tds.out1.c0_avg_cBEAD | $\frac{\text{tds.out1.int}(cBEAD*(\text{tds.u}*\text{tds.nx} + \text{tds.v}*\text{tds.ny} + \text{tds.w}*\text{tds.nz}))}{\text{tds.out1.int}(\text{tds.u}*\text{tds.nx} + \text{tds.v}*\text{tds.ny} + \text{tds.w}*\text{tds.nz})}$ | mol/m <sup>3</sup> | Concentration | Global    |

## Weak expressions

| Weak expression                                                                                                                                                                                                                                                                                                                                                                                                                                                           | Integration order | Integration frame | Selection       |
|---------------------------------------------------------------------------------------------------------------------------------------------------------------------------------------------------------------------------------------------------------------------------------------------------------------------------------------------------------------------------------------------------------------------------------------------------------------------------|-------------------|-------------------|-----------------|
| 0                                                                                                                                                                                                                                                                                                                                                                                                                                                                         | 4                 | Spatial           | Boundaries 1, 3 |
| $-\text{tds.z\_cK}*F\_const*cK*(-\text{tds.nx}*(\text{tds.um\_cKxx}*mean(d(\text{tds.V},x)) + \text{tds.um\_cKxy}*mean(d(\text{tds.V},y)) + \text{tds.um\_cKxz}*mean(0)) - \text{tds.ny}*(\text{tds.um\_cKyx}*mean(d(\text{tds.V},x)) + \text{tds.um\_cKyy}*mean(d(\text{tds.V},y)) + \text{tds.um\_cKyz}*mean(0)) - \text{tds.nz}*(\text{tds.um\_cKzx}*mean(d(\text{tds.V},x)) + \text{tds.um\_cKzy}*mean(d(\text{tds.V},y)) + \text{tds.um\_cKzz}*mean(0))) * test(cK)$ | 4                 | Spatial           | Boundaries 1, 3 |
| 0                                                                                                                                                                                                                                                                                                                                                                                                                                                                         | 4                 | Spatial           | Boundaries 1, 3 |
| $-\text{tds.z\_cCl}*F\_const*cCl*(-\text{tds.nx}*(\text{tds.um\_cClxx}*m$                                                                                                                                                                                                                                                                                                                                                                                                 | 4                 | Spatial           | Boundaries 1, 3 |

| Weak expression                                                                                                                                                                                                                                                                                                                                                                                                                                                                                                                                                                                                                                                                                                                                                    | Integration order | Integration frame | Selection       |
|--------------------------------------------------------------------------------------------------------------------------------------------------------------------------------------------------------------------------------------------------------------------------------------------------------------------------------------------------------------------------------------------------------------------------------------------------------------------------------------------------------------------------------------------------------------------------------------------------------------------------------------------------------------------------------------------------------------------------------------------------------------------|-------------------|-------------------|-----------------|
| $\begin{aligned} & \text{ean}(d(\text{tds.V},x))+\text{tds.um\_} \\ & \text{cClxy}*\text{mean}(d(\text{tds.V},y))+ \\ & \text{tds.um\_cClxz}*\text{mean}(0))- \\ & \text{tds.ny}*(\text{tds.um\_cClyx}* \\ & \text{mean}(d(\text{tds.V},x))+\text{tds.um\_} \\ & \text{cClyy}*\text{mean}(d(\text{tds.V},y))+ \\ & \text{tds.um\_cClyz}*\text{mean}(0))- \\ & \text{tds.nz}*(\text{tds.um\_cClzx}* \\ & \text{mean}(d(\text{tds.V},x))+\text{tds.um\_} \\ & \text{cClzy}*\text{mean}(d(\text{tds.V},y))+ \\ & \text{tds.um\_cClzz}*\text{mean}(0))) \\ & * \text{test}(cCl) \end{aligned}$                                                                                                                                                                         |                   |                   |                 |
| 0                                                                                                                                                                                                                                                                                                                                                                                                                                                                                                                                                                                                                                                                                                                                                                  | 4                 | Spatial           | Boundaries 1, 3 |
| $\begin{aligned} & - \\ & \text{tds.z\_CH3O}*\text{F\_const}*\text{CH} \\ & \text{3O}*(- \\ & \text{tds.nx}*(\text{tds.um\_CH3Oxx}* \\ & \text{mean}(d(\text{tds.V},x))+\text{tds.u} \\ & \text{m\_CH3Oxy}*\text{mean}(d(\text{tds.} \\ & \text{V},y))+\text{tds.um\_CH3Oxz}* \\ & \text{mean}(0))- \\ & \text{tds.ny}*(\text{tds.um\_CH3Oyx}* \\ & \text{mean}(d(\text{tds.V},x))+\text{tds.u} \\ & \text{m\_CH3Oyy}*\text{mean}(d(\text{tds.} \\ & \text{V},y))+\text{tds.um\_CH3Oyz}* \\ & \text{mean}(0))- \\ & \text{tds.nz}*(\text{tds.um\_CH3Ozx}* \\ & \text{mean}(d(\text{tds.V},x))+\text{tds.u} \\ & \text{m\_CH3Ozy}*\text{mean}(d(\text{tds.} \\ & \text{V},y))+\text{tds.um\_CH3Ozz}* \\ & \text{mean}(0)))* \text{test}(\text{CH3O}) \end{aligned}$ | 4                 | Spatial           | Boundaries 1, 3 |
| 0                                                                                                                                                                                                                                                                                                                                                                                                                                                                                                                                                                                                                                                                                                                                                                  | 4                 | Spatial           | Boundaries 1, 3 |
| $\begin{aligned} & - \\ & \text{tds.z\_cOH}*\text{F\_const}*\text{cOH} \\ & *(- \\ & \text{tds.nx}*(\text{tds.um\_cOHxx}* \\ & \text{mean}(d(\text{tds.V},x))+\text{tds.u} \\ & \text{m\_cOHxy}*\text{mean}(d(\text{tds.V} \\ & ,y))+\text{tds.um\_cOHxz}*\text{mea} \\ & \text{n}(0))- \\ & \text{tds.ny}*(\text{tds.um\_cOHyx}* \\ & \text{mean}(d(\text{tds.V},x))+\text{tds.u} \\ & \text{m\_cOHyy}*\text{mean}(d(\text{tds.V} \\ & ,y))+\text{tds.um\_cOHyz}*\text{mea} \\ & \text{n}(0))- \end{aligned}$                                                                                                                                                                                                                                                     | 4                 | Spatial           | Boundaries 1, 3 |

| Weak expression                                                                                                                                                                                                                                                                                                                                                                                                                                                                                                                                                                                                                                                                                                                                                                                                                                                               | Integration order | Integration frame | Selection       |
|-------------------------------------------------------------------------------------------------------------------------------------------------------------------------------------------------------------------------------------------------------------------------------------------------------------------------------------------------------------------------------------------------------------------------------------------------------------------------------------------------------------------------------------------------------------------------------------------------------------------------------------------------------------------------------------------------------------------------------------------------------------------------------------------------------------------------------------------------------------------------------|-------------------|-------------------|-----------------|
| $\text{tds.nz} * (\text{tds.um\_cOHzx} * \text{mean}(\text{d}(\text{tds.V}, \text{x})) + \text{tds.um\_cOHzy} * \text{mean}(\text{d}(\text{tds.V}, \text{y})) + \text{tds.um\_cOHzz} * \text{mean}(\text{d}(\text{tds.V}, \text{z}))) * \text{test}(\text{cOH})$                                                                                                                                                                                                                                                                                                                                                                                                                                                                                                                                                                                                              |                   |                   |                 |
| 0                                                                                                                                                                                                                                                                                                                                                                                                                                                                                                                                                                                                                                                                                                                                                                                                                                                                             | 4                 | Spatial           | Boundaries 1, 3 |
| $\begin{aligned} & - \text{tds.z\_cBEAD} * \text{F\_const} * \text{cBEAD} * (- \\ & \text{tds.nx} * (\text{tds.um\_cBEADxx} * \text{mean}(\text{d}(\text{tds.V}, \text{x})) + \text{tds.um\_cBEADxy} * \text{mean}(\text{d}(\text{tds.V}, \text{y})) + \text{tds.um\_cBEADxz} * \text{mean}(\text{d}(\text{tds.V}, \text{z}))) - \\ & \text{tds.ny} * (\text{tds.um\_cBEADyx} * \text{mean}(\text{d}(\text{tds.V}, \text{x})) + \text{tds.um\_cBEADyy} * \text{mean}(\text{d}(\text{tds.V}, \text{y})) + \text{tds.um\_cBEADyz} * \text{mean}(\text{d}(\text{tds.V}, \text{z}))) - \\ & \text{tds.nz} * (\text{tds.um\_cBEADzx} * \text{mean}(\text{d}(\text{tds.V}, \text{x})) + \text{tds.um\_cBEADzy} * \text{mean}(\text{d}(\text{tds.V}, \text{y})) + \text{tds.um\_cBEADzz} * \text{mean}(\text{d}(\text{tds.V}, \text{z}))) * \text{test}(\text{cBEAD}) \end{aligned}$ | 4                 | Spatial           | Boundaries 1, 3 |

### 2.6.8 Flux 1

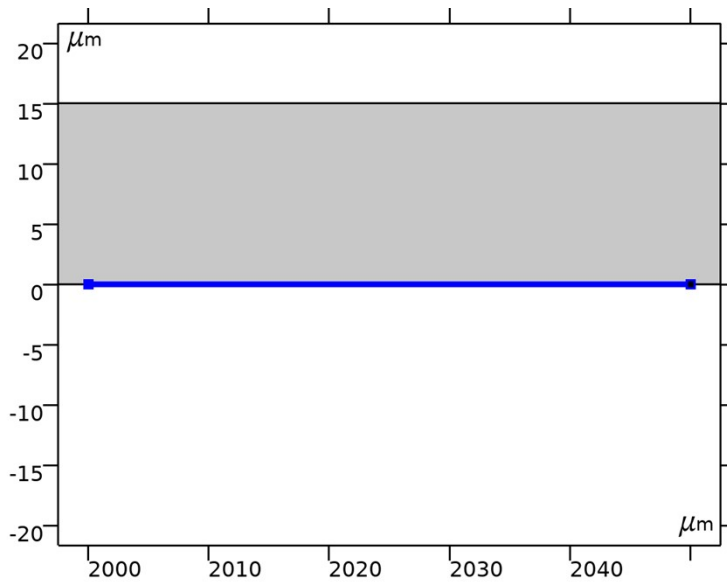

Flux 1

## SELECTION

|                        |                                         |
|------------------------|-----------------------------------------|
| Geometric entity level | Boundary                                |
| Selection              | Geometry geom1: Dimension 1: Boundary 6 |

## EQUATIONS

$$-\mathbf{n} \cdot \mathbf{J}_i = J_{0,i}$$

### Convection

#### SETTINGS

| Description | Value |
|-------------|-------|
| Include     | Off   |

### Inward flux

#### SETTINGS

| Description   | Value               |
|---------------|---------------------|
| Flux type     | General inward flux |
| Species cK    | Off                 |
| Species cCl   | Off                 |
| Species cH3O  | On                  |
| Species cOH   | Off                 |
| Species cBEAD | Off                 |

### Weak expressions

| Weak expression   | Integration order | Integration frame | Selection  |
|-------------------|-------------------|-------------------|------------|
| 0                 | 4                 | Spatial           | Boundary 6 |
| 0                 | 4                 | Spatial           | Boundary 6 |
| f_elec*test(cH3O) | 4                 | Spatial           | Boundary 6 |
| 0                 | 4                 | Spatial           | Boundary 6 |
| 0                 | 4                 | Spatial           | Boundary 6 |



## 2.6.9 Flux 2

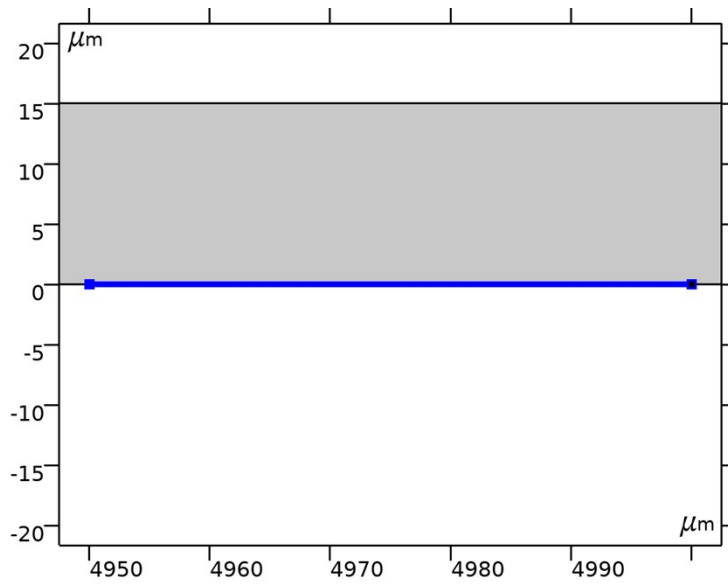

*Flux 2*

### SELECTION

|                        |                                         |
|------------------------|-----------------------------------------|
| Geometric entity level | Boundary                                |
| Selection              | Geometry geom1: Dimension 1: Boundary 8 |

### EQUATIONS

$$-\mathbf{n} \cdot \mathbf{j}_i = j_{0,i}$$

### Convection

#### SETTINGS

| Description | Value |
|-------------|-------|
| Include     | Off   |

### Inward flux

#### SETTINGS

| Description  | Value               |
|--------------|---------------------|
| Flux type    | General inward flux |
| Species cK   | Off                 |
| Species cCl  | Off                 |
| Species cH3O | Off                 |
| Species cOH  | On                  |
| Species      | Off                 |

| Description | Value |
|-------------|-------|
| cBEAD       |       |

### Weak expressions

| Weak expression  | Integration order | Integration frame | Selection  |
|------------------|-------------------|-------------------|------------|
| 0                | 4                 | Spatial           | Boundary 8 |
| 0                | 4                 | Spatial           | Boundary 8 |
| 0                | 4                 | Spatial           | Boundary 8 |
| f_elec*test(cOH) | 4                 | Spatial           | Boundary 8 |
| 0                | 4                 | Spatial           | Boundary 8 |

### 2.6.10 Reactions 1

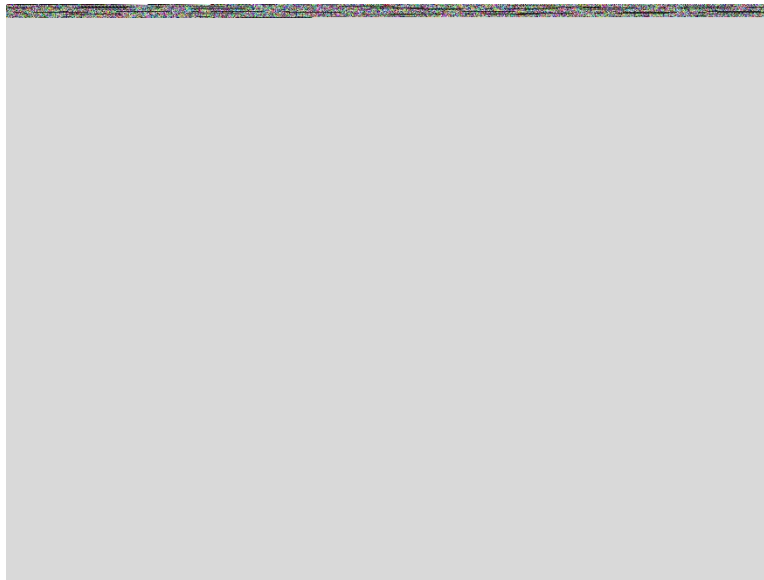

#### Reactions 1

##### SELECTION

|                        |                                          |
|------------------------|------------------------------------------|
| Geometric entity level | Domain                                   |
| Selection              | Geometry geom1: Dimension 2:<br>Domain 1 |

##### EQUATIONS

$$\nabla \cdot \mathbf{J}_i + \mathbf{u} \cdot \nabla c_i = R_i + S_i$$

## Reaction rates

### SETTINGS

| Description           | Value                                                                                        |
|-----------------------|----------------------------------------------------------------------------------------------|
| Total rate expression | User defined                                                                                 |
| Total rate expression | 0                                                                                            |
| Total rate expression | User defined                                                                                 |
| Total rate expression | 0                                                                                            |
| Total rate expression | User defined                                                                                 |
| Total rate expression | $k_{\text{fhydro}} \cdot \text{cH2O} - k_{\text{bhydro}} \cdot \text{cOH} \cdot \text{cH3O}$ |
| Total rate expression | User defined                                                                                 |
| Total rate expression | $k_{\text{fhydro}} \cdot \text{cH2O} - k_{\text{bhydro}} \cdot \text{cOH} \cdot \text{cH3O}$ |
| Total rate expression | User defined                                                                                 |
| Total rate expression | 0                                                                                            |

## Variables

| Name              | Expression          | Unit                    | Description           | Selection | Details     |
|-------------------|---------------------|-------------------------|-----------------------|-----------|-------------|
| tds.R_cK          | tds.reac1.R_cK      | mol/(m <sup>3</sup> ·s) | Total rate expression | Domain 1  | + operation |
| tds.R_cCl         | tds.reac1.R_cCl     | mol/(m <sup>3</sup> ·s) | Total rate expression | Domain 1  | + operation |
| tds.R_cH3O        | tds.reac1.R_cH3O    | mol/(m <sup>3</sup> ·s) | Total rate expression | Domain 1  | + operation |
| tds.R_cOH         | tds.reac1.R_cOH     | mol/(m <sup>3</sup> ·s) | Total rate expression | Domain 1  | + operation |
| tds.R_cBEAD       | tds.reac1.R_cBEAD   | mol/(m <sup>3</sup> ·s) | Total rate expression | Domain 1  | + operation |
| tds.reac1.R_cK    | model.input.R_cK    | mol/(m <sup>3</sup> ·s) | Total rate expression | Domain 1  | Meta        |
| tds.reac1.R_cCl   | model.input.R_cCl   | mol/(m <sup>3</sup> ·s) | Total rate expression | Domain 1  | Meta        |
| tds.reac1.R_cH3O  | model.input.R_cH3O  | mol/(m <sup>3</sup> ·s) | Total rate expression | Domain 1  | Meta        |
| tds.reac1.R_cOH   | model.input.R_cOH   | mol/(m <sup>3</sup> ·s) | Total rate expression | Domain 1  | Meta        |
| tds.reac1.R_cBEAD | model.input.R_cBEAD | mol/(m <sup>3</sup> ·s) | Total rate expression | Domain 1  | Meta        |

## Weak expressions

| Weak expression               | Integration order | Integration frame | Selection |
|-------------------------------|-------------------|-------------------|-----------|
| tds.reac1.R_cK*test(cK)       | 4                 | Spatial           | Domain 1  |
| tds.reac1.R_cCl*test(cCl)     | 4                 | Spatial           | Domain 1  |
| tds.reac1.R_cH3O*test(cH3O)   | 4                 | Spatial           | Domain 1  |
| tds.reac1.R_cOH*test(cOH)     | 4                 | Spatial           | Domain 1  |
| tds.reac1.R_cBEAD*test(cBEAD) | 4                 | Spatial           | Domain 1  |

## 2.7 MESH 1

### MESH STATISTICS

| Description             | Value  |
|-------------------------|--------|
| Minimum element quality | 0.6386 |
| Average element quality | 0.9686 |
| Triangle                | 76191  |
| Edge element            | 5773   |
| Vertex element          | 12     |

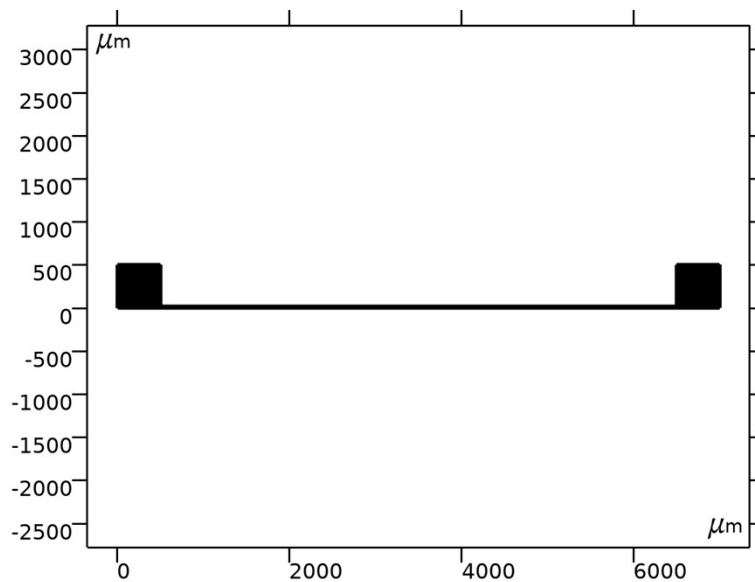

Mesh 1

### 2.7.1 Size (size)

#### SETTINGS

| Description                 | Value          |
|-----------------------------|----------------|
| Calibrate for               | Fluid dynamics |
| Maximum element size        | 22.5           |
| Minimum element size        | 1              |
| Curvature factor            | 0.3            |
| Maximum element growth rate | 1.15           |

## 2.7.2 Size 1 (size1)

### SELECTION

|                        |                                                           |
|------------------------|-----------------------------------------------------------|
| Geometric entity level | Boundary                                                  |
| Selection              | Geometry geom1: Dimension 1: Boundaries 1, 3, 6, 8, 11–12 |

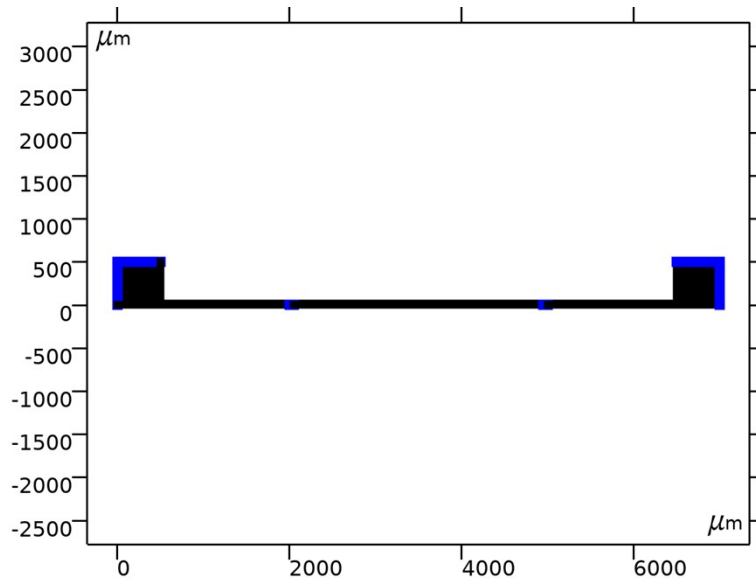

### Size 1

### SETTINGS

| Description                  | Value          |
|------------------------------|----------------|
| Calibrate for                | Fluid dynamics |
| Minimum element size         | 0.08           |
| Curvature factor             | 0.25           |
| Curvature factor             | Off            |
| Resolution of narrow regions | Off            |
| Maximum element growth rate  | 1.08           |

| Description         | Value      |
|---------------------|------------|
| Predefined size     | Extra fine |
| Custom element size | Custom     |

### 2.7.3 Size 2 (size2)

#### SELECTION

|                        |                                                         |
|------------------------|---------------------------------------------------------|
| Geometric entity level | Boundary                                                |
| Selection              | Geometry geom1: Dimension 1: Boundaries 2, 4-5, 7, 9-10 |

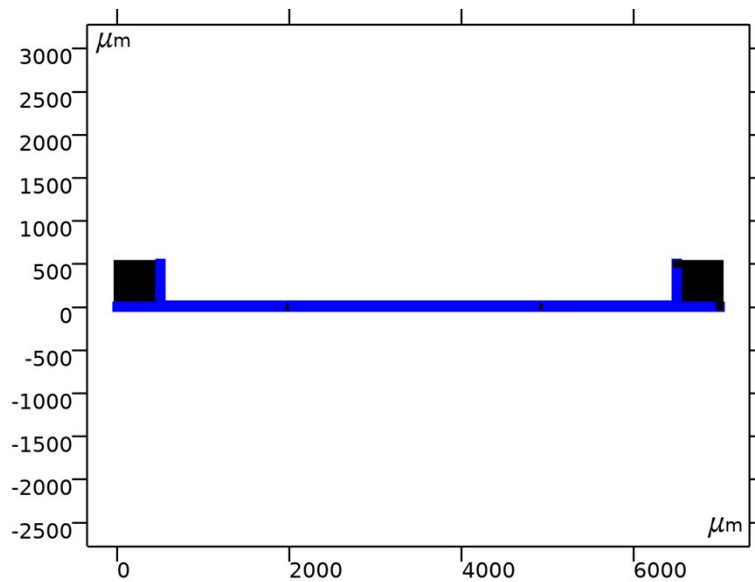

Size 2

#### SETTINGS

| Description                  | Value          |
|------------------------------|----------------|
| Calibrate for                | Fluid dynamics |
| Maximum element size         | 4              |
| Minimum element size         | 0.25           |
| Curvature factor             | 0.25           |
| Curvature factor             | Off            |
| Resolution of narrow regions | Off            |
| Maximum element growth rate  | 1.12           |
| Predefined size              | Finer          |
| Custom element size          | Custom         |

## 2.7.4 Free Triangular 1 (ftri1)

### SELECTION

|                        |           |
|------------------------|-----------|
| Geometric entity level | Domain    |
| Selection              | Remaining |

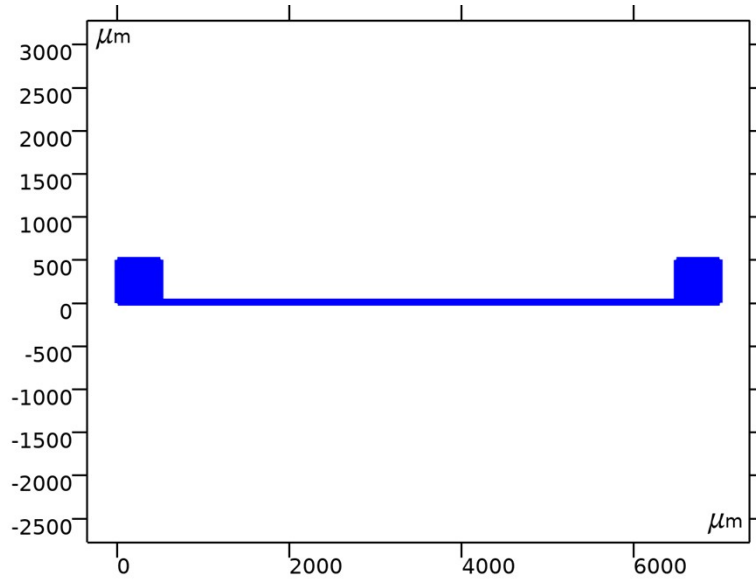

*Free Triangular 1*

### 3 Study 1

#### COMPUTATION INFORMATION

|                  |                                                |
|------------------|------------------------------------------------|
| Computation time | 5 min 33 s                                     |
| CPU              | Intel64 Family 6 Model 44 Stepping 2, 12 cores |
| Operating system | Windows 7                                      |

#### 3.1 STATIONARY

##### STUDY SETTINGS

| Description                    | Value |
|--------------------------------|-------|
| Include geometric nonlinearity | Off   |

##### PHYSICS AND VARIABLES SELECTION

| Physics interface                  | Discretization |
|------------------------------------|----------------|
| Laminar Flow (spf)                 | physics        |
| Electrostatics (es)                | physics        |
| Transport of Diluted Species (tds) | physics        |

##### MESH SELECTION

| Geometry           | Mesh  |
|--------------------|-------|
| Geometry 1 (geom1) | mesh1 |

#### 3.2 SOLVER CONFIGURATIONS

##### 3.2.1 Solution 2

###### Compile Equations: Stationary (st1)

##### STUDY AND STEP

| Description    | Value |
|----------------|-------|
| Use study      |       |
| Use study step |       |

##### LOG



```

<---- Compile Equations: Stationary in Study 1/Solution 2 (sol2) -----
--
Started at May 26, 2021 11:00:50 AM.
Geometry shape order: Linear
Running on Intel64 Family 6 Model 44 Stepping 2, GenuineIntel.
Using 1 socket with 12 cores in total on CNS-R-WEL870984.
Available memory: 110.59 GB.
Time: 5 s.
Physical memory: 2.24 GB
Virtual memory: 2.46 GB
Ended at May 26, 2021 11:00:55 AM.
----- Compile Equations: Stationary in Study 1/Solution 2 (sol2) -----
->

```

## Dependent Variables 1 (v1)

### INITIAL VALUES OF VARIABLES SOLVED FOR

| Descriptio<br>n | Value    |
|-----------------|----------|
| Method          | Solution |
| Solution        |          |

### LOG

```

<---- Dependent Variables 1 in Study 1/Solution 2 (sol2) -----
--
Started at May 26, 2021 11:00:58 AM.
Initial values of variables solved for: Solution 2 (sol2).
Solution time: 0 s.
Physical memory: 2.1 GB
Virtual memory: 2.29 GB
Ended at May 26, 2021 11:00:59 AM.
----- Dependent Variables 1 in Study 1/Solution 2 (sol2) -----
->

```

## Concentration (comp1.cBEAD) (comp1\_cBEAD)

### GENERAL

| Description        | Value                                     |
|--------------------|-------------------------------------------|
| Field components   | comp1.cBEAD                               |
| Internal variables | {comp1.uflux.cBEAD,<br>comp1.dflux.cBEAD} |

## Concentration (comp1.cCl) (comp1\_cCl)

### GENERAL

| Description        | Value                              |
|--------------------|------------------------------------|
| Field components   | comp1.cCl                          |
| Internal variables | {comp1.uflux.cCl, comp1.dflux.cCl} |

### Concentration (comp1.cH3O) (comp1\_cH3O)

#### GENERAL

| Description        | Value                                   |
|--------------------|-----------------------------------------|
| Field components   | comp1.cH3O                              |
| Internal variables | {comp1.uflux.cH3O,<br>comp1.dflux.cH3O} |

### Concentration (comp1.cK) (comp1\_cK)

#### GENERAL

| Description        | Value                               |
|--------------------|-------------------------------------|
| Field components   | comp1.cK                            |
| Internal variables | {comp1.uflux.cK,<br>comp1.dflux.cK} |

### Concentration (comp1.cOH) (comp1\_cOH)

#### GENERAL

| Description        | Value                                 |
|--------------------|---------------------------------------|
| Field components   | comp1.cOH                             |
| Internal variables | {comp1.uflux.cOH,<br>comp1.dflux.cOH} |

### Pressure (comp1.p) (comp1\_p)

#### GENERAL

| Description      | Value       |
|------------------|-------------|
| Field components | comp1.<br>p |

### Velocity field (comp1.u) (comp1\_u)

#### GENERAL

| Description        | Value                          |
|--------------------|--------------------------------|
| Field components   | {comp1.u, comp1.v}             |
| Internal variables | comp1.spf.isFluidHasBeenSolved |

### Electric potential (comp1.V) (comp1\_V)

#### GENERAL

| Description      | Value       |
|------------------|-------------|
| Field components | comp1.<br>V |

## Stationary Solver 1 (s1)

### GENERAL

| Description           | Value |
|-----------------------|-------|
| Defined by study step |       |

### LOG

```
<---- Stationary Solver 1 in Study 1/Solution 2 (sol2) -----
--
Started at May 26, 2021 11:00:59 AM.
Nonlinear solver
Number of degrees of freedom solved for: 1306231 (plus 57791 internal DOFs).
Nonsymmetric matrix found.
Scales for dependent variables:
Concentration (compl.cBEAD): 5.3e+06
Concentration (compl.cCl): 1.7e+03
Concentration (compl.cH3O): 63
Concentration (compl.cK): 2.2e+03
Concentration (compl.cOH): 44
Pressure (compl.p): 40
Velocity field (compl.u): 5.2e+02
Electric potential (compl.V): 3.5e+04
Orthonormal null-space function used.
Iter      SolEst      ResEst      Damping      Stepsize #Res #Jac #Sol  LinErr
LinRes
   1         4e-07      5.5e+03      0.0100000      4e-07    2   1   2  4.1e-
12  9.2e-15
   2         1.2e-06      9.2e+02      1.0000000      0.11    4   2   4  3.9e-
12  1e-14
   3         3.9e-07      8.9e+02      1.0000000      8.3e-07   6   3   6  1.9e-
11  1.7e-14
Solution time: 325 s. (5 minutes, 25 seconds)
Physical memory: 11.45 GB
Virtual memory: 12.76 GB
Ended at May 26, 2021 11:06:24 AM.
----- Stationary Solver 1 in Study 1/Solution 2 (sol2) -----
->
```

## Advanced (aDef)

### ASSEMBLY SETTINGS

| Description            | Value |
|------------------------|-------|
| Reuse sparsity pattern | On    |

## Fully Coupled 1 (fc1)

### GENERAL

| Description   | Value |
|---------------|-------|
| Linear solver |       |

### METHOD AND TERMINATION

| <b>Description</b>           | <b>Value</b> |
|------------------------------|--------------|
| Initial damping factor       | 0.01         |
| Minimum damping factor       | 1.0E-6       |
| Maximum number of iterations | 100          |

## 4 Results

### 4.1 DATASETS

#### 4.1.1 Study 1/Solution 2

##### SOLUTION

| Description | Value                    |
|-------------|--------------------------|
| Solution    |                          |
| Component   | Save Point Geometry<br>1 |

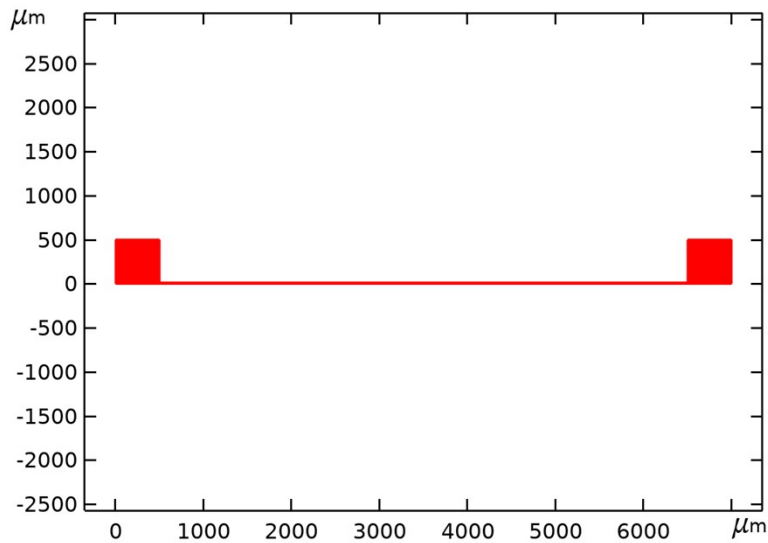

Dataset: Study 1/Solution 2

#### 4.1.2 Cut Line 2D 1

##### DATA

| Description | Value |
|-------------|-------|
| Dataset     |       |

##### LINE DATA

| Description       | Value            |
|-------------------|------------------|
| Line entry method | Two points       |
| Points            | {{0, 0}, {0, 0}} |
| Bounded by        | Off              |

| Description | Value |
|-------------|-------|
| points      |       |

#### ADVANCED

| Description      | Value            |
|------------------|------------------|
| Space variable   | cln1x            |
| Normal variables | {cln1nx, cln1ny} |

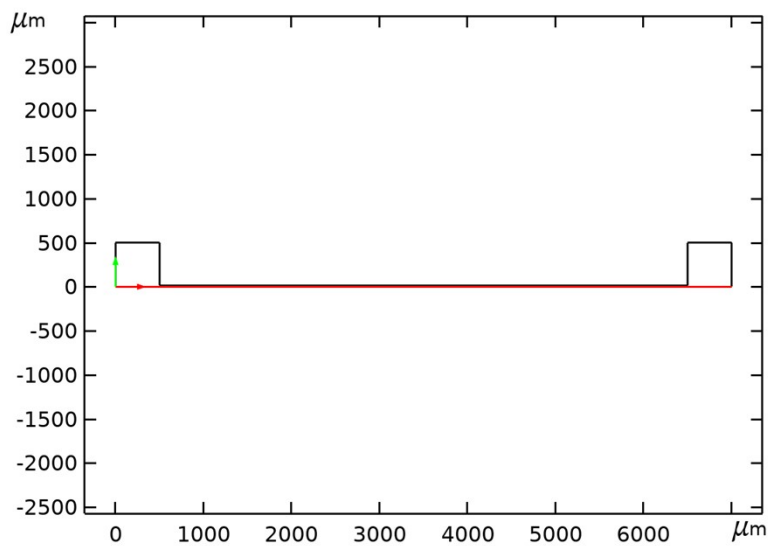

Dataset: Cut Line 2D 1

### 4.1.3 Cut Line 2D 2

#### DATA

| Description | Value |
|-------------|-------|
| Dataset     |       |

#### LINE DATA

| Description       | Value                |
|-------------------|----------------------|
| Line entry method | Two points           |
| Points            | {{0, 7.5}, {0, 7.5}} |
| Bounded by points | Off                  |

#### ADVANCED

| Description | Value |
|-------------|-------|
|-------------|-------|

| Description      | Value            |
|------------------|------------------|
| Space variable   | cln1x            |
| Normal variables | {cln1nx, cln1ny} |

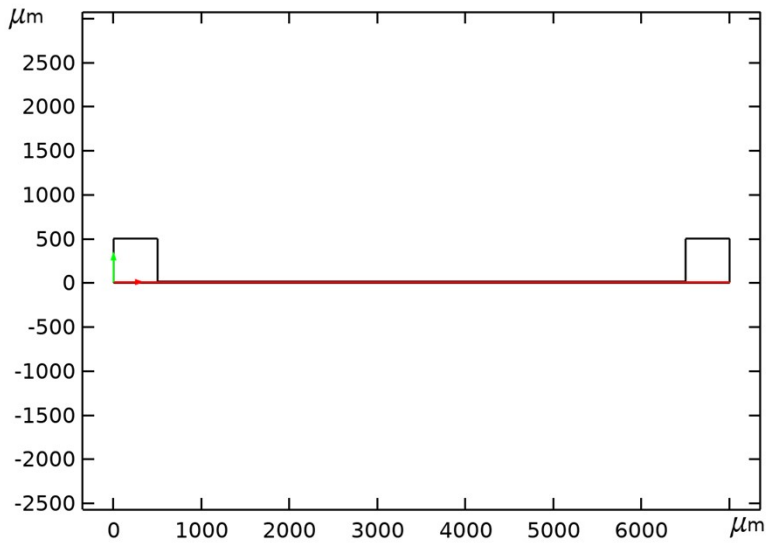

Dataset: Cut Line 2D 2

## 4.2 PLOT GROUPS

### 4.2.1 Velocity (spf) 1

Surface: Velocity magnitude (m/s)

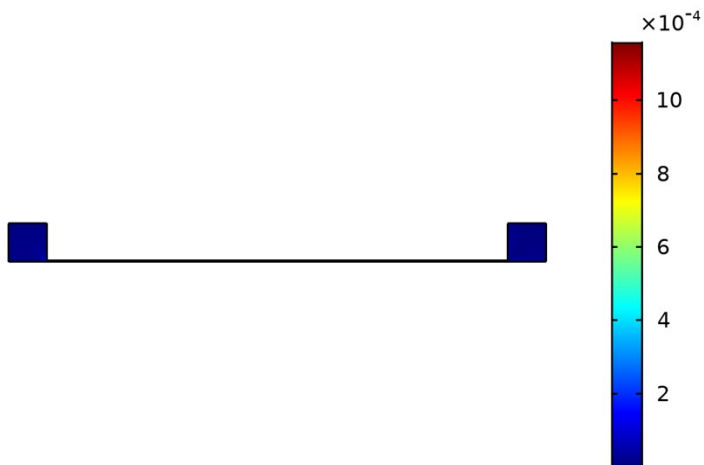

Surface: Velocity magnitude (m/s)

## 4.2.2 Pressure (spf) 1

Contour: Pressure (Pa)

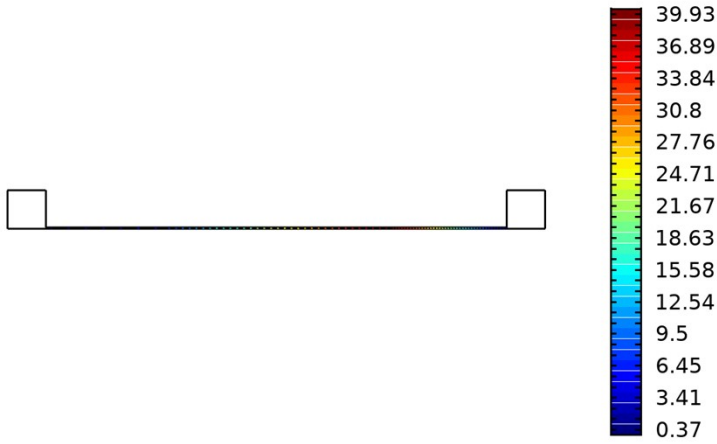

Contour: Pressure (Pa)

## 4.2.3 Electric Potential (es) 1

Surface: Electric potential (V)

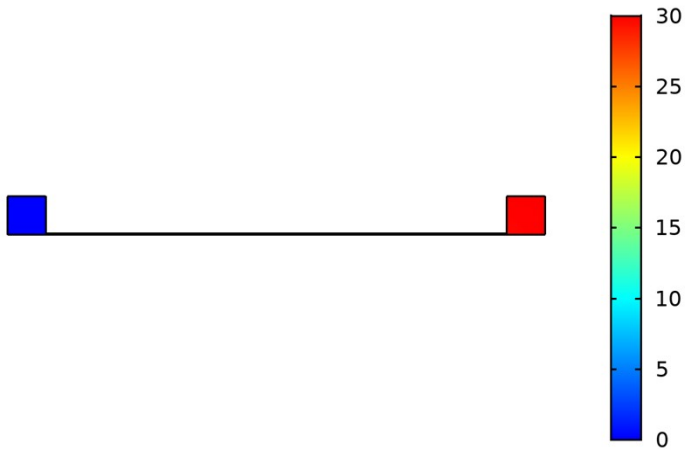

Surface: Electric potential (V)



#### 4.2.4 Concentration, K (tds) 1

Species K: Surface: Concentration (mol/m<sup>3</sup>) Streamline: Total flux

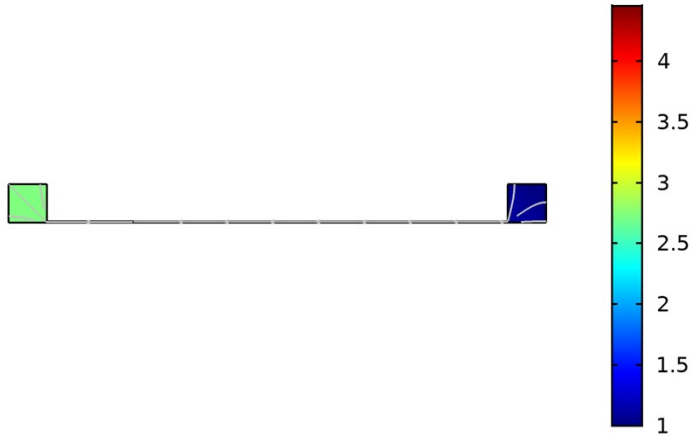

*Species K: Surface: Concentration (mol/m<sup>3</sup>) Streamline: Total flux*

#### 4.2.5 Concentration, Cl (tds) 1

Species Cl: Surface: Concentration (mol/m<sup>3</sup>)  
Streamline: Total flux

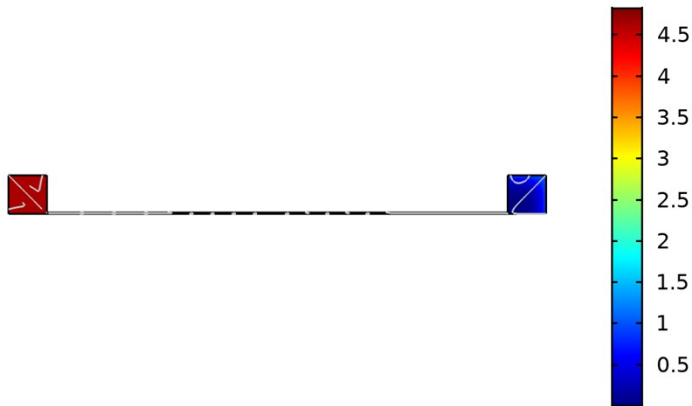

*Species Cl: Surface: Concentration (mol/m<sup>3</sup>) Streamline: Total flux*

## 4.2.6 Concentration, H3O (tds) 1

Species H3O: Surface: Concentration (mol/m<sup>3</sup>)  
Streamline: Total flux

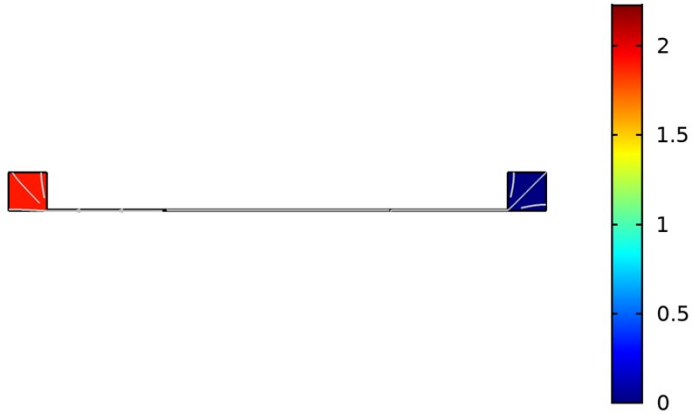

*Species H3O: Surface: Concentration (mol/m<sup>3</sup>) Streamline: Total flux*

## 4.2.7 Concentration, OH (tds) 1

Species OH: Surface: Concentration (mol/m<sup>3</sup>)  
Streamline: Total flux

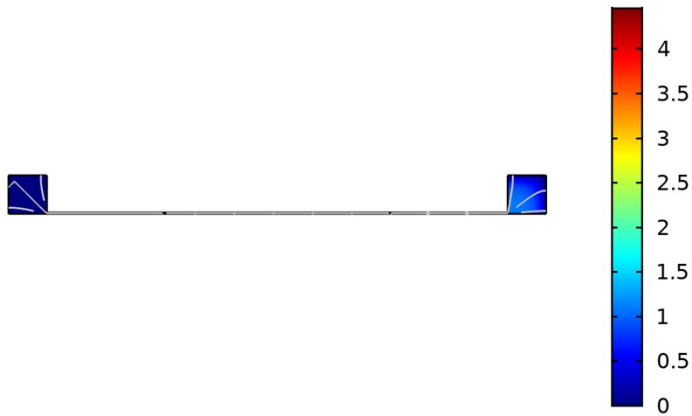

*Species OH: Surface: Concentration (mol/m<sup>3</sup>) Streamline: Total flux*

## 4.2.8 Concentration, BEAD (tds) 1

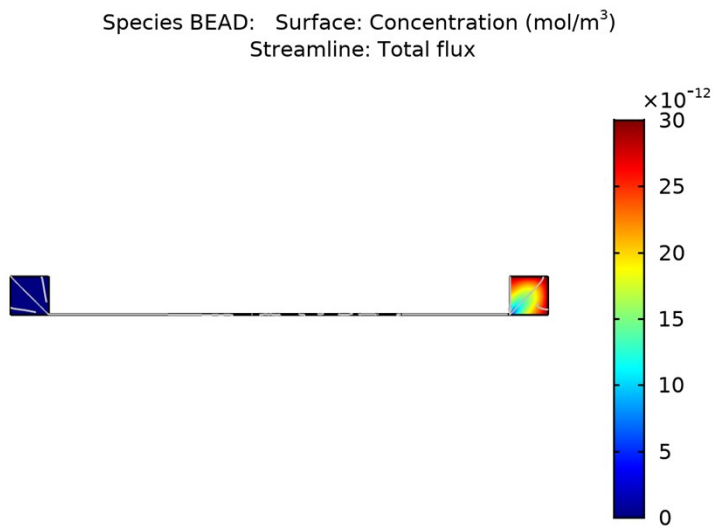

*Species BEAD: Surface: Concentration (mol/m<sup>3</sup>) Streamline: Total flux*

## 4.2.9 Microplastic concentration

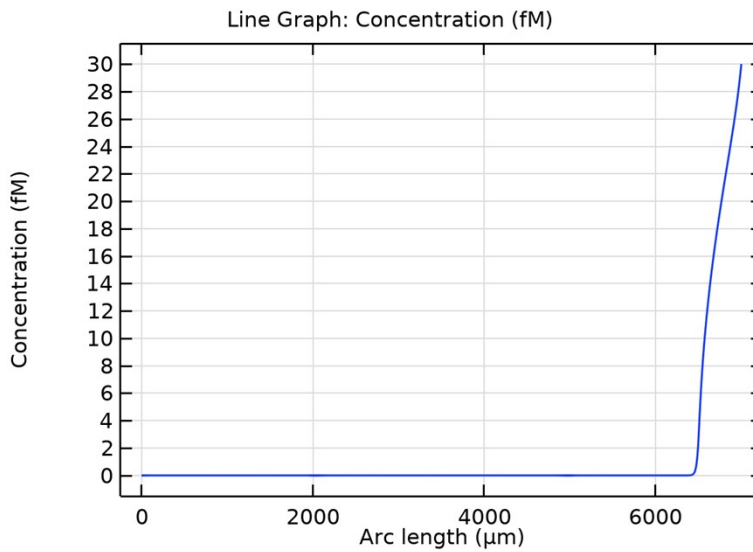

*Line Graph: Concentration (fM)*

## 4.2.10 pH

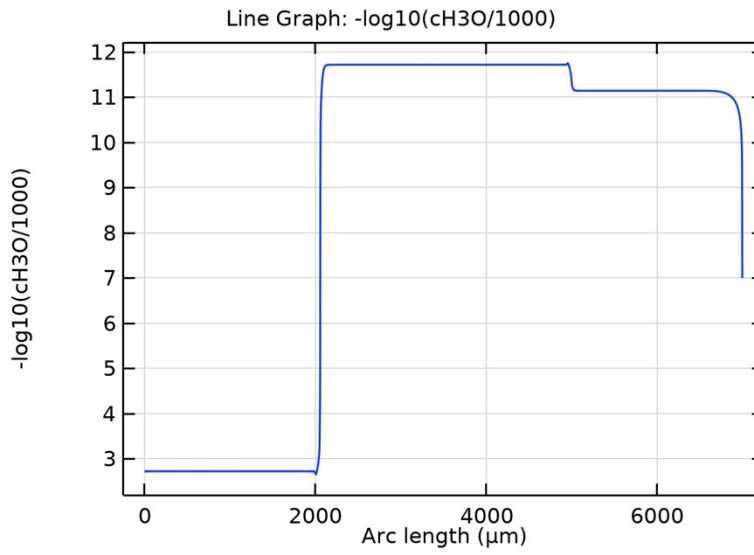

Line Graph:  $-\log_{10}(cH3O/1000)$

## 4.2.11 Electric field

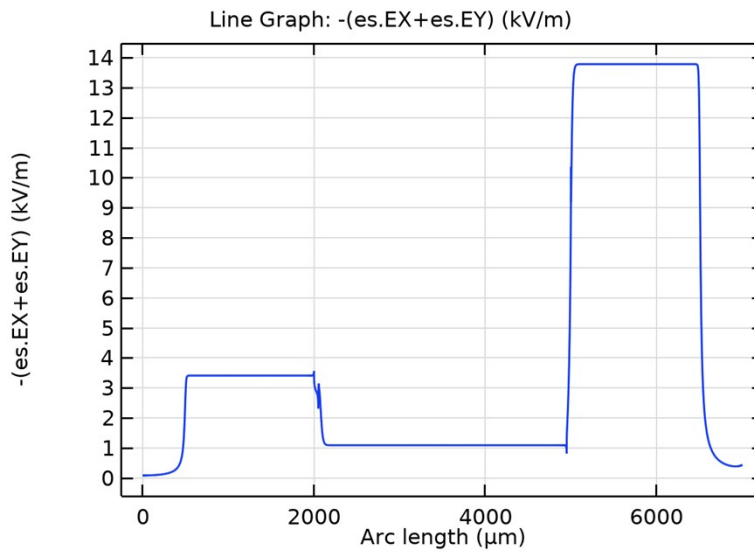

Line Graph:  $-(es.EX+es.EY)$  (kV/m)

## 4.2.12 Ionic current density

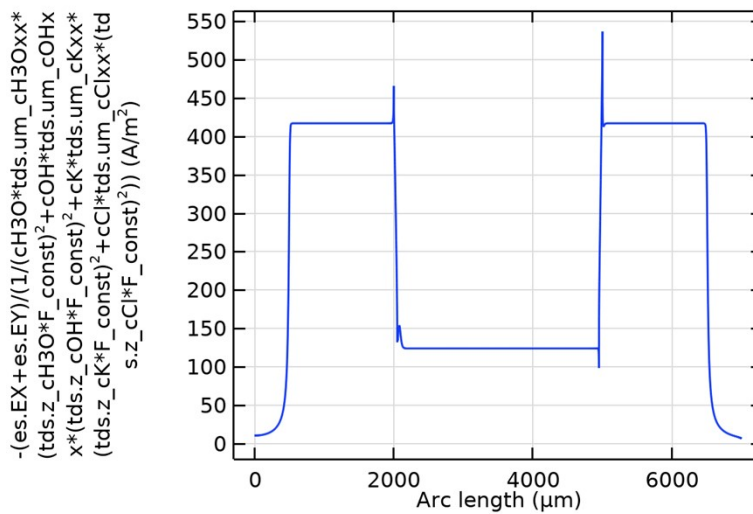

Line Graph: -

$(es.EX+es.EY)/(1/(cH3O*tds.um\_cH3Oxx*(tds.z\_cH3O*F\_const)^2+cOH*tds.um\_cOHxx*(tds.z\_cOH*F\_const)^2+cK*tds.um\_cKxx*(tds.z\_cK*F\_const)^2+cCl*tds.um\_cClxx*(tds.z\_cCl*F\_const)^2)) \text{ (A/m}^2\text{)}$

## 4.2.13 Solution resistivity

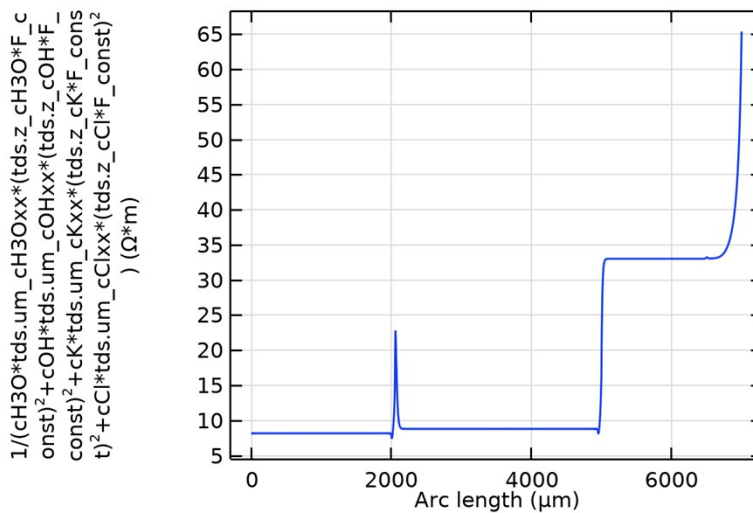

Line Graph:

$1/(cH3O*tds.um\_cH3Oxx*(tds.z\_cH3O*F\_const)^2+cOH*tds.um\_cOHxx*(tds.z\_cOH*F\_const)^2+cK*tds.um\_cKxx*(tds.z\_cK*F\_const)^2+cCl*tds.um\_cClxx*(tds.z\_cCl*F\_const)^2) \text{ (}\Omega\text{*m)}$
